# Supplementary material for: Cold and Heat Stress Diversely Alters Both Cauliflower Respiration and Distinct Mitochondrial Proteins Including OXPHOS Components and Matrix Enzymes
Source: Preprints.org preprint supplement (doi:10.20944/preprints201801.0280.v1), 2018-01-30
Supplement: Supplementary file 1 [file Figure S1.doc]

**kDa**


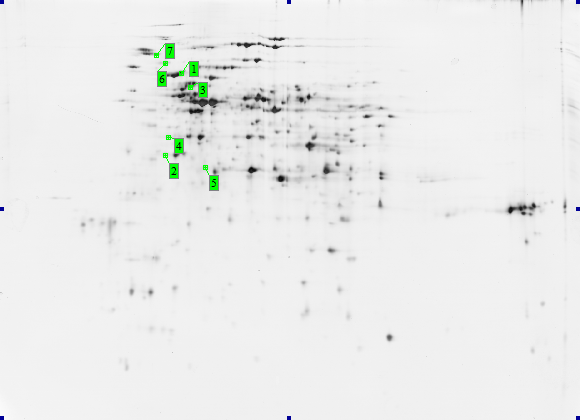

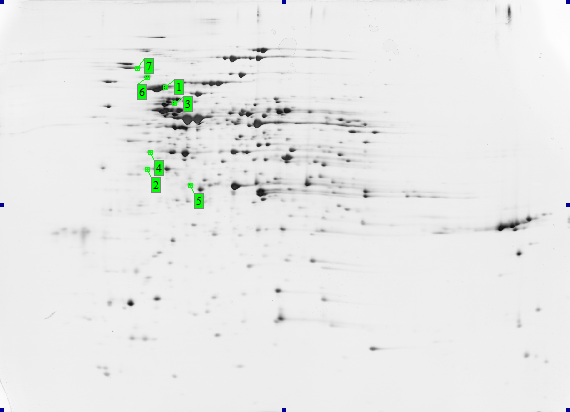

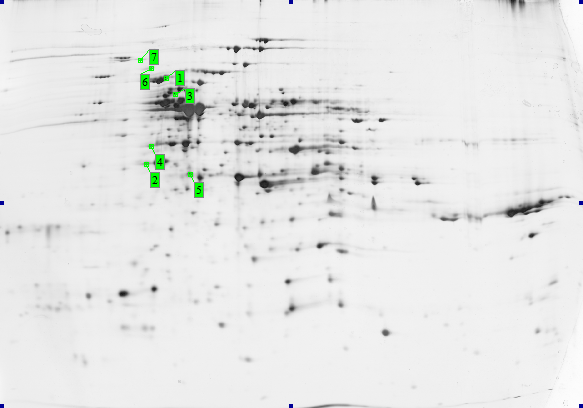

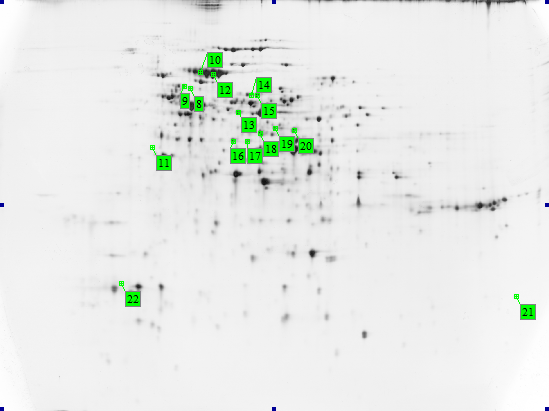

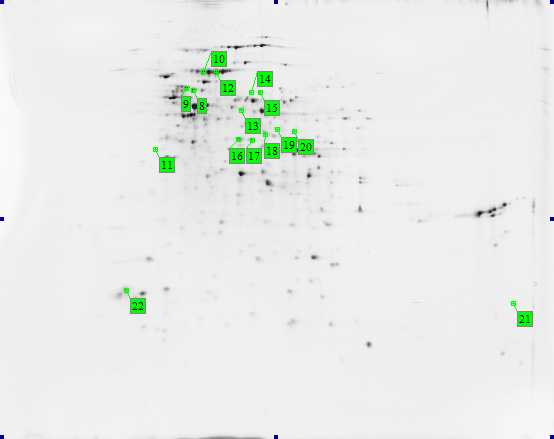

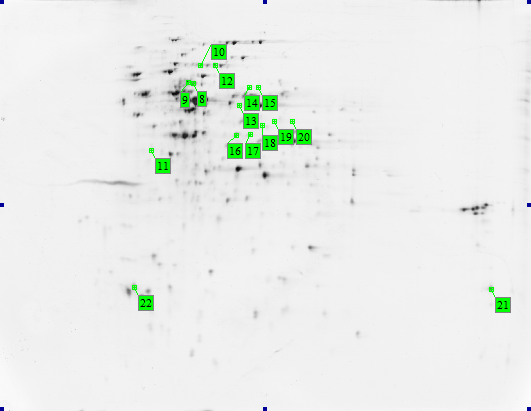


**20**

**H**

**K**

**HA**

**CA**

**C**

**K**

**pI**

**3 4 5 6 7 8 9 10**

**pI**

**3 4 5 6 7 8 9 10**

**94**

**67**

**43**

**30**

**14**

**94**

**67**

**43**

**30**

**20**

**14**

**kDa**

**Figure S1.** Representative silver-stained 2D gels of cauliflower mitochondrial proteome variations from control (**K**) grown plants, cold (**C**) and heat (**H**) stressed plants and from cold or heat recovered plants (**CA** and **HA**, respectively). 100 g of mitochondrial proteins were loaded onto all gels. 24- cm immobilised pH gradient strips (linear pH 3-10) for the first dimension and precasted Ettan DALT 12.5% SDS- polyacrylamide gels for the second dimension were used. Individual spots with variable intensity in each variant are indicated by green arrows next to the boxes. Protein molecular mass standards (Thermo Fisher Scientific) sizes are given in kilodaltons (kDa). pI- isoelectric point
