# Supplementary material for: Cold and Heat Stress Diversely Alters Both Cauliflower Respiration and Distinct Mitochondrial Proteins Including OXPHOS Components and Matrix Enzymes
Source: Preprints.org preprint supplement (doi:10.20944/preprints201801.0280.v1), 2018-01-30
Supplement: Supplementary file 2 [file Table S1.doc]

**Table S1.** List of cauliflower mitochondrial proteins whose level varied during stress treatment.

For each spot, values for nominal (computed) and observed isoelectric point (**pI**) and molecular mass (**M**, in kDa) and the mean normalized volume at each of analysed stress and control variants were indicated; aSpot number as index in the reference gel; bMean value with the standard deviation of three spot volumes at each analysed stage: control (**K**), cold stress (**C; spots 1-7**), heat stress (**H; spots 8-22**), cold recovery (**CA; spots no. 1-7**), heat recovery (**HA; spots 8-22**). In parantheses, the fold change of mean value for stress variants, comparing to control. Up-regulations are indicated by + and down-regulations by -. Significant regulations (according to HSD test) are bolded and underlined; the ones for cold, cold recovery, heat and heat recovery are highlighted in **blue**, **green**, **red** and **yellow**, respectively; cIn bold: functional categorisation (FunCat) using data from FunCat scheme (http:;;mips.gsf.de). Two-letter legend to all categories: **CM**- carbohydrate metabolism, **PrF**- protein fate, **AM**- amino-acid metabolism, **RC**- respiration (respiratory chain components), **PrS**- protein synthesis; dExponentially modified protein abundance index; eUniq. peps; tot. peps- number of unique peptides; number of total peptides for each protein spot; fLA- low-abundant protein (with the % volume of ca. 0.01); in this case the calculation of the fold change was not applicable. Further experimental details in ‘Materials and Methods’.

| **Spot no.a** | **Mean % volumeb** | | | **Assignment; Species; FunCatc** | **Protein record version** | **UniProt accession no.** | **AGI identifier** | **Nominal** | | **Observed** | | **Mascot score; emPAId** | **Coverage (%)** | **Uniq. peps; tot. pepse** |
| --- | --- | --- | --- | --- | --- | --- | --- | --- | --- | --- | --- | --- | --- | --- |
| **K** | **C ; H** | **CA ; HA** | **M** | **pI** | **M** | **pI** |
| 1 | 0.53±0.02 | **1.06±0.08** **[+2.00]** | 0.68±0.19 [+1.28] | Mitochondrial heat shock protein 70-1; Arabidopsis; **PrF** | CAB37531.1 | Q9SZJ3 | At4g37910 | 71.4 | 5.31 | 79 | 5.35 | 4732; 3.61 | 33 | 53; 129 |
| 2 | 0.11±0.01 | 0.21±0.06 [+1.91] | **0.22±0.03 [+2.00]** | Pyruvate dehydrogenase E1 beta subunit; Arabidopsis; **CM** | NP_199898.1 | Q38799 | At5g50850 | 39.4 | 5.67 | 39 | 5.16 | 5484; 2.94 | 29 | 73; 146 |
| 3 | 0.18±0.01 | **0.40±0.09** **[+2.22]** | 0.21±0.01 [+1.17] | 3-phosphoglycerate dehydrogenase- like protein; Arabidopsis; **AM** | NP_195146.1 | O49485 | At4g34200 | 63.6 | 6.16 | 72 | 5.43 | 7707; 1.48 | 31 | 112; 266 |
| 4 | 0.11±0.01 | 0.15±0.01 [+1.36] | **0.21±0.03** **[+1.91]** | Phosphoglycerate kinase 1; Arabidopsis; **CM** | NP_187884.1 | Q9LD57 | At3g12780 | 50.1 | 5.91 | 43 | 5.20 | 630; 1.44 | 28 | 9; 26 |
| 5 | 0.15±0.01 | 0.19±0.04 [+1.27] | **0.29±0.03** **[+1.93]** | Malate dehydrogenase (NAD), mitochondrial; Arabidopsis: **CM** | NP_564625.1 | Q9ZP06 | At1g53240 | 36.0 | 8.54 | 37 | 5.58 | 409; 0.98 | 22 | 10; 18 |
| 6 | 0.19±0.02 | **0.37±0.05** **[+1.95]** | 0.16±0.03 [-1.18] | Heat shock protein 81-2 (HSP 90 related); Arabidopsis; **PrF** | NP_200414.1 | P55737 | At5g56030 | 80.2 | 4.95 | 84 | 5.20 | 277; 0.43 | 14 | 0; 12 |
| 7 | 0.16±0.05 | **0.39±0.09** **[+2.44]** | 0.13±0.07 [-1.23] | Heat shock protein 90; Arabidopsis; **PrF** | BAF00175.1 | **Q0WRS4** | At3g07770 | 90.8 | 5.26 | 89 | 5.06 | 1996; 1.11 | 19 | 15; 75 |
| 8 | 0.17±0.02 | **0.64±0.19** **[+3.76]** | **0.48±0.07** **[+2.82]** | 3-phosphoglycerate dehydrogenase- like protein; Arabidopsis; **AM** | NP_195146.1 | O49485 | At4g34200 | 63.6 | 6.16 | 73 | 5.56 | 6778; 1.74 | 30 | 88; 237 |
| 9 | 0.25±0.03 | 0.72±0.31 [+2.88] | **0.72±0.16** **[+2.88]** | 3-phosphoglycerate dehydrogenase- like protein; Arabidopsis; **AM** | NP_195146.1 | O49485 | At4g34200 | 63.6 | 6.16 | 74 | 5.49 | 7997; 1.36 | 27 | 111; 301 |
| 10 | 0.05±0.03 | 0.06±0.01 [+1.20] | **0.19±0.04** **[+3.80]** | Phosphoglycerate kinase 1; Arabidopsis; **CM** | NP_187884.1 | Q9LD57 | At3g12780 | 50.2 | 5.91 | 81 | 5.50 | 1376; 2.57 | 42 | 22; 53 |
| 11 | 0.14±0.08 | 0.12±0.11 [-1.17] | **1.29±0.25** **[+9.21]** | Putative succinyl-CoA ligase (GDP-forming) beta subunit, mitochondrial; Arabidopsis; **CM** | NP_179632.1 | **O82662** | At2g20420 | 45.6 | 6.30 | 41 | 5.15 | 265; 0.88 | 17 | 11; 11 |
| 12 | 0.56±0.15 | 0.32±0.17 [-1.75] | **0.11±0.02** **[-5.09]** | Putative mitochondrial processing peptidase; Arabidopsis; **PrF** | BAE98412.1 | **Q42290** | At3g02090 | 51.5 | 5.71 | 80 | 5.79 | 833; 1.38 | 26 | 17; 42 |
| 13 | 0.36±0.14 | 0.47±0.09 [+1.30] | **0.19±0.04** **[-1.89]** | ATPase subunit 1; *Brassica napus*; **RC** | YP_717155.1 | **Q6YSN4** | AtMg01190 | 55.4 | 6.01 | 58 | 6.07 | 3195; 1.12 | 23 | 76; 168 |
| 14 | 0.35±0.14 | 0.22±0.04 [-1.59] | **0.08±0.03** **[-4.37]** | -1- pyrroline-5-carboxylate dehydrogenase precursor; Arabidopsis; **AM** | AAK73756.1 | Q8VZC3 | At5g62530 | 62.2 | 6.26 | 70 | 6.24 | 784; 0.67 | 18 | 3; 41 |
| 15 | 0.54±0.06 | **0.33±0.06 [-1.64]** | **0.09±0.01 [-6.00]** |  -1- pyrroline-5-carboxylate dehydrogenase precursor; Arabidopsis; **AM** | AAK73756.1 | Q8VZC3 | At5g62530 | 62.2 | 6.26 | 69 | 6.33 | 1622; 0.95 | 21 | 0; 78 |
| 16 | 0.60±0.14 | 0.77±0.11 [+1.28] | **0.31±0.05** **[-1.93]** | Mitochondrial elongation factor Tu; Arabidopsis; **PrS** | CAA61511.1 | **Q9ZT91** | At4g02930 | 51.6 | 5.53 | 42 | 6.00 | 3123; 2.45 | 37 | 24; 100 |
| 17 | 0.31±0.08 | **0.42±0.07** **[+1.35]** | 0.18±0.04 [-1.72] | Mitochondrial elongation factor Tu; Arabidopsis; **PrS** | CAA61511.1 | **Q9ZT91** | At4g02930 | 51.6 | 5.53 | 42 | 6.19 | 2502; 2.05 | 33 | 35; 77 |
| 18 | 0.58±0.15 | 0.52±0.07 [-1.11] | **0.14±0.02** **[-4.14]** | Isocitrate dehydrogenase-like protein; Arabidopsis; **CM** | CAB87626.1 | **Q9LYK1** | At5g14590 | 52.3 | 7.11 | 45 | 6.37 | 697; 0.96 | 23 | 14; 23 |
| 19 | 0.26±0.06 | **0.17±0.03 [-1.53]** | **0.11±0.01 [-2.36]** | Citrate synthase (SI); Arabidopsis; **CM** | NP_850415.1 | P20115 | At2g44350 | 53.1 | 6.41 | 48 | 6.57 | 999; 0.62 | 18 | 34; 40 |
| 20 | 0.40±0.09 | **0.23±0.07 [-1.74]** | **0.15±0.01 [-2.67]** | Citrate synthase (SI); Arabidopsis: **CM** | NP_850415.1 | P20115 | At2g44350 | 53.1 | 6.41 | 47 | 6.83 | 2126; 0.83 | 21 | 51; 84 |
| 21 | 0.08±0.06 | 0.16±0.08 [+2.00] | **0.61±0.08** **[+7.62]** | 10 kDa chaperonin; Arabidopsis; **PrF** | NP_563961.1 | **P34893** | At1g14980 | 10.8 | 6.74 | 19 | 9.38 | 107; 1.30 | 31 | 8; 8 |
| 22 | LAf | **0.80±0.20** | **0.53±0.01** | ATP synthase, d chain, mitochondrial; Arabidopsis; **RC** | NP_190798.1 | Q9FT52 | At3g52300 | 19.6 | 5.09 | 20 | 4.59 | 979; 1.60 | 25 | 18; 39 |
