# Supplementary material for: Cold and Heat Stress Diversely Alters Both Cauliflower Respiration and Distinct Mitochondrial Proteins Including OXPHOS Components and Matrix Enzymes
Source: Preprints.org preprint supplement (doi:10.20944/preprints201801.0280.v1), 2018-01-30
Supplement: Supplementary file 3 [file Table S2.xls]

## Sheet:  Table S2
Spot no.	Start a	End a	Observed b	Mr(expt) c	Mr(calc) d	ppm e	M f	Score g	Treshold h	Expect i	Rank j	U k	Peptide l	Peptide sequence no.
1	80	89	492.7890	983.5635	983.5651	-1.66	0	65	42	0.00022	1		K.GELLVGTPAK.R	20
	80	89	492.7891	983.5636	983.5651	-1.60	0	57		0.0015	1		K.GELLVGTPAK.R
	80	89	492.7891	983.5636	983.5651	-1.54	0	60		0.00074	1		K.GELLVGTPAK.R
	80	89	492.7891	983.5637	983.5651	-1.48	0	57		0.0015	1		K.GELLVGTPAK.R
	80	90	570.8405	1139.6665	1139.6662	0.21	1	52		0.0029	1		K.GELLVGTPAKR.Q
	91	104	739.3851	1476.7556	1476.7573	-1.13	0	88		2.2e-06	1	U	R.QAVTNPTNTIFGSK.R
	91	104	739.3851	1476.7557	1476.7573	-1.05	0	88		2.2e-06	1	U	R.QAVTNPTNTIFGSK.R
	91	104	739.3854	1476.7562	1476.7573	-0.71	0	102		9.1e-08	1	U	R.QAVTNPTNTIFGSK.R
	130	143	728.8430	1455.6714	1455.6742	-1.97	0	73		4.7e-05	1	U	K.APNGDAWVEANGQK.F
	130	143	728.8436	1455.6727	1455.6742	-1.05	0	78		1.3e-05	1	U	K.APNGDAWVEANGQK.F
	130	143	728.8438	1455.6729	1455.6742	-0.89	0	67		0.00018	1	U	K.APNGDAWVEANGQK.F
	130	143	728.8438	1455.6731	1455.6742	-0.81	0	82		6.2e-06	1	U	K.APNGDAWVEANGQK.F
	130	143	728.8439	1455.6733	1455.6742	-0.64	0	78		1.3e-05	1	U	K.APNGDAWVEANGQK.F
	130	143	728.8439	1455.6733	1455.6742	-0.64	0	67		0.00018	1	U	K.APNGDAWVEANGQK.F
	130	143	728.8441	1455.6736	1455.6742	-0.46	0	76		2.5e-05	1	U	K.APNGDAWVEANGQK.F
	130	143	728.8444	1455.6743	1455.6742	0.033	0	75		2.5e-05	1	U	K.APNGDAWVEANGQK.F
	144	156	681.3737	1360.7328	1360.7351	-1.69	0	62		0.00075	1	U	K.FSPSQIGANVLTK.M
	144	156	681.3737	1360.7328	1360.7351	-1.69	0	62		0.00073	1	U	K.FSPSQIGANVLTK.M
	144	156	454.5849	1360.7329	1360.7351	-1.61	0	62		0.00077	1	U	K.FSPSQIGANVLTK.M
	144	156	681.3759	1360.7373	1360.7351	1.64	0	59		0.0014	1	U	K.FSPSQIGANVLTK.M
	157	167	628.8113	1255.6081	1255.6118	-2.93	1	49		0.011	1		K.MKETAEAYLGK.S + Oxidation (M)
	157	167	628.8119	1255.6092	1255.6118	-2.05	1	65		0.00032	1		K.MKETAEAYLGK.S + Oxidation (M)
	157	167	628.8121	1255.6096	1255.6118	-1.76	1	75		3.1e-05	1		K.MKETAEAYLGK.S + Oxidation (M)
	157	167	628.8124	1255.6103	1255.6118	-1.17	1	77		1.9e-05	1		K.MKETAEAYLGK.S + Oxidation (M)
	157	167	628.8127	1255.6109	1255.6118	-0.70	1	78		1.7e-05	1		K.MKETAEAYLGK.S + Oxidation (M)
	159	167	491.2471	980.4796	980.4814	-1.89	0	66		0.00028	1		K.ETAEAYLGK.S
	159	167	491.2471	980.4797	980.4814	-1.77	0	71		9.1e-05	1		K.ETAEAYLGK.S
	159	167	491.2477	980.4807	980.4814	-0.71	0	57		0.0024	1		K.ETAEAYLGK.S
	172	185	775.9007	1549.7868	1549.7889	-1.32	0	81		9.6e-06	1		K.AVVTVPAYFNDAQR.Q
	172	185	517.6030	1549.7871	1549.7889	-1.17	0	51		0.0093	1		K.AVVTVPAYFNDAQR.Q
	172	185	775.9010	1549.7874	1549.7889	-0.93	0	79		1.6e-05	1		K.AVVTVPAYFNDAQR.Q
	172	185	775.9011	1549.7876	1549.7889	-0.86	0	73		6e-05	1		K.AVVTVPAYFNDAQR.Q
	172	185	517.6032	1549.7876	1549.7889	-0.82	0	70		0.00012	1		K.AVVTVPAYFNDAQR.Q
	172	185	517.6032	1549.7878	1549.7889	-0.71	0	54		0.005	1		K.AVVTVPAYFNDAQR.Q
	172	185	775.9014	1549.7882	1549.7889	-0.46	0	92		7.3e-07	1		K.AVVTVPAYFNDAQR.Q
	172	185	775.9016	1549.7885	1549.7889	-0.22	0	58		0.0019	1		K.AVVTVPAYFNDAQR.Q
	172	185	517.6035	1549.7887	1549.7889	-0.11	0	65		0.00043	1		K.AVVTVPAYFNDAQR.Q
	172	185	775.9017	1549.7889	1549.7889	0.0084	0	89		1.5e-06	1		K.AVVTVPAYFNDAQR.Q
	194	201	436.2524	870.4902	870.4923	-2.41	0	58		0.0015	1		K.IAGLDVQR.I
	194	201	436.2531	870.4917	870.4923	-0.74	0	58		0.0013	1		K.IAGLDVQR.I
	194	201	436.2531	870.4917	870.4923	-0.74	0	58		0.0013	1		K.IAGLDVQR.I
	202	218	903.9554	1805.8963	1805.8981	-1.00	0	76		2.7e-05	1		R.IINEPTAAALSYGMNNK.E
	202	218	903.9558	1805.8971	1805.8981	-0.59	0	52		0.0075	1		R.IINEPTAAALSYGMNNK.E
	202	218	602.9731	1805.8976	1805.8981	-0.30	0	79		1.6e-05	1		R.IINEPTAAALSYGMNNK.E
	202	218	903.9565	1805.8984	1805.8981	0.15	0	59		0.0015	1		R.IINEPTAAALSYGMNNK.E
	202	218	903.9566	1805.8986	1805.8981	0.29	0	92		6.9e-07	1		R.IINEPTAAALSYGMNNK.E
	202	218	903.9568	1805.8990	1805.8981	0.50	0	93		6.1e-07	1		R.IINEPTAAALSYGMNNK.E
	202	218	608.3042	1821.8908	1821.8931	-1.25	0	59		0.0015	1		R.IINEPTAAALSYGMNNK.E + Oxidation (M)
	202	218	911.9531	1821.8917	1821.8931	-0.74	0	60		0.0011	1		R.IINEPTAAALSYGMNNK.E + Oxidation (M)
	202	218	608.3047	1821.8922	1821.8931	-0.44	0	55		0.0037	1		R.IINEPTAAALSYGMNNK.E + Oxidation (M)
	202	218	911.9536	1821.8927	1821.8931	-0.21	0	54		0.0049	1		R.IINEPTAAALSYGMNNK.E + Oxidation (M)
	202	218	911.9537	1821.8928	1821.8931	-0.14	0	62		0.00071	1		R.IINEPTAAALSYGMNNK.E + Oxidation (M)
	202	218	911.9551	1821.8957	1821.8931	1.47	0	53		0.0055	1		R.IINEPTAAALSYGMNNK.E + Oxidation (M)
	274	282	531.2823	1060.5500	1060.5513	-1.17	1	63		0.00079	1	U	K.RSDNIDLTK.D
	274	282	531.2825	1060.5505	1060.5513	-0.72	1	63		0.00082	1	U	K.RSDNIDLTK.D
	274	282	531.2826	1060.5506	1060.5513	-0.61	1	63		0.00083	1	U	K.RSDNIDLTK.D
	275	282	453.2315	904.4485	904.4502	-1.81	0	46		0.041	1	U	R.SDNIDLTK.D
	275	282	453.2319	904.4492	904.4502	-1.01	0	46		0.042	1	U	R.SDNIDLTK.D
	275	282	453.2320	904.4495	904.4502	-0.73	0	78		2.7e-05	1	U	R.SDNIDLTK.D
	299	322	836.4337	2506.2793	2506.2802	-0.36	0	57		0.0019	1	U	K.IELSSTTQTEINLPFITADASGAK.H
	361	373	709.3696	1416.7247	1416.7283	-2.51	0	53		0.0071	1		K.EVDEVLLVGGMTR.V
	361	373	709.3702	1416.7258	1416.7283	-1.74	0	54		0.0049	1		K.EVDEVLLVGGMTR.V
	361	373	709.3705	1416.7265	1416.7283	-1.23	0	49		0.019	1		K.EVDEVLLVGGMTR.V
	361	373	709.3708	1416.7270	1416.7283	-0.88	0	47		0.025	1		K.EVDEVLLVGGMTR.V
	361	373	709.3709	1416.7271	1416.7283	-0.79	0	49		0.018	1		K.EVDEVLLVGGMTR.V
	361	373	709.3710	1416.7274	1416.7283	-0.62	0	52		0.0093	1		K.EVDEVLLVGGMTR.V
	361	373	709.3711	1416.7276	1416.7283	-0.45	0	52		0.0086	1		K.EVDEVLLVGGMTR.V
	361	373	709.3713	1416.7280	1416.7283	-0.19	0	60		0.0013	1		K.EVDEVLLVGGMTR.V
	361	373	709.3719	1416.7292	1416.7283	0.68	0	57		0.0025	1		K.EVDEVLLVGGMTR.V
	361	373	709.3721	1416.7297	1416.7283	1.01	0	55		0.0045	1		K.EVDEVLLVGGMTR.V
	361	373	717.3684	1432.7223	1432.7232	-0.64	0	59		0.0022	1		K.EVDEVLLVGGMTR.V + Oxidation (M)
	361	373	717.3690	1432.7234	1432.7232	0.12	0	51		0.012	1		K.EVDEVLLVGGMTR.V + Oxidation (M)
	361	373	717.3690	1432.7235	1432.7232	0.21	0	52		0.0095	1		K.EVDEVLLVGGMTR.V + Oxidation (M)
	361	373	717.3691	1432.7236	1432.7232	0.29	0	47		0.029	1		K.EVDEVLLVGGMTR.V + Oxidation (M)
	361	373	717.3691	1432.7236	1432.7232	0.29	0	59		0.0019	1		K.EVDEVLLVGGMTR.V + Oxidation (M)
	361	373	717.3693	1432.7240	1432.7232	0.54	0	47		0.028	1		K.EVDEVLLVGGMTR.V + Oxidation (M)
	361	373	717.3708	1432.7270	1432.7232	2.68	0	51		0.011	1		K.EVDEVLLVGGMTR.V + Oxidation (M)
	361	373	717.3711	1432.7277	1432.7232	3.18	0	48		0.025	1		K.EVDEVLLVGGMTR.V + Oxidation (M)
	392	411	970.0066	1937.9986	1937.9993	-0.34	0	82		7e-06	1		K.GVNPDEAVAMGAAIQGGILR.G
	392	411	647.0071	1937.9996	1937.9993	0.16	0	86		2.4e-06	1		K.GVNPDEAVAMGAAIQGGILR.G
	392	411	647.0073	1938.0000	1937.9993	0.35	0	78		1.5e-05	1		K.GVNPDEAVAMGAAIQGGILR.G
	392	411	970.0076	1938.0006	1937.9993	0.67	0	90		1.1e-06	1		K.GVNPDEAVAMGAAIQGGILR.G
	392	411	970.0077	1938.0008	1937.9993	0.80	0	85		3.4e-06	1		K.GVNPDEAVAMGAAIQGGILR.G
	392	411	970.0120	1938.0094	1937.9993	5.20	0	83		4.9e-06	1		K.GVNPDEAVAMGAAIQGGILR.G
	392	411	978.0032	1953.9918	1953.9942	-1.24	0	92		7.6e-07	1		K.GVNPDEAVAMGAAIQGGILR.G + Oxidation (M)
	392	411	978.0032	1953.9919	1953.9942	-1.17	0	77		2e-05	1		K.GVNPDEAVAMGAAIQGGILR.G + Oxidation (M)
	392	411	978.0035	1953.9925	1953.9942	-0.86	0	93		5.6e-07	1		K.GVNPDEAVAMGAAIQGGILR.G + Oxidation (M)
	392	411	652.3382	1953.9928	1953.9942	-0.73	0	66		0.00031	1		K.GVNPDEAVAMGAAIQGGILR.G + Oxidation (M)
	392	411	652.3382	1953.9928	1953.9942	-0.73	0	61		0.0008	1		K.GVNPDEAVAMGAAIQGGILR.G + Oxidation (M)
	392	411	652.3382	1953.9928	1953.9942	-0.73	0	49		0.013	1		K.GVNPDEAVAMGAAIQGGILR.G + Oxidation (M)
	392	411	652.3386	1953.9939	1953.9942	-0.18	0	61		0.00094	1		K.GVNPDEAVAMGAAIQGGILR.G + Oxidation (M)
	392	411	652.3386	1953.9939	1953.9942	-0.18	0	72		6.5e-05	1		K.GVNPDEAVAMGAAIQGGILR.G + Oxidation (M)
	392	411	978.0045	1953.9944	1953.9942	0.085	0	91		8.1e-07	1		K.GVNPDEAVAMGAAIQGGILR.G + Oxidation (M)
	392	411	978.0045	1953.9945	1953.9942	0.15	0	87		2.3e-06	1		K.GVNPDEAVAMGAAIQGGILR.G + Oxidation (M)
	392	411	652.3409	1954.0008	1953.9942	3.38	0	62		0.00063	1		K.GVNPDEAVAMGAAIQGGILR.G + Oxidation (M)
	392	411	978.0106	1954.0067	1953.9942	6.39	0	55		0.0032	1		K.GVNPDEAVAMGAAIQGGILR.G + Oxidation (M)
	443	449	387.7205	773.4264	773.4283	-2.52	0	49		0.03	1		R.NTTIPTK.K
	443	449	387.7205	773.4265	773.4283	-2.36	0	49		0.03	1		R.NTTIPTK.K
	450	467	656.6653	1966.9742	1966.9782	-2.05	1	119		1.3e-09	1	U	K.KSQVFSTAADNQMQVGIK.V + Oxidation (M)
	450	467	984.4945	1966.9745	1966.9782	-1.91	1	95		3.4e-07	1	U	K.KSQVFSTAADNQMQVGIK.V + Oxidation (M)
	450	467	656.6663	1966.9770	1966.9782	-0.65	1	115		3.5e-09	1	U	K.KSQVFSTAADNQMQVGIK.V + Oxidation (M)
	450	467	656.6663	1966.9771	1966.9782	-0.56	1	100		9.9e-08	1	U	K.KSQVFSTAADNQMQVGIK.V + Oxidation (M)
	450	467	656.6663	1966.9771	1966.9782	-0.56	1	89		1.4e-06	1	U	K.KSQVFSTAADNQMQVGIK.V + Oxidation (M)
	451	467	912.4470	1822.8795	1822.8884	-4.86	0	75		3.7e-05	1	U	K.SQVFSTAADNQMQVGIK.V
	451	467	608.6354	1822.8845	1822.8884	-2.12	0	73		5.7e-05	1	U	K.SQVFSTAADNQMQVGIK.V
	451	467	912.4498	1822.8850	1822.8884	-1.84	0	97		2.1e-07	1	U	K.SQVFSTAADNQMQVGIK.V
	451	467	912.4506	1822.8867	1822.8884	-0.91	0	70		0.0001	1	U	K.SQVFSTAADNQMQVGIK.V
	451	467	912.4516	1822.8886	1822.8884	0.16	0	98		2e-07	1	U	K.SQVFSTAADNQMQVGIK.V
	451	467	920.4471	1838.8797	1838.8833	-1.93	0	85		3.3e-06	1	U	K.SQVFSTAADNQMQVGIK.V + Oxidation (M)
	451	467	613.9673	1838.8800	1838.8833	-1.76	0	104		3.9e-08	1	U	K.SQVFSTAADNQMQVGIK.V + Oxidation (M)
	451	467	920.4474	1838.8802	1838.8833	-1.65	0	111		8.8e-09	1	U	K.SQVFSTAADNQMQVGIK.V + Oxidation (M)
	451	467	613.9674	1838.8804	1838.8833	-1.56	0	104		3.9e-08	1	U	K.SQVFSTAADNQMQVGIK.V + Oxidation (M)
	451	467	920.4476	1838.8806	1838.8833	-1.46	0	73		5.6e-05	1	U	K.SQVFSTAADNQMQVGIK.V + Oxidation (M)
	451	467	920.4476	1838.8807	1838.8833	-1.39	0	85		3.2e-06	1	U	K.SQVFSTAADNQMQVGIK.V + Oxidation (M)
	451	467	920.4476	1838.8807	1838.8833	-1.39	0	111		8.7e-09	1	U	K.SQVFSTAADNQMQVGIK.V + Oxidation (M)
	451	467	920.4479	1838.8813	1838.8833	-1.06	0	64		0.00038	1	U	K.SQVFSTAADNQMQVGIK.V + Oxidation (M)
	451	467	920.4481	1838.8816	1838.8833	-0.93	0	106		2.4e-08	1	U	K.SQVFSTAADNQMQVGIK.V + Oxidation (M)
	451	467	920.4482	1838.8818	1838.8833	-0.80	0	73		5.7e-05	1	U	K.SQVFSTAADNQMQVGIK.V + Oxidation (M)
	451	467	920.4482	1838.8819	1838.8833	-0.73	0	50		0.011	1	U	K.SQVFSTAADNQMQVGIK.V + Oxidation (M)
	451	467	920.4487	1838.8828	1838.8833	-0.26	0	81		9e-06	1	U	K.SQVFSTAADNQMQVGIK.V + Oxidation (M)
	531	542	625.2853	1248.5560	1248.5582	-1.77	0	109		8.2e-09	1	U	R.SSGGLSDDEINR.M
	531	542	625.2855	1248.5564	1248.5582	-1.48	0	94		2.6e-07	1	U	R.SSGGLSDDEINR.M
	531	542	625.2857	1248.5569	1248.5582	-1.08	0	109		8.3e-09	1	U	R.SSGGLSDDEINR.M
	531	542	625.2858	1248.5570	1248.5582	-0.98	0	109		8.2e-09	1	U	R.SSGGLSDDEINR.M
	531	542	625.2859	1248.5572	1248.5582	-0.79	0	94		2.6e-07	1	U	R.SSGGLSDDEINR.M
	531	542	625.2864	1248.5582	1248.5582	-0.0032	0	94		2.6e-07	1	U	R.SSGGLSDDEINR.M
	585	601	907.4811	1812.9476	1812.9469	0.41	0	101		7.3e-08	1	U	K.IPAEIASEIETAVSDLR.T
	585	601	605.3233	1812.9481	1812.9469	0.66	0	53		0.0053	1	U	K.IPAEIASEIETAVSDLR.T
	585	601	605.3234	1812.9483	1812.9469	0.76	0	44		0.038	1	U	K.IPAEIASEIETAVSDLR.T
2	40	55	853.3815	1704.7485	1704.7512	-1.58	0	65	42	0.00018	1		R.DALNSAIDEEMSADPK.V	8
	40	55	853.3816	1704.7486	1704.7512	-1.51	0	71		4.8e-05	1		R.DALNSAIDEEMSADPK.V
	40	55	853.3817	1704.7489	1704.7512	-1.37	0	66		0.00013	1		R.DALNSAIDEEMSADPK.V
	40	55	853.3823	1704.7501	1704.7512	-0.66	0	70		6.3e-05	1		R.DALNSAIDEEMSADPK.V
	40	55	853.3824	1704.7503	1704.7512	-0.50	0	55		0.002	1		R.DALNSAIDEEMSADPK.V
	40	55	853.3827	1704.7508	1704.7512	-0.22	0	70		5.5e-05	1		R.DALNSAIDEEMSADPK.V
	40	55	853.3831	1704.7516	1704.7512	0.21	0	54		0.0021	1		R.DALNSAIDEEMSADPK.V
	40	55	853.3831	1704.7517	1704.7512	0.28	0	46		0.016	1		R.DALNSAIDEEMSADPK.V
	40	55	853.3832	1704.7519	1704.7512	0.42	0	59		0.00079	1		R.DALNSAIDEEMSADPK.V
	40	55	853.3837	1704.7529	1704.7512	1.00	0	55		0.0019	1		R.DALNSAIDEEMSADPK.V
	40	55	853.3879	1704.7612	1704.7512	5.87	0	43		0.033	1		R.DALNSAIDEEMSADPK.V
	40	55	861.3782	1720.7418	1720.7461	-2.52	0	63		0.00022	1		R.DALNSAIDEEMSADPK.V + Oxidation (M)
	40	55	861.3783	1720.7420	1720.7461	-2.37	0	52		0.0026	1		R.DALNSAIDEEMSADPK.V + Oxidation (M)
	40	55	861.3784	1720.7422	1720.7461	-2.30	0	67		9.8e-05	1		R.DALNSAIDEEMSADPK.V + Oxidation (M)
	40	55	574.5883	1720.7431	1720.7461	-1.74	0	59		0.0006	1		R.DALNSAIDEEMSADPK.V + Oxidation (M)
	40	55	574.5884	1720.7435	1720.7461	-1.53	0	61		0.00038	1		R.DALNSAIDEEMSADPK.V + Oxidation (M)
	40	55	574.5884	1720.7435	1720.7461	-1.53	0	56		0.0012	1		R.DALNSAIDEEMSADPK.V + Oxidation (M)
	40	55	861.3790	1720.7435	1720.7461	-1.52	0	61		0.00034	1		R.DALNSAIDEEMSADPK.V + Oxidation (M)
	40	55	861.3791	1720.7436	1720.7461	-1.45	0	75		1.4e-05	1		R.DALNSAIDEEMSADPK.V + Oxidation (M)
	40	55	861.3791	1720.7436	1720.7461	-1.45	0	65		0.00015	1		R.DALNSAIDEEMSADPK.V + Oxidation (M)
	40	55	861.3791	1720.7437	1720.7461	-1.38	0	65		0.00015	1		R.DALNSAIDEEMSADPK.V + Oxidation (M)
	40	55	861.3796	1720.7446	1720.7461	-0.88	0	44		0.019	1		R.DALNSAIDEEMSADPK.V + Oxidation (M)
	40	55	861.3796	1720.7447	1720.7461	-0.81	0	42		0.027	1		R.DALNSAIDEEMSADPK.V + Oxidation (M)
	40	55	861.3796	1720.7447	1720.7461	-0.81	0	57		0.00096	1		R.DALNSAIDEEMSADPK.V + Oxidation (M)
	40	55	861.3797	1720.7448	1720.7461	-0.74	0	64		0.00017	1		R.DALNSAIDEEMSADPK.V + Oxidation (M)
	40	55	861.3798	1720.7450	1720.7461	-0.67	0	58		0.00069	1		R.DALNSAIDEEMSADPK.V + Oxidation (M)
	40	55	861.3800	1720.7454	1720.7461	-0.39	0	53		0.0024	1		R.DALNSAIDEEMSADPK.V + Oxidation (M)
	40	55	861.3817	1720.7487	1720.7461	1.52	0	45		0.015	1		R.DALNSAIDEEMSADPK.V + Oxidation (M)
	56	71	902.9275	1803.8405	1803.8502	-5.34	0	67		0.00017	1	U	K.VFVMGEEVGQYQGAYK.I
	56	71	902.9310	1803.8474	1803.8502	-1.54	0	91		7.3e-07	1	U	K.VFVMGEEVGQYQGAYK.I
	56	71	902.9313	1803.8480	1803.8502	-1.21	0	60		0.0009	1	U	K.VFVMGEEVGQYQGAYK.I
	56	71	902.9313	1803.8481	1803.8502	-1.13	0	91		7.2e-07	1	U	K.VFVMGEEVGQYQGAYK.I
	56	71	902.9315	1803.8485	1803.8502	-0.93	0	79		1.3e-05	1	U	K.VFVMGEEVGQYQGAYK.I
	56	71	902.9320	1803.8495	1803.8502	-0.39	0	105		3.5e-08	1	U	K.VFVMGEEVGQYQGAYK.I
	56	71	910.9241	1819.8336	1819.8451	-6.32	0	54		0.0029	1	U	K.VFVMGEEVGQYQGAYK.I + Oxidation (M)
	56	71	910.9243	1819.8341	1819.8451	-6.05	0	50		0.0095	1	U	K.VFVMGEEVGQYQGAYK.I + Oxidation (M)
	56	71	910.9255	1819.8364	1819.8451	-4.77	0	71		7.6e-05	1	U	K.VFVMGEEVGQYQGAYK.I + Oxidation (M)
	56	71	910.9258	1819.8370	1819.8451	-4.44	0	66		0.00023	1	U	K.VFVMGEEVGQYQGAYK.I + Oxidation (M)
	56	71	910.9270	1819.8394	1819.8451	-3.10	0	78		1.4e-05	1	U	K.VFVMGEEVGQYQGAYK.I + Oxidation (M)
	56	71	910.9272	1819.8399	1819.8451	-2.83	0	64		0.00039	1	U	K.VFVMGEEVGQYQGAYK.I + Oxidation (M)
	56	71	910.9275	1819.8404	1819.8451	-2.56	0	60		0.0008	1	U	K.VFVMGEEVGQYQGAYK.I + Oxidation (M)
	56	71	910.9279	1819.8412	1819.8451	-2.16	0	62		0.00063	1	U	K.VFVMGEEVGQYQGAYK.I + Oxidation (M)
	56	71	910.9284	1819.8423	1819.8451	-1.55	0	94		3.4e-07	1	U	K.VFVMGEEVGQYQGAYK.I + Oxidation (M)
	56	71	910.9286	1819.8426	1819.8451	-1.35	0	91		7e-07	1	U	K.VFVMGEEVGQYQGAYK.I + Oxidation (M)
	56	71	607.6215	1819.8427	1819.8451	-1.30	0	71		7.3e-05	1	U	K.VFVMGEEVGQYQGAYK.I + Oxidation (M)
	56	71	910.9287	1819.8429	1819.8451	-1.22	0	60		0.00097	1	U	K.VFVMGEEVGQYQGAYK.I + Oxidation (M)
	56	71	607.6216	1819.8429	1819.8451	-1.20	0	71		8e-05	1	U	K.VFVMGEEVGQYQGAYK.I + Oxidation (M)
	56	71	607.6220	1819.8442	1819.8451	-0.49	0	59		0.0011	1	U	K.VFVMGEEVGQYQGAYK.I + Oxidation (M)
	56	71	910.9294	1819.8442	1819.8451	-0.49	0	76		2.5e-05	1	U	K.VFVMGEEVGQYQGAYK.I + Oxidation (M)
	56	71	910.9317	1819.8488	1819.8451	2.06	0	69		0.00012	1	U	K.VFVMGEEVGQYQGAYK.I + Oxidation (M)
	133	148	898.4625	1794.9105	1794.9087	1.01	0	78		1.7e-05	1		K.SNYMSAGQINVPIVFR.G
	133	148	898.4629	1794.9112	1794.9087	1.42	0	59		0.0014	1		K.SNYMSAGQINVPIVFR.G
	133	148	599.3110	1794.9113	1794.9087	1.46	0	64		0.00048	1		K.SNYMSAGQINVPIVFR.G
	133	148	898.4629	1794.9113	1794.9087	1.49	0	44		0.046	1		K.SNYMSAGQINVPIVFR.G
	133	148	906.4516	1810.8886	1810.9036	-8.25	0	70		9.6e-05	1		K.SNYMSAGQINVPIVFR.G + Oxidation (M)
	133	148	906.4528	1810.8910	1810.9036	-6.97	0	102		7.1e-08	1		K.SNYMSAGQINVPIVFR.G + Oxidation (M)
	133	148	906.4530	1810.8914	1810.9036	-6.71	0	69		0.00015	1		K.SNYMSAGQINVPIVFR.G + Oxidation (M)
	133	148	906.4551	1810.8956	1810.9036	-4.41	0	83		5.1e-06	1		K.SNYMSAGQINVPIVFR.G + Oxidation (M)
	133	148	906.4554	1810.8962	1810.9036	-4.08	0	86		2.7e-06	1		K.SNYMSAGQINVPIVFR.G + Oxidation (M)
	133	148	906.4561	1810.8975	1810.9036	-3.34	0	52		0.0074	1		K.SNYMSAGQINVPIVFR.G + Oxidation (M)
	133	148	906.4565	1810.8984	1810.9036	-2.86	0	71		8.2e-05	1		K.SNYMSAGQINVPIVFR.G + Oxidation (M)
	133	148	906.4566	1810.8986	1810.9036	-2.73	0	84		4.5e-06	1		K.SNYMSAGQINVPIVFR.G + Oxidation (M)
	133	148	906.4572	1810.8999	1810.9036	-2.06	0	80		1.1e-05	1		K.SNYMSAGQINVPIVFR.G + Oxidation (M)
	133	148	906.4573	1810.9001	1810.9036	-1.91	0	84		4.3e-06	1		K.SNYMSAGQINVPIVFR.G + Oxidation (M)
	133	148	906.4581	1810.9016	1810.9036	-1.11	0	64		0.00044	1		K.SNYMSAGQINVPIVFR.G + Oxidation (M)
	133	148	906.4582	1810.9018	1810.9036	-0.98	0	78		1.8e-05	1		K.SNYMSAGQINVPIVFR.G + Oxidation (M)
	133	148	604.6412	1810.9019	1810.9036	-0.94	0	58		0.0016	1		K.SNYMSAGQINVPIVFR.G + Oxidation (M)
	133	148	906.4584	1810.9022	1810.9036	-0.78	0	56		0.0025	1		K.SNYMSAGQINVPIVFR.G + Oxidation (M)
	133	148	906.4584	1810.9023	1810.9036	-0.70	0	90		1.2e-06	1		K.SNYMSAGQINVPIVFR.G + Oxidation (M)
	133	148	906.4586	1810.9027	1810.9036	-0.50	0	82		6.6e-06	1		K.SNYMSAGQINVPIVFR.G + Oxidation (M)
	133	148	906.4588	1810.9030	1810.9036	-0.30	0	85		3.7e-06	1		K.SNYMSAGQINVPIVFR.G + Oxidation (M)
	133	148	906.4589	1810.9032	1810.9036	-0.24	0	77		2e-05	1		K.SNYMSAGQINVPIVFR.G + Oxidation (M)
	133	148	604.6419	1810.9039	1810.9036	0.17	0	79		1.5e-05	1		K.SNYMSAGQINVPIVFR.G + Oxidation (M)
	133	148	604.6429	1810.9068	1810.9036	1.78	0	52		0.0074	1		K.SNYMSAGQINVPIVFR.G + Oxidation (M)
	133	148	906.4622	1810.9099	1810.9036	3.48	0	86		2.6e-06	1		K.SNYMSAGQINVPIVFR.G + Oxidation (M)
	177	187	596.3022	1190.5899	1190.5931	-2.67	0	82		8.6e-06	1	U	K.VLAPYSAEDAR.G
	177	187	596.3027	1190.5909	1190.5931	-1.86	0	82		8.2e-06	1	U	K.VLAPYSAEDAR.G
	177	187	596.3029	1190.5912	1190.5931	-1.64	0	82		8.3e-06	1	U	K.VLAPYSAEDAR.G
	177	187	596.3033	1190.5921	1190.5931	-0.84	0	80		1.5e-05	1	U	K.VLAPYSAEDAR.G
	177	187	596.3036	1190.5927	1190.5931	-0.32	0	82		8.5e-06	1	U	K.VLAPYSAEDAR.G
	259	272	757.4106	1512.8066	1512.8147	-5.37	0	95		2.9e-07	1	U	K.LAEEGISAEVINLR.S
	259	272	757.4109	1512.8072	1512.8147	-4.96	0	91		7.7e-07	1	U	K.LAEEGISAEVINLR.S
	259	272	757.4109	1512.8072	1512.8147	-4.96	0	71		6.9e-05	1	U	K.LAEEGISAEVINLR.S
	259	272	757.4112	1512.8079	1512.8147	-4.48	0	72		6.7e-05	1	U	K.LAEEGISAEVINLR.S
	259	272	757.4116	1512.8086	1512.8147	-4.07	0	95		2.9e-07	1	U	K.LAEEGISAEVINLR.S
	259	272	505.2769	1512.8088	1512.8147	-3.89	0	46		0.026	1	U	K.LAEEGISAEVINLR.S
	259	272	757.4118	1512.8090	1512.8147	-3.75	0	78		1.4e-05	1	U	K.LAEEGISAEVINLR.S
	259	272	757.4119	1512.8092	1512.8147	-3.66	0	80		1e-05	1	U	K.LAEEGISAEVINLR.S
	259	272	757.4122	1512.8098	1512.8147	-3.27	0	91		8.1e-07	1	U	K.LAEEGISAEVINLR.S
	259	272	757.4125	1512.8105	1512.8147	-2.78	0	93		4.9e-07	1	U	K.LAEEGISAEVINLR.S
	259	272	757.4128	1512.8111	1512.8147	-2.38	0	71		7.5e-05	1	U	K.LAEEGISAEVINLR.S
	259	272	757.4128	1512.8111	1512.8147	-2.38	0	79		1.2e-05	1	U	K.LAEEGISAEVINLR.S
	259	272	757.4128	1512.8111	1512.8147	-2.38	0	102		5.4e-08	1	U	K.LAEEGISAEVINLR.S
	259	272	757.4131	1512.8117	1512.8147	-1.97	0	72		6.5e-05	1	U	K.LAEEGISAEVINLR.S
	259	272	757.4132	1512.8119	1512.8147	-1.89	0	90		9e-07	1	U	K.LAEEGISAEVINLR.S
	259	272	505.2780	1512.8122	1512.8147	-1.65	0	53		0.0047	1	U	K.LAEEGISAEVINLR.S
	259	272	757.4135	1512.8125	1512.8147	-1.49	0	97		1.8e-07	1	U	K.LAEEGISAEVINLR.S
	259	272	505.2781	1512.8125	1512.8147	-1.47	0	61		0.00068	1	U	K.LAEEGISAEVINLR.S
	259	272	505.2782	1512.8127	1512.8147	-1.35	0	66		0.00022	1	U	K.LAEEGISAEVINLR.S
	259	272	757.4137	1512.8128	1512.8147	-1.24	0	89		1.2e-06	1	U	K.LAEEGISAEVINLR.S
	259	272	757.4139	1512.8133	1512.8147	-0.93	0	95		3.2e-07	1	U	K.LAEEGISAEVINLR.S
	259	272	505.2785	1512.8138	1512.8147	-0.64	0	54		0.0034	1	U	K.LAEEGISAEVINLR.S
	259	272	757.4142	1512.8138	1512.8147	-0.61	0	92		6e-07	1	U	K.LAEEGISAEVINLR.S
	259	272	757.4143	1512.8139	1512.8147	-0.52	0	96		2e-07	1	U	K.LAEEGISAEVINLR.S
	259	272	757.4144	1512.8142	1512.8147	-0.36	0	85		3.1e-06	1	U	K.LAEEGISAEVINLR.S
	259	272	757.4145	1512.8144	1512.8147	-0.20	0	91		7.2e-07	1	U	K.LAEEGISAEVINLR.S
	259	272	757.4145	1512.8145	1512.8147	-0.12	0	102		6.4e-08	1	U	K.LAEEGISAEVINLR.S
	259	272	757.4145	1512.8145	1512.8147	-0.12	0	89		1.1e-06	1	U	K.LAEEGISAEVINLR.S
	259	272	757.4147	1512.8148	1512.8147	0.040	0	85		2.7e-06	1	U	K.LAEEGISAEVINLR.S
	259	272	757.4147	1512.8149	1512.8147	0.12	0	88		1.5e-06	1	U	K.LAEEGISAEVINLR.S
	259	272	757.4155	1512.8164	1512.8147	1.10	0	82		6.4e-06	1	U	K.LAEEGISAEVINLR.S
	259	272	757.4162	1512.8178	1512.8147	2.06	0	90		8.5e-07	1	U	K.LAEEGISAEVINLR.S
	259	272	757.4169	1512.8193	1512.8147	3.03	0	60		0.00092	1	U	K.LAEEGISAEVINLR.S
	259	272	757.4172	1512.8199	1512.8147	3.44	0	83		4.8e-06	1	U	K.LAEEGISAEVINLR.S
	259	272	757.4176	1512.8206	1512.8147	3.91	0	79		1.2e-05	1	U	K.LAEEGISAEVINLR.S
	259	272	757.4186	1512.8227	1512.8147	5.29	0	77		1.7e-05	1	U	K.LAEEGISAEVINLR.S
	259	272	757.4188	1512.8231	1512.8147	5.53	0	92		5.7e-07	1	U	K.LAEEGISAEVINLR.S
	259	272	757.4189	1512.8233	1512.8147	5.70	0	62		0.00054	1	U	K.LAEEGISAEVINLR.S
	259	272	757.4193	1512.8239	1512.8147	6.09	0	81		7.5e-06	1	U	K.LAEEGISAEVINLR.S
	280	287	416.2368	830.4590	830.4610	-2.45	0	49		0.026	1		R.ATINASVR.K
	280	287	416.2368	830.4591	830.4610	-2.30	0	56		0.0055	1		R.ATINASVR.K
	280	287	416.2368	830.4591	830.4610	-2.30	0	51		0.016	1		R.ATINASVR.K
	280	287	416.2369	830.4591	830.4610	-2.23	0	47		0.044	1		R.ATINASVR.K
	280	287	416.2371	830.4596	830.4610	-1.72	0	47		0.044	1		R.ATINASVR.K
	280	287	416.2377	830.4608	830.4610	-0.25	0	47		0.043	1		R.ATINASVR.K
	280	287	416.2377	830.4609	830.4610	-0.11	0	47		0.046	1		R.ATINASVR.K
	280	287	416.2379	830.4613	830.4610	0.35	0	54		0.0092	1		R.ATINASVR.K
	280	287	416.2380	830.4615	830.4610	0.56	0	55		0.0073	1		R.ATINASVR.K
	280	287	416.2381	830.4616	830.4610	0.71	0	47		0.046	1		R.ATINASVR.K
	327	342	844.4262	1686.8377	1686.8399	-1.28	0	67		0.00023	1		R.IAGADVPMPYAANLER.L
	327	342	844.4265	1686.8385	1686.8399	-0.85	0	64		0.00049	1		R.IAGADVPMPYAANLER.L
	327	342	844.4268	1686.8391	1686.8399	-0.48	0	67		0.00024	1		R.IAGADVPMPYAANLER.L
	327	342	844.4301	1686.8455	1686.8399	3.35	0	67		0.00021	1		R.IAGADVPMPYAANLER.L
	327	342	852.4233	1702.8321	1702.8348	-1.58	0	70		0.0001	1		R.IAGADVPMPYAANLER.L + Oxidation (M)
	327	342	852.4235	1702.8324	1702.8348	-1.44	0	72		6.3e-05	1		R.IAGADVPMPYAANLER.L + Oxidation (M)
	327	342	852.4237	1702.8329	1702.8348	-1.15	0	68		0.00019	1		R.IAGADVPMPYAANLER.L + Oxidation (M)
	327	342	852.4239	1702.8333	1702.8348	-0.87	0	64		0.00047	1		R.IAGADVPMPYAANLER.L + Oxidation (M)
	327	342	852.4239	1702.8333	1702.8348	-0.87	0	72		7.1e-05	1		R.IAGADVPMPYAANLER.L + Oxidation (M)
	327	342	852.4241	1702.8336	1702.8348	-0.73	0	61		0.00091	1		R.IAGADVPMPYAANLER.L + Oxidation (M)
	343	353	633.8725	1265.7304	1265.7343	-3.05	0	58		0.00072	1	U	R.LALPQIEDIVR.A
	343	353	633.8725	1265.7304	1265.7343	-3.05	0	46		0.013	1	U	R.LALPQIEDIVR.A
	343	353	633.8726	1265.7306	1265.7343	-2.96	0	62		0.0003	1	U	R.LALPQIEDIVR.A
	343	353	633.8727	1265.7308	1265.7343	-2.77	0	62		0.0003	1	U	R.LALPQIEDIVR.A
	343	353	633.8747	1265.7348	1265.7343	0.41	0	61		0.0003	1	U	R.LALPQIEDIVR.A
	343	353	633.8748	1265.7350	1265.7343	0.52	0	61		0.00031	1	U	R.LALPQIEDIVR.A
	343	353	633.8749	1265.7353	1265.7343	0.80	0	62		0.00029	1	U	R.LALPQIEDIVR.A
3	99	108	580.3257	1158.6368	1158.6431	-5.40	0	45	43	0.04	1		K.ISLCDALIVR.S	15
	99	108	580.3267	1158.6389	1158.6431	-3.61	0	49		0.015	1		K.ISLCDALIVR.S
	99	108	580.3268	1158.6391	1158.6431	-3.40	0	82		8e-06	1		K.ISLCDALIVR.S
	99	108	580.3269	1158.6392	1158.6431	-3.30	0	64		0.00046	1		K.ISLCDALIVR.S
	99	108	580.3270	1158.6394	1158.6431	-3.17	0	83		6.6e-06	1		K.ISLCDALIVR.S
	99	108	580.3271	1158.6396	1158.6431	-2.97	0	83		7.2e-06	1		K.ISLCDALIVR.S
	99	108	580.3271	1158.6396	1158.6431	-2.97	0	73		7.2e-05	1		K.ISLCDALIVR.S
	99	108	580.3271	1158.6397	1158.6431	-2.86	0	50		0.013	1		K.ISLCDALIVR.S
	99	108	580.3274	1158.6402	1158.6431	-2.45	0	83		7.1e-06	1		K.ISLCDALIVR.S
	99	108	580.3274	1158.6403	1158.6431	-2.35	0	83		7.1e-06	1		K.ISLCDALIVR.S
	99	108	580.3275	1158.6405	1158.6431	-2.24	0	59		0.0017	1		K.ISLCDALIVR.S
	99	108	580.3275	1158.6405	1158.6431	-2.24	0	83		7e-06	1		K.ISLCDALIVR.S
	99	108	580.3276	1158.6406	1158.6431	-2.12	0	77		2.8e-05	1		K.ISLCDALIVR.S
	99	108	580.3276	1158.6406	1158.6431	-2.12	0	77		2.7e-05	1		K.ISLCDALIVR.S
	99	108	580.3276	1158.6406	1158.6431	-2.12	0	82		7.3e-06	1		K.ISLCDALIVR.S
	99	108	580.3278	1158.6410	1158.6431	-1.81	0	77		2.8e-05	1		K.ISLCDALIVR.S
	99	108	580.3278	1158.6410	1158.6431	-1.81	0	73		6.4e-05	1		K.ISLCDALIVR.S
	99	108	580.3279	1158.6413	1158.6431	-1.50	0	59		0.0017	1		K.ISLCDALIVR.S
	99	108	580.3279	1158.6413	1158.6431	-1.50	0	77		2.7e-05	1		K.ISLCDALIVR.S
	99	108	580.3280	1158.6414	1158.6431	-1.40	0	82		8.4e-06	1		K.ISLCDALIVR.S
	99	108	580.3281	1158.6416	1158.6431	-1.29	0	60		0.0014	1		K.ISLCDALIVR.S
	99	108	580.3281	1158.6417	1158.6431	-1.17	0	83		7.2e-06	1		K.ISLCDALIVR.S
	99	108	580.3283	1158.6419	1158.6431	-0.96	0	61		0.001	1		K.ISLCDALIVR.S
	99	108	580.3283	1158.6419	1158.6431	-0.96	0	82		8e-06	1		K.ISLCDALIVR.S
	99	108	580.3283	1158.6419	1158.6431	-0.96	0	63		0.00059	1		K.ISLCDALIVR.S
	99	108	580.3283	1158.6419	1158.6431	-0.96	0	82		8.2e-06	1		K.ISLCDALIVR.S
	99	108	580.3283	1158.6421	1158.6431	-0.86	0	64		0.00052	1		K.ISLCDALIVR.S
	99	108	580.3283	1158.6421	1158.6431	-0.86	0	77		2.7e-05	1		K.ISLCDALIVR.S
	99	108	580.3284	1158.6422	1158.6431	-0.76	0	77		2.9e-05	1		K.ISLCDALIVR.S
	99	108	580.3284	1158.6422	1158.6431	-0.76	0	77		2.8e-05	1		K.ISLCDALIVR.S
	99	108	580.3284	1158.6423	1158.6431	-0.65	0	59		0.0016	1		K.ISLCDALIVR.S
	99	108	580.3285	1158.6425	1158.6431	-0.45	0	58		0.0019	1		K.ISLCDALIVR.S
	99	108	580.3286	1158.6427	1158.6431	-0.34	0	77		2.6e-05	1		K.ISLCDALIVR.S
	99	108	580.3287	1158.6428	1158.6431	-0.24	0	58		0.0021	1		K.ISLCDALIVR.S
	99	108	580.3287	1158.6429	1158.6431	-0.12	0	82		7.3e-06	1		K.ISLCDALIVR.S
	99	108	580.3287	1158.6429	1158.6431	-0.12	0	77		2.7e-05	1		K.ISLCDALIVR.S
	99	108	580.3288	1158.6430	1158.6431	-0.016	0	76		3.1e-05	1		K.ISLCDALIVR.S
	99	108	580.3288	1158.6430	1158.6431	-0.016	0	77		2.7e-05	1		K.ISLCDALIVR.S
	99	108	580.3289	1158.6432	1158.6431	0.088	0	65		0.0004	1		K.ISLCDALIVR.S
	99	108	580.3294	1158.6443	1158.6431	1.04	0	77		2.8e-05	1		K.ISLCDALIVR.S
	99	108	580.3299	1158.6452	1158.6431	1.88	0	83		6.9e-06	1		K.ISLCDALIVR.S
	99	108	580.3300	1158.6454	1158.6431	1.99	0	83		6.9e-06	1		K.ISLCDALIVR.S
	175	184	501.7624	1001.5102	1001.5142	-3.99	0	46		0.034	1		R.NVAQADASVK.A
	175	184	501.7629	1001.5112	1001.5142	-2.95	0	53		0.0093	1		R.NVAQADASVK.A
	175	184	501.7630	1001.5115	1001.5142	-2.65	0	49		0.022	1		R.NVAQADASVK.A
	175	184	501.7642	1001.5138	1001.5142	-0.39	0	50		0.017	1		R.NVAQADASVK.A
	175	184	501.7642	1001.5138	1001.5142	-0.33	0	55		0.0053	1		R.NVAQADASVK.A
	175	184	501.7645	1001.5144	1001.5142	0.29	0	55		0.0049	1		R.NVAQADASVK.A
	175	184	501.7645	1001.5145	1001.5142	0.35	0	46		0.045	1		R.NVAQADASVK.A
	175	184	501.7646	1001.5146	1001.5142	0.47	0	47		0.031	1		R.NVAQADASVK.A
	175	184	501.7646	1001.5146	1001.5142	0.47	0	53		0.0082	1		R.NVAQADASVK.A
	175	184	501.7646	1001.5147	1001.5142	0.53	0	59		0.0023	1		R.NVAQADASVK.A
	175	184	501.7647	1001.5148	1001.5142	0.65	0	56		0.0046	1		R.NVAQADASVK.A
	175	184	501.7647	1001.5149	1001.5142	0.77	0	57		0.0038	1		R.NVAQADASVK.A
	175	184	501.7648	1001.5150	1001.5142	0.83	0	47		0.034	1		R.NVAQADASVK.A
	175	184	501.7648	1001.5150	1001.5142	0.83	0	53		0.0085	1		R.NVAQADASVK.A
	175	184	501.7648	1001.5150	1001.5142	0.89	0	58		0.0027	1		R.NVAQADASVK.A
	175	184	501.7648	1001.5151	1001.5142	0.95	0	56		0.0043	1		R.NVAQADASVK.A
	175	184	501.7648	1001.5151	1001.5142	0.95	0	56		0.0047	1		R.NVAQADASVK.A
	175	184	501.7649	1001.5152	1001.5142	1.01	0	53		0.0088	1		R.NVAQADASVK.A
	175	184	501.7649	1001.5153	1001.5142	1.13	0	49		0.024	1		R.NVAQADASVK.A
	175	184	501.7649	1001.5153	1001.5142	1.19	0	62		0.0011	1		R.NVAQADASVK.A
	175	184	501.7651	1001.5156	1001.5142	1.45	0	55		0.0048	1		R.NVAQADASVK.A
	175	184	501.7651	1001.5157	1001.5142	1.51	0	53		0.0093	1		R.NVAQADASVK.A
	175	184	501.7651	1001.5157	1001.5142	1.57	0	55		0.0049	1		R.NVAQADASVK.A
	175	184	501.7651	1001.5157	1001.5142	1.57	0	55		0.0058	1		R.NVAQADASVK.A
	175	184	501.7652	1001.5158	1001.5142	1.63	0	58		0.0025	1		R.NVAQADASVK.A
	175	184	501.7653	1001.5160	1001.5142	1.87	0	53		0.0084	1		R.NVAQADASVK.A
	175	184	501.7653	1001.5161	1001.5142	1.93	0	53		0.0089	1		R.NVAQADASVK.A
	175	184	501.7654	1001.5161	1001.5142	1.98	0	55		0.0048	1		R.NVAQADASVK.A
	175	184	501.7656	1001.5166	1001.5142	2.46	0	53		0.0084	1		R.NVAQADASVK.A
	175	184	501.7656	1001.5167	1001.5142	2.54	0	48		0.026	1		R.NVAQADASVK.A
	175	184	501.7658	1001.5170	1001.5142	2.84	0	53		0.0084	1		R.NVAQADASVK.A
	193	201	461.2685	920.5225	920.5331	-11.6	0	46		0.028	1		K.YVGVSLVGK.T
	193	201	461.2713	920.5280	920.5331	-5.58	0	48		0.018	1		K.YVGVSLVGK.T
	193	201	461.2716	920.5287	920.5331	-4.78	0	46		0.026	1		K.YVGVSLVGK.T
	193	201	461.2718	920.5291	920.5331	-4.39	0	50		0.013	1		K.YVGVSLVGK.T
	193	201	461.2721	920.5296	920.5331	-3.80	0	54		0.0047	1		K.YVGVSLVGK.T
	193	201	461.2727	920.5309	920.5331	-2.45	0	45		0.04	1		K.YVGVSLVGK.T
	193	201	461.2727	920.5309	920.5331	-2.39	0	46		0.026	1		K.YVGVSLVGK.T
	193	201	461.2729	920.5313	920.5331	-1.93	0	45		0.033	1		K.YVGVSLVGK.T
	193	201	461.2735	920.5325	920.5331	-0.67	0	48		0.016	1		K.YVGVSLVGK.T
	211	217	366.2044	730.3942	730.3974	-4.31	0	70		0.00038	1		K.VGTEVAR.R
	211	217	366.2054	730.3963	730.3974	-1.49	0	68		0.00053	1		K.VGTEVAR.R
	226	237	442.2247	1323.6524	1323.6571	-3.61	0	45		0.036	1	U	R.VIAHDPYAPADR.A
	226	237	442.2249	1323.6528	1323.6571	-3.27	0	48		0.021	1	U	R.VIAHDPYAPADR.A
	226	237	662.8338	1323.6530	1323.6571	-3.09	0	56		0.0032	1	U	R.VIAHDPYAPADR.A
	226	237	442.2250	1323.6531	1323.6571	-3.04	0	46		0.028	1	U	R.VIAHDPYAPADR.A
	226	237	662.8340	1323.6534	1323.6571	-2.82	0	44		0.044	1	U	R.VIAHDPYAPADR.A
	226	237	662.8341	1323.6537	1323.6571	-2.62	0	53		0.0061	1	U	R.VIAHDPYAPADR.A
	226	237	662.8341	1323.6537	1323.6571	-2.62	0	56		0.0032	1	U	R.VIAHDPYAPADR.A
	226	237	662.8342	1323.6538	1323.6571	-2.53	0	58		0.0019	1	U	R.VIAHDPYAPADR.A
	226	237	662.8348	1323.6550	1323.6571	-1.61	0	46		0.03	1	U	R.VIAHDPYAPADR.A
	226	237	662.8348	1323.6551	1323.6571	-1.52	0	50		0.013	1	U	R.VIAHDPYAPADR.A
	271	279	525.7754	1049.5362	1049.5393	-2.93	0	63		0.00068	1		K.ILNDETFAK.M
	271	279	525.7756	1049.5366	1049.5393	-2.59	0	63		0.00068	1		K.ILNDETFAK.M
	271	279	525.7758	1049.5371	1049.5393	-2.11	0	63		0.00076	1		K.ILNDETFAK.M
	271	279	525.7759	1049.5372	1049.5393	-2.00	0	63		0.00067	1		K.ILNDETFAK.M
	271	279	525.7761	1049.5377	1049.5393	-1.54	0	63		0.00069	1		K.ILNDETFAK.M
	271	279	525.7761	1049.5377	1049.5393	-1.54	0	55		0.0045	1		K.ILNDETFAK.M
	292	302	572.3020	1142.5894	1142.5932	-3.24	0	47		0.022	1		R.GGVIDEDALVR.A
	292	302	572.3022	1142.5899	1142.5932	-2.81	0	49		0.015	1		R.GGVIDEDALVR.A
	292	302	572.3024	1142.5902	1142.5932	-2.60	0	55		0.0042	1		R.GGVIDEDALVR.A
	292	302	572.3024	1142.5902	1142.5932	-2.60	0	61		0.00092	1		R.GGVIDEDALVR.A
	292	302	572.3027	1142.5909	1142.5932	-1.97	0	64		0.00048	1		R.GGVIDEDALVR.A
	292	302	572.3027	1142.5909	1142.5932	-1.97	0	47		0.027	1		R.GGVIDEDALVR.A
	292	302	572.3029	1142.5912	1142.5932	-1.74	0	53		0.0065	1		R.GGVIDEDALVR.A
	292	302	572.3029	1142.5913	1142.5932	-1.63	0	53		0.0067	1		R.GGVIDEDALVR.A
	292	302	572.3032	1142.5918	1142.5932	-1.21	0	49		0.015	1		R.GGVIDEDALVR.A
	292	302	572.3032	1142.5919	1142.5932	-1.11	0	61		0.00095	1		R.GGVIDEDALVR.A
	292	302	572.3032	1142.5919	1142.5932	-1.11	0	55		0.0042	1		R.GGVIDEDALVR.A
	292	302	572.3033	1142.5921	1142.5932	-0.90	0	65		0.0004	1		R.GGVIDEDALVR.A
	292	302	572.3035	1142.5924	1142.5932	-0.67	0	57		0.0025	1		R.GGVIDEDALVR.A
	303	319	568.3120	1701.9140	1701.9301	-9.46	0	65		0.00029	1	U	R.ALDAGIVAQAALDVFTK.E
	303	319	568.3137	1701.9193	1701.9301	-6.34	0	62		0.00062	1	U	R.ALDAGIVAQAALDVFTK.E
	303	319	568.3142	1701.9208	1701.9301	-5.48	0	73		4.8e-05	1	U	R.ALDAGIVAQAALDVFTK.E
	303	319	568.3149	1701.9228	1701.9301	-4.30	0	55		0.0029	1	U	R.ALDAGIVAQAALDVFTK.E
	303	319	568.3151	1701.9235	1701.9301	-3.88	0	65		0.00024	1	U	R.ALDAGIVAQAALDVFTK.E
	303	319	568.3152	1701.9239	1701.9301	-3.65	0	68		0.00013	1	U	R.ALDAGIVAQAALDVFTK.E
	303	319	568.3155	1701.9246	1701.9301	-3.22	0	67		0.00018	1	U	R.ALDAGIVAQAALDVFTK.E
	303	319	568.3163	1701.9270	1701.9301	-1.83	0	77		1.8e-05	1	U	R.ALDAGIVAQAALDVFTK.E
	303	319	568.3166	1701.9279	1701.9301	-1.29	0	44		0.032	1	U	R.ALDAGIVAQAALDVFTK.E
	303	319	568.3166	1701.9281	1701.9301	-1.18	0	59		0.0011	1	U	R.ALDAGIVAQAALDVFTK.E
	303	319	568.3167	1701.9283	1701.9301	-1.07	0	68		0.00015	1	U	R.ALDAGIVAQAALDVFTK.E
	303	319	568.3167	1701.9283	1701.9301	-1.07	0	68		0.00014	1	U	R.ALDAGIVAQAALDVFTK.E
	303	319	568.3168	1701.9285	1701.9301	-0.97	0	68		0.00014	1	U	R.ALDAGIVAQAALDVFTK.E
	303	319	568.3178	1701.9316	1701.9301	0.86	0	73		4.2e-05	1	U	R.ALDAGIVAQAALDVFTK.E
	303	319	568.3179	1701.9318	1701.9301	0.97	0	65		0.00026	1	U	R.ALDAGIVAQAALDVFTK.E
	303	319	568.3191	1701.9354	1701.9301	3.12	0	53		0.004	1	U	R.ALDAGIVAQAALDVFTK.E
	398	410	599.8597	1197.7049	1197.7081	-2.67	0	80		5.9e-06	1		R.LAVQLVAGGSGVK.N
	398	410	599.8601	1197.7055	1197.7081	-2.16	0	78		8.5e-06	1		R.LAVQLVAGGSGVK.N
	398	410	599.8601	1197.7057	1197.7081	-2.06	0	78		8.8e-06	1		R.LAVQLVAGGSGVK.N
	398	410	599.8602	1197.7058	1197.7081	-1.96	0	77		1.2e-05	1		R.LAVQLVAGGSGVK.N
	398	410	599.8602	1197.7058	1197.7081	-1.96	0	75		1.7e-05	1		R.LAVQLVAGGSGVK.N
	398	410	599.8602	1197.7058	1197.7081	-1.96	0	78		8.5e-06	1		R.LAVQLVAGGSGVK.N
	398	410	599.8602	1197.7059	1197.7081	-1.86	0	73		2.9e-05	1		R.LAVQLVAGGSGVK.N
	398	410	599.8603	1197.7060	1197.7081	-1.76	0	74		2.3e-05	1		R.LAVQLVAGGSGVK.N
	398	410	599.8603	1197.7060	1197.7081	-1.76	0	80		5.7e-06	1		R.LAVQLVAGGSGVK.N
	398	410	599.8604	1197.7063	1197.7081	-1.55	0	77		1.2e-05	1		R.LAVQLVAGGSGVK.N
	398	410	599.8604	1197.7063	1197.7081	-1.55	0	77		1.2e-05	1		R.LAVQLVAGGSGVK.N
	398	410	599.8605	1197.7065	1197.7081	-1.35	0	73		2.7e-05	1		R.LAVQLVAGGSGVK.N
	398	410	599.8605	1197.7065	1197.7081	-1.35	0	73		2.5e-05	1		R.LAVQLVAGGSGVK.N
	398	410	599.8605	1197.7065	1197.7081	-1.35	0	73		2.9e-05	1		R.LAVQLVAGGSGVK.N
	398	410	599.8605	1197.7065	1197.7081	-1.35	0	78		8.4e-06	1		R.LAVQLVAGGSGVK.N
	398	410	599.8606	1197.7066	1197.7081	-1.24	0	69		7.3e-05	1		R.LAVQLVAGGSGVK.N
	398	410	599.8606	1197.7066	1197.7081	-1.24	0	75		1.7e-05	1		R.LAVQLVAGGSGVK.N
	398	410	599.8607	1197.7068	1197.7081	-1.14	0	75		1.7e-05	1		R.LAVQLVAGGSGVK.N
	398	410	599.8608	1197.7070	1197.7081	-0.94	0	68		9.7e-05	1		R.LAVQLVAGGSGVK.N
	398	410	599.8608	1197.7070	1197.7081	-0.94	0	79		6.6e-06	1		R.LAVQLVAGGSGVK.N
	398	410	599.8608	1197.7071	1197.7081	-0.84	0	71		4e-05	1		R.LAVQLVAGGSGVK.N
	398	410	599.8608	1197.7071	1197.7081	-0.84	0	74		2.3e-05	1		R.LAVQLVAGGSGVK.N
	398	410	599.8609	1197.7072	1197.7081	-0.74	0	75		1.7e-05	1		R.LAVQLVAGGSGVK.N
	398	410	599.8609	1197.7072	1197.7081	-0.74	0	75		1.7e-05	1		R.LAVQLVAGGSGVK.N
	398	410	599.8609	1197.7072	1197.7081	-0.74	0	74		2.4e-05	1		R.LAVQLVAGGSGVK.N
	398	410	599.8609	1197.7072	1197.7081	-0.74	0	73		2.7e-05	1		R.LAVQLVAGGSGVK.N
	398	410	599.8609	1197.7072	1197.7081	-0.74	0	80		6.1e-06	1		R.LAVQLVAGGSGVK.N
	398	410	599.8610	1197.7074	1197.7081	-0.64	0	60		0.00061	1		R.LAVQLVAGGSGVK.N
	398	410	599.8610	1197.7074	1197.7081	-0.64	0	70		5.2e-05	1		R.LAVQLVAGGSGVK.N
	398	410	599.8610	1197.7074	1197.7081	-0.64	0	76		1.5e-05	1		R.LAVQLVAGGSGVK.N
	398	410	599.8610	1197.7075	1197.7081	-0.54	0	70		5.2e-05	1		R.LAVQLVAGGSGVK.N
	398	410	599.8610	1197.7075	1197.7081	-0.54	0	78		8.3e-06	1		R.LAVQLVAGGSGVK.N
	398	410	599.8611	1197.7076	1197.7081	-0.44	0	62		0.00031	1		R.LAVQLVAGGSGVK.N
	398	410	599.8611	1197.7076	1197.7081	-0.44	0	75		1.7e-05	1		R.LAVQLVAGGSGVK.N
	398	410	599.8612	1197.7079	1197.7081	-0.22	0	73		2.5e-05	1		R.LAVQLVAGGSGVK.N
	398	410	599.8612	1197.7079	1197.7081	-0.22	0	69		6.3e-05	1		R.LAVQLVAGGSGVK.N
	398	410	599.8612	1197.7079	1197.7081	-0.22	0	75		1.8e-05	1		R.LAVQLVAGGSGVK.N
	398	410	599.8612	1197.7079	1197.7081	-0.22	0	78		8.4e-06	1		R.LAVQLVAGGSGVK.N
	398	410	599.8612	1197.7079	1197.7081	-0.22	0	78		8.4e-06	1		R.LAVQLVAGGSGVK.N
	398	410	599.8613	1197.7080	1197.7081	-0.12	0	68		8.8e-05	1		R.LAVQLVAGGSGVK.N
	398	410	599.8613	1197.7081	1197.7081	-0.018	0	74		2.4e-05	1		R.LAVQLVAGGSGVK.N
	398	410	599.8616	1197.7086	1197.7081	0.38	0	77		1.1e-05	1		R.LAVQLVAGGSGVK.N
	398	410	599.8618	1197.7090	1197.7081	0.70	0	57		0.0011	1		R.LAVQLVAGGSGVK.N
	398	410	599.8620	1197.7094	1197.7081	1.10	0	77		1.1e-05	1		R.LAVQLVAGGSGVK.N
	398	410	599.8621	1197.7096	1197.7081	1.20	0	76		1.4e-05	1		R.LAVQLVAGGSGVK.N
	398	410	599.8623	1197.7100	1197.7081	1.60	0	76		1.2e-05	1		R.LAVQLVAGGSGVK.N
	398	410	599.8626	1197.7105	1197.7081	2.02	0	74		2e-05	1		R.LAVQLVAGGSGVK.N
	398	410	599.8626	1197.7107	1197.7081	2.12	0	76		1.3e-05	1		R.LAVQLVAGGSGVK.N
	421	428	453.7101	905.4057	905.4090	-3.73	0	55		0.0027	1	U	R.ATDDLDTR.L
	421	428	453.7101	905.4057	905.4090	-3.66	0	55		0.0027	1	U	R.ATDDLDTR.L
	421	428	453.7104	905.4063	905.4090	-2.98	0	55		0.0027	1	U	R.ATDDLDTR.L
	421	428	453.7105	905.4064	905.4090	-2.91	0	55		0.0027	1	U	R.ATDDLDTR.L
	421	428	453.7105	905.4065	905.4090	-2.84	0	55		0.0027	1	U	R.ATDDLDTR.L
	421	428	453.7105	905.4065	905.4090	-2.78	0	50		0.0075	1	U	R.ATDDLDTR.L
	421	428	453.7106	905.4066	905.4090	-2.64	0	46		0.02	1	U	R.ATDDLDTR.L
	421	428	453.7111	905.4077	905.4090	-1.43	0	55		0.0028	1	U	R.ATDDLDTR.L
	421	428	453.7112	905.4079	905.4090	-1.23	0	55		0.0028	1	U	R.ATDDLDTR.L
	421	428	453.7112	905.4079	905.4090	-1.23	0	54		0.0035	1	U	R.ATDDLDTR.L
	437	457	760.0658	2277.1756	2277.1893	-6.01	0	79		9.2e-06	1	U	K.GIIEPISDVYVNLVNADFTAK.Q
	437	457	760.0660	2277.1763	2277.1893	-5.69	0	46		0.02	1	U	K.GIIEPISDVYVNLVNADFTAK.Q
	437	457	760.0684	2277.1834	2277.1893	-2.56	0	80		7.7e-06	1	U	K.GIIEPISDVYVNLVNADFTAK.Q
	437	457	1139.6020	2277.1895	2277.1893	0.13	0	97		1.4e-07	1	U	K.GIIEPISDVYVNLVNADFTAK.Q
	437	457	760.0706	2277.1899	2277.1893	0.26	0	63		0.00035	1	U	K.GIIEPISDVYVNLVNADFTAK.Q
	437	457	1139.6028	2277.1910	2277.1893	0.77	0	110		7.6e-09	1	U	K.GIIEPISDVYVNLVNADFTAK.Q
	437	457	760.0712	2277.1917	2277.1893	1.07	0	91		5.8e-07	1	U	K.GIIEPISDVYVNLVNADFTAK.Q
	437	457	1139.6033	2277.1920	2277.1893	1.20	0	74		3.1e-05	1	U	K.GIIEPISDVYVNLVNADFTAK.Q
	437	457	1139.6102	2277.2059	2277.1893	7.31	0	69		8.9e-05	1	U	K.GIIEPISDVYVNLVNADFTAK.Q
	492	503	620.8037	1239.5929	1239.5983	-4.37	0	67		0.0002	1	U	K.FASSLSESGEVK.V
	492	503	620.8041	1239.5937	1239.5983	-3.67	0	73		4.7e-05	1	U	K.FASSLSESGEVK.V
	492	503	620.8041	1239.5937	1239.5983	-3.67	0	65		0.00029	1	U	K.FASSLSESGEVK.V
	492	503	620.8042	1239.5938	1239.5983	-3.58	0	76		2.3e-05	1	U	K.FASSLSESGEVK.V
	492	503	620.8043	1239.5940	1239.5983	-3.48	0	80		9.6e-06	1	U	K.FASSLSESGEVK.V
	492	503	620.8044	1239.5942	1239.5983	-3.29	0	73		5.3e-05	1	U	K.FASSLSESGEVK.V
	492	503	620.8045	1239.5944	1239.5983	-3.09	0	84		4e-06	1	U	K.FASSLSESGEVK.V
	492	503	620.8045	1239.5944	1239.5983	-3.09	0	79		1.2e-05	1	U	K.FASSLSESGEVK.V
	492	503	620.8045	1239.5944	1239.5983	-3.09	0	70		0.0001	1	U	K.FASSLSESGEVK.V
	492	503	620.8045	1239.5944	1239.5983	-3.09	0	66		0.00023	1	U	K.FASSLSESGEVK.V
	492	503	620.8046	1239.5947	1239.5983	-2.88	0	74		3.8e-05	1	U	K.FASSLSESGEVK.V
	492	503	620.8047	1239.5948	1239.5983	-2.79	0	66		0.00025	1	U	K.FASSLSESGEVK.V
	492	503	620.8048	1239.5949	1239.5983	-2.69	0	78		1.4e-05	1	U	K.FASSLSESGEVK.V
	492	503	620.8048	1239.5949	1239.5983	-2.69	0	82		5.5e-06	1	U	K.FASSLSESGEVK.V
	492	503	620.8048	1239.5949	1239.5983	-2.69	0	74		3.6e-05	1	U	K.FASSLSESGEVK.V
	492	503	620.8048	1239.5951	1239.5983	-2.59	0	83		5.2e-06	1	U	K.FASSLSESGEVK.V
	492	503	620.8048	1239.5951	1239.5983	-2.59	0	77		1.8e-05	1	U	K.FASSLSESGEVK.V
	492	503	620.8049	1239.5952	1239.5983	-2.50	0	85		2.8e-06	1	U	K.FASSLSESGEVK.V
	492	503	620.8049	1239.5952	1239.5983	-2.50	0	73		5.1e-05	1	U	K.FASSLSESGEVK.V
	492	503	620.8049	1239.5953	1239.5983	-2.40	0	70		0.00011	1	U	K.FASSLSESGEVK.V
	492	503	620.8050	1239.5954	1239.5983	-2.30	0	83		5.3e-06	1	U	K.FASSLSESGEVK.V
	492	503	620.8050	1239.5954	1239.5983	-2.30	0	70		9.1e-05	1	U	K.FASSLSESGEVK.V
	492	503	620.8051	1239.5955	1239.5983	-2.21	0	85		2.8e-06	1	U	K.FASSLSESGEVK.V
	492	503	620.8051	1239.5957	1239.5983	-2.11	0	83		5.3e-06	1	U	K.FASSLSESGEVK.V
	492	503	620.8051	1239.5957	1239.5983	-2.11	0	80		9.6e-06	1	U	K.FASSLSESGEVK.V
	492	503	620.8051	1239.5957	1239.5983	-2.11	0	73		5.4e-05	1	U	K.FASSLSESGEVK.V
	492	503	620.8052	1239.5958	1239.5983	-2.00	0	85		2.9e-06	1	U	K.FASSLSESGEVK.V
	492	503	620.8052	1239.5958	1239.5983	-2.00	0	75		2.9e-05	1	U	K.FASSLSESGEVK.V
	492	503	620.8052	1239.5959	1239.5983	-1.90	0	85		2.8e-06	1	U	K.FASSLSESGEVK.V
	492	503	620.8052	1239.5959	1239.5983	-1.90	0	75		3e-05	1	U	K.FASSLSESGEVK.V
	492	503	620.8053	1239.5960	1239.5983	-1.80	0	65		0.00028	1	U	K.FASSLSESGEVK.V
	492	503	620.8053	1239.5960	1239.5983	-1.80	0	64		0.00041	1	U	K.FASSLSESGEVK.V
	492	503	620.8054	1239.5962	1239.5983	-1.71	0	85		2.9e-06	1	U	K.FASSLSESGEVK.V
	492	503	620.8054	1239.5963	1239.5983	-1.61	0	78		1.7e-05	1	U	K.FASSLSESGEVK.V
	492	503	620.8055	1239.5964	1239.5983	-1.51	0	71		7.9e-05	1	U	K.FASSLSESGEVK.V
	492	503	620.8055	1239.5964	1239.5983	-1.51	0	85		2.9e-06	1	U	K.FASSLSESGEVK.V
	492	503	620.8055	1239.5964	1239.5983	-1.51	0	80		1e-05	1	U	K.FASSLSESGEVK.V
	492	503	620.8055	1239.5964	1239.5983	-1.51	0	72		6.8e-05	1	U	K.FASSLSESGEVK.V
	492	503	620.8055	1239.5965	1239.5983	-1.41	0	72		7e-05	1	U	K.FASSLSESGEVK.V
	492	503	620.8056	1239.5966	1239.5983	-1.32	0	83		5.3e-06	1	U	K.FASSLSESGEVK.V
	492	503	620.8056	1239.5966	1239.5983	-1.32	0	85		3.4e-06	1	U	K.FASSLSESGEVK.V
	492	503	620.8057	1239.5968	1239.5983	-1.22	0	74		4.4e-05	1	U	K.FASSLSESGEVK.V
	492	503	620.8057	1239.5969	1239.5983	-1.11	0	78		1.6e-05	1	U	K.FASSLSESGEVK.V
	492	503	620.8059	1239.5973	1239.5983	-0.82	0	73		5.5e-05	1	U	K.FASSLSESGEVK.V
	492	503	620.8061	1239.5976	1239.5983	-0.53	0	77		1.8e-05	1	U	K.FASSLSESGEVK.V
	492	503	620.8062	1239.5977	1239.5983	-0.43	0	78		1.5e-05	1	U	K.FASSLSESGEVK.V
	492	503	620.8062	1239.5977	1239.5983	-0.43	0	76		2.5e-05	1	U	K.FASSLSESGEVK.V
	492	503	620.8062	1239.5977	1239.5983	-0.43	0	67		0.0002	1	U	K.FASSLSESGEVK.V
	492	503	620.8063	1239.5981	1239.5983	-0.12	0	77		2e-05	1	U	K.FASSLSESGEVK.V
	492	503	620.8066	1239.5987	1239.5983	0.36	0	66		0.00025	1	U	K.FASSLSESGEVK.V
	492	503	620.8066	1239.5987	1239.5983	0.36	0	61		0.00075	1	U	K.FASSLSESGEVK.V
	492	503	620.8068	1239.5990	1239.5983	0.55	0	72		5.9e-05	1	U	K.FASSLSESGEVK.V
	492	503	620.8068	1239.5990	1239.5983	0.55	0	70		0.00011	1	U	K.FASSLSESGEVK.V
	492	503	620.8070	1239.5995	1239.5983	0.96	0	75		3.1e-05	1	U	K.FASSLSESGEVK.V
	492	503	620.8070	1239.5995	1239.5983	0.96	0	55		0.0033	1	U	K.FASSLSESGEVK.V
	492	503	620.8071	1239.5996	1239.5983	1.05	0	69		0.00012	1	U	K.FASSLSESGEVK.V
	492	503	620.8072	1239.5998	1239.5983	1.25	0	74		3.7e-05	1	U	K.FASSLSESGEVK.V
	492	503	620.8072	1239.5998	1239.5983	1.25	0	63		0.00055	1	U	K.FASSLSESGEVK.V
	492	503	620.8074	1239.6003	1239.5983	1.63	0	76		2.3e-05	1	U	K.FASSLSESGEVK.V
	492	503	620.8079	1239.6012	1239.5983	2.33	0	69		0.00013	1	U	K.FASSLSESGEVK.V
	492	503	620.8081	1239.6017	1239.5983	2.73	0	55		0.003	1	U	K.FASSLSESGEVK.V
	510	517	433.7389	865.4632	865.4658	-3.01	0	50		0.012	1		K.DGVPHLTK.V
	536	564	1013.1591	3036.4554	3036.4645	-3.02	0	88		9.5e-07	1	U	R.QVDQPGMIGTVGSILGESNVNVNFMSVGR.I + 2 Oxidation (M)
	536	564	1013.1603	3036.4592	3036.4645	-1.75	0	87		1.3e-06	1	U	R.QVDQPGMIGTVGSILGESNVNVNFMSVGR.I + 2 Oxidation (M)
	536	564	1013.1607	3036.4603	3036.4645	-1.39	0	95		2.1e-07	1	U	R.QVDQPGMIGTVGSILGESNVNVNFMSVGR.I + 2 Oxidation (M)
	536	564	1013.1630	3036.4671	3036.4645	0.84	0	97		1.2e-07	1	U	R.QVDQPGMIGTVGSILGESNVNVNFMSVGR.I + 2 Oxidation (M)
	536	564	1013.1634	3036.4683	3036.4645	1.26	0	68		9.7e-05	1	U	R.QVDQPGMIGTVGSILGESNVNVNFMSVGR.I + 2 Oxidation (M)
	536	564	1013.1641	3036.4705	3036.4645	1.98	0	109		9e-09	1	U	R.QVDQPGMIGTVGSILGESNVNVNFMSVGR.I + 2 Oxidation (M)
	589	602	530.9634	1589.8683	1589.8705	-1.37	0	68		0.00015	1		K.IGEIPAVEEFVFLK.L
	589	602	795.9426	1589.8706	1589.8705	0.066	0	50		0.0083	1		K.IGEIPAVEEFVFLK.L
4	81	91	553.2891	1104.5637	1104.5663	-2.34	0	53	42	0.0071	1	U	K.SVGDLTSADLK.G	12
	99	116	1008.4752	2014.9359	2014.9444	-4.20	0	107		1.8e-08	1	U	R.ADLNVPLDDNQTITDDTR.I
	99	116	1008.4777	2014.9409	2014.9444	-1.72	0	96		2.1e-07	1	U	R.ADLNVPLDDNQTITDDTR.I
	99	116	672.6546	2014.9420	2014.9444	-1.18	0	57		0.0018	1	U	R.ADLNVPLDDNQTITDDTR.I
	99	116	1008.4791	2014.9437	2014.9444	-0.32	0	89		1.2e-06	1	U	R.ADLNVPLDDNQTITDDTR.I
	99	116	1008.4791	2014.9437	2014.9444	-0.32	0	79		1.1e-05	1	U	R.ADLNVPLDDNQTITDDTR.I
	99	116	1008.4794	2014.9442	2014.9444	-0.081	0	96		2.4e-07	1	U	R.ADLNVPLDDNQTITDDTR.I
	119	125	357.2309	712.4472	712.4483	-1.57	0	48		0.0078	1		R.AAIPTIK.Y
	119	125	357.2309	712.4473	712.4483	-1.40	0	48		0.0079	1		R.AAIPTIK.Y
	150	158	500.3025	998.5904	998.5913	-0.87	0	50		0.0088	1		K.FSLAPLVPR.L
	150	158	500.3029	998.5912	998.5913	-0.065	0	50		0.0078	1		K.FSLAPLVPR.L
	198	204	486.7368	971.4591	971.4600	-0.91	1	42		0.044	1		R.FYKEEEK.N
	213	230	645.3293	1932.9660	1932.9694	-1.73	0	47		0.022	1		K.LASLADLYVNDAFGTAHR.A
	231	240	500.7562	999.4978	999.4985	-0.67	0	53		0.0046	1		R.AHASTEGVTK.F
	231	240	334.1733	999.4980	999.4985	-0.51	0	48		0.015	1		R.AHASTEGVTK.F
	231	240	334.1734	999.4984	999.4985	-0.15	0	51		0.0071	1		R.AHASTEGVTK.F
	231	240	500.7568	999.4990	999.4985	0.47	0	53		0.0048	1		R.AHASTEGVTK.F
	231	240	500.7570	999.4994	999.4985	0.85	0	62		0.00059	1		R.AHASTEGVTK.F
	337	351	763.4459	1524.8772	1524.8763	0.55	0	46		0.011	1		K.GVSLLLPTDVVVADK.F
	352	359	425.2079	848.4012	848.4028	-1.94	0	44		0.045	1		K.FAPDANSK.I
	352	359	425.2080	848.4014	848.4028	-1.66	0	44		0.047	1		K.FAPDANSK.I
	407	417	546.7874	1091.5603	1091.5611	-0.76	0	61		0.0013	1	U	K.FAAGTEAIANK.L
	418	424	395.2201	788.4257	788.4279	-2.79	0	49		0.024	1	U	K.LAELSEK.G
	425	441	787.4249	1572.8353	1572.8359	-0.39	0	75		4.1e-05	1		K.GVTTIIGGGDSVAAVEK.V
	425	441	787.4257	1572.8369	1572.8359	0.61	0	79		1.5e-05	1		K.GVTTIIGGGDSVAAVEK.V
	425	441	787.4263	1572.8381	1572.8359	1.39	0	83		6.6e-06	1		K.GVTTIIGGGDSVAAVEK.V
5	80	93	757.3466	1512.6787	1512.6766	1.37	0	48	42	0.011	1	U	R.SEVVGYMGDDNLAK.A + Oxidation (M)	7
	94	109	795.9644	1589.9143	1589.9141	0.13	0	77		8.9e-06	1	U	K.ALEGADLVIIPAGVPR.K
	94	109	795.9653	1589.9160	1589.9141	1.20	0	77		8.7e-06	1	U	K.ALEGADLVIIPAGVPR.K
	116	127	659.8535	1317.6925	1317.6929	-0.28	0	52		0.013	1		R.DDLFNINAGIVK.N
	116	127	659.8538	1317.6931	1317.6929	0.18	0	48		0.032	1		R.DDLFNINAGIVK.N
	116	127	659.8544	1317.6942	1317.6929	1.01	0	49		0.026	1		R.DDLFNINAGIVK.N
	171	181	610.3563	1218.6981	1218.6972	0.69	0	71		5.8e-05	1		K.LFGVTTLDVVR.A
	234	246	695.3513	1388.6880	1388.6896	-1.16	1	72		8.3e-05	1		K.RTQDGGTEVVEAK.A
	234	246	695.3520	1388.6894	1388.6896	-0.11	1	60		0.0012	1		K.RTQDGGTEVVEAK.A
	235	246	617.3008	1232.5871	1232.5885	-1.09	0	66		0.00029	1		R.TQDGGTEVVEAK.A
	235	246	617.3010	1232.5875	1232.5885	-0.78	0	68		0.0002	1		R.TQDGGTEVVEAK.A
	319	329	613.8519	1225.6893	1225.6918	-2.00	0	61		0.00057	1	U	K.EGLEALKPELK.S
	319	329	613.8523	1225.6900	1225.6918	-1.41	0	64		0.00033	1	U	K.EGLEALKPELK.S
	319	329	409.5706	1225.6900	1225.6918	-1.41	0	48		0.012	1	U	K.EGLEALKPELK.S
	319	329	613.8525	1225.6904	1225.6918	-1.10	0	56		0.0022	1	U	K.EGLEALKPELK.S
	319	329	613.8527	1225.6909	1225.6918	-0.71	0	62		0.00046	1	U	K.EGLEALKPELK.S
	319	329	409.5710	1225.6911	1225.6918	-0.53	0	50		0.0089	1	U	K.EGLEALKPELK.S
	319	329	409.5710	1225.6912	1225.6918	-0.45	0	43		0.041	1	U	K.EGLEALKPELK.S
6	34	45	646.3212	1290.6278	1290.6303	-1.94	0	61	42	0.001	1		R.ELISNSSDALDK.I	9
	34	45	646.3212	1290.6279	1290.6303	-1.85	0	62		0.00091	1		R.ELISNSSDALDK.I
	48	54	420.2106	838.4066	838.4072	-0.71	0	46		0.021	1		R.FESLTDK.S
	48	54	420.2108	838.4069	838.4072	-0.35	0	45		0.028	1		R.FESLTDK.S
	57	71	578.9855	1733.9346	1733.9352	-0.36	0	49		0.01	1		K.LDGQPELFIHIIPDK.T
	72	87	847.9336	1693.8527	1693.8557	-1.71	0	73		5.2e-05	1		K.TNNTLTIIDSGIGMTK.A + Oxidation (M)
	88	99	628.8510	1255.6875	1255.6884	-0.77	0	59		0.0013	1		K.ADLVNNLGTIAR.S
	88	99	628.8513	1255.6880	1255.6884	-0.37	0	70		9.9e-05	1		K.ADLVNNLGTIAR.S
	180	189	662.3052	1322.5959	1322.5990	-2.31	0	55		0.0026	1		K.EDQLEYLEER.R
	234	241	488.7255	975.4364	975.4397	-3.37	0	42		0.04	1		K.VEEVDEEK.E
	358	371	764.4038	1526.7931	1526.7940	-0.62	0	84		4.8e-06	1		K.GIVDSEDLPLNISR.E
	441	449	475.2445	948.4745	948.4764	-2.01	0	58		0.0025	1		K.SGDELTSLK.D
7	97	105	564.7686	1127.5225	1127.5247	-1.93	0	46	42	0.017	1		K.FEYQAEVSR.L	17
	97	105	564.7687	1127.5228	1127.5247	-1.69	0	48		0.01	1		K.FEYQAEVSR.L
	97	105	564.7687	1127.5229	1127.5247	-1.59	0	48		0.011	1		K.FEYQAEVSR.L
	97	105	564.7689	1127.5233	1127.5247	-1.27	0	47		0.014	1		K.FEYQAEVSR.L
	97	105	564.7690	1127.5235	1127.5247	-1.06	0	44		0.027	1		K.FEYQAEVSR.L
	97	105	564.7690	1127.5235	1127.5247	-1.06	0	47		0.014	1		K.FEYQAEVSR.L
	97	105	564.7691	1127.5236	1127.5247	-0.95	0	46		0.018	1		K.FEYQAEVSR.L
	97	105	564.7692	1127.5238	1127.5247	-0.83	0	49		0.01	1		K.FEYQAEVSR.L
	124	135	638.3235	1274.6325	1274.6354	-2.22	0	80		1.5e-05	1		R.ELISNASDALDK.L
	124	135	638.3236	1274.6327	1274.6354	-2.12	0	84		5.2e-06	1		R.ELISNASDALDK.L
	124	135	638.3236	1274.6327	1274.6354	-2.12	0	79		1.7e-05	1		R.ELISNASDALDK.L
	124	135	638.3239	1274.6333	1274.6354	-1.65	0	80		1.5e-05	1		R.ELISNASDALDK.L
	124	135	638.3240	1274.6334	1274.6354	-1.56	0	80		1.5e-05	1		R.ELISNASDALDK.L
	124	135	638.3244	1274.6342	1274.6354	-0.88	0	80		1.4e-05	1		R.ELISNASDALDK.L
	124	135	638.3248	1274.6351	1274.6354	-0.21	0	80		1.4e-05	1		R.ELISNASDALDK.L
	124	135	638.3250	1274.6355	1274.6354	0.072	0	53		0.0067	1		R.ELISNASDALDK.L
	124	137	515.6136	1543.8189	1543.8205	-1.04	1	72		9.7e-05	1		R.ELISNASDALDKLR.Y
	178	194	895.9505	1789.8864	1789.8880	-0.88	0	117		2.5e-09	1		R.QELVDCLGTIAQSGTAK.F
	178	194	597.6364	1789.8874	1789.8880	-0.34	0	64		0.00052	1		R.QELVDCLGTIAQSGTAK.F
	178	194	597.6365	1789.8876	1789.8880	-0.24	0	85		4.7e-06	1		R.QELVDCLGTIAQSGTAK.F
	178	194	895.9514	1789.8883	1789.8880	0.15	0	110		1.2e-08	1		R.QELVDCLGTIAQSGTAK.F
	326	335	639.7750	1277.5354	1277.5372	-1.40	1	55		0.001	1	U	K.KDDQDDQTEK.K + Carbamidomethyl (K)
	326	335	639.7754	1277.5362	1277.5372	-0.73	1	55		0.00096	1	U	K.KDDQDDQTEK.K + Carbamidomethyl (K)
	431	444	828.8986	1655.7827	1655.7832	-0.28	0	77		1.9e-05	1		R.VFISDDFDGELFPR.Y
	431	444	828.8987	1655.7829	1655.7832	-0.14	0	88		1.5e-06	1		R.VFISDDFDGELFPR.Y
	431	444	828.9004	1655.7862	1655.7832	1.85	0	87		1.8e-06	1		R.VFISDDFDGELFPR.Y
	451	464	503.2663	1506.7770	1506.7791	-1.38	0	55		0.0043	1	U	K.GVVDSHDLPLNVSR.E
	451	464	754.3959	1506.7772	1506.7791	-1.25	0	66		0.00033	1	U	K.GVVDSHDLPLNVSR.E
	451	464	754.3960	1506.7774	1506.7791	-1.08	0	70		0.00012	1	U	K.GVVDSHDLPLNVSR.E
	451	464	754.3960	1506.7774	1506.7791	-1.08	0	70		0.00014	1	U	K.GVVDSHDLPLNVSR.E
	451	464	503.2665	1506.7776	1506.7791	-0.97	0	51		0.011	1	U	K.GVVDSHDLPLNVSR.E
	451	464	503.2666	1506.7780	1506.7791	-0.73	0	63		0.00069	1	U	K.GVVDSHDLPLNVSR.E
	451	464	503.2666	1506.7780	1506.7791	-0.73	0	73		6.5e-05	1	U	K.GVVDSHDLPLNVSR.E
	451	464	754.3966	1506.7787	1506.7791	-0.27	0	60		0.0012	1	U	K.GVVDSHDLPLNVSR.E
	451	464	503.2669	1506.7788	1506.7791	-0.17	0	58		0.0021	1	U	K.GVVDSHDLPLNVSR.E
	451	464	754.3975	1506.7804	1506.7791	0.86	0	71		0.00011	1	U	K.GVVDSHDLPLNVSR.E
	451	464	754.3980	1506.7815	1506.7791	1.59	0	72		7.8e-05	1	U	K.GVVDSHDLPLNVSR.E
	465	471	437.7336	873.4526	873.4556	-3.39	0	46		0.048	1		R.EILQESR.I
	483	497	855.4480	1708.8814	1708.8818	-0.19	1	84		4.4e-06	1		R.KAFDMILGISLSENR.E + Oxidation (M)
	484	497	791.3973	1580.7801	1580.7868	-4.23	0	50		0.011	1		K.AFDMILGISLSENR.E + Oxidation (M)
	484	497	791.3994	1580.7841	1580.7868	-1.69	0	66		0.00034	1		K.AFDMILGISLSENR.E + Oxidation (M)
	513	519	431.7068	861.3991	861.4014	-2.66	0	61		0.00065	1		K.LGCIEDR.E
	513	519	431.7071	861.3996	861.4014	-2.11	0	61		0.00065	1		K.LGCIEDR.E
	513	519	431.7077	861.4008	861.4014	-0.69	0	61		0.00074	1		K.LGCIEDR.E
	525	530	341.7334	681.4522	681.4537	-2.25	0	37		0.0086	1		R.IAPLLR.F
	525	530	341.7334	681.4522	681.4537	-2.25	0	37		0.0086	1		R.IAPLLR.F
	613	620	452.7154	903.4162	903.4185	-2.62	0	79		1.2e-05	1		K.EDLDLGDK.N
	613	620	452.7159	903.4172	903.4185	-1.47	0	52		0.0058	1		K.EDLDLGDK.N
	613	620	452.7159	903.4173	903.4185	-1.40	0	79		1.1e-05	1		K.EDLDLGDK.N
	613	620	452.7162	903.4178	903.4185	-0.85	0	79		1.1e-05	1		K.EDLDLGDK.N
	613	624	468.8867	1403.6382	1403.6416	-2.45	1	46		0.017	1		K.EDLDLGDKNEEK.E
	613	624	702.8270	1403.6394	1403.6416	-1.57	1	64		0.00032	1		K.EDLDLGDKNEEK.E
	613	624	468.8872	1403.6396	1403.6416	-1.40	1	51		0.0063	1		K.EDLDLGDKNEEK.E
	613	624	468.8872	1403.6399	1403.6416	-1.21	1	47		0.015	1		K.EDLDLGDKNEEK.E
	613	624	702.8273	1403.6400	1403.6416	-1.14	1	68		0.00013	1		K.EDLDLGDKNEEK.E
	613	624	702.8273	1403.6400	1403.6416	-1.14	1	48		0.012	1		K.EDLDLGDKNEEK.E
	613	624	702.8274	1403.6402	1403.6416	-0.97	1	68		0.00012	1		K.EDLDLGDKNEEK.E
	613	624	468.8875	1403.6406	1403.6416	-0.69	1	49		0.0094	1		K.EDLDLGDKNEEK.E
	613	624	468.8876	1403.6411	1403.6416	-0.37	1	49		0.0092	1		K.EDLDLGDKNEEK.E
	613	624	702.8279	1403.6412	1403.6416	-0.27	1	46		0.021	1		K.EDLDLGDKNEEK.E
	613	624	468.8880	1403.6421	1403.6416	0.35	1	55		0.0024	1		K.EDLDLGDKNEEK.E
	630	640	706.3359	1410.6572	1410.6602	-2.11	1	59		0.0012	1	U	K.KEFGQTCDWIK.K
	630	640	706.3367	1410.6588	1410.6602	-0.99	1	60		0.00089	1	U	K.KEFGQTCDWIK.K
	656	667	617.3283	1232.6421	1232.6435	-1.14	0	69		0.00021	1		R.LSSSPCVLVSGK.F
	656	667	617.3285	1232.6425	1232.6435	-0.75	0	62		0.00091	1		R.LSSSPCVLVSGK.F
	668	676	549.2445	1096.4743	1096.4760	-1.50	0	51		0.0037	1		K.FGWSANMER.L
	668	676	549.2447	1096.4749	1096.4760	-0.96	0	51		0.0035	1		K.FGWSANMER.L
	668	676	549.2447	1096.4749	1096.4760	-0.96	0	51		0.0037	1		K.FGWSANMER.L
	668	676	549.2447	1096.4749	1096.4760	-0.96	0	51		0.0036	1		K.FGWSANMER.L
	668	676	549.2449	1096.4752	1096.4760	-0.74	0	51		0.0042	1		K.FGWSANMER.L
	668	676	549.2450	1096.4754	1096.4760	-0.50	0	51		0.0039	1		K.FGWSANMER.L
	668	676	557.2419	1112.4692	1112.4709	-1.54	0	45		0.0096	1		K.FGWSANMER.L + Oxidation (M)
	668	676	557.2419	1112.4693	1112.4709	-1.43	0	49		0.0036	1		K.FGWSANMER.L + Oxidation (M)
	668	676	557.2421	1112.4696	1112.4709	-1.19	0	49		0.0037	1		K.FGWSANMER.L + Oxidation (M)
	668	676	557.2422	1112.4698	1112.4709	-0.98	0	49		0.0036	1		K.FGWSANMER.L + Oxidation (M)
8	99	108	580.3264	1158.6383	1158.6431	-4.12	0	56	42	0.0035	1		K.ISLCDALIVR.S	16
	99	108	580.3265	1158.6384	1158.6431	-4.02	0	78		2.3e-05	1		K.ISLCDALIVR.S
	99	108	580.3268	1158.6390	1158.6431	-3.50	0	64		0.00051	1		K.ISLCDALIVR.S
	99	108	580.3268	1158.6391	1158.6431	-3.40	0	56		0.003	1		K.ISLCDALIVR.S
	99	108	580.3271	1158.6396	1158.6431	-2.97	0	83		6.9e-06	1		K.ISLCDALIVR.S
	99	108	580.3271	1158.6396	1158.6431	-2.97	0	82		7.3e-06	1		K.ISLCDALIVR.S
	99	108	580.3271	1158.6396	1158.6431	-2.97	0	51		0.01	1		K.ISLCDALIVR.S
	99	108	580.3271	1158.6397	1158.6431	-2.86	0	82		7.7e-06	1		K.ISLCDALIVR.S
	99	108	580.3272	1158.6399	1158.6431	-2.76	0	83		6.9e-06	1		K.ISLCDALIVR.S
	99	108	580.3273	1158.6400	1158.6431	-2.66	0	52		0.0076	1		K.ISLCDALIVR.S
	99	108	580.3273	1158.6401	1158.6431	-2.55	0	71		0.00011	1		K.ISLCDALIVR.S
	99	108	580.3274	1158.6402	1158.6431	-2.45	0	82		7.9e-06	1		K.ISLCDALIVR.S
	99	108	580.3275	1158.6405	1158.6431	-2.24	0	61		0.001	1		K.ISLCDALIVR.S
	99	108	580.3275	1158.6405	1158.6431	-2.24	0	77		2.6e-05	1		K.ISLCDALIVR.S
	99	108	580.3275	1158.6405	1158.6431	-2.24	0	82		7.5e-06	1		K.ISLCDALIVR.S
	99	108	580.3276	1158.6407	1158.6431	-2.02	0	59		0.0017	1		K.ISLCDALIVR.S
	99	108	580.3278	1158.6410	1158.6431	-1.81	0	77		2.6e-05	1		K.ISLCDALIVR.S
	99	108	580.3278	1158.6410	1158.6431	-1.81	0	68		0.00019	1		K.ISLCDALIVR.S
	99	108	580.3278	1158.6411	1158.6431	-1.71	0	64		0.00056	1		K.ISLCDALIVR.S
	99	108	580.3278	1158.6411	1158.6431	-1.71	0	54		0.0057	1		K.ISLCDALIVR.S
	99	108	580.3279	1158.6412	1158.6431	-1.60	0	55		0.0045	1		K.ISLCDALIVR.S
	99	108	580.3279	1158.6413	1158.6431	-1.50	0	82		7.7e-06	1		K.ISLCDALIVR.S
	99	108	580.3279	1158.6413	1158.6431	-1.50	0	82		7.6e-06	1		K.ISLCDALIVR.S
	99	108	580.3281	1158.6416	1158.6431	-1.29	0	77		2.7e-05	1		K.ISLCDALIVR.S
	99	108	580.3281	1158.6416	1158.6431	-1.29	0	82		7.6e-06	1		K.ISLCDALIVR.S
	99	108	580.3281	1158.6417	1158.6431	-1.17	0	77		2.7e-05	1		K.ISLCDALIVR.S
	99	108	580.3281	1158.6417	1158.6431	-1.17	0	64		0.00056	1		K.ISLCDALIVR.S
	99	108	580.3281	1158.6417	1158.6431	-1.17	0	83		7.1e-06	1		K.ISLCDALIVR.S
	99	108	580.3281	1158.6417	1158.6431	-1.17	0	71		0.00011	1		K.ISLCDALIVR.S
	99	108	580.3282	1158.6418	1158.6431	-1.07	0	67		0.00024	1		K.ISLCDALIVR.S
	99	108	580.3282	1158.6418	1158.6431	-1.07	0	77		2.6e-05	1		K.ISLCDALIVR.S
	99	108	580.3282	1158.6418	1158.6431	-1.07	0	77		2.6e-05	1		K.ISLCDALIVR.S
	99	108	580.3282	1158.6418	1158.6431	-1.07	0	82		8.2e-06	1		K.ISLCDALIVR.S
	99	108	580.3283	1158.6419	1158.6431	-0.96	0	77		2.6e-05	1		K.ISLCDALIVR.S
	99	108	580.3283	1158.6421	1158.6431	-0.86	0	67		0.00024	1		K.ISLCDALIVR.S
	99	108	580.3283	1158.6421	1158.6431	-0.86	0	83		7e-06	1		K.ISLCDALIVR.S
	99	108	580.3284	1158.6422	1158.6431	-0.76	0	59		0.0018	1		K.ISLCDALIVR.S
	99	108	580.3284	1158.6423	1158.6431	-0.65	0	77		2.7e-05	1		K.ISLCDALIVR.S
	99	108	580.3285	1158.6424	1158.6431	-0.55	0	77		2.7e-05	1		K.ISLCDALIVR.S
	99	108	580.3285	1158.6424	1158.6431	-0.55	0	77		2.6e-05	1		K.ISLCDALIVR.S
	99	108	580.3285	1158.6424	1158.6431	-0.55	0	77		2.6e-05	1		K.ISLCDALIVR.S
	99	108	580.3286	1158.6427	1158.6431	-0.34	0	77		2.9e-05	1		K.ISLCDALIVR.S
	99	108	580.3286	1158.6427	1158.6431	-0.34	0	82		8.2e-06	1		K.ISLCDALIVR.S
	99	108	580.3287	1158.6428	1158.6431	-0.24	0	56		0.0033	1		K.ISLCDALIVR.S
	99	108	580.3289	1158.6433	1158.6431	0.19	0	82		7.6e-06	1		K.ISLCDALIVR.S
	99	108	580.3290	1158.6434	1158.6431	0.30	0	72		8.1e-05	1		K.ISLCDALIVR.S
	99	108	580.3291	1158.6436	1158.6431	0.50	0	80		1.2e-05	1		K.ISLCDALIVR.S
	99	108	580.3292	1158.6438	1158.6431	0.61	0	69		0.00015	1		K.ISLCDALIVR.S
	99	108	580.3297	1158.6447	1158.6431	1.45	0	82		8.1e-06	1		K.ISLCDALIVR.S
	175	184	501.7625	1001.5105	1001.5142	-3.69	0	58		0.0023	1		R.NVAQADASVK.A
	175	184	501.7631	1001.5116	1001.5142	-2.53	0	47		0.035	1		R.NVAQADASVK.A
	175	184	501.7634	1001.5123	1001.5142	-1.85	0	59		0.0023	1		R.NVAQADASVK.A
	175	184	501.7636	1001.5127	1001.5142	-1.49	0	49		0.023	1		R.NVAQADASVK.A
	175	184	501.7637	1001.5129	1001.5142	-1.25	0	57		0.0034	1		R.NVAQADASVK.A
	175	184	501.7641	1001.5136	1001.5142	-0.57	0	47		0.031	1		R.NVAQADASVK.A
	175	184	501.7642	1001.5139	1001.5142	-0.27	0	49		0.022	1		R.NVAQADASVK.A
	175	184	501.7642	1001.5139	1001.5142	-0.27	0	52		0.01	1		R.NVAQADASVK.A
	175	184	501.7643	1001.5140	1001.5142	-0.15	0	48		0.03	1		R.NVAQADASVK.A
	175	184	501.7643	1001.5140	1001.5142	-0.15	0	49		0.02	1		R.NVAQADASVK.A
	175	184	501.7645	1001.5145	1001.5142	0.35	0	49		0.02	1		R.NVAQADASVK.A
	175	184	501.7646	1001.5146	1001.5142	0.41	0	59		0.0024	1		R.NVAQADASVK.A
	175	184	501.7646	1001.5146	1001.5142	0.47	0	49		0.02	1		R.NVAQADASVK.A
	175	184	501.7646	1001.5147	1001.5142	0.53	0	47		0.038	1		R.NVAQADASVK.A
	175	184	501.7648	1001.5150	1001.5142	0.89	0	48		0.03	1		R.NVAQADASVK.A
	175	184	501.7648	1001.5150	1001.5142	0.89	0	51		0.014	1		R.NVAQADASVK.A
	175	184	501.7649	1001.5152	1001.5142	1.01	0	46		0.048	1		R.NVAQADASVK.A
	175	184	501.7649	1001.5153	1001.5142	1.13	0	49		0.022	1		R.NVAQADASVK.A
	175	184	501.7662	1001.5179	1001.5142	3.76	0	47		0.038	1		R.NVAQADASVK.A
	193	201	461.2703	920.5261	920.5331	-7.65	0	49		0.015	1		K.YVGVSLVGK.T
	193	201	461.2730	920.5315	920.5331	-1.74	0	45		0.034	1		K.YVGVSLVGK.T
	193	201	461.2731	920.5316	920.5331	-1.67	0	44		0.043	1		K.YVGVSLVGK.T
	193	201	461.2731	920.5316	920.5331	-1.61	0	45		0.032	1		K.YVGVSLVGK.T
	193	201	461.2732	920.5318	920.5331	-1.41	0	47		0.023	1		K.YVGVSLVGK.T
	193	201	461.2732	920.5319	920.5331	-1.35	0	46		0.03	1		K.YVGVSLVGK.T
	211	217	366.2048	730.3951	730.3974	-3.08	0	70		0.00038	1		K.VGTEVAR.R
	226	237	442.2247	1323.6522	1323.6571	-3.74	0	46		0.031	1	U	R.VIAHDPYAPADR.A
	226	237	442.2251	1323.6534	1323.6571	-2.84	0	46		0.028	1	U	R.VIAHDPYAPADR.A
	226	237	442.2253	1323.6540	1323.6571	-2.36	0	45		0.036	1	U	R.VIAHDPYAPADR.A
	226	237	662.8344	1323.6543	1323.6571	-2.17	0	44		0.046	1	U	R.VIAHDPYAPADR.A
	226	237	662.8346	1323.6546	1323.6571	-1.89	0	55		0.0036	1	U	R.VIAHDPYAPADR.A
	226	237	662.8347	1323.6549	1323.6571	-1.70	0	53		0.006	1	U	R.VIAHDPYAPADR.A
	226	237	662.8348	1323.6550	1323.6571	-1.61	0	55		0.0036	1	U	R.VIAHDPYAPADR.A
	226	237	662.8348	1323.6550	1323.6571	-1.61	0	55		0.0036	1	U	R.VIAHDPYAPADR.A
	226	237	662.8348	1323.6551	1323.6571	-1.52	0	55		0.0037	1	U	R.VIAHDPYAPADR.A
	271	279	525.7758	1049.5371	1049.5393	-2.11	0	63		0.00066	1		K.ILNDETFAK.M
	271	279	525.7759	1049.5373	1049.5393	-1.89	0	64		0.00064	1		K.ILNDETFAK.M
	271	279	525.7759	1049.5373	1049.5393	-1.89	0	63		0.00066	1		K.ILNDETFAK.M
	271	279	525.7763	1049.5379	1049.5393	-1.29	0	64		0.0006	1		K.ILNDETFAK.M
	271	279	525.7763	1049.5381	1049.5393	-1.18	0	64		0.00063	1		K.ILNDETFAK.M
	271	279	525.7764	1049.5382	1049.5393	-1.07	0	64		0.00059	1		K.ILNDETFAK.M
	271	279	525.7766	1049.5387	1049.5393	-0.61	0	63		0.00068	1		K.ILNDETFAK.M
	292	302	572.3029	1142.5913	1142.5932	-1.63	0	57		0.0026	1		R.GGVIDEDALVR.A
	292	302	572.3029	1142.5913	1142.5932	-1.63	0	45		0.042	1		R.GGVIDEDALVR.A
	292	302	572.3030	1142.5915	1142.5932	-1.42	0	47		0.022	1		R.GGVIDEDALVR.A
	292	302	572.3032	1142.5919	1142.5932	-1.11	0	46		0.027	1		R.GGVIDEDALVR.A
	292	302	572.3033	1142.5921	1142.5932	-0.90	0	44		0.044	1		R.GGVIDEDALVR.A
	292	302	572.3034	1142.5923	1142.5932	-0.78	0	44		0.042	1		R.GGVIDEDALVR.A
	292	302	572.3035	1142.5924	1142.5932	-0.67	0	57		0.0026	1		R.GGVIDEDALVR.A
	292	302	572.3063	1142.5981	1142.5932	4.35	0	57		0.0027	1		R.GGVIDEDALVR.A
	303	319	568.3137	1701.9192	1701.9301	-6.45	0	70		9.2e-05	1	U	R.ALDAGIVAQAALDVFTK.E
	303	319	851.9695	1701.9244	1701.9301	-3.36	0	67		0.00016	1	U	R.ALDAGIVAQAALDVFTK.E
	303	319	568.3156	1701.9250	1701.9301	-3.01	0	70		7.8e-05	1	U	R.ALDAGIVAQAALDVFTK.E
	303	319	568.3159	1701.9258	1701.9301	-2.57	0	61		0.00068	1	U	R.ALDAGIVAQAALDVFTK.E
	303	319	568.3164	1701.9272	1701.9301	-1.71	0	72		5e-05	1	U	R.ALDAGIVAQAALDVFTK.E
	303	319	568.3171	1701.9296	1701.9301	-0.32	0	56		0.002	1	U	R.ALDAGIVAQAALDVFTK.E
	303	319	568.3177	1701.9312	1701.9301	0.65	0	60		0.00078	1	U	R.ALDAGIVAQAALDVFTK.E
	303	319	568.3195	1701.9366	1701.9301	3.77	0	63		0.00043	1	U	R.ALDAGIVAQAALDVFTK.E
	398	410	599.8594	1197.7042	1197.7081	-3.27	0	73		2.7e-05	1		R.LAVQLVAGGSGVK.N
	398	410	599.8594	1197.7043	1197.7081	-3.17	0	78		8.8e-06	1		R.LAVQLVAGGSGVK.N
	398	410	599.8599	1197.7053	1197.7081	-2.37	0	77		1.2e-05	1		R.LAVQLVAGGSGVK.N
	398	410	599.8600	1197.7054	1197.7081	-2.26	0	82		3.6e-06	1		R.LAVQLVAGGSGVK.N
	398	410	599.8601	1197.7055	1197.7081	-2.16	0	77		1.1e-05	1		R.LAVQLVAGGSGVK.N
	398	410	599.8601	1197.7057	1197.7081	-2.06	0	77		1e-05	1		R.LAVQLVAGGSGVK.N
	398	410	599.8602	1197.7058	1197.7081	-1.96	0	78		8.5e-06	1		R.LAVQLVAGGSGVK.N
	398	410	599.8602	1197.7059	1197.7081	-1.86	0	80		5.1e-06	1		R.LAVQLVAGGSGVK.N
	398	410	599.8603	1197.7060	1197.7081	-1.76	0	84		2.3e-06	1		R.LAVQLVAGGSGVK.N
	398	410	599.8604	1197.7061	1197.7081	-1.65	0	75		1.8e-05	1		R.LAVQLVAGGSGVK.N
	398	410	599.8604	1197.7063	1197.7081	-1.55	0	75		1.7e-05	1		R.LAVQLVAGGSGVK.N
	398	410	599.8604	1197.7063	1197.7081	-1.55	0	77		1e-05	1		R.LAVQLVAGGSGVK.N
	398	410	599.8605	1197.7064	1197.7081	-1.45	0	80		5.7e-06	1		R.LAVQLVAGGSGVK.N
	398	410	599.8605	1197.7065	1197.7081	-1.35	0	76		1.3e-05	1		R.LAVQLVAGGSGVK.N
	398	410	599.8606	1197.7066	1197.7081	-1.24	0	72		3.3e-05	1		R.LAVQLVAGGSGVK.N
	398	410	599.8606	1197.7066	1197.7081	-1.24	0	81		4.1e-06	1		R.LAVQLVAGGSGVK.N
	398	410	599.8607	1197.7068	1197.7081	-1.14	0	74		2.4e-05	1		R.LAVQLVAGGSGVK.N
	398	410	599.8607	1197.7068	1197.7081	-1.14	0	71		4.2e-05	1		R.LAVQLVAGGSGVK.N
	398	410	599.8607	1197.7068	1197.7081	-1.14	0	73		2.8e-05	1		R.LAVQLVAGGSGVK.N
	398	410	599.8607	1197.7068	1197.7081	-1.14	0	80		5.7e-06	1		R.LAVQLVAGGSGVK.N
	398	410	599.8607	1197.7069	1197.7081	-1.04	0	74		2.4e-05	1		R.LAVQLVAGGSGVK.N
	398	410	599.8607	1197.7069	1197.7081	-1.04	0	73		2.7e-05	1		R.LAVQLVAGGSGVK.N
	398	410	599.8607	1197.7069	1197.7081	-1.04	0	78		8.4e-06	1		R.LAVQLVAGGSGVK.N
	398	410	599.8608	1197.7070	1197.7081	-0.94	0	69		6.3e-05	1		R.LAVQLVAGGSGVK.N
	398	410	599.8608	1197.7070	1197.7081	-0.94	0	75		1.7e-05	1		R.LAVQLVAGGSGVK.N
	398	410	599.8608	1197.7070	1197.7081	-0.94	0	73		2.9e-05	1		R.LAVQLVAGGSGVK.N
	398	410	599.8608	1197.7071	1197.7081	-0.84	0	93		2.8e-07	1		R.LAVQLVAGGSGVK.N
	398	410	599.8609	1197.7072	1197.7081	-0.74	0	70		5.3e-05	1		R.LAVQLVAGGSGVK.N
	398	410	599.8610	1197.7074	1197.7081	-0.64	0	71		4.4e-05	1		R.LAVQLVAGGSGVK.N
	398	410	599.8610	1197.7074	1197.7081	-0.64	0	73		2.5e-05	1		R.LAVQLVAGGSGVK.N
	398	410	599.8610	1197.7074	1197.7081	-0.64	0	78		8.7e-06	1		R.LAVQLVAGGSGVK.N
	398	410	599.8610	1197.7074	1197.7081	-0.64	0	74		2e-05	1		R.LAVQLVAGGSGVK.N
	398	410	599.8611	1197.7076	1197.7081	-0.44	0	72		3.3e-05	1		R.LAVQLVAGGSGVK.N
	398	410	599.8611	1197.7077	1197.7081	-0.32	0	75		1.7e-05	1		R.LAVQLVAGGSGVK.N
	398	410	599.8612	1197.7079	1197.7081	-0.22	0	80		6.2e-06	1		R.LAVQLVAGGSGVK.N
	398	410	599.8613	1197.7080	1197.7081	-0.12	0	75		2e-05	1		R.LAVQLVAGGSGVK.N
	398	410	599.8613	1197.7081	1197.7081	-0.018	0	74		2.1e-05	1		R.LAVQLVAGGSGVK.N
	398	410	599.8614	1197.7082	1197.7081	0.082	0	72		3.7e-05	1		R.LAVQLVAGGSGVK.N
	398	410	599.8614	1197.7082	1197.7081	0.082	0	77		1.2e-05	1		R.LAVQLVAGGSGVK.N
	398	410	599.8616	1197.7086	1197.7081	0.38	0	76		1.3e-05	1		R.LAVQLVAGGSGVK.N
	398	410	599.8616	1197.7086	1197.7081	0.38	0	75		1.5e-05	1		R.LAVQLVAGGSGVK.N
	398	410	599.8621	1197.7097	1197.7081	1.30	0	80		4.9e-06	1		R.LAVQLVAGGSGVK.N
	421	428	453.7103	905.4060	905.4090	-3.37	0	59		0.00089	1	U	R.ATDDLDTR.L
	421	428	453.7104	905.4062	905.4090	-3.17	0	55		0.0027	1	U	R.ATDDLDTR.L
	421	428	453.7105	905.4064	905.4090	-2.91	0	55		0.0027	1	U	R.ATDDLDTR.L
	421	428	453.7106	905.4066	905.4090	-2.71	0	55		0.0027	1	U	R.ATDDLDTR.L
	421	428	453.7106	905.4066	905.4090	-2.64	0	55		0.0025	1	U	R.ATDDLDTR.L
	421	428	453.7107	905.4068	905.4090	-2.51	0	55		0.003	1	U	R.ATDDLDTR.L
	421	428	453.7111	905.4077	905.4090	-1.43	0	60		0.00091	1	U	R.ATDDLDTR.L
	421	428	453.7112	905.4079	905.4090	-1.30	0	60		0.0009	1	U	R.ATDDLDTR.L
	421	428	453.7113	905.4080	905.4090	-1.16	0	55		0.0028	1	U	R.ATDDLDTR.L
	437	457	760.0675	2277.1807	2277.1893	-3.77	0	79		9.4e-06	1	U	K.GIIEPISDVYVNLVNADFTAK.Q
	437	457	1139.6001	2277.1856	2277.1893	-1.58	0	76		1.9e-05	1	U	K.GIIEPISDVYVNLVNADFTAK.Q
	437	457	1139.6002	2277.1859	2277.1893	-1.48	0	45		0.026	1	U	K.GIIEPISDVYVNLVNADFTAK.Q
	437	457	1139.6013	2277.1881	2277.1893	-0.51	0	97		1.4e-07	1	U	K.GIIEPISDVYVNLVNADFTAK.Q
	437	457	1139.6019	2277.1893	2277.1893	0.023	0	73		3.5e-05	1	U	K.GIIEPISDVYVNLVNADFTAK.Q
	437	457	760.0704	2277.1895	2277.1893	0.091	0	63		0.0004	1	U	K.GIIEPISDVYVNLVNADFTAK.Q
	437	457	1139.6023	2277.1900	2277.1893	0.34	0	97		1.5e-07	1	U	K.GIIEPISDVYVNLVNADFTAK.Q
	437	457	760.0715	2277.1926	2277.1893	1.46	0	79		8.2e-06	1	U	K.GIIEPISDVYVNLVNADFTAK.Q
	492	503	620.8044	1239.5943	1239.5983	-3.19	0	76		2.6e-05	1	U	K.FASSLSESGEVK.V
	492	503	620.8046	1239.5947	1239.5983	-2.88	0	75		3.3e-05	1	U	K.FASSLSESGEVK.V
	492	503	620.8047	1239.5948	1239.5983	-2.79	0	78		1.5e-05	1	U	K.FASSLSESGEVK.V
	492	503	620.8048	1239.5951	1239.5983	-2.59	0	69		0.00011	1	U	K.FASSLSESGEVK.V
	492	503	620.8049	1239.5952	1239.5983	-2.50	0	80		1e-05	1	U	K.FASSLSESGEVK.V
	492	503	620.8051	1239.5955	1239.5983	-2.21	0	74		3.5e-05	1	U	K.FASSLSESGEVK.V
	492	503	620.8051	1239.5955	1239.5983	-2.21	0	71		7.9e-05	1	U	K.FASSLSESGEVK.V
	492	503	620.8052	1239.5958	1239.5983	-2.00	0	66		0.00023	1	U	K.FASSLSESGEVK.V
	492	503	620.8052	1239.5959	1239.5983	-1.90	0	74		3.5e-05	1	U	K.FASSLSESGEVK.V
	492	503	620.8053	1239.5960	1239.5983	-1.80	0	76		2.5e-05	1	U	K.FASSLSESGEVK.V
	492	503	620.8053	1239.5960	1239.5983	-1.80	0	86		2.7e-06	1	U	K.FASSLSESGEVK.V
	492	503	620.8053	1239.5960	1239.5983	-1.80	0	84		4.2e-06	1	U	K.FASSLSESGEVK.V
	492	503	620.8054	1239.5962	1239.5983	-1.71	0	72		5.4e-05	1	U	K.FASSLSESGEVK.V
	492	503	620.8054	1239.5962	1239.5983	-1.71	0	72		6.3e-05	1	U	K.FASSLSESGEVK.V
	492	503	620.8054	1239.5962	1239.5983	-1.71	0	64		0.00036	1	U	K.FASSLSESGEVK.V
	492	503	620.8054	1239.5962	1239.5983	-1.71	0	69		0.00011	1	U	K.FASSLSESGEVK.V
	492	503	620.8055	1239.5964	1239.5983	-1.51	0	46		0.023	1	U	K.FASSLSESGEVK.V
	492	503	620.8055	1239.5965	1239.5983	-1.41	0	77		2e-05	1	U	K.FASSLSESGEVK.V
	492	503	620.8055	1239.5965	1239.5983	-1.41	0	83		5.4e-06	1	U	K.FASSLSESGEVK.V
	492	503	620.8055	1239.5965	1239.5983	-1.41	0	80		1e-05	1	U	K.FASSLSESGEVK.V
	492	503	620.8056	1239.5966	1239.5983	-1.32	0	85		3e-06	1	U	K.FASSLSESGEVK.V
	492	503	620.8056	1239.5966	1239.5983	-1.32	0	68		0.00014	1	U	K.FASSLSESGEVK.V
	492	503	620.8057	1239.5969	1239.5983	-1.11	0	80		1e-05	1	U	K.FASSLSESGEVK.V
	492	503	620.8057	1239.5969	1239.5983	-1.11	0	78		1.6e-05	1	U	K.FASSLSESGEVK.V
	492	503	620.8058	1239.5971	1239.5983	-0.91	0	70		0.0001	1	U	K.FASSLSESGEVK.V
	492	503	620.8058	1239.5971	1239.5983	-0.91	0	55		0.0029	1	U	K.FASSLSESGEVK.V
	492	503	620.8058	1239.5971	1239.5983	-0.91	0	85		3e-06	1	U	K.FASSLSESGEVK.V
	492	503	620.8060	1239.5974	1239.5983	-0.72	0	68		0.00017	1	U	K.FASSLSESGEVK.V
	492	503	620.8061	1239.5976	1239.5983	-0.53	0	69		0.00012	1	U	K.FASSLSESGEVK.V
	492	503	620.8061	1239.5976	1239.5983	-0.53	0	80		9.1e-06	1	U	K.FASSLSESGEVK.V
	492	503	620.8061	1239.5976	1239.5983	-0.53	0	61		0.00077	1	U	K.FASSLSESGEVK.V
	492	503	620.8062	1239.5977	1239.5983	-0.43	0	75		3e-05	1	U	K.FASSLSESGEVK.V
	492	503	620.8062	1239.5977	1239.5983	-0.43	0	67		0.00021	1	U	K.FASSLSESGEVK.V
	492	503	620.8062	1239.5977	1239.5983	-0.43	0	74		3.7e-05	1	U	K.FASSLSESGEVK.V
	492	503	620.8062	1239.5977	1239.5983	-0.43	0	68		0.00015	1	U	K.FASSLSESGEVK.V
	492	503	620.8063	1239.5981	1239.5983	-0.12	0	73		4.9e-05	1	U	K.FASSLSESGEVK.V
	492	503	620.8064	1239.5982	1239.5983	-0.027	0	70		0.00011	1	U	K.FASSLSESGEVK.V
	492	503	620.8065	1239.5984	1239.5983	0.069	0	73		5e-05	1	U	K.FASSLSESGEVK.V
	492	503	620.8065	1239.5985	1239.5983	0.17	0	71		7.3e-05	1	U	K.FASSLSESGEVK.V
	492	503	620.8066	1239.5986	1239.5983	0.26	0	59		0.0013	1	U	K.FASSLSESGEVK.V
	492	503	620.8066	1239.5986	1239.5983	0.26	0	63		0.00053	1	U	K.FASSLSESGEVK.V
	492	503	620.8066	1239.5986	1239.5983	0.26	0	66		0.00025	1	U	K.FASSLSESGEVK.V
	492	503	620.8067	1239.5988	1239.5983	0.46	0	90		1.1e-06	1	U	K.FASSLSESGEVK.V
	492	503	620.8068	1239.5990	1239.5983	0.55	0	72		6.2e-05	1	U	K.FASSLSESGEVK.V
	492	503	620.8069	1239.5992	1239.5983	0.75	0	72		6e-05	1	U	K.FASSLSESGEVK.V
	492	503	620.8072	1239.5998	1239.5983	1.25	0	71		8.4e-05	1	U	K.FASSLSESGEVK.V
	492	503	620.8072	1239.5999	1239.5983	1.34	0	72		5.9e-05	1	U	K.FASSLSESGEVK.V
	492	503	620.8075	1239.6004	1239.5983	1.75	0	74		4.3e-05	1	U	K.FASSLSESGEVK.V
	492	503	620.8083	1239.6020	1239.5983	3.02	0	74		4.3e-05	1	U	K.FASSLSESGEVK.V
	508	517	365.2160	1092.6263	1092.6291	-2.64	1	42		0.034	1		K.VKDGVPHLTK.V
	508	517	365.2161	1092.6264	1092.6291	-2.48	1	46		0.014	1		K.VKDGVPHLTK.V
	508	517	547.3205	1092.6264	1092.6291	-2.47	1	57		0.0013	1		K.VKDGVPHLTK.V
	508	517	365.2161	1092.6266	1092.6291	-2.37	1	46		0.014	1		K.VKDGVPHLTK.V
	508	517	365.2162	1092.6267	1092.6291	-2.20	1	45		0.021	1		K.VKDGVPHLTK.V
	508	517	365.2162	1092.6268	1092.6291	-2.12	1	46		0.014	1		K.VKDGVPHLTK.V
	508	517	547.3207	1092.6269	1092.6291	-2.03	1	63		0.00034	1		K.VKDGVPHLTK.V
	508	517	365.2164	1092.6273	1092.6291	-1.71	1	52		0.0039	1		K.VKDGVPHLTK.V
	508	517	547.3209	1092.6273	1092.6291	-1.70	1	43		0.029	1		K.VKDGVPHLTK.V
	510	517	433.7391	865.4637	865.4658	-2.37	0	51		0.0085	1		K.DGVPHLTK.V
	510	517	433.7394	865.4641	865.4658	-1.88	0	44		0.043	1		K.DGVPHLTK.V
	510	517	433.7394	865.4642	865.4658	-1.81	0	44		0.038	1		K.DGVPHLTK.V
	510	517	433.7394	865.4643	865.4658	-1.74	0	53		0.0051	1		K.DGVPHLTK.V
	536	564	1013.1509	3036.4310	3036.4645	-11.0	0	74		2.3e-05	1	U	R.QVDQPGMIGTVGSILGESNVNVNFMSVGR.I + 2 Oxidation (M)
	536	564	1013.1616	3036.4629	3036.4645	-0.55	0	98		9.4e-08	1	U	R.QVDQPGMIGTVGSILGESNVNVNFMSVGR.I + 2 Oxidation (M)
	536	564	1013.1632	3036.4678	3036.4645	1.08	0	90		7.1e-07	1	U	R.QVDQPGMIGTVGSILGESNVNVNFMSVGR.I + 2 Oxidation (M)
	536	564	1013.1633	3036.4680	3036.4645	1.14	0	98		9.6e-08	1	U	R.QVDQPGMIGTVGSILGESNVNVNFMSVGR.I + 2 Oxidation (M)
	536	564	1013.1636	3036.4689	3036.4645	1.44	0	97		1.3e-07	1	U	R.QVDQPGMIGTVGSILGESNVNVNFMSVGR.I + 2 Oxidation (M)
	584	588	309.6946	617.3746	617.3748	-0.31	1	44		0.041	1		K.ETLKK.I
	584	588	309.6947	617.3748	617.3748	0.075	1	44		0.041	1		K.ETLKK.I
	584	588	309.6948	617.3750	617.3748	0.27	1	44		0.041	1		K.ETLKK.I
	584	588	309.6949	617.3752	617.3748	0.69	1	44		0.04	1		K.ETLKK.I
9	99	108	580.3259	1158.6372	1158.6431	-5.07	0	82	42	7.8e-06	1		K.ISLCDALIVR.S	15
	99	108	580.3261	1158.6375	1158.6431	-4.76	0	77		2.5e-05	1		K.ISLCDALIVR.S
	99	108	580.3261	1158.6377	1158.6431	-4.66	0	82		7.5e-06	1		K.ISLCDALIVR.S
	99	108	580.3261	1158.6377	1158.6431	-4.66	0	64		0.00056	1		K.ISLCDALIVR.S
	99	108	580.3264	1158.6381	1158.6431	-4.24	0	72		7.8e-05	1		K.ISLCDALIVR.S
	99	108	580.3264	1158.6383	1158.6431	-4.12	0	82		7.8e-06	1		K.ISLCDALIVR.S
	99	108	580.3267	1158.6389	1158.6431	-3.61	0	77		2.7e-05	1		K.ISLCDALIVR.S
	99	108	580.3267	1158.6389	1158.6431	-3.61	0	72		7.8e-05	1		K.ISLCDALIVR.S
	99	108	580.3267	1158.6389	1158.6431	-3.61	0	67		0.00026	1		K.ISLCDALIVR.S
	99	108	580.3268	1158.6390	1158.6431	-3.50	0	70		0.00012	1		K.ISLCDALIVR.S
	99	108	580.3269	1158.6392	1158.6431	-3.30	0	82		7.2e-06	1		K.ISLCDALIVR.S
	99	108	580.3270	1158.6394	1158.6431	-3.17	0	77		2.6e-05	1		K.ISLCDALIVR.S
	99	108	580.3270	1158.6394	1158.6431	-3.17	0	78		2.3e-05	1		K.ISLCDALIVR.S
	99	108	580.3271	1158.6396	1158.6431	-2.97	0	83		7.1e-06	1		K.ISLCDALIVR.S
	99	108	580.3271	1158.6397	1158.6431	-2.86	0	76		3.4e-05	1		K.ISLCDALIVR.S
	99	108	580.3272	1158.6399	1158.6431	-2.76	0	82		7.9e-06	1		K.ISLCDALIVR.S
	99	108	580.3272	1158.6399	1158.6431	-2.76	0	73		6.4e-05	1		K.ISLCDALIVR.S
	99	108	580.3272	1158.6399	1158.6431	-2.76	0	82		7.3e-06	1		K.ISLCDALIVR.S
	99	108	580.3273	1158.6400	1158.6431	-2.66	0	73		6.9e-05	1		K.ISLCDALIVR.S
	99	108	580.3273	1158.6401	1158.6431	-2.55	0	72		7.2e-05	1		K.ISLCDALIVR.S
	99	108	580.3274	1158.6402	1158.6431	-2.45	0	77		2.6e-05	1		K.ISLCDALIVR.S
	99	108	580.3274	1158.6403	1158.6431	-2.35	0	69		0.00017	1		K.ISLCDALIVR.S
	99	108	580.3276	1158.6406	1158.6431	-2.12	0	77		2.7e-05	1		K.ISLCDALIVR.S
	99	108	580.3276	1158.6406	1158.6431	-2.12	0	82		8e-06	1		K.ISLCDALIVR.S
	99	108	580.3276	1158.6407	1158.6431	-2.02	0	72		8.3e-05	1		K.ISLCDALIVR.S
	99	108	580.3276	1158.6407	1158.6431	-2.02	0	77		2.6e-05	1		K.ISLCDALIVR.S
	99	108	580.3277	1158.6408	1158.6431	-1.91	0	77		2.7e-05	1		K.ISLCDALIVR.S
	99	108	580.3278	1158.6410	1158.6431	-1.81	0	82		7.4e-06	1		K.ISLCDALIVR.S
	99	108	580.3278	1158.6411	1158.6431	-1.71	0	83		7.1e-06	1		K.ISLCDALIVR.S
	99	108	580.3279	1158.6412	1158.6431	-1.60	0	66		0.00032	1		K.ISLCDALIVR.S
	99	108	580.3279	1158.6412	1158.6431	-1.60	0	76		3.1e-05	1		K.ISLCDALIVR.S
	99	108	580.3279	1158.6412	1158.6431	-1.60	0	77		2.7e-05	1		K.ISLCDALIVR.S
	99	108	580.3279	1158.6412	1158.6431	-1.60	0	82		7.8e-06	1		K.ISLCDALIVR.S
	99	108	580.3279	1158.6413	1158.6431	-1.50	0	58		0.002	1		K.ISLCDALIVR.S
	99	108	580.3279	1158.6413	1158.6431	-1.50	0	82		8.3e-06	1		K.ISLCDALIVR.S
	99	108	580.3280	1158.6414	1158.6431	-1.40	0	61		0.0011	1		K.ISLCDALIVR.S
	99	108	580.3281	1158.6416	1158.6431	-1.29	0	69		0.00018	1		K.ISLCDALIVR.S
	99	108	580.3282	1158.6418	1158.6431	-1.07	0	67		0.00027	1		K.ISLCDALIVR.S
	99	108	580.3283	1158.6419	1158.6431	-0.96	0	82		8.3e-06	1		K.ISLCDALIVR.S
	99	108	580.3283	1158.6421	1158.6431	-0.86	0	59		0.0016	1		K.ISLCDALIVR.S
	99	108	580.3289	1158.6432	1158.6431	0.088	0	70		0.00012	1		K.ISLCDALIVR.S
	99	108	580.3290	1158.6434	1158.6431	0.30	0	60		0.0014	1		K.ISLCDALIVR.S
	99	108	580.3292	1158.6438	1158.6431	0.61	0	70		0.00014	1		K.ISLCDALIVR.S
	99	108	580.3297	1158.6447	1158.6431	1.45	0	50		0.014	1		K.ISLCDALIVR.S
	175	184	501.7626	1001.5106	1001.5142	-3.51	0	55		0.0051	1		R.NVAQADASVK.A
	175	184	501.7626	1001.5106	1001.5142	-3.51	0	47		0.037	1		R.NVAQADASVK.A
	175	184	501.7628	1001.5110	1001.5142	-3.13	0	57		0.0037	1		R.NVAQADASVK.A
	175	184	501.7628	1001.5111	1001.5142	-3.07	0	57		0.0037	1		R.NVAQADASVK.A
	175	184	501.7628	1001.5111	1001.5142	-3.07	0	47		0.036	1		R.NVAQADASVK.A
	175	184	501.7629	1001.5113	1001.5142	-2.89	0	55		0.0048	1		R.NVAQADASVK.A
	175	184	501.7631	1001.5116	1001.5142	-2.59	0	46		0.045	1		R.NVAQADASVK.A
	175	184	501.7631	1001.5117	1001.5142	-2.47	0	52		0.0095	1		R.NVAQADASVK.A
	175	184	501.7632	1001.5118	1001.5142	-2.35	0	56		0.0043	1		R.NVAQADASVK.A
	175	184	501.7632	1001.5119	1001.5142	-2.29	0	52		0.0095	1		R.NVAQADASVK.A
	175	184	501.7633	1001.5120	1001.5142	-2.15	0	46		0.045	1		R.NVAQADASVK.A
	175	184	501.7633	1001.5121	1001.5142	-2.09	0	52		0.0095	1		R.NVAQADASVK.A
	175	184	501.7636	1001.5125	1001.5142	-1.61	0	53		0.0085	1		R.NVAQADASVK.A
	175	184	501.7636	1001.5126	1001.5142	-1.55	0	53		0.0094	1		R.NVAQADASVK.A
	175	184	501.7636	1001.5126	1001.5142	-1.55	0	53		0.0092	1		R.NVAQADASVK.A
	175	184	501.7636	1001.5126	1001.5142	-1.55	0	50		0.016	1		R.NVAQADASVK.A
	175	184	501.7636	1001.5127	1001.5142	-1.49	0	57		0.0037	1		R.NVAQADASVK.A
	175	184	501.7637	1001.5128	1001.5142	-1.37	0	53		0.009	1		R.NVAQADASVK.A
	175	184	501.7637	1001.5128	1001.5142	-1.37	0	49		0.021	1		R.NVAQADASVK.A
	175	184	501.7637	1001.5129	1001.5142	-1.25	0	57		0.0037	1		R.NVAQADASVK.A
	175	184	501.7637	1001.5129	1001.5142	-1.25	0	56		0.0045	1		R.NVAQADASVK.A
	175	184	501.7638	1001.5130	1001.5142	-1.19	0	47		0.036	1		R.NVAQADASVK.A
	175	184	501.7638	1001.5130	1001.5142	-1.13	0	46		0.045	1		R.NVAQADASVK.A
	175	184	501.7639	1001.5133	1001.5142	-0.87	0	55		0.0052	1		R.NVAQADASVK.A
	175	184	501.7639	1001.5133	1001.5142	-0.87	0	53		0.0089	1		R.NVAQADASVK.A
	175	184	501.7640	1001.5135	1001.5142	-0.69	0	53		0.0092	1		R.NVAQADASVK.A
	175	184	501.7640	1001.5135	1001.5142	-0.63	0	53		0.0082	1		R.NVAQADASVK.A
	175	184	501.7641	1001.5136	1001.5142	-0.57	0	53		0.0092	1		R.NVAQADASVK.A
	175	184	501.7641	1001.5136	1001.5142	-0.51	0	53		0.0088	1		R.NVAQADASVK.A
	175	184	501.7641	1001.5137	1001.5142	-0.45	0	53		0.009	1		R.NVAQADASVK.A
	175	184	501.7641	1001.5137	1001.5142	-0.45	0	53		0.0087	1		R.NVAQADASVK.A
	175	184	501.7642	1001.5138	1001.5142	-0.39	0	48		0.025	1		R.NVAQADASVK.A
	175	184	501.7642	1001.5138	1001.5142	-0.33	0	52		0.0095	1		R.NVAQADASVK.A
	175	184	501.7642	1001.5138	1001.5142	-0.33	0	53		0.0092	1		R.NVAQADASVK.A
	175	184	501.7643	1001.5139	1001.5142	-0.21	0	47		0.037	1		R.NVAQADASVK.A
	175	184	501.7643	1001.5140	1001.5142	-0.15	0	50		0.015	1		R.NVAQADASVK.A
	175	184	501.7643	1001.5140	1001.5142	-0.15	0	53		0.0086	1		R.NVAQADASVK.A
	175	184	501.7643	1001.5141	1001.5142	-0.032	0	53		0.0093	1		R.NVAQADASVK.A
	175	184	501.7643	1001.5141	1001.5142	-0.032	0	47		0.036	1		R.NVAQADASVK.A
	175	184	501.7644	1001.5142	1001.5142	0.028	0	47		0.037	1		R.NVAQADASVK.A
	175	184	501.7644	1001.5142	1001.5142	0.028	0	53		0.0088	1		R.NVAQADASVK.A
	175	184	501.7644	1001.5142	1001.5142	0.088	0	50		0.015	1		R.NVAQADASVK.A
	175	184	501.7644	1001.5142	1001.5142	0.088	0	53		0.0092	1		R.NVAQADASVK.A
	175	184	501.7645	1001.5144	1001.5142	0.23	0	47		0.034	1		R.NVAQADASVK.A
	175	184	501.7645	1001.5144	1001.5142	0.29	0	53		0.0091	1		R.NVAQADASVK.A
	175	184	501.7645	1001.5144	1001.5142	0.29	0	53		0.0093	1		R.NVAQADASVK.A
	175	184	501.7645	1001.5145	1001.5142	0.35	0	53		0.0095	1		R.NVAQADASVK.A
	175	184	501.7645	1001.5145	1001.5142	0.35	0	53		0.009	1		R.NVAQADASVK.A
	175	184	501.7646	1001.5146	1001.5142	0.41	0	54		0.0074	1		R.NVAQADASVK.A
	175	184	501.7646	1001.5146	1001.5142	0.47	0	50		0.016	1		R.NVAQADASVK.A
	175	184	501.7646	1001.5147	1001.5142	0.53	0	53		0.0089	1		R.NVAQADASVK.A
	175	184	501.7647	1001.5147	1001.5142	0.59	0	53		0.0093	1		R.NVAQADASVK.A
	175	184	501.7648	1001.5150	1001.5142	0.89	0	53		0.0096	1		R.NVAQADASVK.A
	175	184	501.7651	1001.5157	1001.5142	1.57	0	47		0.037	1		R.NVAQADASVK.A
	193	201	461.2710	920.5274	920.5331	-6.17	0	48		0.018	1		K.YVGVSLVGK.T
	193	201	461.2716	920.5287	920.5331	-4.84	0	48		0.017	1		K.YVGVSLVGK.T
	193	201	461.2716	920.5287	920.5331	-4.78	0	48		0.018	1		K.YVGVSLVGK.T
	193	201	461.2720	920.5294	920.5331	-4.06	0	48		0.017	1		K.YVGVSLVGK.T
	193	201	461.2721	920.5296	920.5331	-3.80	0	53		0.0057	1		K.YVGVSLVGK.T
	193	201	461.2722	920.5298	920.5331	-3.65	0	47		0.022	1		K.YVGVSLVGK.T
	193	201	461.2722	920.5299	920.5331	-3.45	0	47		0.023	1		K.YVGVSLVGK.T
	193	201	461.2723	920.5300	920.5331	-3.39	0	48		0.019	1		K.YVGVSLVGK.T
	193	201	461.2726	920.5307	920.5331	-2.61	0	47		0.024	1		K.YVGVSLVGK.T
	193	201	461.2726	920.5307	920.5331	-2.61	0	46		0.031	1		K.YVGVSLVGK.T
	193	201	461.2727	920.5308	920.5331	-2.54	0	48		0.018	1		K.YVGVSLVGK.T
	193	201	461.2728	920.5310	920.5331	-2.26	0	44		0.046	1		K.YVGVSLVGK.T
	193	201	461.2731	920.5316	920.5331	-1.61	0	48		0.018	1		K.YVGVSLVGK.T
	193	201	461.2731	920.5316	920.5331	-1.61	0	46		0.031	1		K.YVGVSLVGK.T
	193	201	461.2734	920.5323	920.5331	-0.93	0	44		0.041	1		K.YVGVSLVGK.T
	193	201	461.2736	920.5327	920.5331	-0.41	0	47		0.026	1		K.YVGVSLVGK.T
	193	201	461.2737	920.5329	920.5331	-0.28	0	46		0.033	1		K.YVGVSLVGK.T
	211	217	366.2044	730.3942	730.3974	-4.31	0	69		0.00042	1		K.VGTEVAR.R
	211	217	366.2045	730.3944	730.3974	-4.06	0	58		0.0054	1		K.VGTEVAR.R
	226	237	442.2248	1323.6525	1323.6571	-3.47	0	45		0.036	1	U	R.VIAHDPYAPADR.A
	226	237	662.8338	1323.6530	1323.6571	-3.09	0	55		0.0038	1	U	R.VIAHDPYAPADR.A
	226	237	662.8339	1323.6532	1323.6571	-3.00	0	45		0.039	1	U	R.VIAHDPYAPADR.A
	226	237	442.2250	1323.6532	1323.6571	-2.97	0	49		0.014	1	U	R.VIAHDPYAPADR.A
	226	237	662.8340	1323.6534	1323.6571	-2.82	0	46		0.03	1	U	R.VIAHDPYAPADR.A
	226	237	662.8341	1323.6535	1323.6571	-2.71	0	53		0.0059	1	U	R.VIAHDPYAPADR.A
	226	237	442.2251	1323.6536	1323.6571	-2.70	0	45		0.036	1	U	R.VIAHDPYAPADR.A
	226	237	662.8342	1323.6539	1323.6571	-2.44	0	58		0.0021	1	U	R.VIAHDPYAPADR.A
	226	237	662.8343	1323.6541	1323.6571	-2.26	0	58		0.0019	1	U	R.VIAHDPYAPADR.A
	226	237	442.2256	1323.6549	1323.6571	-1.72	0	46		0.033	1	U	R.VIAHDPYAPADR.A
	226	237	662.8352	1323.6559	1323.6571	-0.96	0	55		0.0037	1	U	R.VIAHDPYAPADR.A
	271	279	525.7750	1049.5355	1049.5393	-3.64	0	63		0.00068	1		K.ILNDETFAK.M
	271	279	525.7753	1049.5360	1049.5393	-3.16	0	63		0.00067	1		K.ILNDETFAK.M
	271	279	525.7753	1049.5360	1049.5393	-3.16	0	63		0.00068	1		K.ILNDETFAK.M
	271	279	525.7756	1049.5367	1049.5393	-2.48	0	64		0.00056	1		K.ILNDETFAK.M
	292	302	572.3024	1142.5903	1142.5932	-2.49	0	61		0.00093	1		R.GGVIDEDALVR.A
	292	302	572.3025	1142.5904	1142.5932	-2.39	0	45		0.038	1		R.GGVIDEDALVR.A
	292	302	572.3029	1142.5912	1142.5932	-1.74	0	49		0.016	1		R.GGVIDEDALVR.A
	292	302	572.3029	1142.5913	1142.5932	-1.63	0	45		0.038	1		R.GGVIDEDALVR.A
	292	302	572.3030	1142.5914	1142.5932	-1.53	0	57		0.0027	1		R.GGVIDEDALVR.A
	292	302	572.3030	1142.5914	1142.5932	-1.53	0	46		0.027	1		R.GGVIDEDALVR.A
	292	302	572.3030	1142.5915	1142.5932	-1.42	0	61		0.00092	1		R.GGVIDEDALVR.A
	292	302	572.3031	1142.5916	1142.5932	-1.32	0	57		0.0026	1		R.GGVIDEDALVR.A
	292	302	572.3044	1142.5942	1142.5932	0.92	0	50		0.012	1		R.GGVIDEDALVR.A
	398	410	599.8591	1197.7036	1197.7081	-3.79	0	69		7.5e-05	1		R.LAVQLVAGGSGVK.N
	398	410	599.8593	1197.7041	1197.7081	-3.39	0	75		1.9e-05	1		R.LAVQLVAGGSGVK.N
	398	410	599.8599	1197.7052	1197.7081	-2.47	0	75		1.8e-05	1		R.LAVQLVAGGSGVK.N
	398	410	599.8600	1197.7054	1197.7081	-2.26	0	75		1.7e-05	1		R.LAVQLVAGGSGVK.N
	398	410	599.8601	1197.7057	1197.7081	-2.06	0	66		0.00016	1		R.LAVQLVAGGSGVK.N
	398	410	599.8601	1197.7057	1197.7081	-2.06	0	74		2.5e-05	1		R.LAVQLVAGGSGVK.N
	398	410	599.8601	1197.7057	1197.7081	-2.06	0	75		1.7e-05	1		R.LAVQLVAGGSGVK.N
	398	410	599.8601	1197.7057	1197.7081	-2.06	0	76		1.3e-05	1		R.LAVQLVAGGSGVK.N
	398	410	599.8602	1197.7058	1197.7081	-1.96	0	67		0.00011	1		R.LAVQLVAGGSGVK.N
	398	410	599.8602	1197.7059	1197.7081	-1.86	0	71		4.9e-05	1		R.LAVQLVAGGSGVK.N
	398	410	599.8602	1197.7059	1197.7081	-1.86	0	73		3e-05	1		R.LAVQLVAGGSGVK.N
	398	410	599.8602	1197.7059	1197.7081	-1.86	0	88		9e-07	1		R.LAVQLVAGGSGVK.N
	398	410	599.8603	1197.7060	1197.7081	-1.76	0	76		1.2e-05	1		R.LAVQLVAGGSGVK.N
	398	410	599.8603	1197.7060	1197.7081	-1.76	0	75		1.7e-05	1		R.LAVQLVAGGSGVK.N
	398	410	599.8603	1197.7060	1197.7081	-1.76	0	78		9.4e-06	1		R.LAVQLVAGGSGVK.N
	398	410	599.8604	1197.7061	1197.7081	-1.65	0	75		1.7e-05	1		R.LAVQLVAGGSGVK.N
	398	410	599.8604	1197.7061	1197.7081	-1.65	0	77		1.2e-05	1		R.LAVQLVAGGSGVK.N
	398	410	599.8604	1197.7063	1197.7081	-1.55	0	75		1.7e-05	1		R.LAVQLVAGGSGVK.N
	398	410	599.8604	1197.7063	1197.7081	-1.55	0	75		1.7e-05	1		R.LAVQLVAGGSGVK.N
	398	410	599.8604	1197.7063	1197.7081	-1.55	0	73		2.9e-05	1		R.LAVQLVAGGSGVK.N
	398	410	599.8604	1197.7063	1197.7081	-1.55	0	75		1.7e-05	1		R.LAVQLVAGGSGVK.N
	398	410	599.8604	1197.7063	1197.7081	-1.55	0	90		5.4e-07	1		R.LAVQLVAGGSGVK.N
	398	410	599.8605	1197.7064	1197.7081	-1.45	0	75		1.7e-05	1		R.LAVQLVAGGSGVK.N
	398	410	599.8605	1197.7064	1197.7081	-1.45	0	74		2.4e-05	1		R.LAVQLVAGGSGVK.N
	398	410	599.8605	1197.7065	1197.7081	-1.35	0	75		1.9e-05	1		R.LAVQLVAGGSGVK.N
	398	410	599.8606	1197.7066	1197.7081	-1.24	0	74		2.4e-05	1		R.LAVQLVAGGSGVK.N
	398	410	599.8606	1197.7066	1197.7081	-1.24	0	76		1.3e-05	1		R.LAVQLVAGGSGVK.N
	398	410	599.8607	1197.7068	1197.7081	-1.14	0	75		1.7e-05	1		R.LAVQLVAGGSGVK.N
	398	410	599.8607	1197.7068	1197.7081	-1.14	0	75		1.7e-05	1		R.LAVQLVAGGSGVK.N
	398	410	599.8607	1197.7069	1197.7081	-1.04	0	70		6.1e-05	1		R.LAVQLVAGGSGVK.N
	398	410	599.8607	1197.7069	1197.7081	-1.04	0	74		2.4e-05	1		R.LAVQLVAGGSGVK.N
	398	410	599.8608	1197.7070	1197.7081	-0.94	0	77		1.2e-05	1		R.LAVQLVAGGSGVK.N
	398	410	599.8608	1197.7071	1197.7081	-0.84	0	70		5.3e-05	1		R.LAVQLVAGGSGVK.N
	398	410	599.8608	1197.7071	1197.7081	-0.84	0	66		0.00014	1		R.LAVQLVAGGSGVK.N
	398	410	599.8608	1197.7071	1197.7081	-0.84	0	69		6.7e-05	1		R.LAVQLVAGGSGVK.N
	398	410	599.8608	1197.7071	1197.7081	-0.84	0	80		5.8e-06	1		R.LAVQLVAGGSGVK.N
	398	410	599.8611	1197.7076	1197.7081	-0.44	0	75		1.7e-05	1		R.LAVQLVAGGSGVK.N
	398	410	599.8611	1197.7076	1197.7081	-0.44	0	72		3.5e-05	1		R.LAVQLVAGGSGVK.N
	398	410	599.8611	1197.7077	1197.7081	-0.32	0	73		2.9e-05	1		R.LAVQLVAGGSGVK.N
	398	410	599.8613	1197.7080	1197.7081	-0.12	0	73		2.7e-05	1		R.LAVQLVAGGSGVK.N
	398	410	599.8613	1197.7081	1197.7081	-0.018	0	74		2.4e-05	1		R.LAVQLVAGGSGVK.N
	398	410	599.8615	1197.7085	1197.7081	0.28	0	68		8.2e-05	1		R.LAVQLVAGGSGVK.N
	398	410	599.8616	1197.7086	1197.7081	0.38	0	70		5.7e-05	1		R.LAVQLVAGGSGVK.N
	398	410	599.8619	1197.7092	1197.7081	0.90	0	75		1.8e-05	1		R.LAVQLVAGGSGVK.N
	398	410	599.8619	1197.7092	1197.7081	0.90	0	76		1.3e-05	1		R.LAVQLVAGGSGVK.N
	421	428	453.7101	905.4057	905.4090	-3.66	0	55		0.0027	1	U	R.ATDDLDTR.L
	421	428	453.7102	905.4058	905.4090	-3.59	0	55		0.0027	1	U	R.ATDDLDTR.L
	421	428	453.7103	905.4060	905.4090	-3.31	0	55		0.0027	1	U	R.ATDDLDTR.L
	421	428	453.7104	905.4062	905.4090	-3.11	0	55		0.0027	1	U	R.ATDDLDTR.L
	421	428	453.7105	905.4065	905.4090	-2.78	0	55		0.0027	1	U	R.ATDDLDTR.L
	421	428	453.7106	905.4066	905.4090	-2.71	0	59		0.00088	1	U	R.ATDDLDTR.L
	421	428	453.7107	905.4069	905.4090	-2.38	0	55		0.0029	1	U	R.ATDDLDTR.L
	421	428	453.7109	905.4073	905.4090	-1.89	0	55		0.0028	1	U	R.ATDDLDTR.L
	421	428	453.7110	905.4074	905.4090	-1.76	0	60		0.00091	1	U	R.ATDDLDTR.L
	421	428	453.7111	905.4076	905.4090	-1.63	0	55		0.0028	1	U	R.ATDDLDTR.L
	421	428	453.7111	905.4077	905.4090	-1.43	0	60		0.00095	1	U	R.ATDDLDTR.L
	421	428	453.7113	905.4080	905.4090	-1.10	0	54		0.0034	1	U	R.ATDDLDTR.L
	421	428	453.7113	905.4081	905.4090	-1.03	0	59		0.001	1	U	R.ATDDLDTR.L
	421	428	453.7114	905.4082	905.4090	-0.97	0	44		0.034	1	U	R.ATDDLDTR.L
	421	428	453.7117	905.4088	905.4090	-0.28	0	45		0.027	1	U	R.ATDDLDTR.L
	421	428	453.7117	905.4088	905.4090	-0.28	0	53		0.0044	1	U	R.ATDDLDTR.L
	421	428	453.7117	905.4088	905.4090	-0.21	0	53		0.0042	1	U	R.ATDDLDTR.L
	421	428	453.7117	905.4088	905.4090	-0.21	0	45		0.027	1	U	R.ATDDLDTR.L
	421	428	453.7120	905.4094	905.4090	0.40	0	47		0.019	1	U	R.ATDDLDTR.L
	421	428	453.7120	905.4095	905.4090	0.54	0	54		0.0038	1	U	R.ATDDLDTR.L
	421	428	453.7121	905.4096	905.4090	0.67	0	64		0.00032	1	U	R.ATDDLDTR.L
	421	428	453.7132	905.4118	905.4090	3.03	0	59		0.0011	1	U	R.ATDDLDTR.L
	437	457	760.0687	2277.1844	2277.1893	-2.15	0	43		0.043	1	U	K.GIIEPISDVYVNLVNADFTAK.Q
	437	457	1139.6013	2277.1881	2277.1893	-0.51	0	65		0.00022	1	U	K.GIIEPISDVYVNLVNADFTAK.Q
	437	457	760.0702	2277.1889	2277.1893	-0.15	0	64		0.00032	1	U	K.GIIEPISDVYVNLVNADFTAK.Q
	437	457	1139.6019	2277.1893	2277.1893	0.023	0	76		1.7e-05	1	U	K.GIIEPISDVYVNLVNADFTAK.Q
	437	457	1139.6023	2277.1900	2277.1893	0.34	0	103		3.9e-08	1	U	K.GIIEPISDVYVNLVNADFTAK.Q
	492	503	620.8038	1239.5931	1239.5983	-4.17	0	84		3.5e-06	1	U	K.FASSLSESGEVK.V
	492	503	620.8039	1239.5932	1239.5983	-4.08	0	82		6.4e-06	1	U	K.FASSLSESGEVK.V
	492	503	620.8039	1239.5932	1239.5983	-4.08	0	74		3.9e-05	1	U	K.FASSLSESGEVK.V
	492	503	620.8039	1239.5932	1239.5983	-4.08	0	83		4.4e-06	1	U	K.FASSLSESGEVK.V
	492	503	620.8042	1239.5938	1239.5983	-3.58	0	85		3.4e-06	1	U	K.FASSLSESGEVK.V
	492	503	620.8043	1239.5940	1239.5983	-3.48	0	72		6.9e-05	1	U	K.FASSLSESGEVK.V
	492	503	620.8044	1239.5943	1239.5983	-3.19	0	84		4.1e-06	1	U	K.FASSLSESGEVK.V
	492	503	620.8045	1239.5944	1239.5983	-3.09	0	83		5.3e-06	1	U	K.FASSLSESGEVK.V
	492	503	620.8046	1239.5946	1239.5983	-2.98	0	83		5.3e-06	1	U	K.FASSLSESGEVK.V
	492	503	620.8046	1239.5947	1239.5983	-2.88	0	78		1.5e-05	1	U	K.FASSLSESGEVK.V
	492	503	620.8046	1239.5947	1239.5983	-2.88	0	78		1.7e-05	1	U	K.FASSLSESGEVK.V
	492	503	620.8047	1239.5948	1239.5983	-2.79	0	85		2.8e-06	1	U	K.FASSLSESGEVK.V
	492	503	620.8048	1239.5949	1239.5983	-2.69	0	77		2.1e-05	1	U	K.FASSLSESGEVK.V
	492	503	620.8048	1239.5949	1239.5983	-2.69	0	82		6.7e-06	1	U	K.FASSLSESGEVK.V
	492	503	620.8048	1239.5949	1239.5983	-2.69	0	69		0.00011	1	U	K.FASSLSESGEVK.V
	492	503	620.8048	1239.5951	1239.5983	-2.59	0	85		2.9e-06	1	U	K.FASSLSESGEVK.V
	492	503	620.8048	1239.5951	1239.5983	-2.59	0	75		2.8e-05	1	U	K.FASSLSESGEVK.V
	492	503	620.8048	1239.5951	1239.5983	-2.59	0	85		2.9e-06	1	U	K.FASSLSESGEVK.V
	492	503	620.8048	1239.5951	1239.5983	-2.59	0	80		1e-05	1	U	K.FASSLSESGEVK.V
	492	503	620.8048	1239.5951	1239.5983	-2.59	0	77		2e-05	1	U	K.FASSLSESGEVK.V
	492	503	620.8049	1239.5952	1239.5983	-2.50	0	83		5.3e-06	1	U	K.FASSLSESGEVK.V
	492	503	620.8049	1239.5952	1239.5983	-2.50	0	73		4.6e-05	1	U	K.FASSLSESGEVK.V
	492	503	620.8049	1239.5952	1239.5983	-2.50	0	72		6.2e-05	1	U	K.FASSLSESGEVK.V
	492	503	620.8049	1239.5953	1239.5983	-2.40	0	76		2.4e-05	1	U	K.FASSLSESGEVK.V
	492	503	620.8051	1239.5955	1239.5983	-2.21	0	80		9.7e-06	1	U	K.FASSLSESGEVK.V
	492	503	620.8051	1239.5955	1239.5983	-2.21	0	77		2e-05	1	U	K.FASSLSESGEVK.V
	492	503	620.8051	1239.5955	1239.5983	-2.21	0	72		5.5e-05	1	U	K.FASSLSESGEVK.V
	492	503	620.8051	1239.5957	1239.5983	-2.11	0	77		1.9e-05	1	U	K.FASSLSESGEVK.V
	492	503	620.8051	1239.5957	1239.5983	-2.11	0	79		1.3e-05	1	U	K.FASSLSESGEVK.V
	492	503	620.8052	1239.5958	1239.5983	-2.00	0	76		2.4e-05	1	U	K.FASSLSESGEVK.V
	492	503	620.8052	1239.5958	1239.5983	-2.00	0	83		5.4e-06	1	U	K.FASSLSESGEVK.V
	492	503	620.8052	1239.5958	1239.5983	-2.00	0	86		2.7e-06	1	U	K.FASSLSESGEVK.V
	492	503	620.8052	1239.5958	1239.5983	-2.00	0	85		2.8e-06	1	U	K.FASSLSESGEVK.V
	492	503	620.8052	1239.5959	1239.5983	-1.90	0	85		2.9e-06	1	U	K.FASSLSESGEVK.V
	492	503	620.8053	1239.5960	1239.5983	-1.80	0	73		4.8e-05	1	U	K.FASSLSESGEVK.V
	492	503	620.8054	1239.5962	1239.5983	-1.71	0	85		2.9e-06	1	U	K.FASSLSESGEVK.V
	492	503	620.8054	1239.5962	1239.5983	-1.71	0	75		2.9e-05	1	U	K.FASSLSESGEVK.V
	492	503	620.8054	1239.5963	1239.5983	-1.61	0	76		2.5e-05	1	U	K.FASSLSESGEVK.V
	492	503	620.8055	1239.5964	1239.5983	-1.51	0	74		4.2e-05	1	U	K.FASSLSESGEVK.V
	492	503	620.8055	1239.5964	1239.5983	-1.51	0	85		3e-06	1	U	K.FASSLSESGEVK.V
	492	503	620.8055	1239.5965	1239.5983	-1.41	0	74		4.1e-05	1	U	K.FASSLSESGEVK.V
	492	503	620.8055	1239.5965	1239.5983	-1.41	0	77		1.8e-05	1	U	K.FASSLSESGEVK.V
	492	503	620.8056	1239.5966	1239.5983	-1.32	0	72		6.5e-05	1	U	K.FASSLSESGEVK.V
	492	503	620.8056	1239.5966	1239.5983	-1.32	0	80		1e-05	1	U	K.FASSLSESGEVK.V
	492	503	620.8056	1239.5966	1239.5983	-1.32	0	77		1.8e-05	1	U	K.FASSLSESGEVK.V
	492	503	620.8056	1239.5966	1239.5983	-1.32	0	83		5.5e-06	1	U	K.FASSLSESGEVK.V
	492	503	620.8057	1239.5969	1239.5983	-1.11	0	84		3.7e-06	1	U	K.FASSLSESGEVK.V
	492	503	620.8057	1239.5969	1239.5983	-1.11	0	78		1.5e-05	1	U	K.FASSLSESGEVK.V
	492	503	620.8058	1239.5970	1239.5983	-1.01	0	46		0.027	1	U	K.FASSLSESGEVK.V
	492	503	620.8058	1239.5970	1239.5983	-1.01	0	72		5.7e-05	1	U	K.FASSLSESGEVK.V
	492	503	620.8058	1239.5971	1239.5983	-0.91	0	75		3.5e-05	1	U	K.FASSLSESGEVK.V
	492	503	620.8059	1239.5973	1239.5983	-0.82	0	69		0.00013	1	U	K.FASSLSESGEVK.V
	492	503	620.8060	1239.5974	1239.5983	-0.72	0	70		0.00011	1	U	K.FASSLSESGEVK.V
	492	503	620.8060	1239.5974	1239.5983	-0.72	0	71		7.3e-05	1	U	K.FASSLSESGEVK.V
	492	503	620.8060	1239.5975	1239.5983	-0.62	0	77		2.1e-05	1	U	K.FASSLSESGEVK.V
	492	503	620.8060	1239.5975	1239.5983	-0.62	0	73		5.5e-05	1	U	K.FASSLSESGEVK.V
	492	503	620.8060	1239.5975	1239.5983	-0.62	0	77		1.8e-05	1	U	K.FASSLSESGEVK.V
	492	503	620.8062	1239.5977	1239.5983	-0.43	0	72		6.2e-05	1	U	K.FASSLSESGEVK.V
	492	503	620.8063	1239.5980	1239.5983	-0.24	0	70		0.00011	1	U	K.FASSLSESGEVK.V
	492	503	620.8063	1239.5981	1239.5983	-0.12	0	71		7.4e-05	1	U	K.FASSLSESGEVK.V
	492	503	620.8066	1239.5986	1239.5983	0.26	0	82		6.7e-06	1	U	K.FASSLSESGEVK.V
	492	503	620.8068	1239.5990	1239.5983	0.55	0	77		1.8e-05	1	U	K.FASSLSESGEVK.V
	492	503	620.8068	1239.5990	1239.5983	0.55	0	73		4.9e-05	1	U	K.FASSLSESGEVK.V
	492	503	620.8068	1239.5991	1239.5983	0.65	0	72		6.9e-05	1	U	K.FASSLSESGEVK.V
	492	503	620.8070	1239.5993	1239.5983	0.86	0	69		0.00013	1	U	K.FASSLSESGEVK.V
	492	503	620.8071	1239.5997	1239.5983	1.15	0	76		2.3e-05	1	U	K.FASSLSESGEVK.V
	508	517	365.2162	1092.6267	1092.6291	-2.20	1	50		0.0063	1		K.VKDGVPHLTK.V
	508	517	365.2164	1092.6273	1092.6291	-1.71	1	50		0.0067	1		K.VKDGVPHLTK.V
	508	517	365.2164	1092.6273	1092.6291	-1.71	1	59		0.00068	1		K.VKDGVPHLTK.V
	508	517	365.2164	1092.6274	1092.6291	-1.63	1	49		0.0073	1		K.VKDGVPHLTK.V
	510	517	433.7391	865.4637	865.4658	-2.43	0	53		0.0057	1		K.DGVPHLTK.V
	510	517	433.7395	865.4644	865.4658	-1.60	0	53		0.005	1		K.DGVPHLTK.V
	536	564	1013.1595	3036.4566	3036.4645	-2.60	0	96		1.5e-07	1	U	R.QVDQPGMIGTVGSILGESNVNVNFMSVGR.I + 2 Oxidation (M)
	536	564	1013.1597	3036.4572	3036.4645	-2.41	0	84		2.3e-06	1	U	R.QVDQPGMIGTVGSILGESNVNVNFMSVGR.I + 2 Oxidation (M)
	536	564	1013.1601	3036.4585	3036.4645	-1.99	0	95		2.2e-07	1	U	R.QVDQPGMIGTVGSILGESNVNVNFMSVGR.I + 2 Oxidation (M)
	536	564	1013.1605	3036.4596	3036.4645	-1.63	0	109		7.7e-09	1	U	R.QVDQPGMIGTVGSILGESNVNVNFMSVGR.I + 2 Oxidation (M)
	536	564	1013.1608	3036.4605	3036.4645	-1.33	0	117		1.3e-09	1	U	R.QVDQPGMIGTVGSILGESNVNVNFMSVGR.I + 2 Oxidation (M)
	536	564	1013.1609	3036.4608	3036.4645	-1.21	0	90		6.3e-07	1	U	R.QVDQPGMIGTVGSILGESNVNVNFMSVGR.I + 2 Oxidation (M)
	536	564	1013.1624	3036.4654	3036.4645	0.29	0	106		1.8e-08	1	U	R.QVDQPGMIGTVGSILGESNVNVNFMSVGR.I + 2 Oxidation (M)
	584	588	309.6947	617.3749	617.3748	0.17	1	44		0.041	1		K.ETLKK.I
	584	588	309.6947	617.3749	617.3748	0.17	1	44		0.04	1		K.ETLKK.I
	584	588	309.6948	617.3750	617.3748	0.27	1	44		0.041	1		K.ETLKK.I
	584	588	309.6948	617.3750	617.3748	0.27	1	44		0.041	1		K.ETLKK.I
	584	588	309.6948	617.3750	617.3748	0.37	1	44		0.041	1		K.ETLKK.I
	584	588	309.6948	617.3751	617.3748	0.46	1	44		0.04	1		K.ETLKK.I
	584	588	309.6948	617.3751	617.3748	0.56	1	44		0.041	1		K.ETLKK.I
	584	588	309.6950	617.3753	617.3748	0.88	1	44		0.041	1		K.ETLKK.I
	584	588	309.6950	617.3755	617.3748	1.08	1	44		0.041	1		K.ETLKK.I
10	81	91	553.2892	1104.5638	1104.5663	-2.23	0	80	41	1.7e-05	1	U	K.SVGDLTSADLK.G	17
	81	91	553.2892	1104.5638	1104.5663	-2.23	0	80		1.7e-05	1	U	K.SVGDLTSADLK.G
	81	91	553.2893	1104.5639	1104.5663	-2.10	0	60		0.0016	1	U	K.SVGDLTSADLK.G
	99	116	1008.4754	2014.9362	2014.9444	-4.02	0	96		1.9e-07	1	U	R.ADLNVPLDDNQTITDDTR.I
	99	116	1008.4761	2014.9376	2014.9444	-3.36	0	107		1.9e-08	1	U	R.ADLNVPLDDNQTITDDTR.I
	99	116	1008.4768	2014.9389	2014.9444	-2.68	0	101		7e-08	1	U	R.ADLNVPLDDNQTITDDTR.I
	99	116	1008.4768	2014.9391	2014.9444	-2.62	0	96		2.2e-07	1	U	R.ADLNVPLDDNQTITDDTR.I
	99	116	1008.4770	2014.9394	2014.9444	-2.44	0	94		3.5e-07	1	U	R.ADLNVPLDDNQTITDDTR.I
	99	116	672.6539	2014.9398	2014.9444	-2.27	0	66		0.00022	1	U	R.ADLNVPLDDNQTITDDTR.I
	99	116	1008.4774	2014.9402	2014.9444	-2.08	0	96		2.4e-07	1	U	R.ADLNVPLDDNQTITDDTR.I
	99	116	1008.4785	2014.9425	2014.9444	-0.92	0	96		2.2e-07	1	U	R.ADLNVPLDDNQTITDDTR.I
	99	116	1008.4788	2014.9430	2014.9444	-0.69	0	68		0.00015	1	U	R.ADLNVPLDDNQTITDDTR.I
	99	116	1008.4790	2014.9434	2014.9444	-0.45	0	70		9.7e-05	1	U	R.ADLNVPLDDNQTITDDTR.I
	99	116	1008.4799	2014.9453	2014.9444	0.47	0	81		7.5e-06	1	U	R.ADLNVPLDDNQTITDDTR.I
	119	125	357.2303	712.4461	712.4483	-3.02	0	48		0.0083	1		R.AAIPTIK.Y
	119	125	357.2305	712.4465	712.4483	-2.52	0	48		0.0074	1		R.AAIPTIK.Y
	119	125	357.2306	712.4466	712.4483	-2.44	0	47		0.01	1		R.AAIPTIK.Y
	126	133	454.2465	906.4784	906.4810	-2.96	0	45		0.049	1	U	K.YLIENGAK.V
	150	158	500.3017	998.5889	998.5913	-2.39	0	49		0.012	1		K.FSLAPLVPR.L
	150	158	500.3017	998.5889	998.5913	-2.39	0	49		0.012	1		K.FSLAPLVPR.L
	150	158	500.3021	998.5897	998.5913	-1.61	0	50		0.0089	1		K.FSLAPLVPR.L
	205	211	410.6949	819.3753	819.3763	-1.19	0	44		0.037	1		K.NDPEFAK.K
	213	230	645.3298	1932.9677	1932.9694	-0.88	0	57		0.0023	1		K.LASLADLYVNDAFGTAHR.A
	213	230	645.3351	1932.9834	1932.9694	7.27	0	56		0.0029	1		K.LASLADLYVNDAFGTAHR.A
	213	230	645.3384	1932.9935	1932.9694	12.5	0	79		1.2e-05	1		K.LASLADLYVNDAFGTAHR.A
	231	240	334.1728	999.4966	999.4985	-1.89	0	47		0.016	1		R.AHASTEGVTK.F
	231	240	334.1728	999.4967	999.4985	-1.80	0	43		0.05	1		R.AHASTEGVTK.F
	231	240	500.7557	999.4967	999.4985	-1.77	0	59		0.0012	1		R.AHASTEGVTK.F
	231	240	500.7557	999.4967	999.4985	-1.77	0	69		0.00011	1		R.AHASTEGVTK.F
	231	240	500.7559	999.4973	999.4985	-1.23	0	59		0.0011	1		R.AHASTEGVTK.F
	231	240	500.7561	999.4976	999.4985	-0.87	0	60		0.00094	1		R.AHASTEGVTK.F
	231	240	334.1732	999.4979	999.4985	-0.60	0	50		0.0095	1		R.AHASTEGVTK.F
	241	253	724.4355	1446.8564	1446.8599	-2.37	0	51		0.0024	1		K.FLKPSVAGFLLQK.E
	241	253	483.2929	1446.8569	1446.8599	-2.05	0	69		3.8e-05	1		K.FLKPSVAGFLLQK.E
	241	253	724.4357	1446.8569	1446.8599	-2.04	0	52		0.0019	1		K.FLKPSVAGFLLQK.E
	267	277	551.8204	1101.6263	1101.6295	-2.87	0	57		0.002	2		K.RPFAAIVGGSK.V
	267	277	551.8207	1101.6269	1101.6295	-2.31	0	58		0.0018	1		K.RPFAAIVGGSK.V
	267	277	551.8208	1101.6270	1101.6295	-2.20	0	56		0.0028	1		K.RPFAAIVGGSK.V
	267	277	551.8209	1101.6273	1101.6295	-1.98	0	54		0.0041	1		K.RPFAAIVGGSK.V
	282	291	550.8307	1099.6468	1099.6488	-1.84	0	55		0.0026	1		K.IGVIESLLEK.C
	282	291	550.8309	1099.6473	1099.6488	-1.40	0	63		0.00039	1		K.IGVIESLLEK.C
	337	351	763.4440	1524.8734	1524.8763	-1.93	0	62		0.00029	1	U	K.GVSLLLPTDVVVADK.F
	337	351	763.4443	1524.8740	1524.8763	-1.53	0	47		0.0095	1	U	K.GVSLLLPTDVVVADK.F
	352	359	425.2078	848.4011	848.4028	-2.04	0	45		0.041	1		K.FAPDANSK.I
	352	359	425.2079	848.4012	848.4028	-1.87	0	44		0.045	1		K.FAPDANSK.I
	407	417	546.7867	1091.5589	1091.5611	-1.99	0	62		0.001	1	U	K.FAAGTEAIANK.L
	407	417	546.7869	1091.5592	1091.5611	-1.75	0	72		9.1e-05	1	U	K.FAAGTEAIANK.L
	418	424	395.2203	788.4261	788.4279	-2.38	0	58		0.003	1	U	K.LAELSEK.G
	418	424	395.2204	788.4262	788.4279	-2.16	0	58		0.0029	1	U	K.LAELSEK.G
	425	441	787.4241	1572.8337	1572.8359	-1.41	0	73		5.5e-05	1		K.GVTTIIGGGDSVAAVEK.V
	425	441	787.4243	1572.8341	1572.8359	-1.17	0	76		3e-05	1		K.GVTTIIGGGDSVAAVEK.V
	425	441	787.4260	1572.8374	1572.8359	0.92	0	76		3.1e-05	1		K.GVTTIIGGGDSVAAVEK.V
	442	465	762.4105	2284.2097	2284.1733	15.9	0	78		1.1e-05	1	U	K.VGVAGVMSHISTGGGASLELLEGK.V + Oxidation (M)
11	110	118	502.7928	1003.5710	1003.5736	-2.57	0	52	41	0.0055	1	U	K.MLGQVLVTK.Q + Oxidation (M)	9
	110	118	502.7931	1003.5716	1003.5736	-2.03	0	54		0.0042	1	U	K.MLGQVLVTK.Q + Oxidation (M)
	197	204	399.7385	797.4625	797.4647	-2.76	0	46		0.017	1	U	K.VVDGLAPK.A
	209	216	473.7636	945.5125	945.5131	-0.58	1	51		0.018	1	U	R.KDSIEQVK.K
	250	259	591.7792	1181.5438	1181.5465	-2.32	0	60		0.001	1	U	K.LNFDDNAAFR.Q
	268	275	479.2165	956.4185	956.4199	-1.52	0	39		0.048	1	U	R.DPTQEDPR.E
	377	382	334.7257	667.4369	667.4381	-1.77	0	35		0.015	1	U	K.VPVVVR.L
	383	392	537.7736	1073.5326	1073.5353	-2.54	0	57		0.0026	1	U	R.LEGTNVEQGK.R
	383	393	615.8247	1229.6349	1229.6364	-1.24	1	62		0.00094	1	U	R.LEGTNVEQGKR.I
	402	414	695.3396	1388.6646	1388.6671	-1.75	0	84		4.2e-06	1	U	K.LITADDLDDAAEK.A
	402	414	695.3401	1388.6657	1388.6671	-0.96	0	84		4.1e-06	1	U	K.LITADDLDDAAEK.A
12	30	38	485.7864	969.5582	969.5607	-2.60	0	53	42	0.0034	1		R.VTTLPNGLR.V	13
	30	38	485.7864	969.5583	969.5607	-2.48	0	53		0.004	1		R.VTTLPNGLR.V
	30	38	485.7866	969.5586	969.5607	-2.23	0	53		0.004	1		R.VTTLPNGLR.V
	39	48	510.2709	1018.5272	1018.5295	-2.24	0	69		0.00027	1	U	R.VATESNLSAK.T
	39	48	510.2709	1018.5272	1018.5295	-2.18	0	69		0.00027	1	U	R.VATESNLSAK.T
	39	48	510.2711	1018.5276	1018.5295	-1.86	0	64		0.00083	1	U	R.VATESNLSAK.T
	39	48	510.2711	1018.5276	1018.5295	-1.86	0	64		0.00083	1	U	R.VATESNLSAK.T
	181	190	520.8071	1039.5996	1039.6026	-2.88	0	42		0.035	1	U	R.TILGPAQNVK.S
	181	190	520.8072	1039.5999	1039.6026	-2.54	0	42		0.035	1	U	R.TILGPAQNVK.S
	181	190	520.8075	1039.6004	1039.6026	-2.06	0	42		0.035	1	U	R.TILGPAQNVK.S
	210	219	473.7725	945.5305	945.5317	-1.31	0	55		0.0048	1	U	R.MVIAAAGAVK.H + Oxidation (M)
	210	219	473.7725	945.5305	945.5317	-1.31	0	58		0.0021	1	U	R.MVIAAAGAVK.H + Oxidation (M)
	220	228	548.7836	1095.5527	1095.5560	-3.03	0	55		0.0038	1	U	K.HEEVVEQVK.K
	220	228	548.7842	1095.5538	1095.5560	-2.03	0	50		0.013	1	U	K.HEEVVEQVK.K
	220	229	408.8905	1223.6497	1223.6510	-1.07	1	46		0.024	1	U	K.HEEVVEQVKK.L
	332	343	620.8317	1239.6489	1239.6499	-0.84	0	46		0.024	1		K.DTGLFGVYAVAK.A
	332	343	620.8321	1239.6496	1239.6499	-0.26	0	47		0.023	1		K.DTGLFGVYAVAK.A
	332	343	620.8324	1239.6502	1239.6499	0.24	0	45		0.035	1		K.DTGLFGVYAVAK.A
	379	397	1014.5060	2026.9975	2026.9993	-0.90	0	100		1.1e-07	1	U	K.SSLLLHMDGTSPIAEDIGR.Q + Oxidation (M)
	405	414	587.3395	1172.6644	1172.6666	-1.84	1	47		0.024	1		R.RIPTAELFAR.I
	405	414	587.3395	1172.6644	1172.6666	-1.84	1	48		0.017	1		R.RIPTAELFAR.I
	405	414	587.3397	1172.6648	1172.6666	-1.53	1	46		0.03	1		R.RIPTAELFAR.I
	405	414	587.3398	1172.6650	1172.6666	-1.33	1	46		0.028	1		R.RIPTAELFAR.I
	405	414	587.3398	1172.6651	1172.6666	-1.23	1	47		0.023	1		R.RIPTAELFAR.I
	405	414	587.3400	1172.6654	1172.6666	-1.00	1	45		0.032	1		R.RIPTAELFAR.I
	405	414	587.3401	1172.6657	1172.6666	-0.70	1	47		0.02	1		R.RIPTAELFAR.I
	405	414	587.3402	1172.6659	1172.6666	-0.59	1	48		0.016	1		R.RIPTAELFAR.I
	405	414	587.3403	1172.6661	1172.6666	-0.39	1	46		0.029	1		R.RIPTAELFAR.I
	405	414	587.3405	1172.6663	1172.6666	-0.19	1	48		0.019	1		R.RIPTAELFAR.I
	405	414	587.3406	1172.6666	1172.6666	0.037	1	47		0.02	1		R.RIPTAELFAR.I
	415	424	509.7731	1017.5316	1017.5342	-2.55	0	74		7e-05	1		R.IDAVDASTVK.R
	415	424	509.7734	1017.5322	1017.5342	-2.00	0	65		0.00052	1		R.IDAVDASTVK.R
	415	424	509.7737	1017.5329	1017.5342	-1.35	0	63		0.00087	1		R.IDAVDASTVK.R
	415	424	509.7737	1017.5329	1017.5342	-1.29	0	62		0.00096	1		R.IDAVDASTVK.R
	415	424	509.7738	1017.5330	1017.5342	-1.23	0	65		0.00052	1		R.IDAVDASTVK.R
	415	425	392.2182	1173.6327	1173.6353	-2.27	1	57		0.0031	1		R.IDAVDASTVKR.V
	415	425	587.8239	1173.6333	1173.6353	-1.77	1	77		2.6e-05	1		R.IDAVDASTVKR.V
	415	425	587.8243	1173.6341	1173.6353	-1.04	1	61		0.0011	1		R.IDAVDASTVKR.V
	430	452	875.7878	2624.3415	2624.3373	1.59	1	44		0.031	1	U	K.YIYDKDIAISAIGPIQDLPDYNK.F
	430	452	875.7895	2624.3468	2624.3373	3.61	1	55		0.0027	1	U	K.YIYDKDIAISAIGPIQDLPDYNK.F
	435	452	972.0090	1942.0034	1942.0047	-0.69	0	61		0.00085	1	U	K.DIAISAIGPIQDLPDYNK.F
	435	452	972.0090	1942.0034	1942.0047	-0.69	0	51		0.0083	1	U	K.DIAISAIGPIQDLPDYNK.F
13	7	17	625.8220	1249.6294	1249.6302	-0.69	0	73	43	9e-05	1	U	R.AAELTNLFESR.I	13
	7	17	625.8220	1249.6294	1249.6302	-0.69	0	67		0.00034	1	U	R.AAELTNLFESR.I
	7	17	625.8220	1249.6295	1249.6302	-0.60	0	67		0.00034	1	U	R.AAELTNLFESR.I
	7	17	625.8220	1249.6295	1249.6302	-0.60	0	67		0.00033	1	U	R.AAELTNLFESR.I
	7	17	625.8220	1249.6295	1249.6302	-0.60	0	67		0.00034	1	U	R.AAELTNLFESR.I
	7	17	625.8221	1249.6296	1249.6302	-0.50	0	67		0.00033	1	U	R.AAELTNLFESR.I
	7	17	625.8221	1249.6297	1249.6302	-0.40	0	72		9.4e-05	1	U	R.AAELTNLFESR.I
	7	17	625.8222	1249.6298	1249.6302	-0.31	0	67		0.00034	1	U	R.AAELTNLFESR.I
	7	17	625.8222	1249.6298	1249.6302	-0.31	0	67		0.00034	1	U	R.AAELTNLFESR.I
	7	17	625.8222	1249.6298	1249.6302	-0.31	0	73		8.8e-05	1	U	R.AAELTNLFESR.I
	7	17	625.8223	1249.6301	1249.6302	-0.10	0	73		8.7e-05	1	U	R.AAELTNLFESR.I
	7	17	625.8225	1249.6305	1249.6302	0.19	0	72		9.1e-05	1	U	R.AAELTNLFESR.I
	7	17	625.8226	1249.6307	1249.6302	0.38	0	73		8.8e-05	1	U	R.AAELTNLFESR.I
	7	17	625.8228	1249.6309	1249.6302	0.57	0	67		0.00032	1	U	R.AAELTNLFESR.I
	7	17	625.8229	1249.6312	1249.6302	0.78	0	67		0.00035	1	U	R.AAELTNLFESR.I
	86	91	330.6808	659.3471	659.3490	-2.90	0	56		0.006	1		K.EGDLVK.R
	86	91	330.6810	659.3474	659.3490	-2.44	0	56		0.0061	1		K.EGDLVK.R
	86	91	330.6810	659.3475	659.3490	-2.26	0	56		0.006	1		K.EGDLVK.R
	86	91	330.6811	659.3476	659.3490	-2.08	0	56		0.0059	1		K.EGDLVK.R
	86	91	330.6811	659.3476	659.3490	-2.08	0	56		0.006	1		K.EGDLVK.R
	86	91	330.6811	659.3477	659.3490	-1.99	0	56		0.006	1		K.EGDLVK.R
	86	91	330.6812	659.3479	659.3490	-1.72	0	56		0.0059	1		K.EGDLVK.R
	93	103	522.2886	1042.5627	1042.5659	-3.03	0	75		4.6e-05	1		R.TGSIVDVPAGK.A
	93	103	522.2887	1042.5628	1042.5659	-2.91	0	75		4.6e-05	1		R.TGSIVDVPAGK.A
	93	103	522.2888	1042.5630	1042.5659	-2.80	0	58		0.0024	1		R.TGSIVDVPAGK.A
	93	103	522.2889	1042.5633	1042.5659	-2.45	0	55		0.0044	1		R.TGSIVDVPAGK.A
	93	103	522.2891	1042.5637	1042.5659	-2.11	0	75		4.6e-05	1		R.TGSIVDVPAGK.A
	93	103	522.2891	1042.5637	1042.5659	-2.11	0	75		4.6e-05	1		R.TGSIVDVPAGK.A
	93	103	522.2893	1042.5639	1042.5659	-1.86	0	75		4.6e-05	1		R.TGSIVDVPAGK.A
	93	103	522.2893	1042.5641	1042.5659	-1.74	0	75		4.6e-05	1		R.TGSIVDVPAGK.A
	109	120	622.8172	1243.6198	1243.6231	-2.61	0	71		0.00011	1	U	R.VVDAMGVPIDGR.G + Oxidation (M)
	109	120	622.8172	1243.6198	1243.6231	-2.61	0	69		0.00017	1	U	R.VVDAMGVPIDGR.G + Oxidation (M)
	109	120	622.8172	1243.6198	1243.6231	-2.61	0	49		0.017	1	U	R.VVDAMGVPIDGR.G + Oxidation (M)
	109	120	622.8175	1243.6204	1243.6231	-2.13	0	75		4.3e-05	1	U	R.VVDAMGVPIDGR.G + Oxidation (M)
	109	120	622.8175	1243.6204	1243.6231	-2.13	0	57		0.0025	1	U	R.VVDAMGVPIDGR.G + Oxidation (M)
	109	120	622.8176	1243.6207	1243.6231	-1.92	0	66		0.00031	1	U	R.VVDAMGVPIDGR.G + Oxidation (M)
	109	120	622.8179	1243.6213	1243.6231	-1.44	0	73		6.2e-05	1	U	R.VVDAMGVPIDGR.G + Oxidation (M)
	109	120	622.8179	1243.6213	1243.6231	-1.44	0	61		0.0011	1	U	R.VVDAMGVPIDGR.G + Oxidation (M)
	109	120	622.8180	1243.6215	1243.6231	-1.24	0	66		0.00034	1	U	R.VVDAMGVPIDGR.G + Oxidation (M)
	109	120	622.8185	1243.6225	1243.6231	-0.45	0	71		9.6e-05	1	U	R.VVDAMGVPIDGR.G + Oxidation (M)
	121	129	506.7420	1011.4694	1011.4734	-3.87	0	65		0.00026	1		R.GALSDHEQR.R
	121	129	506.7420	1011.4695	1011.4734	-3.81	0	51		0.0065	1		R.GALSDHEQR.R
	121	129	506.7426	1011.4706	1011.4734	-2.72	0	71		6.3e-05	1		R.GALSDHEQR.R
	121	129	506.7429	1011.4712	1011.4734	-2.17	0	45		0.024	1		R.GALSDHEQR.R
	121	129	506.7431	1011.4716	1011.4734	-1.69	0	71		6.8e-05	1		R.GALSDHEQR.R
	121	129	506.7432	1011.4718	1011.4734	-1.51	0	71		6.2e-05	1		R.GALSDHEQR.R
	121	129	506.7433	1011.4720	1011.4734	-1.31	0	71		5.9e-05	1		R.GALSDHEQR.R
	121	129	506.7435	1011.4724	1011.4734	-0.90	0	71		5.8e-05	1		R.GALSDHEQR.R
	121	129	506.7436	1011.4726	1011.4734	-0.78	0	50		0.007	1		R.GALSDHEQR.R
	135	141	378.2228	754.4311	754.4337	-3.43	0	44		0.026	1		K.APGILER.K
	135	141	378.2229	754.4313	754.4337	-3.19	0	44		0.026	1		K.APGILER.K
	135	141	378.2233	754.4320	754.4337	-2.21	0	49		0.0066	1		K.APGILER.K
	135	141	378.2234	754.4322	754.4337	-1.97	0	42		0.039	1		K.APGILER.K
	135	141	378.2236	754.4326	754.4337	-1.50	0	42		0.039	1		K.APGILER.K
	135	141	378.2239	754.4332	754.4337	-0.67	0	49		0.0067	1		K.APGILER.K
	154	163	513.8000	1025.5854	1025.5869	-1.48	0	54		0.0028	1		K.AVDSLVPIGR.G
	154	163	513.8001	1025.5855	1025.5869	-1.36	0	53		0.0032	1		K.AVDSLVPIGR.G
	154	163	513.8001	1025.5857	1025.5869	-1.25	0	46		0.019	1		K.AVDSLVPIGR.G
	154	163	513.8002	1025.5858	1025.5869	-1.13	0	56		0.0018	1		K.AVDSLVPIGR.G
	154	163	513.8002	1025.5859	1025.5869	-1.01	0	53		0.0037	1		K.AVDSLVPIGR.G
	154	163	513.8003	1025.5860	1025.5869	-0.89	0	51		0.0048	1		K.AVDSLVPIGR.G
	154	163	513.8003	1025.5861	1025.5869	-0.78	0	49		0.009	1		K.AVDSLVPIGR.G
	167	173	408.2333	814.4520	814.4548	-3.49	0	47		0.03	1		R.ELLIGDR.Q
	167	173	408.2335	814.4525	814.4548	-2.83	0	47		0.03	1		R.ELLIGDR.Q
	167	173	408.2337	814.4528	814.4548	-2.53	0	47		0.03	1		R.ELLIGDR.Q
	167	173	408.2338	814.4530	814.4548	-2.31	0	47		0.031	1		R.ELLIGDR.Q
	167	173	408.2338	814.4530	814.4548	-2.31	0	47		0.03	1		R.ELLIGDR.Q
	167	173	408.2338	814.4530	814.4548	-2.21	0	47		0.03	1		R.ELLIGDR.Q
	167	173	408.2338	814.4530	814.4548	-2.21	0	47		0.03	1		R.ELLIGDR.Q
	167	173	408.2338	814.4530	814.4548	-2.21	0	47		0.03	1		R.ELLIGDR.Q
	167	173	408.2339	814.4532	814.4548	-2.06	0	47		0.031	1		R.ELLIGDR.Q
	167	173	408.2340	814.4534	814.4548	-1.77	0	47		0.031	1		R.ELLIGDR.Q
	167	173	408.2340	814.4535	814.4548	-1.62	0	47		0.03	1		R.ELLIGDR.Q
	167	173	408.2341	814.4536	814.4548	-1.55	0	47		0.03	1		R.ELLIGDR.Q
	167	173	408.2342	814.4538	814.4548	-1.25	0	47		0.03	1		R.ELLIGDR.Q
	167	173	408.2344	814.4543	814.4548	-0.64	0	47		0.031	1		R.ELLIGDR.Q
	178	189	665.8803	1329.7459	1329.7504	-3.32	0	59		0.0011	1	U	K.TTIAIDTILNQK.Q
	178	189	665.8808	1329.7470	1329.7504	-2.50	0	56		0.0024	1	U	K.TTIAIDTILNQK.Q
	178	189	665.8809	1329.7472	1329.7504	-2.40	0	49		0.011	1	U	K.TTIAIDTILNQK.Q
	178	189	665.8813	1329.7480	1329.7504	-1.76	0	71		7.2e-05	1	U	K.TTIAIDTILNQK.Q
	178	189	665.8813	1329.7481	1329.7504	-1.67	0	66		0.00025	1	U	K.TTIAIDTILNQK.Q
	178	189	665.8814	1329.7483	1329.7504	-1.58	0	48		0.014	1	U	K.TTIAIDTILNQK.Q
	178	189	665.8814	1329.7483	1329.7504	-1.58	0	58		0.0014	1	U	K.TTIAIDTILNQK.Q
	178	189	665.8817	1329.7489	1329.7504	-1.13	0	65		0.00027	1	U	K.TTIAIDTILNQK.Q
	178	189	665.8817	1329.7489	1329.7504	-1.13	0	65		0.00026	1	U	K.TTIAIDTILNQK.Q
	178	189	665.8818	1329.7491	1329.7504	-0.93	0	79		1.1e-05	1	U	K.TTIAIDTILNQK.Q
	178	189	665.8818	1329.7491	1329.7504	-0.93	0	79		1.1e-05	1	U	K.TTIAIDTILNQK.Q
	178	189	665.8818	1329.7491	1329.7504	-0.93	0	58		0.0014	1	U	K.TTIAIDTILNQK.Q
	178	189	665.8818	1329.7491	1329.7504	-0.93	0	56		0.0026	1	U	K.TTIAIDTILNQK.Q
	178	189	665.8819	1329.7492	1329.7504	-0.84	0	79		1.1e-05	1	U	K.TTIAIDTILNQK.Q
	178	189	665.8819	1329.7492	1329.7504	-0.84	0	63		0.00044	1	U	K.TTIAIDTILNQK.Q
	178	189	665.8819	1329.7492	1329.7504	-0.84	0	53		0.0048	1	U	K.TTIAIDTILNQK.Q
	178	189	665.8820	1329.7495	1329.7504	-0.66	0	79		1.1e-05	1	U	K.TTIAIDTILNQK.Q
	178	189	665.8821	1329.7496	1329.7504	-0.57	0	79		1.2e-05	1	U	K.TTIAIDTILNQK.Q
	178	189	665.8821	1329.7497	1329.7504	-0.48	0	79		1.1e-05	1	U	K.TTIAIDTILNQK.Q
	178	189	665.8821	1329.7497	1329.7504	-0.48	0	79		1.1e-05	1	U	K.TTIAIDTILNQK.Q
	178	189	665.8821	1329.7497	1329.7504	-0.48	0	79		1.2e-05	1	U	K.TTIAIDTILNQK.Q
	178	189	665.8821	1329.7497	1329.7504	-0.48	0	44		0.035	1	U	K.TTIAIDTILNQK.Q
	178	189	665.8822	1329.7498	1329.7504	-0.39	0	79		1.2e-05	1	U	K.TTIAIDTILNQK.Q
	178	189	665.8823	1329.7501	1329.7504	-0.21	0	79		1.2e-05	1	U	K.TTIAIDTILNQK.Q
	178	189	665.8823	1329.7501	1329.7504	-0.21	0	74		3.8e-05	1	U	K.TTIAIDTILNQK.Q
	178	189	665.8823	1329.7501	1329.7504	-0.21	0	74		3.7e-05	1	U	K.TTIAIDTILNQK.Q
	178	189	665.8824	1329.7502	1329.7504	-0.10	0	58		0.0014	1	U	K.TTIAIDTILNQK.Q
	178	189	665.8824	1329.7503	1329.7504	-0.014	0	79		1.2e-05	1	U	K.TTIAIDTILNQK.Q
	178	189	665.8824	1329.7503	1329.7504	-0.014	0	79		1.2e-05	1	U	K.TTIAIDTILNQK.Q
	178	189	665.8824	1329.7503	1329.7504	-0.014	0	79		1e-05	1	U	K.TTIAIDTILNQK.Q
	178	189	665.8824	1329.7503	1329.7504	-0.014	0	61		0.0007	1	U	K.TTIAIDTILNQK.Q
	178	189	665.8825	1329.7505	1329.7504	0.077	0	79		1.2e-05	1	U	K.TTIAIDTILNQK.Q
	178	189	665.8826	1329.7506	1329.7504	0.17	0	79		1.2e-05	1	U	K.TTIAIDTILNQK.Q
	178	189	665.8826	1329.7507	1329.7504	0.26	0	79		1.2e-05	1	U	K.TTIAIDTILNQK.Q
	178	189	665.8826	1329.7507	1329.7504	0.26	0	59		0.0012	1	U	K.TTIAIDTILNQK.Q
	178	189	665.8827	1329.7509	1329.7504	0.44	0	65		0.00025	1	U	K.TTIAIDTILNQK.Q
	178	189	665.8828	1329.7511	1329.7504	0.53	0	60		0.00091	1	U	K.TTIAIDTILNQK.Q
	178	189	665.8829	1329.7512	1329.7504	0.62	0	57		0.0019	1	U	K.TTIAIDTILNQK.Q
	178	189	665.8829	1329.7512	1329.7504	0.62	0	80		9.8e-06	1	U	K.TTIAIDTILNQK.Q
	178	189	665.8829	1329.7513	1329.7504	0.71	0	74		3.8e-05	1	U	K.TTIAIDTILNQK.Q
	178	189	665.8829	1329.7513	1329.7504	0.71	0	66		0.00024	1	U	K.TTIAIDTILNQK.Q
	178	189	665.8834	1329.7522	1329.7504	1.36	0	71		6.2e-05	1	U	K.TTIAIDTILNQK.Q
	178	189	665.8837	1329.7529	1329.7504	1.91	0	56		0.0023	1	U	K.TTIAIDTILNQK.Q
	178	189	665.8839	1329.7533	1329.7504	2.18	0	58		0.0013	1	U	K.TTIAIDTILNQK.Q
	178	189	665.8840	1329.7535	1329.7504	2.36	0	48		0.015	1	U	K.TTIAIDTILNQK.Q
	178	189	665.8848	1329.7551	1329.7504	3.57	0	65		0.00024	1	U	K.TTIAIDTILNQK.Q
	283	289	438.7509	875.4873	875.4899	-2.86	0	60		0.0017	1		R.QMSLLLR.R + Oxidation (M)
	283	289	438.7511	875.4876	875.4899	-2.59	0	46		0.037	1		R.QMSLLLR.R + Oxidation (M)
	283	289	438.7511	875.4876	875.4899	-2.52	0	60		0.0017	1		R.QMSLLLR.R + Oxidation (M)
	283	289	438.7512	875.4878	875.4899	-2.38	0	46		0.035	1		R.QMSLLLR.R + Oxidation (M)
	283	289	438.7512	875.4878	875.4899	-2.31	0	60		0.0017	1		R.QMSLLLR.R + Oxidation (M)
	283	289	438.7512	875.4878	875.4899	-2.31	0	60		0.0017	1		R.QMSLLLR.R + Oxidation (M)
	283	289	438.7512	875.4879	875.4899	-2.24	0	60		0.0019	1		R.QMSLLLR.R + Oxidation (M)
	283	289	438.7513	875.4881	875.4899	-1.97	0	46		0.042	1		R.QMSLLLR.R + Oxidation (M)
	283	289	438.7514	875.4882	875.4899	-1.90	0	60		0.0019	1		R.QMSLLLR.R + Oxidation (M)
	283	289	438.7514	875.4882	875.4899	-1.90	0	60		0.0018	1		R.QMSLLLR.R + Oxidation (M)
	283	289	438.7514	875.4882	875.4899	-1.83	0	60		0.0019	1		R.QMSLLLR.R + Oxidation (M)
	283	289	438.7514	875.4882	875.4899	-1.83	0	60		0.0019	1		R.QMSLLLR.R + Oxidation (M)
	283	289	438.7514	875.4882	875.4899	-1.83	0	60		0.0019	1		R.QMSLLLR.R + Oxidation (M)
	283	289	438.7514	875.4883	875.4899	-1.76	0	60		0.0019	1		R.QMSLLLR.R + Oxidation (M)
	283	289	438.7514	875.4883	875.4899	-1.76	0	60		0.0018	1		R.QMSLLLR.R + Oxidation (M)
	283	289	438.7515	875.4884	875.4899	-1.70	0	60		0.0019	1		R.QMSLLLR.R + Oxidation (M)
	283	289	438.7515	875.4884	875.4899	-1.70	0	60		0.0019	1		R.QMSLLLR.R + Oxidation (M)
	283	289	438.7515	875.4884	875.4899	-1.70	0	60		0.0019	1		R.QMSLLLR.R + Oxidation (M)
	283	289	438.7516	875.4886	875.4899	-1.47	0	60		0.0016	1		R.QMSLLLR.R + Oxidation (M)
	283	289	438.7516	875.4886	875.4899	-1.47	0	60		0.0016	1		R.QMSLLLR.R + Oxidation (M)
	283	289	438.7516	875.4886	875.4899	-1.47	0	46		0.035	1		R.QMSLLLR.R + Oxidation (M)
	283	289	438.7516	875.4886	875.4899	-1.40	0	60		0.0016	1		R.QMSLLLR.R + Oxidation (M)
	283	289	438.7518	875.4890	875.4899	-0.92	0	47		0.031	1		R.QMSLLLR.R + Oxidation (M)
	283	289	438.7519	875.4892	875.4899	-0.78	0	60		0.0016	1		R.QMSLLLR.R + Oxidation (M)
	283	289	438.7524	875.4902	875.4899	0.41	0	60		0.0015	1		R.QMSLLLR.R + Oxidation (M)
	433	443	642.3519	1282.6892	1282.6921	-2.28	0	47		0.022	1		K.QPQYAPLPIEK.Q
	433	443	642.3524	1282.6903	1282.6921	-1.42	0	46		0.024	1		K.QPQYAPLPIEK.Q
	433	443	642.3525	1282.6904	1282.6921	-1.33	0	48		0.015	1		K.QPQYAPLPIEK.Q
	433	443	642.3525	1282.6905	1282.6921	-1.23	0	46		0.024	1		K.QPQYAPLPIEK.Q
	433	443	642.3525	1282.6905	1282.6921	-1.23	0	45		0.029	1		K.QPQYAPLPIEK.Q
	433	443	642.3526	1282.6906	1282.6921	-1.14	0	45		0.028	1		K.QPQYAPLPIEK.Q
	433	443	642.3527	1282.6908	1282.6921	-1.04	0	47		0.02	1		K.QPQYAPLPIEK.Q
	433	443	642.3527	1282.6909	1282.6921	-0.95	0	48		0.016	1		K.QPQYAPLPIEK.Q
	433	443	642.3527	1282.6909	1282.6921	-0.95	0	47		0.018	1		K.QPQYAPLPIEK.Q
	485	491	373.6922	745.3699	745.3719	-2.61	0	55		0.0055	1		K.GGLTNER.K
	485	491	373.6923	745.3701	745.3719	-2.29	0	55		0.0056	1		K.GGLTNER.K
	485	491	373.6924	745.3702	745.3719	-2.21	0	55		0.0054	1		K.GGLTNER.K
	485	491	373.6924	745.3703	745.3719	-2.05	0	55		0.0055	1		K.GGLTNER.K
	485	491	373.6924	745.3703	745.3719	-2.05	0	55		0.0054	1		K.GGLTNER.K
	485	491	373.6925	745.3704	745.3719	-1.97	0	55		0.0055	1		K.GGLTNER.K
	485	491	373.6925	745.3704	745.3719	-1.89	0	55		0.0058	1		K.GGLTNER.K
	493	500	491.7485	981.4824	981.4841	-1.68	0	47		0.02	1	U	K.MELDAFLK.E + Oxidation (M)
	493	500	491.7487	981.4829	981.4841	-1.17	0	44		0.044	1	U	K.MELDAFLK.E + Oxidation (M)
	493	500	491.7488	981.4831	981.4841	-0.99	0	50		0.011	1	U	K.MELDAFLK.E + Oxidation (M)
	493	500	491.7489	981.4832	981.4841	-0.93	0	51		0.0072	1	U	K.MELDAFLK.E + Oxidation (M)
	493	500	491.7492	981.4839	981.4841	-0.18	0	46		0.027	1	U	K.MELDAFLK.E + Oxidation (M)
14	115	124	586.8109	1171.6073	1171.6125	-4.44	0	55	42	0.0037	1		R.YLLYGDISTK.A	10
	115	124	586.8115	1171.6084	1171.6125	-3.50	0	55		0.0036	1		R.YLLYGDISTK.A
	115	124	586.8121	1171.6097	1171.6125	-2.36	0	50		0.013	1		R.YLLYGDISTK.A
	115	124	586.8122	1171.6098	1171.6125	-2.26	0	56		0.0036	1		R.YLLYGDISTK.A
	115	124	586.8124	1171.6103	1171.6125	-1.83	0	45		0.044	1		R.YLLYGDISTK.A
	115	124	586.8127	1171.6109	1171.6125	-1.32	0	60		0.0014	1		R.YLLYGDISTK.A
	115	124	586.8129	1171.6113	1171.6125	-0.99	0	60		0.0013	1		R.YLLYGDISTK.A
	115	124	586.8131	1171.6117	1171.6125	-0.69	0	60		0.0012	1		R.YLLYGDISTK.A
	115	124	586.8134	1171.6123	1171.6125	-0.16	0	60		0.0012	1		R.YLLYGDISTK.A
	125	133	484.2726	966.5307	966.5320	-1.42	0	43		0.043	1		K.AAHMLALPK.V + Oxidation (M)
	149	161	728.3605	1454.7064	1454.7154	-6.19	0	67		0.00023	1		K.SYQQAAGEVFVTR.K
	149	161	728.3637	1454.7129	1454.7154	-1.74	0	66		0.00029	1		K.SYQQAAGEVFVTR.K
	149	161	728.3638	1454.7131	1454.7154	-1.57	0	69		0.00014	1		K.SYQQAAGEVFVTR.K
	149	161	728.3638	1454.7131	1454.7154	-1.57	0	66		0.00031	1		K.SYQQAAGEVFVTR.K
	149	161	728.3639	1454.7132	1454.7154	-1.49	0	63		0.00054	1		K.SYQQAAGEVFVTR.K
	149	161	728.3641	1454.7137	1454.7154	-1.14	0	71		9.2e-05	1		K.SYQQAAGEVFVTR.K
	149	161	728.3641	1454.7137	1454.7154	-1.14	0	70		0.00011	1		K.SYQQAAGEVFVTR.K
	149	161	728.3644	1454.7142	1454.7154	-0.81	0	68		0.00017	1		K.SYQQAAGEVFVTR.K
	149	161	728.3667	1454.7188	1454.7154	2.38	0	51		0.0088	1		K.SYQQAAGEVFVTR.K
	163	173	692.8146	1383.6147	1383.6241	-6.81	0	43		0.031	1		K.FLENFCGDQVR.F
	163	173	692.8176	1383.6206	1383.6241	-2.57	0	49		0.0074	1		K.FLENFCGDQVR.F
	163	173	692.8180	1383.6215	1383.6241	-1.88	0	51		0.0057	1		K.FLENFCGDQVR.F
	163	173	692.8181	1383.6217	1383.6241	-1.78	0	51		0.0051	1		K.FLENFCGDQVR.F
	163	173	692.8186	1383.6226	1383.6241	-1.08	0	52		0.0043	1		K.FLENFCGDQVR.F
	277	285	508.2469	1014.4793	1014.4804	-1.13	0	44		0.023	1		R.MTLFTGSSR.V + Oxidation (M)
	277	285	508.2470	1014.4793	1014.4804	-1.07	0	44		0.023	1		R.MTLFTGSSR.V + Oxidation (M)
	277	285	508.2470	1014.4795	1014.4804	-0.96	0	44		0.023	1		R.MTLFTGSSR.V + Oxidation (M)
	277	285	508.2470	1014.4795	1014.4804	-0.96	0	45		0.022	1		R.MTLFTGSSR.V + Oxidation (M)
	277	285	508.2471	1014.4796	1014.4804	-0.84	0	45		0.022	1		R.MTLFTGSSR.V + Oxidation (M)
	277	285	508.2472	1014.4798	1014.4804	-0.66	0	44		0.024	1		R.MTLFTGSSR.V + Oxidation (M)
	290	295	336.7176	671.4206	671.4218	-1.76	0	54		0.0073	1		K.LALDLK.G
	300	308	540.7528	1079.4911	1079.4924	-1.21	0	57		0.0027	1		R.LEDAGFDWK.V
	300	308	540.7530	1079.4914	1079.4924	-0.87	0	56		0.0027	1		R.LEDAGFDWK.V
	441	453	785.9108	1569.8071	1569.8079	-0.50	0	49		0.012	1		K.EIFGPFQIVTEYK.K
	455	466	691.3861	1380.7577	1380.7613	-2.60	0	66		0.00023	1	U	K.DQLPLVLDALER.M
	455	466	691.3872	1380.7599	1380.7613	-1.01	0	66		0.00022	1	U	K.DQLPLVLDALER.M
	455	466	691.3889	1380.7633	1380.7613	1.47	0	57		0.0016	1	U	K.DQLPLVLDALER.M
	520	530	507.2840	1012.5535	1012.5553	-1.77	0	55		0.0031	1		R.GAGIGTPEAIK.L
	520	530	507.2844	1012.5543	1012.5553	-1.00	0	54		0.0035	1		R.GAGIGTPEAIK.L
	520	530	507.2846	1012.5547	1012.5553	-0.56	0	49		0.011	1		R.GAGIGTPEAIK.L
	520	530	507.2849	1012.5551	1012.5553	-0.15	0	54		0.0039	1		R.GAGIGTPEAIK.L
15	115	124	586.8095	1171.6045	1171.6125	-6.83	0	47	43	0.027	1		R.YLLYGDISTK.A	12
	115	124	586.8127	1171.6109	1171.6125	-1.32	0	57		0.003	1		R.YLLYGDISTK.A
	115	124	586.8127	1171.6109	1171.6125	-1.32	0	45		0.044	1		R.YLLYGDISTK.A
	115	124	586.8130	1171.6114	1171.6125	-0.89	0	60		0.0012	1		R.YLLYGDISTK.A
	115	124	586.8130	1171.6114	1171.6125	-0.89	0	60		0.0014	1		R.YLLYGDISTK.A
	115	124	586.8132	1171.6118	1171.6125	-0.58	0	50		0.014	1		R.YLLYGDISTK.A
	115	124	586.8133	1171.6120	1171.6125	-0.38	0	60		0.0014	1		R.YLLYGDISTK.A
	115	124	586.8134	1171.6121	1171.6125	-0.28	0	58		0.0024	1		R.YLLYGDISTK.A
	115	124	586.8134	1171.6123	1171.6125	-0.16	0	60		0.0014	1		R.YLLYGDISTK.A
	115	124	586.8134	1171.6123	1171.6125	-0.16	0	60		0.0013	1		R.YLLYGDISTK.A
	115	124	586.8134	1171.6123	1171.6125	-0.16	0	57		0.0029	1		R.YLLYGDISTK.A
	115	124	586.8134	1171.6123	1171.6125	-0.16	0	47		0.026	1		R.YLLYGDISTK.A
	115	124	586.8135	1171.6124	1171.6125	-0.055	0	60		0.0013	1		R.YLLYGDISTK.A
	115	124	586.8135	1171.6124	1171.6125	-0.055	0	60		0.0012	1		R.YLLYGDISTK.A
	115	124	586.8135	1171.6125	1171.6125	0.047	0	60		0.0013	1		R.YLLYGDISTK.A
	115	124	586.8138	1171.6131	1171.6125	0.56	0	61		0.0012	1		R.YLLYGDISTK.A
	125	133	484.2724	966.5303	966.5320	-1.80	0	43		0.043	1		K.AAHMLALPK.V + Oxidation (M)
	125	133	484.2727	966.5308	966.5320	-1.30	0	44		0.04	1		K.AAHMLALPK.V + Oxidation (M)
	149	161	728.3616	1454.7087	1454.7154	-4.60	0	71		8.6e-05	1		K.SYQQAAGEVFVTR.K
	149	161	728.3632	1454.7118	1454.7154	-2.49	0	57		0.002	1		K.SYQQAAGEVFVTR.K
	149	161	728.3640	1454.7133	1454.7154	-1.41	0	49		0.015	1		K.SYQQAAGEVFVTR.K
	149	161	728.3640	1454.7135	1454.7154	-1.32	0	49		0.014	1		K.SYQQAAGEVFVTR.K
	149	161	728.3641	1454.7136	1454.7154	-1.24	0	67		0.00022	1		K.SYQQAAGEVFVTR.K
	149	161	485.9118	1454.7137	1454.7154	-1.19	0	63		0.00052	1		K.SYQQAAGEVFVTR.K
	149	161	728.3643	1454.7141	1454.7154	-0.90	0	60		0.00099	1		K.SYQQAAGEVFVTR.K
	149	161	728.3644	1454.7143	1454.7154	-0.73	0	70		0.00012	1		K.SYQQAAGEVFVTR.K
	149	161	728.3644	1454.7143	1454.7154	-0.73	0	47		0.022	1		K.SYQQAAGEVFVTR.K
	149	161	728.3646	1454.7146	1454.7154	-0.57	0	60		0.001	1		K.SYQQAAGEVFVTR.K
	149	161	728.3647	1454.7148	1454.7154	-0.39	0	70		0.00012	1		K.SYQQAAGEVFVTR.K
	149	161	485.9123	1454.7150	1454.7154	-0.30	0	59		0.0013	1		K.SYQQAAGEVFVTR.K
	149	161	728.3648	1454.7151	1454.7154	-0.22	0	62		0.00064	1		K.SYQQAAGEVFVTR.K
	149	161	728.3648	1454.7151	1454.7154	-0.22	0	44		0.047	1		K.SYQQAAGEVFVTR.K
	149	161	728.3649	1454.7153	1454.7154	-0.058	0	46		0.027	1		K.SYQQAAGEVFVTR.K
	149	161	728.3650	1454.7155	1454.7154	0.11	0	63		0.00057	1		K.SYQQAAGEVFVTR.K
	149	161	728.3650	1454.7155	1454.7154	0.11	0	65		0.00038	1		K.SYQQAAGEVFVTR.K
	149	161	728.3652	1454.7159	1454.7154	0.35	0	48		0.02	1		K.SYQQAAGEVFVTR.K
	149	161	728.3654	1454.7162	1454.7154	0.53	0	77		2.1e-05	1		K.SYQQAAGEVFVTR.K
	149	161	728.3655	1454.7164	1454.7154	0.70	0	68		0.00019	1		K.SYQQAAGEVFVTR.K
	149	161	728.3655	1454.7164	1454.7154	0.70	0	76		2.9e-05	1		K.SYQQAAGEVFVTR.K
	149	161	728.3657	1454.7168	1454.7154	0.95	0	77		2.3e-05	1		K.SYQQAAGEVFVTR.K
	149	161	728.3664	1454.7182	1454.7154	1.95	0	72		7.6e-05	1		K.SYQQAAGEVFVTR.K
	149	161	728.3667	1454.7188	1454.7154	2.38	0	66		0.00028	1		K.SYQQAAGEVFVTR.K
	149	161	728.3678	1454.7210	1454.7154	3.89	0	45		0.035	1		K.SYQQAAGEVFVTR.K
	163	173	692.8182	1383.6219	1383.6241	-1.60	0	48		0.011	1		K.FLENFCGDQVR.F
	163	173	692.8184	1383.6223	1383.6241	-1.34	0	48		0.0099	1		K.FLENFCGDQVR.F
	163	173	692.8185	1383.6224	1383.6241	-1.26	0	50		0.0063	1		K.FLENFCGDQVR.F
	163	173	692.8185	1383.6225	1383.6241	-1.17	0	48		0.0098	1		K.FLENFCGDQVR.F
	163	173	692.8187	1383.6228	1383.6241	-1.00	0	59		0.00077	1		K.FLENFCGDQVR.F
	163	173	692.8190	1383.6234	1383.6241	-0.55	0	50		0.0068	1		K.FLENFCGDQVR.F
	235	244	628.2946	1254.5747	1254.5770	-1.88	0	54		0.0034	1		K.VSIVMEQMMR.L + 2 Oxidation (M)
	235	244	628.2948	1254.5750	1254.5770	-1.59	0	48		0.013	1		K.VSIVMEQMMR.L + 2 Oxidation (M)
	235	244	628.2949	1254.5752	1254.5770	-1.49	0	54		0.0036	1		K.VSIVMEQMMR.L + 2 Oxidation (M)
	235	244	628.2949	1254.5752	1254.5770	-1.49	0	43		0.042	1		K.VSIVMEQMMR.L + 2 Oxidation (M)
	277	285	508.2468	1014.4790	1014.4804	-1.43	0	45		0.022	1		R.MTLFTGSSR.V + Oxidation (M)
	277	285	508.2468	1014.4791	1014.4804	-1.31	0	45		0.023	1		R.MTLFTGSSR.V + Oxidation (M)
	277	285	508.2471	1014.4796	1014.4804	-0.78	0	45		0.022	1		R.MTLFTGSSR.V + Oxidation (M)
	290	295	336.7179	671.4212	671.4218	-0.75	0	54		0.0065	1		K.LALDLK.G
	290	295	336.7181	671.4215	671.4218	-0.31	0	54		0.0066	1		K.LALDLK.G
	300	308	540.7520	1079.4895	1079.4924	-2.69	0	50		0.012	1		R.LEDAGFDWK.V
	300	308	540.7526	1079.4906	1079.4924	-1.67	0	64		0.0005	1		R.LEDAGFDWK.V
	300	308	540.7533	1079.4920	1079.4924	-0.30	0	65		0.00037	1		R.LEDAGFDWK.V
	300	308	540.7534	1079.4923	1079.4924	-0.077	0	57		0.0026	1		R.LEDAGFDWK.V
	300	308	540.7534	1079.4923	1079.4924	-0.077	0	65		0.00037	1		R.LEDAGFDWK.V
	300	308	540.7535	1079.4924	1079.4924	0.034	0	65		0.00037	1		R.LEDAGFDWK.V
	300	308	540.7535	1079.4924	1079.4924	0.034	0	59		0.0014	1		R.LEDAGFDWK.V
	300	308	540.7536	1079.4926	1079.4924	0.26	0	58		0.0021	1		R.LEDAGFDWK.V
	300	308	540.7537	1079.4929	1079.4924	0.48	0	61		0.0011	1		R.LEDAGFDWK.V
	300	308	540.7538	1079.4930	1079.4924	0.59	0	68		0.00019	1		R.LEDAGFDWK.V
	434	440	427.2362	852.4577	852.4593	-1.79	0	45		0.031	1		K.TYELVTK.E
	434	440	427.2363	852.4580	852.4593	-1.44	0	45		0.03	1		K.TYELVTK.E
	441	453	785.9110	1569.8075	1569.8079	-0.27	0	51		0.0079	1		K.EIFGPFQIVTEYK.K
	455	466	691.3862	1380.7578	1380.7613	-2.52	0	53		0.0039	1		K.DQLPLVLDALER.M
	455	466	691.3872	1380.7599	1380.7613	-1.01	0	61		0.00061	1		K.DQLPLVLDALER.M
	455	466	691.3873	1380.7601	1380.7613	-0.84	0	57		0.0016	1		K.DQLPLVLDALER.M
	520	530	507.2841	1012.5536	1012.5553	-1.71	0	51		0.0076	1		R.GAGIGTPEAIK.L
	520	530	507.2841	1012.5536	1012.5553	-1.65	0	50		0.0097	1		R.GAGIGTPEAIK.L
	520	530	507.2842	1012.5537	1012.5553	-1.53	0	49		0.013	1		R.GAGIGTPEAIK.L
	520	530	507.2844	1012.5542	1012.5553	-1.12	0	54		0.0038	1		R.GAGIGTPEAIK.L
16	98	106	460.2750	918.5354	918.5386	-3.44	0	57	43	0.0021	1		K.TTLTAAITK.V	15
	98	106	460.2753	918.5360	918.5386	-2.83	0	57		0.0021	1		K.TTLTAAITK.V
	116	124	511.2625	1020.5105	1020.5128	-2.18	0	50		0.023	1		K.AIAFDEIDK.A
	116	124	511.2626	1020.5106	1020.5128	-2.12	0	55		0.0073	1		K.AIAFDEIDK.A
	116	124	511.2626	1020.5106	1020.5128	-2.07	0	55		0.0074	1		K.AIAFDEIDK.A
	116	129	788.3970	1574.7794	1574.7828	-2.14	1	66		0.0004	1		K.AIAFDEIDKAPEEK.K
	116	129	788.3972	1574.7798	1574.7828	-1.90	1	70		0.00013	1		K.AIAFDEIDKAPEEK.K
	116	129	525.9340	1574.7801	1574.7828	-1.72	1	52		0.0086	1		K.AIAFDEIDKAPEEK.K
	116	129	525.9340	1574.7802	1574.7828	-1.61	1	45		0.048	1		K.AIAFDEIDKAPEEK.K
	116	129	788.3975	1574.7805	1574.7828	-1.44	1	65		0.00042	1		K.AIAFDEIDKAPEEK.K
	116	129	788.3976	1574.7806	1574.7828	-1.37	1	66		0.00038	1		K.AIAFDEIDKAPEEK.K
	116	129	788.3976	1574.7807	1574.7828	-1.29	1	68		0.00022	1		K.AIAFDEIDKAPEEK.K
	116	129	788.3976	1574.7807	1574.7828	-1.29	1	54		0.0052	1		K.AIAFDEIDKAPEEK.K
	116	129	788.3977	1574.7809	1574.7828	-1.20	1	71		0.00011	1		K.AIAFDEIDKAPEEK.K
	116	129	788.3978	1574.7810	1574.7828	-1.13	1	68		0.00022	1		K.AIAFDEIDKAPEEK.K
	116	129	788.3981	1574.7817	1574.7828	-0.67	1	52		0.0091	1		K.AIAFDEIDKAPEEK.K
	116	129	525.9348	1574.7826	1574.7828	-0.10	1	63		0.00069	1		K.AIAFDEIDKAPEEK.K
	116	129	788.3991	1574.7837	1574.7828	0.58	1	49		0.018	1		K.AIAFDEIDKAPEEK.K
	132	146	802.4153	1602.8160	1602.8253	-5.81	0	63		0.00067	1		R.GITIATAHVEYETAK.R
	132	146	802.4153	1602.8160	1602.8253	-5.81	0	74		5.9e-05	1		R.GITIATAHVEYETAK.R
	132	146	802.4156	1602.8166	1602.8253	-5.42	0	45		0.04	1		R.GITIATAHVEYETAK.R
	132	146	802.4156	1602.8166	1602.8253	-5.42	0	53		0.0074	1		R.GITIATAHVEYETAK.R
	132	146	802.4169	1602.8192	1602.8253	-3.82	0	77		2.7e-05	1		R.GITIATAHVEYETAK.R
	132	146	802.4177	1602.8209	1602.8253	-2.76	0	54		0.0059	1		R.GITIATAHVEYETAK.R
	132	146	535.2810	1602.8212	1602.8253	-2.57	0	45		0.041	1		R.GITIATAHVEYETAK.R
	132	146	802.4181	1602.8216	1602.8253	-2.30	0	61		0.0011	1		R.GITIATAHVEYETAK.R
	132	146	535.2813	1602.8221	1602.8253	-2.01	0	48		0.023	1		R.GITIATAHVEYETAK.R
	132	146	535.2813	1602.8221	1602.8253	-2.01	0	47		0.028	1		R.GITIATAHVEYETAK.R
	132	146	802.4184	1602.8222	1602.8253	-1.91	0	68		0.00022	1		R.GITIATAHVEYETAK.R
	132	146	802.4186	1602.8226	1602.8253	-1.69	0	70		0.00014	1		R.GITIATAHVEYETAK.R
	132	146	802.4186	1602.8227	1602.8253	-1.62	0	85		3.9e-06	1		R.GITIATAHVEYETAK.R
	132	146	802.4187	1602.8228	1602.8253	-1.54	0	75		4.2e-05	1		R.GITIATAHVEYETAK.R
	132	146	802.4187	1602.8228	1602.8253	-1.54	0	63		0.00068	1		R.GITIATAHVEYETAK.R
	132	146	802.4190	1602.8235	1602.8253	-1.15	0	56		0.0033	1		R.GITIATAHVEYETAK.R
	132	146	802.4192	1602.8238	1602.8253	-0.93	0	89		1.6e-06	1		R.GITIATAHVEYETAK.R
	132	146	802.4192	1602.8238	1602.8253	-0.93	0	48		0.021	1		R.GITIATAHVEYETAK.R
	132	146	802.4193	1602.8239	1602.8253	-0.85	0	53		0.0073	1		R.GITIATAHVEYETAK.R
	132	146	802.4193	1602.8241	1602.8253	-0.78	0	91		1e-06	1		R.GITIATAHVEYETAK.R
	132	146	802.4196	1602.8246	1602.8253	-0.47	0	89		1.8e-06	1		R.GITIATAHVEYETAK.R
	132	146	802.4196	1602.8247	1602.8253	-0.39	0	80		1.2e-05	1		R.GITIATAHVEYETAK.R
	132	146	802.4199	1602.8253	1602.8253	-0.018	0	63		0.00062	1		R.GITIATAHVEYETAK.R
	132	146	802.4200	1602.8255	1602.8253	0.13	0	75		4.2e-05	1		R.GITIATAHVEYETAK.R
	132	146	802.4202	1602.8258	1602.8253	0.29	0	89		1.8e-06	1		R.GITIATAHVEYETAK.R
	132	146	802.4202	1602.8259	1602.8253	0.37	0	70		0.00014	1		R.GITIATAHVEYETAK.R
	132	146	802.4202	1602.8259	1602.8253	0.37	0	68		0.00021	1		R.GITIATAHVEYETAK.R
	132	146	802.4206	1602.8266	1602.8253	0.82	0	56		0.0033	1		R.GITIATAHVEYETAK.R
	132	146	802.4208	1602.8270	1602.8253	1.06	0	56		0.0036	1		R.GITIATAHVEYETAK.R
	132	146	802.4208	1602.8271	1602.8253	1.13	0	56		0.0036	1		R.GITIATAHVEYETAK.R
	132	146	802.4232	1602.8319	1602.8253	4.10	0	85		4.1e-06	1		R.GITIATAHVEYETAK.R
	163	189	911.7668	2732.2787	2732.2820	-1.19	0	94		2.6e-07	1	U	K.NMITGAAQMDGGILVVSGPDGPMPQTK.E + 3 Oxidation (M)
	163	189	911.7675	2732.2806	2732.2820	-0.52	0	94		3e-07	1	U	K.NMITGAAQMDGGILVVSGPDGPMPQTK.E + 3 Oxidation (M)
	163	189	911.7689	2732.2849	2732.2820	1.09	0	85		2.1e-06	1	U	K.NMITGAAQMDGGILVVSGPDGPMPQTK.E + 3 Oxidation (M)
	190	196	426.2557	850.4968	850.5025	-6.64	0	43		0.033	1		K.EHILLAR.Q
	235	244	571.8088	1141.6031	1141.6132	-8.79	0	45		0.039	1	U	K.FPGDDIPIIR.G
	235	244	571.8119	1141.6092	1141.6132	-3.44	0	44		0.043	1	U	K.FPGDDIPIIR.G
	235	244	571.8121	1141.6096	1141.6132	-3.13	0	46		0.031	1	U	K.FPGDDIPIIR.G
	235	244	571.8124	1141.6102	1141.6132	-2.58	0	46		0.031	1	U	K.FPGDDIPIIR.G
	235	244	571.8127	1141.6108	1141.6132	-2.06	0	50		0.011	1	U	K.FPGDDIPIIR.G
	235	244	571.8128	1141.6111	1141.6132	-1.83	0	45		0.036	1	U	K.FPGDDIPIIR.G
	235	244	571.8130	1141.6115	1141.6132	-1.41	0	48		0.019	1	U	K.FPGDDIPIIR.G
	235	244	571.8135	1141.6124	1141.6132	-0.66	0	55		0.0041	1	U	K.FPGDDIPIIR.G
	235	244	571.8136	1141.6126	1141.6132	-0.45	0	53		0.0055	1	U	K.FPGDDIPIIR.G
	235	244	571.8153	1141.6161	1141.6132	2.55	0	50		0.012	1	U	K.FPGDDIPIIR.G
	245	260	794.8976	1587.7806	1587.7852	-2.92	0	94		5.2e-07	1		R.GSALSALQGTNDEIGR.Q
	245	260	794.8980	1587.7813	1587.7852	-2.46	0	93		5.9e-07	1		R.GSALSALQGTNDEIGR.Q
	266	279	816.8989	1631.7832	1631.7865	-2.04	0	86		2.8e-06	1		K.LMDAVDEYIPDPVR.V
	266	279	816.8995	1631.7844	1631.7865	-1.28	0	71		9e-05	1		K.LMDAVDEYIPDPVR.V
	266	279	824.8949	1647.7752	1647.7814	-3.74	0	74		3.9e-05	1		K.LMDAVDEYIPDPVR.V + Oxidation (M)
	266	279	824.8956	1647.7767	1647.7814	-2.86	0	74		4.2e-05	1		K.LMDAVDEYIPDPVR.V + Oxidation (M)
	266	279	824.8957	1647.7768	1647.7814	-2.79	0	74		3.8e-05	1		K.LMDAVDEYIPDPVR.V + Oxidation (M)
	266	279	824.8962	1647.7778	1647.7814	-2.19	0	74		3.8e-05	1		K.LMDAVDEYIPDPVR.V + Oxidation (M)
	266	279	824.8962	1647.7779	1647.7814	-2.12	0	78		1.6e-05	1		K.LMDAVDEYIPDPVR.V + Oxidation (M)
	266	279	824.8967	1647.7789	1647.7814	-1.52	0	84		4.6e-06	1		K.LMDAVDEYIPDPVR.V + Oxidation (M)
	266	279	824.8968	1647.7791	1647.7814	-1.38	0	88		1.6e-06	1		K.LMDAVDEYIPDPVR.V + Oxidation (M)
	266	279	824.8975	1647.7804	1647.7814	-0.64	0	78		1.8e-05	1		K.LMDAVDEYIPDPVR.V + Oxidation (M)
	266	279	824.8983	1647.7821	1647.7814	0.41	0	72		7.1e-05	1		K.LMDAVDEYIPDPVR.V + Oxidation (M)
	266	279	824.8986	1647.7827	1647.7814	0.77	0	67		0.0002	1		K.LMDAVDEYIPDPVR.V + Oxidation (M)
	266	279	824.8999	1647.7852	1647.7814	2.32	0	95		3.5e-07	1		K.LMDAVDEYIPDPVR.V + Oxidation (M)
	331	340	549.7773	1097.5401	1097.5427	-2.35	0	63		0.0005	1		K.STVTGVEMFK.K
	331	340	557.7745	1113.5344	1113.5376	-2.89	0	45		0.028	1		K.STVTGVEMFK.K + Oxidation (M)
	331	340	557.7746	1113.5346	1113.5376	-2.68	0	53		0.0048	1		K.STVTGVEMFK.K + Oxidation (M)
	331	340	557.7748	1113.5351	1113.5376	-2.25	0	54		0.0037	1		K.STVTGVEMFK.K + Oxidation (M)
	331	340	557.7749	1113.5352	1113.5376	-2.14	0	56		0.002	1		K.STVTGVEMFK.K + Oxidation (M)
	331	340	557.7753	1113.5360	1113.5376	-1.47	0	46		0.024	1		K.STVTGVEMFK.K + Oxidation (M)
	342	357	834.4536	1666.8927	1666.9002	-4.53	0	104		3e-08	1	U	K.ILDNGQAGDNVGLLLR.G
	342	357	834.4556	1666.8966	1666.9002	-2.18	0	102		5.5e-08	1	U	K.ILDNGQAGDNVGLLLR.G
	342	357	834.4559	1666.8972	1666.9002	-1.82	0	97		1.5e-07	1	U	K.ILDNGQAGDNVGLLLR.G
	342	357	834.4562	1666.8978	1666.9002	-1.45	0	113		4.2e-09	1	U	K.ILDNGQAGDNVGLLLR.G
	342	357	834.4562	1666.8979	1666.9002	-1.38	0	107		1.5e-08	1	U	K.ILDNGQAGDNVGLLLR.G
	342	357	556.6399	1666.8980	1666.9002	-1.32	0	63		0.00043	1	U	K.ILDNGQAGDNVGLLLR.G
	342	357	556.6401	1666.8984	1666.9002	-1.09	0	76		1.8e-05	1	U	K.ILDNGQAGDNVGLLLR.G
	342	357	556.6402	1666.8988	1666.9002	-0.87	0	86		2.2e-06	1	U	K.ILDNGQAGDNVGLLLR.G
	342	357	834.4567	1666.8989	1666.9002	-0.79	0	66		0.00021	1	U	K.ILDNGQAGDNVGLLLR.G
	342	357	834.4578	1666.9011	1666.9002	0.52	0	94		3.5e-07	1	U	K.ILDNGQAGDNVGLLLR.G
	367	377	582.2993	1162.5840	1162.5838	0.10	0	50		0.015	1	U	R.GMVIAKPGSCK.T + Oxidation (M)
	382	391	606.8289	1211.6432	1211.6438	-0.50	0	59		0.0016	1		K.FEAEIYVLTK.D
	419	426	464.2595	926.5045	926.5073	-2.95	0	45		0.025	1		K.VELPENVK.M
	460	468	409.2414	816.4682	816.4705	-2.90	0	51		0.012	1		R.TVGAGVVSK.V
	460	468	409.2421	816.4696	816.4705	-1.09	0	58		0.0022	1		R.TVGAGVVSK.V
	460	468	409.2424	816.4702	816.4705	-0.35	0	56		0.0036	1		R.TVGAGVVSK.V
17	98	106	460.2761	918.5376	918.5386	-1.05	0	57	43	0.0021	1		K.TTLTAAITK.V	13
	116	124	511.2634	1020.5122	1020.5128	-0.56	0	55		0.0073	1	U	K.AIAFDEIDK.A
	116	124	511.2637	1020.5129	1020.5128	0.15	0	55		0.0073	1	U	K.AIAFDEIDK.A
	116	129	788.3983	1574.7821	1574.7828	-0.43	1	60		0.0014	1	U	K.AIAFDEIDKAPEEK.K
	116	129	788.3984	1574.7822	1574.7828	-0.35	1	65		0.00043	1	U	K.AIAFDEIDKAPEEK.K
	116	129	788.3986	1574.7827	1574.7828	-0.046	1	70		0.00013	1	U	K.AIAFDEIDKAPEEK.K
	116	129	788.3987	1574.7828	1574.7828	0.030	1	70		0.00013	1	U	K.AIAFDEIDKAPEEK.K
	116	129	525.9351	1574.7834	1574.7828	0.38	1	46		0.037	1	U	K.AIAFDEIDKAPEEK.K
	116	129	525.9352	1574.7839	1574.7828	0.72	1	47		0.03	1	U	K.AIAFDEIDKAPEEK.K
	116	129	788.3998	1574.7851	1574.7828	1.50	1	60		0.0015	1	U	K.AIAFDEIDKAPEEK.K
	116	129	788.4011	1574.7877	1574.7828	3.13	1	49		0.017	1	U	K.AIAFDEIDKAPEEK.K
	132	146	802.4189	1602.8232	1602.8253	-1.32	0	71		0.00011	1		R.GITIATAHVEYETAK.R
	132	146	802.4193	1602.8241	1602.8253	-0.78	0	54		0.0054	1		R.GITIATAHVEYETAK.R
	132	146	802.4196	1602.8247	1602.8253	-0.39	0	58		0.002	1		R.GITIATAHVEYETAK.R
	132	146	802.4198	1602.8250	1602.8253	-0.17	0	53		0.0074	1		R.GITIATAHVEYETAK.R
	132	146	535.2823	1602.8252	1602.8253	-0.059	0	55		0.004	1		R.GITIATAHVEYETAK.R
	132	146	535.2826	1602.8259	1602.8253	0.39	0	56		0.0037	1		R.GITIATAHVEYETAK.R
	132	146	802.4206	1602.8266	1602.8253	0.82	0	88		2e-06	1		R.GITIATAHVEYETAK.R
	132	146	802.4206	1602.8266	1602.8253	0.82	0	67		0.00025	1		R.GITIATAHVEYETAK.R
	132	146	802.4208	1602.8270	1602.8253	1.06	0	51		0.011	1		R.GITIATAHVEYETAK.R
	132	146	802.4213	1602.8280	1602.8253	1.65	0	80		1.3e-05	1		R.GITIATAHVEYETAK.R
	132	146	802.4213	1602.8280	1602.8253	1.65	0	52		0.0077	1		R.GITIATAHVEYETAK.R
	132	146	802.4216	1602.8287	1602.8253	2.12	0	71		0.0001	1		R.GITIATAHVEYETAK.R
	132	146	802.4216	1602.8287	1602.8253	2.12	0	80		1.4e-05	1		R.GITIATAHVEYETAK.R
	132	146	802.4224	1602.8303	1602.8253	3.10	0	75		4.7e-05	1		R.GITIATAHVEYETAK.R
	132	146	802.4229	1602.8313	1602.8253	3.71	0	48		0.019	1		R.GITIATAHVEYETAK.R
	132	146	802.4236	1602.8327	1602.8253	4.64	0	59		0.0017	1		R.GITIATAHVEYETAK.R
	132	146	802.4243	1602.8341	1602.8253	5.47	0	63		0.00062	1		R.GITIATAHVEYETAK.R
	132	146	802.4265	1602.8383	1602.8253	8.13	0	51		0.011	1		R.GITIATAHVEYETAK.R
	132	146	802.4293	1602.8440	1602.8253	11.6	0	78		1.9e-05	1		R.GITIATAHVEYETAK.R
	163	189	911.7678	2732.2816	2732.2820	-0.12	0	59		0.00091	1	U	K.NMITGAAQMDGGILVVSGPDGPMPQTK.E + 3 Oxidation (M)
	163	189	911.7687	2732.2842	2732.2820	0.82	0	92		4.4e-07	1	U	K.NMITGAAQMDGGILVVSGPDGPMPQTK.E + 3 Oxidation (M)
	163	189	911.7692	2732.2857	2732.2820	1.36	0	94		2.6e-07	1	U	K.NMITGAAQMDGGILVVSGPDGPMPQTK.E + 3 Oxidation (M)
	163	189	911.7704	2732.2895	2732.2820	2.77	0	77		1.4e-05	1	U	K.NMITGAAQMDGGILVVSGPDGPMPQTK.E + 3 Oxidation (M)
	235	244	571.8138	1141.6130	1141.6132	-0.13	0	50		0.011	1	U	K.FPGDDIPIIR.G
	235	244	571.8139	1141.6132	1141.6132	0.078	0	56		0.0032	1	U	K.FPGDDIPIIR.G
	235	244	571.8140	1141.6134	1141.6132	0.18	0	53		0.0052	1	U	K.FPGDDIPIIR.G
	235	244	571.8140	1141.6135	1141.6132	0.31	0	50		0.012	1	U	K.FPGDDIPIIR.G
	235	244	571.8141	1141.6136	1141.6132	0.41	0	47		0.023	1	U	K.FPGDDIPIIR.G
	235	244	571.8142	1141.6137	1141.6132	0.52	0	53		0.0065	1	U	K.FPGDDIPIIR.G
	235	244	571.8142	1141.6139	1141.6132	0.62	0	46		0.028	1	U	K.FPGDDIPIIR.G
	235	244	571.8144	1141.6143	1141.6132	1.04	0	50		0.012	1	U	K.FPGDDIPIIR.G
	235	244	571.8146	1141.6147	1141.6132	1.37	0	54		0.0044	1	U	K.FPGDDIPIIR.G
	235	244	571.8147	1141.6148	1141.6132	1.48	0	46		0.027	1	U	K.FPGDDIPIIR.G
	245	260	794.8992	1587.7839	1587.7852	-0.84	0	92		8.1e-07	1		R.GSALSALQGTNDEIGR.Q
	245	260	794.8996	1587.7846	1587.7852	-0.38	0	99		1.6e-07	1		R.GSALSALQGTNDEIGR.Q
	245	260	794.9000	1587.7855	1587.7852	0.15	0	93		6.3e-07	1		R.GSALSALQGTNDEIGR.Q
	245	260	794.9002	1587.7857	1587.7852	0.31	0	83		6.6e-06	1		R.GSALSALQGTNDEIGR.Q
	266	279	816.9009	1631.7872	1631.7865	0.43	0	78		1.9e-05	1		K.LMDAVDEYIPDPVR.V
	266	279	816.9017	1631.7889	1631.7865	1.48	0	83		5.5e-06	1		K.LMDAVDEYIPDPVR.V
	266	279	816.9017	1631.7889	1631.7865	1.48	0	88		1.8e-06	1		K.LMDAVDEYIPDPVR.V
	266	279	816.9032	1631.7918	1631.7865	3.28	0	68		0.0002	1		K.LMDAVDEYIPDPVR.V
	266	279	824.8982	1647.7818	1647.7814	0.25	0	74		4.3e-05	1		K.LMDAVDEYIPDPVR.V + Oxidation (M)
	266	279	824.8987	1647.7829	1647.7814	0.92	0	74		4.1e-05	1		K.LMDAVDEYIPDPVR.V + Oxidation (M)
	266	279	824.8988	1647.7830	1647.7814	0.99	0	74		4.4e-05	1		K.LMDAVDEYIPDPVR.V + Oxidation (M)
	266	279	824.8988	1647.7830	1647.7814	0.99	0	88		1.6e-06	1		K.LMDAVDEYIPDPVR.V + Oxidation (M)
	266	279	824.8991	1647.7837	1647.7814	1.37	0	74		4e-05	1		K.LMDAVDEYIPDPVR.V + Oxidation (M)
	331	340	549.7786	1097.5427	1097.5427	-0.00091	0	63		0.00049	1		K.STVTGVEMFK.K
	331	340	557.7755	1113.5365	1113.5376	-1.04	0	45		0.026	1		K.STVTGVEMFK.K + Oxidation (M)
	331	340	557.7758	1113.5371	1113.5376	-0.48	0	44		0.038	1		K.STVTGVEMFK.K + Oxidation (M)
	331	340	557.7759	1113.5372	1113.5376	-0.38	0	45		0.027	1		K.STVTGVEMFK.K + Oxidation (M)
	331	340	557.7759	1113.5373	1113.5376	-0.27	0	51		0.0078	1		K.STVTGVEMFK.K + Oxidation (M)
	331	340	557.7764	1113.5383	1113.5376	0.61	0	66		0.00025	1		K.STVTGVEMFK.K + Oxidation (M)
	342	357	834.4496	1666.8846	1666.9002	-9.37	0	73		4.7e-05	1	U	K.ILDNGQAGDNVGLLLR.G
	342	357	834.4575	1666.9004	1666.9002	0.087	0	127		1.5e-10	1	U	K.ILDNGQAGDNVGLLLR.G
	342	357	556.6409	1666.9010	1666.9002	0.44	0	75		2.4e-05	1	U	K.ILDNGQAGDNVGLLLR.G
	342	357	834.4578	1666.9011	1666.9002	0.52	0	97		1.5e-07	1	U	K.ILDNGQAGDNVGLLLR.G
	342	357	834.4578	1666.9011	1666.9002	0.52	0	97		1.5e-07	1	U	K.ILDNGQAGDNVGLLLR.G
	342	357	834.4579	1666.9012	1666.9002	0.60	0	97		1.4e-07	1	U	K.ILDNGQAGDNVGLLLR.G
	342	357	834.4579	1666.9013	1666.9002	0.67	0	97		1.4e-07	1	U	K.ILDNGQAGDNVGLLLR.G
	342	357	556.6422	1666.9048	1666.9002	2.75	0	57		0.0015	1	U	K.ILDNGQAGDNVGLLLR.G
	342	357	834.4600	1666.9055	1666.9002	3.16	0	97		1.5e-07	1	U	K.ILDNGQAGDNVGLLLR.G
	342	357	556.6427	1666.9063	1666.9002	3.63	0	57		0.0015	1	U	K.ILDNGQAGDNVGLLLR.G
	342	357	834.4615	1666.9084	1666.9002	4.92	0	94		3.1e-07	1	U	K.ILDNGQAGDNVGLLLR.G
	382	391	606.8296	1211.6446	1211.6438	0.71	0	48		0.021	1		K.FEAEIYVLTK.D
	419	426	464.2602	926.5059	926.5073	-1.44	0	47		0.016	1		K.VELPENVK.M
	460	468	409.2419	816.4693	816.4705	-1.55	0	51		0.011	1		R.TVGAGVVSK.V
18	58	74	669.6449	2005.9129	2005.9085	2.18	0	49	43	0.0077	1	U	R.IQVQNPIVEMDGDEMTR.V + 2 Oxidation (M)	9
	58	74	1003.9646	2005.9146	2005.9085	3.07	0	42		0.039	1	U	R.IQVQNPIVEMDGDEMTR.V + 2 Oxidation (M)
	58	74	1003.9646	2005.9146	2005.9085	3.07	0	46		0.016	1	U	R.IQVQNPIVEMDGDEMTR.V + 2 Oxidation (M)
	84	94	658.3986	1314.7826	1314.7799	2.06	0	52		0.0028	1	U	K.LILPYLDLDIK.Y
	95	103	555.8044	1109.5943	1109.5869	6.67	0	48		0.014	1		K.YFDLGILNR.D
	110	120	559.3095	1116.6045	1116.6026	1.65	0	62		0.00079	1		K.VTVESAEAALK.Y
	110	120	559.3096	1116.6047	1116.6026	1.86	0	64		0.00051	1		K.VTVESAEAALK.Y
	127	136	560.2589	1118.5033	1118.5026	0.57	0	62		0.00045	1		K.CATITPDEGR.V
	127	136	560.2591	1118.5036	1118.5026	0.90	0	82		4.2e-06	1		K.CATITPDEGR.V
	127	136	560.2594	1118.5042	1118.5026	1.45	0	82		4e-06	1		K.CATITPDEGR.V
	127	136	560.2595	1118.5045	1118.5026	1.67	0	81		4.8e-06	1		K.CATITPDEGR.V
	127	136	560.2596	1118.5046	1118.5026	1.77	0	82		4.3e-06	1		K.CATITPDEGR.V
	127	136	560.2596	1118.5047	1118.5026	1.88	0	82		4.3e-06	1		K.CATITPDEGR.V
	155	163	517.7856	1033.5567	1033.5556	1.04	0	47		0.03	1	U	R.NILDGTVFR.E
	155	163	517.7858	1033.5571	1033.5556	1.41	0	48		0.021	1	U	R.NILDGTVFR.E
	226	241	854.4249	1706.8353	1706.8298	3.25	0	82		7.4e-06	1	U	K.GPGVALAMYNVDESIR.A + Oxidation (M)
	226	241	854.4260	1706.8374	1706.8298	4.46	0	88		1.6e-06	1	U	K.GPGVALAMYNVDESIR.A + Oxidation (M)
	226	241	854.4313	1706.8480	1706.8298	10.7	0	72		7.7e-05	1	U	K.GPGVALAMYNVDESIR.A + Oxidation (M)
	353	365	686.3473	1370.6800	1370.6790	0.75	0	72		6.9e-05	1	U	K.TLESEAAHGTVTR.H
	353	365	457.9006	1370.6801	1370.6790	0.77	0	64		0.00048	1	U	K.TLESEAAHGTVTR.H
	353	365	457.9007	1370.6802	1370.6790	0.86	0	63		0.00062	1	U	K.TLESEAAHGTVTR.H
	353	365	686.3474	1370.6803	1370.6790	0.92	0	77		2.4e-05	1	U	K.TLESEAAHGTVTR.H
	410	422	712.3416	1422.6687	1422.6661	1.83	0	76		2.4e-05	1	U	K.LESSCVNTVETGK.M
19	43	55	792.4058	1582.7971	1582.7951	1.27	0	75	42	3.5e-05	1		K.SQLQELIPEQQDR.L	8
	43	55	792.4059	1582.7973	1582.7951	1.42	0	50		0.011	1		K.SQLQELIPEQQDR.L
	43	55	792.4059	1582.7973	1582.7951	1.42	0	70		0.00011	1		K.SQLQELIPEQQDR.L
	43	55	792.4060	1582.7975	1582.7951	1.51	0	70		0.00011	1		K.SQLQELIPEQQDR.L
	43	55	792.4061	1582.7976	1582.7951	1.59	0	70		0.00011	1		K.SQLQELIPEQQDR.L
	66	81	867.9432	1733.8718	1733.8804	-4.98	0	71		9.8e-05	1	U	K.VQLGNITVDMVIGGMR.G + 2 Oxidation (M)
	66	81	867.9472	1733.8798	1733.8804	-0.35	0	60		0.0013	1	U	K.VQLGNITVDMVIGGMR.G + 2 Oxidation (M)
	66	81	867.9475	1733.8805	1733.8804	0.012	0	48		0.021	1	U	K.VQLGNITVDMVIGGMR.G + 2 Oxidation (M)
	66	81	867.9476	1733.8807	1733.8804	0.15	0	62		0.00085	1	U	K.VQLGNITVDMVIGGMR.G + 2 Oxidation (M)
	66	81	867.9481	1733.8817	1733.8804	0.72	0	83		6.6e-06	1	U	K.VQLGNITVDMVIGGMR.G + 2 Oxidation (M)
	66	81	867.9487	1733.8828	1733.8804	1.35	0	80		1.3e-05	1	U	K.VQLGNITVDMVIGGMR.G + 2 Oxidation (M)
	66	81	867.9501	1733.8856	1733.8804	2.97	0	70		0.00011	1	U	K.VQLGNITVDMVIGGMR.G + 2 Oxidation (M)
	66	81	867.9511	1733.8877	1733.8804	4.16	0	69		0.00016	1	U	K.VQLGNITVDMVIGGMR.G + 2 Oxidation (M)
	192	199	466.2362	930.4579	930.4559	2.11	0	49		0.015	1	U	K.AYENGIHK.S
	192	199	466.2364	930.4583	930.4559	2.56	0	47		0.026	1	U	K.AYENGIHK.S
	217	226	568.8264	1135.6381	1135.6390	-0.73	0	48		0.016	1	U	R.VPVVAAYVYR.R
	217	226	568.8265	1135.6384	1135.6390	-0.50	0	57		0.0021	1	U	R.VPVVAAYVYR.R
	217	226	568.8268	1135.6390	1135.6390	0.027	0	64		0.00035	1	U	R.VPVVAAYVYR.R
	217	226	568.8268	1135.6390	1135.6390	0.027	0	60		0.001	1	U	R.VPVVAAYVYR.R
	217	226	568.8268	1135.6390	1135.6390	0.027	0	51		0.0077	1	U	R.VPVVAAYVYR.R
	217	226	568.8268	1135.6391	1135.6390	0.13	0	48		0.015	1	U	R.VPVVAAYVYR.R
	217	226	568.8270	1135.6395	1135.6390	0.47	0	48		0.015	1	U	R.VPVVAAYVYR.R
	217	226	568.8271	1135.6396	1135.6390	0.57	0	48		0.016	1	U	R.VPVVAAYVYR.R
	217	226	568.8271	1135.6396	1135.6390	0.57	0	52		0.0057	1	U	R.VPVVAAYVYR.R
	217	226	568.8271	1135.6396	1135.6390	0.57	0	52		0.0068	1	U	R.VPVVAAYVYR.R
	217	226	568.8272	1135.6399	1135.6390	0.78	0	60		0.00093	1	U	R.VPVVAAYVYR.R
	217	226	568.8274	1135.6402	1135.6390	1.10	0	60		0.00099	1	U	R.VPVVAAYVYR.R
	231	239	466.7220	931.4295	931.4247	5.16	0	42		0.048	1	U	K.NGDSIPSDK.S
	231	239	466.7220	931.4295	931.4247	5.16	0	42		0.048	1	U	K.NGDSIPSDK.S
	231	239	466.7221	931.4296	931.4247	5.29	0	46		0.022	1	U	K.NGDSIPSDK.S
	321	332	676.3070	1350.5993	1350.5973	1.51	0	53		0.0038	1	U	K.SVVEECGEDISK.E
	321	332	676.3074	1350.6002	1350.5973	2.13	0	63		0.00036	1	U	K.SVVEECGEDISK.E
	321	332	676.3075	1350.6004	1350.5973	2.33	0	57		0.0013	1	U	K.SVVEECGEDISK.E
	426	435	602.8228	1203.6309	1203.6288	1.77	0	48		0.024	1		R.YYTVLFGVSR.S
	448	457	534.3324	1066.6502	1066.6498	0.38	0	48		0.0044	1	U	R.ALGLALERPK.S
	448	457	534.3325	1066.6504	1066.6498	0.49	0	50		0.0025	1	U	R.ALGLALERPK.S
	448	457	534.3326	1066.6507	1066.6498	0.83	0	50		0.0026	1	U	R.ALGLALERPK.S
	448	457	534.3330	1066.6515	1066.6498	1.53	0	52		0.0018	1	U	R.ALGLALERPK.S
	448	457	534.3331	1066.6516	1066.6498	1.64	0	40		0.025	1	U	R.ALGLALERPK.S
	448	457	534.3332	1066.6518	1066.6498	1.86	0	55		0.00088	1	U	R.ALGLALERPK.S
20	43	55	792.4049	1582.7953	1582.7951	0.12	0	52	42	0.0075	1		K.SQLQELIPEQQDR.L	9
	43	55	792.4052	1582.7957	1582.7951	0.43	0	52		0.0084	1		K.SQLQELIPEQQDR.L
	43	55	792.4056	1582.7966	1582.7951	0.97	0	61		0.00099	1		K.SQLQELIPEQQDR.L
	43	55	528.6063	1582.7970	1582.7951	1.19	0	50		0.012	1		K.SQLQELIPEQQDR.L
	43	55	792.4058	1582.7970	1582.7951	1.20	0	70		0.00012	1		K.SQLQELIPEQQDR.L
	43	55	792.4058	1582.7971	1582.7951	1.27	0	70		0.00011	1		K.SQLQELIPEQQDR.L
	43	55	792.4059	1582.7972	1582.7951	1.35	0	70		0.00012	1		K.SQLQELIPEQQDR.L
	43	55	528.6064	1582.7973	1582.7951	1.41	0	50		0.013	1		K.SQLQELIPEQQDR.L
	43	55	792.4061	1582.7977	1582.7951	1.66	0	70		0.00012	1		K.SQLQELIPEQQDR.L
	43	55	792.4062	1582.7978	1582.7951	1.74	0	52		0.0082	1		K.SQLQELIPEQQDR.L
	43	55	792.4063	1582.7981	1582.7951	1.89	0	78		2.1e-05	1		K.SQLQELIPEQQDR.L
	43	55	792.4063	1582.7981	1582.7951	1.89	0	70		0.00011	1		K.SQLQELIPEQQDR.L
	66	81	867.9454	1733.8763	1733.8804	-2.39	0	45		0.04	1	U	K.VQLGNITVDMVIGGMR.G + 2 Oxidation (M)
	66	81	867.9469	1733.8792	1733.8804	-0.69	0	65		0.00036	1	U	K.VQLGNITVDMVIGGMR.G + 2 Oxidation (M)
	66	81	867.9473	1733.8800	1733.8804	-0.26	0	64		0.00053	1	U	K.VQLGNITVDMVIGGMR.G + 2 Oxidation (M)
	66	81	867.9473	1733.8801	1733.8804	-0.20	0	69		0.00016	1	U	K.VQLGNITVDMVIGGMR.G + 2 Oxidation (M)
	66	81	867.9476	1733.8807	1733.8804	0.15	0	80		1.3e-05	1	U	K.VQLGNITVDMVIGGMR.G + 2 Oxidation (M)
	66	81	867.9476	1733.8807	1733.8804	0.15	0	80		1.3e-05	1	U	K.VQLGNITVDMVIGGMR.G + 2 Oxidation (M)
	66	81	867.9477	1733.8808	1733.8804	0.22	0	79		1.7e-05	1	U	K.VQLGNITVDMVIGGMR.G + 2 Oxidation (M)
	66	81	867.9479	1733.8812	1733.8804	0.44	0	54		0.0044	1	U	K.VQLGNITVDMVIGGMR.G + 2 Oxidation (M)
	66	81	867.9479	1733.8813	1733.8804	0.51	0	61		0.00095	1	U	K.VQLGNITVDMVIGGMR.G + 2 Oxidation (M)
	66	81	867.9482	1733.8819	1733.8804	0.85	0	88		1.8e-06	1	U	K.VQLGNITVDMVIGGMR.G + 2 Oxidation (M)
	66	81	867.9482	1733.8819	1733.8804	0.85	0	71		8.8e-05	1	U	K.VQLGNITVDMVIGGMR.G + 2 Oxidation (M)
	66	81	867.9485	1733.8824	1733.8804	1.14	0	67		0.00023	1	U	K.VQLGNITVDMVIGGMR.G + 2 Oxidation (M)
	66	81	867.9492	1733.8838	1733.8804	1.92	0	79		1.4e-05	1	U	K.VQLGNITVDMVIGGMR.G + 2 Oxidation (M)
	66	81	867.9510	1733.8874	1733.8804	4.03	0	62		0.00072	1	U	K.VQLGNITVDMVIGGMR.G + 2 Oxidation (M)
	66	81	867.9543	1733.8940	1733.8804	7.82	0	68		0.00019	1	U	K.VQLGNITVDMVIGGMR.G + 2 Oxidation (M)
	140	147	452.2434	902.4721	902.4709	1.40	0	47		0.039	1	U	K.EQVEALSK.D
	217	226	568.8253	1135.6360	1135.6390	-2.65	0	45		0.03	1	U	R.VPVVAAYVYR.R
	217	226	568.8260	1135.6374	1135.6390	-1.36	0	64		0.00035	1	U	R.VPVVAAYVYR.R
	217	226	568.8264	1135.6381	1135.6390	-0.73	0	47		0.018	1	U	R.VPVVAAYVYR.R
	217	226	568.8267	1135.6388	1135.6390	-0.18	0	49		0.011	1	U	R.VPVVAAYVYR.R
	217	226	568.8267	1135.6389	1135.6390	-0.078	0	50		0.011	1	U	R.VPVVAAYVYR.R
	217	226	568.8268	1135.6391	1135.6390	0.13	0	46		0.024	1	U	R.VPVVAAYVYR.R
	217	226	568.8268	1135.6391	1135.6390	0.13	0	60		0.00098	1	U	R.VPVVAAYVYR.R
	217	226	568.8268	1135.6391	1135.6390	0.13	0	60		0.00098	1	U	R.VPVVAAYVYR.R
	217	226	568.8269	1135.6392	1135.6390	0.24	0	48		0.015	1	U	R.VPVVAAYVYR.R
	217	226	568.8269	1135.6392	1135.6390	0.24	0	60		0.00088	1	U	R.VPVVAAYVYR.R
	217	226	568.8270	1135.6394	1135.6390	0.36	0	60		0.001	1	U	R.VPVVAAYVYR.R
	217	226	568.8270	1135.6394	1135.6390	0.36	0	60		0.00086	1	U	R.VPVVAAYVYR.R
	217	226	568.8270	1135.6394	1135.6390	0.36	0	64		0.00035	1	U	R.VPVVAAYVYR.R
	217	226	568.8270	1135.6394	1135.6390	0.36	0	54		0.0041	1	U	R.VPVVAAYVYR.R
	217	226	568.8270	1135.6394	1135.6390	0.36	0	54		0.0035	1	U	R.VPVVAAYVYR.R
	217	226	568.8270	1135.6395	1135.6390	0.47	0	52		0.0062	1	U	R.VPVVAAYVYR.R
	217	226	568.8271	1135.6397	1135.6390	0.68	0	48		0.015	1	U	R.VPVVAAYVYR.R
	217	226	568.8271	1135.6397	1135.6390	0.68	0	52		0.0061	1	U	R.VPVVAAYVYR.R
	217	226	568.8273	1135.6401	1135.6390	1.00	0	52		0.0057	1	U	R.VPVVAAYVYR.R
	217	226	568.8274	1135.6402	1135.6390	1.10	0	48		0.015	1	U	R.VPVVAAYVYR.R
	217	226	568.8274	1135.6403	1135.6390	1.21	0	60		0.00098	1	U	R.VPVVAAYVYR.R
	217	226	568.8287	1135.6429	1135.6390	3.48	0	49		0.012	1	U	R.VPVVAAYVYR.R
	231	239	466.7196	931.4247	931.4247	0.048	0	64		0.00035	1	U	K.NGDSIPSDK.S
	231	239	466.7201	931.4257	931.4247	1.14	0	57		0.0015	1	U	K.NGDSIPSDK.S
	231	239	466.7203	931.4259	931.4247	1.36	0	55		0.0028	1	U	K.NGDSIPSDK.S
	231	239	466.7204	931.4263	931.4247	1.74	0	57		0.0015	1	U	K.NGDSIPSDK.S
	231	239	466.7208	931.4270	931.4247	2.52	0	67		0.00018	1	U	K.NGDSIPSDK.S
	231	239	466.7212	931.4278	931.4247	3.38	0	72		4.9e-05	1	U	K.NGDSIPSDK.S
	231	239	466.7213	931.4281	931.4247	3.70	0	72		5e-05	1	U	K.NGDSIPSDK.S
	231	239	466.7214	931.4282	931.4247	3.76	0	66		0.0002	1	U	K.NGDSIPSDK.S
	231	239	466.7218	931.4290	931.4247	4.69	0	66		0.00023	1	U	K.NGDSIPSDK.S
	321	332	676.3070	1350.5993	1350.5973	1.51	0	56		0.0016	1	U	K.SVVEECGEDISK.E
	321	332	676.3074	1350.6003	1350.5973	2.22	0	58		0.0012	1	U	K.SVVEECGEDISK.E
	321	332	676.3076	1350.6007	1350.5973	2.50	0	67		0.00013	1	U	K.SVVEECGEDISK.E
	321	332	676.3077	1350.6009	1350.5973	2.68	0	55		0.0021	1	U	K.SVVEECGEDISK.E
	387	400	519.6363	1555.8872	1555.8861	0.70	0	51		0.0048	1		K.LYEVVPPVLTELGK.V
	426	435	602.8197	1203.6248	1203.6288	-3.30	0	47		0.028	1		R.YYTVLFGVSR.S
	426	435	602.8204	1203.6263	1203.6288	-2.08	0	52		0.0093	1		R.YYTVLFGVSR.S
	426	435	602.8208	1203.6270	1203.6288	-1.47	0	46		0.035	1		R.YYTVLFGVSR.S
	426	435	602.8209	1203.6273	1203.6288	-1.27	0	49		0.018	1		R.YYTVLFGVSR.S
	426	435	602.8211	1203.6277	1203.6288	-0.95	0	50		0.016	1		R.YYTVLFGVSR.S
	426	435	602.8213	1203.6280	1203.6288	-0.65	0	46		0.041	1		R.YYTVLFGVSR.S
	426	435	602.8215	1203.6285	1203.6288	-0.26	0	49		0.018	1		R.YYTVLFGVSR.S
	426	435	602.8216	1203.6286	1203.6288	-0.16	0	48		0.026	1		R.YYTVLFGVSR.S
	426	435	602.8221	1203.6296	1203.6288	0.66	0	50		0.017	1		R.YYTVLFGVSR.S
	426	435	602.8221	1203.6296	1203.6288	0.66	0	49		0.017	1		R.YYTVLFGVSR.S
	426	435	602.8221	1203.6297	1203.6288	0.76	0	49		0.02	1		R.YYTVLFGVSR.S
	448	457	534.3328	1066.6510	1066.6498	1.06	0	47		0.0052	1		R.ALGLALERPK.S
	448	457	534.3328	1066.6511	1066.6498	1.17	0	38		0.043	1		R.ALGLALERPK.S
	448	457	534.3332	1066.6518	1066.6498	1.86	0	52		0.0019	1		R.ALGLALERPK.S
	448	457	534.3335	1066.6524	1066.6498	2.44	0	56		0.00061	1		R.ALGLALERPK.S
	448	457	534.3336	1066.6527	1066.6498	2.67	0	50		0.0026	1		R.ALGLALERPK.S
	448	457	534.3346	1066.6546	1066.6498	4.49	0	56		0.00067	1		R.ALGLALERPK.S
	448	457	534.3348	1066.6550	1066.6498	4.84	0	51		0.002	1		R.ALGLALERPK.S
	448	457	534.3352	1066.6559	1066.6498	5.65	0	55		0.00097	1		R.ALGLALERPK.S
	448	457	534.3355	1066.6563	1066.6498	6.10	0	44		0.0076	1		R.ALGLALERPK.S
21	12	16	314.7103	627.4060	627.4068	-1.17	0	44	42	0.023	1	U	R.ILVQR.V	3
	12	16	314.7108	627.4070	627.4068	0.36	0	44		0.021	1	U	R.ILVQR.V
	23	32	543.8055	1085.5965	1085.5968	-0.27	0	53		0.0065	1	U	K.TESGILLPEK.S
	23	32	543.8056	1085.5966	1085.5968	-0.16	0	59		0.0018	1	U	K.TESGILLPEK.S
	23	32	543.8057	1085.5969	1085.5968	0.084	0	62		0.00079	1	U	K.TESGILLPEK.S
	23	32	543.8060	1085.5974	1085.5968	0.53	0	44		0.048	1	U	K.TESGILLPEK.S
	62	77	853.4376	1704.8607	1704.8570	2.14	0	45		0.039	1	U	K.EGDTVLLPEYGGTQVK.L
	62	77	853.4423	1704.8701	1704.8570	7.65	0	47		0.025	1	U	K.EGDTVLLPEYGGTQVK.L
22	27	34	451.7493	901.4840	901.4869	-3.16	0	58	42	0.0029	1	U	K.VLVTDEAR.R	5
	27	34	451.7498	901.4850	901.4869	-2.14	0	55		0.006	1	U	K.VLVTDEAR.R
	27	34	451.7498	901.4851	901.4869	-1.94	0	57		0.0038	1	U	K.VLVTDEAR.R
	27	34	451.7499	901.4852	901.4869	-1.87	0	56		0.0045	1	U	K.VLVTDEAR.R
	27	34	451.7500	901.4854	901.4869	-1.67	0	56		0.0043	1	U	K.VLVTDEAR.R
	27	34	451.7501	901.4856	901.4869	-1.40	0	55		0.0058	1	U	K.VLVTDEAR.R
	27	34	451.7502	901.4859	901.4869	-1.14	0	54		0.008	1	U	K.VLVTDEAR.R
	27	34	451.7502	901.4859	901.4869	-1.14	0	56		0.0043	1	U	K.VLVTDEAR.R
	27	34	451.7503	901.4861	901.4869	-0.85	0	56		0.0043	1	U	K.VLVTDEAR.R
	27	34	451.7506	901.4867	901.4869	-0.18	0	55		0.0052	1	U	K.VLVTDEAR.R
	27	34	451.7511	901.4877	901.4869	0.90	0	59		0.0027	1	U	K.VLVTDEAR.R
	43	54	697.3506	1392.6867	1392.6885	-1.26	0	56		0.0037	1	U	R.AFDEVNTQLQTK.F
	43	54	697.3516	1392.6887	1392.6885	0.13	0	61		0.0014	1	U	R.AFDEVNTQLQTK.F
	43	54	697.3516	1392.6887	1392.6885	0.13	0	70		0.00016	1	U	R.AFDEVNTQLQTK.F
	43	54	697.3519	1392.6893	1392.6885	0.58	0	70		0.00016	1	U	R.AFDEVNTQLQTK.F
	43	54	697.3520	1392.6894	1392.6885	0.66	0	70		0.00016	1	U	R.AFDEVNTQLQTK.F
	43	54	697.3528	1392.6910	1392.6885	1.80	0	55		0.0048	1	U	R.AFDEVNTQLQTK.F
	43	54	697.3537	1392.6928	1392.6885	3.12	0	46		0.045	1	U	R.AFDEVNTQLQTK.F
	103	111	524.3074	1046.6003	1046.6012	-0.83	0	52		0.0073	1		K.FDALLVELK.E
	103	111	524.3080	1046.6014	1046.6012	0.22	0	50		0.013	1		K.FDALLVELK.E
	103	111	524.3084	1046.6023	1046.6012	1.04	0	48		0.02	1		K.FDALLVELK.E
	103	111	524.3086	1046.6026	1046.6012	1.38	0	53		0.0056	1		K.FDALLVELK.E
	103	111	524.3086	1046.6027	1046.6012	1.50	0	63		0.00063	1		K.FDALLVELK.E
	103	111	524.3087	1046.6029	1046.6012	1.63	0	53		0.0059	1		K.FDALLVELK.E
	103	111	524.3087	1046.6029	1046.6012	1.63	0	63		0.00053	1		K.FDALLVELK.E
	103	111	524.3091	1046.6036	1046.6012	2.32	0	54		0.0043	1		K.FDALLVELK.E
	103	111	524.3091	1046.6037	1046.6012	2.43	0	59		0.0016	1		K.FDALLVELK.E
	103	111	524.3097	1046.6048	1046.6012	3.48	0	49		0.015	1		K.FDALLVELK.E
	103	111	524.3106	1046.6067	1046.6012	5.24	0	44		0.05	1		K.FDALLVELK.E
	137	149	789.8688	1577.7230	1577.7283	-3.37	1	80		7.4e-06	1		K.KLSTMTADEYFEK.H + Oxidation (M)
	137	149	789.8696	1577.7247	1577.7283	-2.28	1	54		0.0037	1		K.KLSTMTADEYFEK.H + Oxidation (M)
	137	149	789.8709	1577.7271	1577.7283	-0.73	1	113		3.9e-09	1		K.KLSTMTADEYFEK.H + Oxidation (M)
	137	149	526.9170	1577.7291	1577.7283	0.53	1	57		0.0019	1		K.KLSTMTADEYFEK.H + Oxidation (M)
	138	149	725.8239	1449.6333	1449.6333	-0.054	0	75		2.7e-05	1		K.LSTMTADEYFEK.H + Oxidation (M)
	138	149	725.8239	1449.6333	1449.6333	-0.054	0	82		5.4e-06	1		K.LSTMTADEYFEK.H + Oxidation (M)
	138	149	725.8243	1449.6340	1449.6333	0.46	0	73		3.6e-05	1		K.LSTMTADEYFEK.H + Oxidation (M)
	138	149	725.8245	1449.6344	1449.6333	0.70	0	71		6.1e-05	1		K.LSTMTADEYFEK.H + Oxidation (M)
	138	149	725.8246	1449.6346	1449.6333	0.87	0	71		6.2e-05	1		K.LSTMTADEYFEK.H + Oxidation (M)
	138	149	725.8254	1449.6363	1449.6333	2.06	0	58		0.0014	1		K.LSTMTADEYFEK.H + Oxidation (M)
