# Supplementary material for: Cold and Heat Stress Diversely Alters Both Cauliflower Respiration and Distinct Mitochondrial Proteins Including OXPHOS Components and Matrix Enzymes
Source: Preprints.org preprint supplement (doi:10.20944/preprints201801.0280.v1), 2018-01-30
Supplement: Supplementary file 4 [file Table S3ab.xls]

## Sheet: Table S3a
Spot no.	gi. no.	Start a	End a	Observed b	Mr(expt) c	Mr(calc) d	ppm e	M f	Score g	Rank h	U i	Peptide j
8	gi|15235282	55	69	496.2740	1485.8001	1485.8039	-2.52	0	40	1	U	C.STGDGSKPTILVAEK.L + [-15.9949 at N-term S]
		55	69	743.9075	1485.8004	1485.8039	-2.35	0	84	1	U	C.STGDGSKPTILVAEK.L + [-15.9949 at N-term S]
		55	69	496.2744	1485.8012	1485.8039	-1.79	0	38	1	U	C.STGDGSKPTILVAEK.L + [-15.9949 at N-term S]
		55	69	743.9080	1485.8014	1485.8039	-1.69	0	90	1	U	C.STGDGSKPTILVAEK.L + [-15.9949 at N-term S]
		55	69	496.2746	1485.8019	1485.8039	-1.34	0	46	1	U	C.STGDGSKPTILVAEK.L + [-15.9949 at N-term S]
		55	69	743.9087	1485.8028	1485.8039	-0.71	0	64	1	U	C.STGDGSKPTILVAEK.L + [-15.9949 at N-term S]
		55	69	779.4123	1556.8101	1556.8522	-27.0	0	87	1	U	C.STGDGSKPTILVAEK.L + [+55.0534 at T2]
		55	69	787.4235	1572.8325	1572.8359	-2.17	0	34	1	U	C.STGDGSKPTILVAEK.L + Carbamidomethyl (K); [+14.0157 at T2]
		55	69	787.4242	1572.8338	1572.8359	-1.32	0	29	1	U	C.STGDGSKPTILVAEK.L + Carbamidomethyl (K); [+14.0157 at N-term S]
		55	69	525.2852	1572.8338	1572.8359	-1.32	0	28	1	U	C.STGDGSKPTILVAEK.L + Carbamidomethyl (K); [+14.0157 at T2]
		55	69	787.4243	1572.8341	1572.8359	-1.16	0	29	1	U	C.STGDGSKPTILVAEK.L + Carbamidomethyl (K); [+14.0157 at S6]
		55	69	787.4244	1572.8343	1572.8359	-1.00	0	30	1	U	C.STGDGSKPTILVAEK.L + Carbamidomethyl (K); [+14.0157 at D4]
		55	69	787.4245	1572.8344	1572.8359	-0.93	0	34	1	U	C.STGDGSKPTILVAEK.L + Carbamidomethyl (K); [+14.0157 at N-term S]
		55	69	794.4320	1586.8493	1586.8516	-1.40	0	30	1	U	C.STGDGSKPTILVAEK.L + Carbamidomethyl (K); 2 [+14.0157 at D4,E14]
		55	69	794.4327	1586.8508	1586.8516	-0.48	0	29	1	U	C.STGDGSKPTILVAEK.L + Carbamidomethyl (K); 2 [+14.0157 at D4,E14]
		55	69	538.9417	1613.8033	1613.8215	-11.3	0	34	1	U	C.STGDGSKPTILVAEK.L + Phospho (ST); [+32.0564 at N-term]
		55	69	541.2734	1620.7985	1620.8359	-23.1	0	36	1	U	C.STGDGSKPTILVAEK.L + [+119.0371 at N-term]
		55	69	811.4068	1620.7990	1620.8359	-22.7	0	61	1	U	C.STGDGSKPTILVAEK.L + [+119.0371 at N-term]
		55	69	811.4069	1620.7992	1620.8359	-22.7	0	72	1	U	C.STGDGSKPTILVAEK.L + [+119.0371 at N-term]
		55	69	811.4078	1620.8010	1620.8359	-21.5	0	70	1	U	C.STGDGSKPTILVAEK.L + [+119.0371 at N-term]
		55	69	811.4080	1620.8015	1620.8359	-21.2	0	72	1	U	C.STGDGSKPTILVAEK.L + [+119.0371 at N-term]
		55	69	819.4047	1636.7948	1636.8185	-14.5	0	82	1	U	C.STGDGSKPTILVAEK.L + Phospho (ST); [+55.0534 at T2]
		55	69	819.4047	1636.7948	1636.8185	-14.5	0	71	1	U	C.STGDGSKPTILVAEK.L + Phospho (ST); [+55.0534 at T2]
		55	69	819.4051	1636.7956	1636.8185	-14.0	0	65	1	U	C.STGDGSKPTILVAEK.L + Phospho (ST); [+55.0534 at T2]
		55	69	819.4053	1636.7960	1636.8185	-13.8	0	82	1	U	C.STGDGSKPTILVAEK.L + Phospho (ST); [+55.0534 at T2]
		55	69	819.4055	1636.7964	1636.8185	-13.5	0	78	1	U	C.STGDGSKPTILVAEK.L + Phospho (ST); [+55.0534 at T2]
		55	69	819.4055	1636.7965	1636.8185	-13.5	0	82	1	U	C.STGDGSKPTILVAEK.L + Phospho (ST); [+55.0534 at T2]
		55	69	819.4056	1636.7966	1636.8185	-13.4	0	78	1	U	C.STGDGSKPTILVAEK.L + Phospho (ST); [+55.0534 at T2]
		55	69	827.3938	1652.7730	1652.8022	-17.7	0	45	1	U	C.STGDGSKPTILVAEK.L + Phospho (ST); Carbamidomethyl (K); [+14.0157 at G3]
		55	69	827.3939	1652.7733	1652.8022	-17.5	0	51	1	U	C.STGDGSKPTILVAEK.L + Phospho (ST); Carbamidomethyl (K); [+14.0157 at G3]
		55	69	827.3942	1652.7738	1652.8022	-17.2	0	51	1	U	C.STGDGSKPTILVAEK.L + Phospho (ST); Carbamidomethyl (K); [+14.0157 at G3]
		55	69	827.3945	1652.7744	1652.8022	-16.8	0	51	1	U	C.STGDGSKPTILVAEK.L + Phospho (ST); Carbamidomethyl (K); [+14.0157 at G3]
		55	69	830.3962	1658.7778	1658.8363	-35.3	0	31	1	U	C.STGDGSKPTILVAEK.L + Carbamidomethyl (K); [+100.0160 at N-term]
		55	69	554.2668	1659.7787	1659.7522	16.0	0	55	1	U	C.STGDGSKPTILVAEK.L + Phospho (ST); [+77.9871 at T2]
		55	69	834.4004	1666.7863	1666.8179	-18.9	0	35	1	U	C.STGDGSKPTILVAEK.L + Phospho (ST); Carbamidomethyl (K); 2 [+14.0157 at D4,E14]
		55	69	834.4011	1666.7877	1666.8179	-18.1	0	35	1	U	C.STGDGSKPTILVAEK.L + Phospho (ST); Carbamidomethyl (K); 2 [+14.0157 at D4,E14]
		55	69	834.4016	1666.7887	1666.8179	-17.5	0	30	1	U	C.STGDGSKPTILVAEK.L + Phospho (ST); Carbamidomethyl (K); 2 [+14.0157 at D4,E14]
		55	69	838.3790	1674.7434	1674.7631	-11.8	0	31	1	U	C.STGDGSKPTILVAEK.L + 2 Phospho (ST); Carbamidomethyl (K); [-43.9898 at D4]
		56	69	693.3843	1384.7540	1384.7562	-1.59	0	50	1	U	S.TGDGSKPTILVAEK.L + [-30.0106 at N-term T]
		56	69	756.8984	1511.7823	1511.7676	9.77	0	63	1	U	S.TGDGSKPTILVAEK.L + Phospho (ST); [+17.0345 at D3]
		56	69	764.9130	1527.8114	1527.8144	-2.01	0	58	1	U	S.TGDGSKPTILVAEK.L + Carbamidomethyl (K); [+56.0262 at N-term]
		56	69	778.9109	1555.8072	1555.8651	-37.2	0	100	1	U	S.TGDGSKPTILVAEK.L + [+141.0983 at N-term]
		56	69	778.9112	1555.8078	1555.8651	-36.8	0	83	1	U	S.TGDGSKPTILVAEK.L + [+141.0983 at N-term]
		56	69	778.9113	1555.8081	1555.8651	-36.6	0	74	1	U	S.TGDGSKPTILVAEK.L + [+141.0983 at N-term]
		56	69	778.9114	1555.8082	1555.8651	-36.5	0	102	1	U	S.TGDGSKPTILVAEK.L + [+141.0983 at N-term]
		56	69	778.9122	1555.8098	1555.8651	-35.5	0	104	1	U	S.TGDGSKPTILVAEK.L + [+141.0983 at N-term]
		56	69	778.9122	1555.8098	1555.8651	-35.5	0	104	1	U	S.TGDGSKPTILVAEK.L + [+141.0983 at N-term]
		56	69	778.9122	1555.8098	1555.8651	-35.5	0	97	1	U	S.TGDGSKPTILVAEK.L + [+141.0983 at N-term]
		57	69	787.9183	1573.8220	1573.8199	1.32	0	34	1	U	T.GDGSKPTILVAEK.L + Carbamidomethyl (K); [+203.0794 at S4]
		59	69	381.5635	1141.6687	1141.6343	30.2	0	53	1	U	D.GSKPTILVAEK.L + [-0.0364 at C-term K]
		59	69	586.8461	1171.6777	1171.6812	-2.99	0	29	1	U	D.GSKPTILVAEK.L + [+30.0106 at N-term G]
		59	69	615.3569	1228.6992	1228.7391	-32.5	0	51	1	U	D.GSKPTILVAEK.L + [+87.0684 at K3]
		61	69	543.3300	1084.6455	1084.6856	-37.0	0	39	1	U	S.KPTILVAEK.L + [+87.0684 at N-term K]
		61	69	543.3301	1084.6457	1084.6856	-36.7	0	38	1	U	S.KPTILVAEK.L + [+87.0684 at N-term K]
		62	69	435.7668	869.5191	869.4858	38.3	0	61	1	U	K.PTILVAEK.L + [-0.0364 at C-term K]
		62	69	435.7671	869.5196	869.4858	38.8	0	58	1	U	K.PTILVAEK.L + [-0.0364 at C-term K]
		62	69	435.7675	869.5204	869.4858	39.8	0	58	1	U	K.PTILVAEK.L + [-0.0364 at C-term K]
		62	69	435.7675	869.5205	869.4858	39.9	0	50	1	U	K.PTILVAEK.L + [-0.0364 at C-term K]
		62	69	435.7676	869.5206	869.4858	40.0	0	61	1	U	K.PTILVAEK.L + [-0.0364 at C-term K]
		62	69	435.7677	869.5209	869.5222	-1.49	0	46	1	U	K.PTILVAEK.L
		62	69	435.7679	869.5213	869.5222	-1.01	0	27	1	U	K.PTILVAEK.L
		62	69	435.7681	869.5216	869.5222	-0.64	0	46	1	U	K.PTILVAEK.L
		62	69	435.7681	869.5216	869.5222	-0.64	0	50	1	U	K.PTILVAEK.L
		62	69	435.7682	869.5218	869.5222	-0.43	0	61	1	U	K.PTILVAEK.L
		62	69	435.7683	869.5220	869.5222	-0.22	0	47	1	U	K.PTILVAEK.L
		62	69	435.7685	869.5225	869.5222	0.33	0	45	1	U	K.PTILVAEK.L
		62	69	435.7695	869.5245	869.5222	2.65	0	41	1	U	K.PTILVAEK.L
		62	69	435.7699	869.5252	869.5222	3.43	0	43	1	U	K.PTILVAEK.L
		62	69	435.7701	869.5257	869.5222	3.99	0	57	1	U	K.PTILVAEK.L
		62	69	435.7703	869.5260	869.5222	4.33	0	27	1	U	K.PTILVAEK.L
		62	69	435.7705	869.5264	869.5222	4.84	0	53	1	U	K.PTILVAEK.L
		62	69	442.7754	883.5362	883.5379	-1.91	0	46	1	U	K.PTILVAEK.L + [+14.0157 at E7]
		62	69	442.7757	883.5369	883.5379	-1.07	0	56	1	U	K.PTILVAEK.L + [+14.0157 at E7]
		62	69	442.7760	883.5374	883.5379	-0.46	0	56	1	U	K.PTILVAEK.L + [+14.0157 at E7]
		63	69	441.7675	881.5204	881.5160	4.95	0	40	1	U	P.TILVAEK.L + [+109.0466 at N-term]
		99	108	580.3264	1158.6383	1158.6431	-4.12	0	56	1	U	K.ISLCDALIVR.S
		99	108	580.3265	1158.6384	1158.6431	-4.02	0	78	1	U	K.ISLCDALIVR.S
		99	108	580.3265	1158.6384	1158.6431	-4.02	0	41	1	U	K.ISLCDALIVR.S
		99	108	580.3267	1158.6389	1158.6431	-3.61	0	43	1	U	K.ISLCDALIVR.S
		99	108	580.3268	1158.6390	1158.6431	-3.50	0	64	1	U	K.ISLCDALIVR.S
		99	108	580.3268	1158.6391	1158.6431	-3.40	0	56	1	U	K.ISLCDALIVR.S
		99	108	580.3271	1158.6396	1158.6431	-2.97	0	83	1	U	K.ISLCDALIVR.S
		99	108	580.3271	1158.6396	1158.6431	-2.97	0	82	1	U	K.ISLCDALIVR.S
		99	108	580.3271	1158.6396	1158.6431	-2.97	0	51	1	U	K.ISLCDALIVR.S
		99	108	580.3271	1158.6397	1158.6431	-2.86	0	82	1	U	K.ISLCDALIVR.S
		99	108	580.3272	1158.6399	1158.6431	-2.76	0	83	1	U	K.ISLCDALIVR.S
		99	108	580.3273	1158.6400	1158.6431	-2.66	0	52	1	U	K.ISLCDALIVR.S
		99	108	580.3273	1158.6401	1158.6431	-2.55	0	71	1	U	K.ISLCDALIVR.S
		99	108	580.3275	1158.6405	1158.6431	-2.24	0	61	1	U	K.ISLCDALIVR.S
		99	108	580.3275	1158.6405	1158.6431	-2.24	0	77	1	U	K.ISLCDALIVR.S
		99	108	580.3275	1158.6405	1158.6431	-2.24	0	82	1	U	K.ISLCDALIVR.S
		99	108	580.3276	1158.6407	1158.6431	-2.02	0	59	1	U	K.ISLCDALIVR.S
		99	108	580.3276	1158.6407	1158.6431	-2.02	0	42	1	U	K.ISLCDALIVR.S
		99	108	580.3278	1158.6410	1158.6431	-1.81	0	77	1	U	K.ISLCDALIVR.S
		99	108	580.3278	1158.6410	1158.6431	-1.81	0	68	1	U	K.ISLCDALIVR.S
		99	108	580.3278	1158.6411	1158.6431	-1.71	0	64	1	U	K.ISLCDALIVR.S
		99	108	580.3278	1158.6411	1158.6431	-1.71	0	54	1	U	K.ISLCDALIVR.S
		99	108	580.3279	1158.6412	1158.6431	-1.60	0	55	1	U	K.ISLCDALIVR.S
		99	108	580.3279	1158.6413	1158.6431	-1.50	0	82	1	U	K.ISLCDALIVR.S
		99	108	580.3279	1158.6413	1158.6431	-1.50	0	82	1	U	K.ISLCDALIVR.S
		99	108	580.3281	1158.6416	1158.6431	-1.29	0	77	1	U	K.ISLCDALIVR.S
		99	108	580.3281	1158.6416	1158.6431	-1.29	0	82	1	U	K.ISLCDALIVR.S
		99	108	580.3281	1158.6417	1158.6431	-1.17	0	77	1	U	K.ISLCDALIVR.S
		99	108	580.3281	1158.6417	1158.6431	-1.17	0	64	1	U	K.ISLCDALIVR.S
		99	108	580.3281	1158.6417	1158.6431	-1.17	0	83	1	U	K.ISLCDALIVR.S
		99	108	580.3281	1158.6417	1158.6431	-1.17	0	71	1	U	K.ISLCDALIVR.S
		99	108	580.3281	1158.6417	1158.6431	-1.17	0	40	1	U	K.ISLCDALIVR.S
		99	108	580.3282	1158.6418	1158.6431	-1.07	0	67	1	U	K.ISLCDALIVR.S
		99	108	580.3282	1158.6418	1158.6431	-1.07	0	77	1	U	K.ISLCDALIVR.S
		99	108	580.3282	1158.6418	1158.6431	-1.07	0	77	1	U	K.ISLCDALIVR.S
		99	108	580.3282	1158.6418	1158.6431	-1.07	0	82	1	U	K.ISLCDALIVR.S
		99	108	580.3283	1158.6419	1158.6431	-0.96	0	77	1	U	K.ISLCDALIVR.S
		99	108	580.3283	1158.6421	1158.6431	-0.86	0	67	1	U	K.ISLCDALIVR.S
		99	108	580.3283	1158.6421	1158.6431	-0.86	0	83	1	U	K.ISLCDALIVR.S
		99	108	580.3284	1158.6422	1158.6431	-0.76	0	59	1	U	K.ISLCDALIVR.S
		99	108	580.3284	1158.6423	1158.6431	-0.65	0	77	1	U	K.ISLCDALIVR.S
		99	108	580.3285	1158.6424	1158.6431	-0.55	0	77	1	U	K.ISLCDALIVR.S
		99	108	580.3285	1158.6424	1158.6431	-0.55	0	77	1	U	K.ISLCDALIVR.S
		99	108	580.3285	1158.6424	1158.6431	-0.55	0	77	1	U	K.ISLCDALIVR.S
		99	108	580.3286	1158.6427	1158.6431	-0.34	0	77	1	U	K.ISLCDALIVR.S
		99	108	580.3286	1158.6427	1158.6431	-0.34	0	82	1	U	K.ISLCDALIVR.S
		99	108	580.3287	1158.6428	1158.6431	-0.24	0	56	1	U	K.ISLCDALIVR.S
		99	108	580.3289	1158.6433	1158.6431	0.19	0	82	1	U	K.ISLCDALIVR.S
		99	108	580.3290	1158.6434	1158.6431	0.30	0	72	1	U	K.ISLCDALIVR.S
		99	108	580.3291	1158.6436	1158.6431	0.50	0	80	1	U	K.ISLCDALIVR.S
		99	108	580.3292	1158.6438	1158.6431	0.61	0	69	1	U	K.ISLCDALIVR.S
		99	108	580.3297	1158.6447	1158.6431	1.45	0	82	1	U	K.ISLCDALIVR.S
		99	108	588.3241	1174.6336	1174.6202	11.4	0	30	1	U	K.ISLCDALIVR.S + [+15.9772 at S2]
		99	108	588.3257	1174.6368	1174.6202	14.1	0	29	1	U	K.ISLCDALIVR.S + [+15.9772 at S2]
		99	108	588.3325	1174.6505	1174.6202	25.8	0	30	1	U	K.ISLCDALIVR.S + [+15.9772 at S2]
		131	141	564.8040	1127.5935	1127.5935	-0.0027	0	59	1	U	R.AGVGIDNVDLS.A + [+69.0691 at C-term S]
		131	157	892.4389	2674.2949	2674.2909	1.50	0	44	1	U	R.AGVGIDNVDLSAATEFGCLVVNAPTAN.T
		158	174	555.9749	1664.9029	1664.9032	-0.16	0	43	1	U	N.TIAAAEHGIALMAAMAR.N + [-31.9721 at M12]
		158	174	841.4534	1680.8923	1680.8981	-3.44	0	73	1	U	N.TIAAAEHGIALMAAMAR.N + Oxidation (M); [-31.9721 at M15]
		158	174	841.4547	1680.8949	1680.8981	-1.92	0	81	1	U	N.TIAAAEHGIALMAAMAR.N + Oxidation (M); [-31.9721 at M15]
		158	174	841.4550	1680.8955	1680.8981	-1.55	0	78	1	U	N.TIAAAEHGIALMAAMAR.N + Oxidation (M); [-31.9721 at M15]
		158	174	561.3058	1680.8955	1680.8981	-1.51	0	29	1	U	N.TIAAAEHGIALMAAMAR.N + Oxidation (M); [-31.9721 at M12]
		158	174	841.4553	1680.8960	1680.8981	-1.26	0	78	1	U	N.TIAAAEHGIALMAAMAR.N + Oxidation (M); [-31.9721 at M15]
		158	174	561.3060	1680.8961	1680.8981	-1.19	0	28	1	U	N.TIAAAEHGIALMAAMAR.N + Oxidation (M); [-31.9721 at M12]
		158	174	841.4554	1680.8962	1680.8981	-1.12	0	45	1	U	N.TIAAAEHGIALMAAMAR.N + Oxidation (M); [-31.9721 at M15]
		158	174	841.4560	1680.8974	1680.8981	-0.39	0	76	1	U	N.TIAAAEHGIALMAAMAR.N + Oxidation (M); [-31.9721 at M15]
		158	174	561.3066	1680.8979	1680.8981	-0.10	0	28	1	U	N.TIAAAEHGIALMAAMAR.N + Oxidation (M); [-31.9721 at M12]
		158	174	841.4582	1680.9018	1680.8981	2.23	0	79	1	U	N.TIAAAEHGIALMAAMAR.N + Oxidation (M); [-31.9721 at M15]
		158	174	561.3081	1680.9025	1680.8981	2.63	0	30	1	U	N.TIAAAEHGIALMAAMAR.N + Oxidation (M); [-31.9721 at M12]
		158	174	841.4586	1680.9027	1680.8981	2.74	0	71	1	U	N.TIAAAEHGIALMAAMAR.N + Oxidation (M); [-31.9721 at M15]
		158	174	841.4605	1680.9065	1680.8981	4.99	0	77	1	U	N.TIAAAEHGIALMAAMAR.N + Oxidation (M); [-31.9721 at M12]
		158	174	841.4611	1680.9077	1680.8981	5.71	0	41	1	U	N.TIAAAEHGIALMAAMAR.N + Oxidation (M); [-31.9721 at M15]
		158	174	841.4661	1680.9176	1680.8981	11.6	0	78	1	U	N.TIAAAEHGIALMAAMAR.N + Oxidation (M); [-31.9721 at M15]
		158	174	561.3132	1680.9177	1680.8981	11.7	0	31	1	U	N.TIAAAEHGIALMAAMAR.N + Oxidation (M); [-31.9721 at M12]
		158	174	566.6377	1696.8913	1696.8752	9.45	0	37	1	U	N.TIAAAEHGIALMAAMAR.N
		158	174	566.6381	1696.8924	1696.8752	10.1	0	34	1	U	N.TIAAAEHGIALMAAMAR.N
		158	174	849.4537	1696.8929	1696.8752	10.4	0	63	1	U	N.TIAAAEHGIALMAAMAR.N
		158	174	849.4544	1696.8943	1696.8752	11.2	0	66	1	U	N.TIAAAEHGIALMAAMAR.N
		158	174	571.3088	1710.9045	1710.8909	7.97	0	29	1	U	N.TIAAAEHGIALMAAMAR.N + [+14.0157 at C-term R]
		158	174	571.3090	1710.9052	1710.8909	8.39	0	30	1	U	N.TIAAAEHGIALMAAMAR.N + [+14.0157 at C-term R]
		158	174	571.3094	1710.9063	1710.8909	9.04	0	30	1	U	N.TIAAAEHGIALMAAMAR.N + [+14.0157 at C-term R]
		158	174	571.3098	1710.9076	1710.8909	9.77	0	33	1	U	N.TIAAAEHGIALMAAMAR.N + [+14.0157 at C-term R]
		158	174	856.4615	1710.9084	1710.8909	10.3	0	31	1	U	N.TIAAAEHGIALMAAMAR.N + [+14.0157 at C-term R]
		164	184	1013.5062	2024.9979	2025.0135	-7.72	1	32	1	U	E.HGIALMAAMARNVAQADASVK.A + [-99.0796 at R11]
		175	184	501.7618	1001.5091	1001.4778	31.2	0	40	1	U	R.NVAQADASVK.A + [-0.0364 at C-term K]
		175	184	501.7625	1001.5105	1001.4778	32.6	0	58	1	U	R.NVAQADASVK.A + [-0.0364 at C-term K]
		175	184	501.7625	1001.5105	1001.4778	32.7	0	40	1	U	R.NVAQADASVK.A + [-0.0364 at C-term K]
		175	184	501.7631	1001.5116	1001.4778	33.8	0	47	1	U	R.NVAQADASVK.A + [-0.0364 at C-term K]
		175	184	501.7631	1001.5117	1001.4778	33.9	0	45	1	U	R.NVAQADASVK.A + [-0.0364 at C-term K]
		175	184	501.7632	1001.5118	1001.4778	34.0	0	36	1	U	R.NVAQADASVK.A + [-0.0364 at C-term K]
		175	184	501.7632	1001.5119	1001.4778	34.1	0	36	1	U	R.NVAQADASVK.A + [-0.0364 at C-term K]
		175	184	501.7632	1001.5119	1001.4778	34.1	0	44	1	U	R.NVAQADASVK.A + [-0.0364 at C-term K]
		175	184	501.7634	1001.5123	1001.4778	34.5	0	59	1	U	R.NVAQADASVK.A + [-0.0364 at C-term K]
		175	184	501.7636	1001.5126	1001.4778	34.8	0	25	1	U	R.NVAQADASVK.A + [-0.0364 at C-term K]
		175	184	501.7636	1001.5127	1001.4778	34.8	0	41	1	U	R.NVAQADASVK.A + [-0.0364 at C-term K]
		175	184	501.7636	1001.5127	1001.4778	34.8	0	49	1	U	R.NVAQADASVK.A + [-0.0364 at C-term K]
		175	184	501.7636	1001.5127	1001.4778	34.9	0	38	1	U	R.NVAQADASVK.A + [-0.0364 at C-term K]
		175	184	501.7637	1001.5129	1001.4778	35.1	0	57	1	U	R.NVAQADASVK.A + [-0.0364 at C-term K]
		175	184	501.7638	1001.5130	1001.4778	35.2	0	34	1	U	R.NVAQADASVK.A + [-0.0364 at C-term K]
		175	184	501.7638	1001.5131	1001.4778	35.3	0	37	1	U	R.NVAQADASVK.A + [-0.0364 at C-term K]
		175	184	501.7641	1001.5136	1001.4778	35.8	0	47	1	U	R.NVAQADASVK.A + [-0.0364 at C-term K]
		175	184	501.7642	1001.5139	1001.4778	36.1	0	49	1	U	R.NVAQADASVK.A + [-0.0364 at C-term K]
		175	184	501.7642	1001.5139	1001.4778	36.1	0	52	1	U	R.NVAQADASVK.A + [-0.0364 at C-term K]
		175	184	501.7643	1001.5140	1001.4778	36.2	0	49	1	U	R.NVAQADASVK.A + [-0.0364 at C-term K]
		175	184	501.7645	1001.5145	1001.4778	36.7	0	49	1	U	R.NVAQADASVK.A + [-0.0364 at C-term K]
		175	184	501.7646	1001.5146	1001.4778	36.7	0	59	1	U	R.NVAQADASVK.A + [-0.0364 at C-term K]
		175	184	501.7646	1001.5146	1001.4778	36.8	0	49	1	U	R.NVAQADASVK.A + [-0.0364 at C-term K]
		175	184	501.7646	1001.5147	1001.4778	36.9	0	47	1	U	R.NVAQADASVK.A + [-0.0364 at C-term K]
		175	184	501.7648	1001.5150	1001.4778	37.2	0	48	1	U	R.NVAQADASVK.A + [-0.0364 at C-term K]
		175	184	501.7648	1001.5150	1001.4778	37.2	0	51	1	U	R.NVAQADASVK.A + [-0.0364 at C-term K]
		175	184	501.7649	1001.5152	1001.4778	37.3	0	46	1	U	R.NVAQADASVK.A + [-0.0364 at C-term K]
		175	184	501.7649	1001.5153	1001.4778	37.4	0	49	1	U	R.NVAQADASVK.A + [-0.0364 at C-term K]
		175	184	501.7656	1001.5167	1001.4778	38.9	0	44	1	U	R.NVAQADASVK.A + [-0.0364 at C-term K]
		175	184	501.7659	1001.5173	1001.4778	39.5	0	45	1	U	R.NVAQADASVK.A + [-0.0364 at C-term K]
		175	184	501.7662	1001.5179	1001.5506	-32.6	0	47	1	U	R.NVAQADASVK.A + [+0.0364 at Q4]
		175	184	502.2555	1002.4964	1002.4982	-1.74	0	48	1	U	R.NVAQADASVK.A + [+0.9840 at N-term N]
		175	184	502.2556	1002.4965	1002.4982	-1.62	0	52	1	U	R.NVAQADASVK.A + [+0.9840 at N-term N]
		175	184	502.2557	1002.4968	1002.4982	-1.36	0	57	1	U	R.NVAQADASVK.A + [+0.9840 at N-term N]
		175	184	502.2563	1002.4981	1002.4982	-0.081	0	43	1	U	R.NVAQADASVK.A + [+0.9840 at Q4]
		175	184	502.2565	1002.4984	1002.4982	0.28	0	35	1	U	R.NVAQADASVK.A + [+0.9840 at Q4]
		175	184	502.2566	1002.4987	1002.4982	0.52	0	34	1	U	R.NVAQADASVK.A + [+0.9840 at N-term N]
		175	184	509.2632	1016.5118	1016.5138	-1.98	0	52	1	U	R.NVAQADASVK.A + [+14.9997 at Q4]
		175	184	509.2635	1016.5124	1016.5138	-1.37	0	39	1	U	R.NVAQADASVK.A + [+14.9997 at Q4]
		175	184	512.7534	1023.4922	1023.4961	-3.85	0	55	1	U	R.NVAQADASVK.A + [+21.9819 at D6]
		178	184	421.6810	841.3475	841.3219	30.5	0	28	1	U	A.QADASVK.A + Phospho (ST); [+43.9898 at D3]
		185	189	302.6574	603.3003	603.3017	-2.29	0	26	1	U	K.AGEWK.R + [+14.0157 at E3]
		192	201	582.8346	1163.6546	1163.6550	-0.34	1	29	1	U	N.KYVGVSLVGK.T + Carbamidomethyl (K); [+58.0055 at N-term]
		193	201	461.2703	920.5261	920.4968	31.9	0	49	1	U	K.YVGVSLVGK.T + [-0.0364 at C-term K]
		193	201	461.2715	920.5285	920.4968	34.5	0	39	1	U	K.YVGVSLVGK.T + [-0.0364 at C-term K]
		193	201	461.2717	920.5289	920.4968	34.9	0	25	1	U	K.YVGVSLVGK.T + [-0.0364 at C-term K]
		193	201	461.2720	920.5294	920.4968	35.5	0	34	1	U	K.YVGVSLVGK.T + [-0.0364 at C-term K]
		193	201	461.2720	920.5294	920.4968	35.5	0	40	1	U	K.YVGVSLVGK.T + [-0.0364 at C-term K]
		193	201	461.2723	920.5300	920.4968	36.1	0	40	1	U	K.YVGVSLVGK.T + [-0.0364 at C-term K]
		193	201	461.2726	920.5305	920.4968	36.7	0	42	1	U	K.YVGVSLVGK.T + [-0.0364 at C-term K]
		193	201	461.2730	920.5315	920.4968	37.8	0	45	1	U	K.YVGVSLVGK.T + [-0.0364 at C-term K]
		193	201	461.2731	920.5316	920.4968	37.8	0	43	1	U	K.YVGVSLVGK.T + [-0.0364 at C-term K]
		193	201	461.2731	920.5316	920.4968	37.8	0	44	1	U	K.YVGVSLVGK.T + [-0.0364 at C-term K]
		193	201	461.2731	920.5316	920.4968	37.9	0	45	1	U	K.YVGVSLVGK.T + [-0.0364 at C-term K]
		193	201	461.2732	920.5318	920.4968	38.1	0	47	1	U	K.YVGVSLVGK.T + [-0.0364 at C-term K]
		193	201	461.2732	920.5319	920.4968	38.2	0	41	1	U	K.YVGVSLVGK.T + [-0.0364 at C-term K]
		193	201	461.2732	920.5319	920.4968	38.2	0	46	1	U	K.YVGVSLVGK.T + [-0.0364 at C-term K]
		193	201	461.2734	920.5323	920.4968	38.6	0	41	1	U	K.YVGVSLVGK.T + [-0.0364 at C-term K]
		202	210	462.2538	922.4930	922.4946	-1.76	0	80	1	U	K.TLAVLGFGK.V + [+17.9564 at L5]
		202	210	462.2539	922.4933	922.4946	-1.41	0	80	1	U	K.TLAVLGFGK.V + [+17.9564 at L5]
		202	210	470.2545	938.4944	938.5226	-30.0	0	32	1	U	K.TLAVLGFGK.V + [+33.9843 at L5]
		211	217	366.2048	730.3951	730.3974	-3.08	0	70	1	U	K.VGTEVAR.R
		211	217	373.2129	744.4112	744.4130	-2.39	0	54	1	U	K.VGTEVAR.R + [+14.0157 at E4]
		211	217	380.2016	758.3886	758.3923	-4.78	0	32	1	U	K.VGTEVAR.R + [+27.9949 at T3]
		211	217	380.2020	758.3894	758.3923	-3.80	0	28	1	U	K.VGTEVAR.R + [+27.9949 at T3]
		211	217	380.2207	758.4268	758.4286	-2.46	0	47	1	U	K.VGTEVAR.R + [+28.0313 at E4]
		211	217	380.2207	758.4268	758.4286	-2.38	0	47	1	U	K.VGTEVAR.R + [+28.0313 at E4]
		226	235	527.2709	1052.5273	1052.5291	-1.67	0	37	1	U	R.VIAHDPYAPA.D
		226	237	442.2235	1323.6486	1323.6571	-6.44	0	30	1	U	R.VIAHDPYAPADR.A
		226	237	442.2247	1323.6522	1323.6571	-3.74	0	46	1	U	R.VIAHDPYAPADR.A
		226	237	442.2251	1323.6534	1323.6571	-2.84	0	46	1	U	R.VIAHDPYAPADR.A
		226	237	442.2253	1323.6540	1323.6571	-2.36	0	45	1	U	R.VIAHDPYAPADR.A
		226	237	662.8344	1323.6543	1323.6571	-2.17	0	44	1	U	R.VIAHDPYAPADR.A
		226	237	662.8346	1323.6546	1323.6571	-1.89	0	55	1	U	R.VIAHDPYAPADR.A
		226	237	442.2256	1323.6549	1323.6571	-1.72	0	29	1	U	R.VIAHDPYAPADR.A
		226	237	662.8347	1323.6549	1323.6571	-1.70	0	53	1	U	R.VIAHDPYAPADR.A
		226	237	662.8348	1323.6550	1323.6571	-1.61	0	55	1	U	R.VIAHDPYAPADR.A
		226	237	662.8348	1323.6550	1323.6571	-1.61	0	55	1	U	R.VIAHDPYAPADR.A
		226	237	662.8348	1323.6551	1323.6571	-1.52	0	55	1	U	R.VIAHDPYAPADR.A
		226	237	669.8425	1337.6705	1337.6364	25.5	0	44	1	U	R.VIAHDPYAPADR.A + [+13.9793 at P9]
		226	237	669.8427	1337.6707	1337.6364	25.7	0	44	1	U	R.VIAHDPYAPADR.A + [+13.9793 at P9]
		226	237	669.8416	1337.6687	1337.6728	-3.08	0	38	1	U	R.VIAHDPYAPADR.A + [+14.0157 at D5]
		226	237	446.8973	1337.6702	1337.6728	-1.94	0	40	1	U	R.VIAHDPYAPADR.A + [+14.0157 at D11]
		226	237	669.8426	1337.6706	1337.6728	-1.62	0	44	1	U	R.VIAHDPYAPADR.A + [+14.0157 at D5]
		226	237	446.8975	1337.6706	1337.6728	-1.61	0	34	1	U	R.VIAHDPYAPADR.A + [+14.0157 at D11]
		226	237	446.8976	1337.6708	1337.6728	-1.47	0	40	1	U	R.VIAHDPYAPADR.A + [+14.0157 at D5]
		226	237	446.8976	1337.6708	1337.6728	-1.47	0	40	1	U	R.VIAHDPYAPADR.A + [+14.0157 at D5]
		226	237	669.8430	1337.6714	1337.6728	-1.06	0	60	1	U	R.VIAHDPYAPADR.A + [+14.0157 at D5]
		226	237	446.8978	1337.6717	1337.6728	-0.84	0	42	1	U	R.VIAHDPYAPADR.A + [+14.0157 at D5]
		226	237	446.8978	1337.6717	1337.6728	-0.84	0	42	1	U	R.VIAHDPYAPADR.A + [+14.0157 at D5]
		226	237	669.8431	1337.6717	1337.6728	-0.79	0	60	1	U	R.VIAHDPYAPADR.A + [+14.0157 at D5]
		226	237	669.8433	1337.6721	1337.6728	-0.53	0	64	1	U	R.VIAHDPYAPADR.A + [+14.0157 at D5]
		226	237	446.8980	1337.6721	1337.6728	-0.51	0	45	1	U	R.VIAHDPYAPADR.A + [+14.0157 at D5]
		226	237	669.8435	1337.6725	1337.6728	-0.24	0	62	1	U	R.VIAHDPYAPADR.A + [+14.0157 at D5]
		226	237	669.8439	1337.6733	1337.6728	0.39	0	43	1	U	R.VIAHDPYAPADR.A + [+14.0157 at D5]
		226	237	670.8329	1339.6513	1339.6521	-0.53	0	35	1	U	R.VIAHDPYAPADR.A + [+15.9949 at Y7]
		231	237	395.1975	788.3803	788.3817	-1.69	0	35	1	U	D.PYAPADR.A
		231	237	395.1975	788.3803	788.3817	-1.69	0	30	1	U	D.PYAPADR.A
		231	237	395.1976	788.3806	788.3817	-1.39	0	51	1	U	D.PYAPADR.A
		253	270	639.6634	1915.9683	1915.9714	-1.58	0	60	1	U	L.ATADFISLHMPLTPTTSK.I + Oxidation (M); [-30.0106 at T15]
		257	270	779.9159	1557.8173	1557.8225	-3.32	0	51	1	U	D.FISLHMPLTPTTSK.I + Oxidation (M); [-30.0106 at T11]
		261	270	541.7866	1081.5587	1081.5590	-0.32	0	37	1	U	L.HMPLTPTTSK.I + [-30.0106 at T7]
		261	270	541.7870	1081.5594	1081.5590	0.36	0	36	1	U	L.HMPLTPTTSK.I + [-30.0106 at T7]
		261	270	541.7871	1081.5595	1081.5590	0.47	0	35	1	U	L.HMPLTPTTSK.I + [-30.0106 at T7]
		261	270	549.7831	1097.5516	1097.5540	-2.14	0	59	1	U	L.HMPLTPTTSK.I + Oxidation (M); [-30.0106 at T7]
		261	270	549.7832	1097.5518	1097.5540	-1.92	0	67	1	U	L.HMPLTPTTSK.I + Oxidation (M); [-30.0106 at T7]
		261	270	549.7834	1097.5522	1097.5540	-1.57	0	59	1	U	L.HMPLTPTTSK.I + Oxidation (M); [-30.0106 at T7]
		262	270	473.2564	944.4983	944.5001	-1.96	0	51	1	U	H.MPLTPTTSK.I + [-30.0106 at T6]
		262	270	473.2567	944.4989	944.5001	-1.26	0	49	1	U	H.MPLTPTTSK.I + [-30.0106 at T6]
		262	270	481.2537	960.4928	960.4950	-2.37	0	69	1	U	H.MPLTPTTSK.I + Oxidation (M); [-30.0106 at T6]
		263	270	407.7359	813.4572	813.4596	-2.94	0	49	1	U	M.PLTPTTSK.I + [-30.0106 at T5]
		263	270	407.7364	813.4583	813.4596	-1.66	0	40	1	U	M.PLTPTTSK.I + [-30.0106 at T5]
		271	279	525.7754	1049.5363	1049.5029	31.8	0	36	1	U	K.ILNDETFAK.M + [-0.0364 at C-term K]
		271	279	525.7758	1049.5370	1049.5029	32.4	0	43	1	U	K.ILNDETFAK.M + [-0.0364 at C-term K]
		271	279	525.7758	1049.5371	1049.5029	32.5	0	63	1	U	K.ILNDETFAK.M + [-0.0364 at C-term K]
		271	279	525.7759	1049.5373	1049.5029	32.8	0	64	1	U	K.ILNDETFAK.M + [-0.0364 at C-term K]
		271	279	525.7759	1049.5373	1049.5029	32.8	0	63	1	U	K.ILNDETFAK.M + [-0.0364 at C-term K]
		271	279	525.7763	1049.5379	1049.5029	33.4	0	64	1	U	K.ILNDETFAK.M + [-0.0364 at C-term K]
		271	279	525.7763	1049.5381	1049.5029	33.5	0	64	1	U	K.ILNDETFAK.M + [-0.0364 at C-term K]
		271	279	525.7764	1049.5382	1049.5029	33.6	0	64	1	U	K.ILNDETFAK.M + [-0.0364 at C-term K]
		271	279	525.7766	1049.5387	1049.5029	34.1	0	63	1	U	K.ILNDETFAK.M + [-0.0364 at C-term K]
		271	279	525.7775	1049.5404	1049.5029	35.7	0	44	1	U	K.ILNDETFAK.M + [-0.0364 at C-term K]
		271	279	525.7787	1049.5428	1049.5029	38.0	0	27	1	U	K.ILNDETFAK.M + [-0.0364 at C-term K]
		271	279	526.2687	1050.5228	1050.5233	-0.48	0	63	1	U	K.ILNDETFAK.M + [+0.9840 at N3]
		271	279	526.2689	1050.5233	1050.5233	-0.026	0	63	1	U	K.ILNDETFAK.M + [+0.9840 at N3]
		271	279	526.2695	1050.5244	1050.5233	1.02	0	63	1	U	K.ILNDETFAK.M + [+0.9840 at N3]
		271	279	526.2698	1050.5251	1050.5233	1.73	0	63	1	U	K.ILNDETFAK.M + [+0.9840 at N3]
		271	279	532.7842	1063.5539	1063.5550	-0.97	0	64	1	U	K.ILNDETFAK.M + [+14.0157 at E5]
		271	279	532.7842	1063.5539	1063.5550	-0.97	0	64	1	U	K.ILNDETFAK.M + [+14.0157 at E5]
		271	279	536.7661	1071.5177	1071.5002	16.3	0	31	1	U	K.ILNDETFAK.M + Phospho (ST); [-58.0055 at E5]
		271	279	536.7656	1071.5167	1071.5212	-4.23	0	32	1	U	K.ILNDETFAK.M + [+21.9819 at C-term]
		271	279	536.7657	1071.5168	1071.5212	-4.12	0	35	1	U	K.ILNDETFAK.M + [+21.9819 at C-term]
		271	279	536.7660	1071.5174	1071.5212	-3.56	0	33	1	U	K.ILNDETFAK.M + [+21.9819 at C-term]
		286	291	336.2123	670.4100	670.4126	-3.86	0	38	1	U	R.IVNVAR.G
		286	291	336.2123	670.4101	670.4126	-3.77	0	38	1	U	R.IVNVAR.G
		286	291	336.7043	671.3941	671.3966	-3.75	0	32	1	U	R.IVNVAR.G + [+0.9840 at N3]
		286	291	336.7044	671.3943	671.3966	-3.48	0	33	1	U	R.IVNVAR.G + [+0.9840 at N3]
		292	302	572.2997	1142.5849	1142.5932	-7.20	0	42	1	U	R.GGVIDEDALVR.A
		292	302	572.3027	1142.5908	1142.5932	-2.07	0	43	1	U	R.GGVIDEDALVR.A
		292	302	572.3028	1142.5910	1142.5932	-1.84	0	29	1	U	R.GGVIDEDALVR.A
		292	302	572.3029	1142.5913	1142.5932	-1.63	0	57	1	U	R.GGVIDEDALVR.A
		292	302	572.3029	1142.5913	1142.5932	-1.63	0	45	1	U	R.GGVIDEDALVR.A
		292	302	572.3030	1142.5915	1142.5932	-1.42	0	47	1	U	R.GGVIDEDALVR.A
		292	302	572.3032	1142.5919	1142.5932	-1.11	0	42	1	U	R.GGVIDEDALVR.A
		292	302	572.3032	1142.5919	1142.5932	-1.11	0	46	1	U	R.GGVIDEDALVR.A
		292	302	572.3033	1142.5921	1142.5932	-0.90	0	44	1	U	R.GGVIDEDALVR.A
		292	302	572.3033	1142.5921	1142.5932	-0.90	0	33	1	U	R.GGVIDEDALVR.A
		292	302	572.3034	1142.5923	1142.5932	-0.78	0	44	1	U	R.GGVIDEDALVR.A
		292	302	572.3035	1142.5924	1142.5932	-0.67	0	57	1	U	R.GGVIDEDALVR.A
		292	302	572.3038	1142.5930	1142.5932	-0.15	0	42	1	U	R.GGVIDEDALVR.A
		292	302	572.3043	1142.5941	1142.5932	0.82	0	41	1	U	R.GGVIDEDALVR.A
		292	302	572.3048	1142.5949	1142.5932	1.57	0	27	1	U	R.GGVIDEDALVR.A
		292	302	572.3049	1142.5953	1142.5932	1.88	0	29	1	U	R.GGVIDEDALVR.A
		292	302	572.3054	1142.5962	1142.5932	2.64	0	27	1	U	R.GGVIDEDALVR.A
		292	302	572.3063	1142.5981	1142.5932	4.35	0	57	1	U	R.GGVIDEDALVR.A
		292	302	579.3108	1156.6070	1156.6088	-1.54	0	64	1	U	R.GGVIDEDALVR.A + [+14.0157 at E6]
		292	302	579.3110	1156.6075	1156.6088	-1.11	0	73	1	U	R.GGVIDEDALVR.A + [+14.0157 at E6]
		292	302	579.3111	1156.6076	1156.6088	-1.00	0	57	1	U	R.GGVIDEDALVR.A + [+14.0157 at E6]
		292	302	579.3113	1156.6081	1156.6088	-0.59	0	48	1	U	R.GGVIDEDALVR.A + [+14.0157 at E6]
		292	302	579.3114	1156.6082	1156.6088	-0.49	0	56	1	U	R.GGVIDEDALVR.A + [+14.0157 at E6]
		292	302	579.3121	1156.6097	1156.6088	0.78	0	57	1	U	R.GGVIDEDALVR.A + [+14.0157 at E6]
		292	302	583.2925	1164.5705	1164.5751	-3.93	0	42	1	U	R.GGVIDEDALVR.A + [+21.9819 at D5]
		292	302	583.2934	1164.5722	1164.5751	-2.45	0	33	1	U	R.GGVIDEDALVR.A + [+21.9819 at D5]
		292	302	583.2935	1164.5725	1164.5751	-2.25	0	41	1	U	R.GGVIDEDALVR.A + [+21.9819 at D5]
		292	302	394.5195	1180.5368	1180.5490	-10.4	0	55	1	U	R.GGVIDEDALVR.A + [+37.9559 at D5]
		292	302	394.5196	1180.5369	1180.5490	-10.3	0	52	1	U	R.GGVIDEDALVR.A + [+37.9559 at D5]
		292	302	394.5197	1180.5373	1180.5490	-9.94	0	51	1	U	R.GGVIDEDALVR.A + [+37.9559 at D5]
		293	302	572.8028	1143.5910	1143.5772	12.1	0	34	1	U	G.GVIDEDALVR.A + [+58.0055 at N-term]
		294	302	583.2957	1164.5769	1164.5332	37.5	0	69	1	U	G.VIDEDALVR.A + [+135.9830 at N-term]
		294	302	585.3106	1168.6065	1168.6452	-33.1	0	42	1	U	G.VIDEDALVR.A + [+140.0950 at N-term]
		294	302	585.3113	1168.6080	1168.6452	-31.8	0	45	1	U	G.VIDEDALVR.A + [+140.0950 at N-term]
		303	311	440.2310	878.4474	878.4474	0.081	0	30	1	U	R.ALDAGIVAQ.A + [+21.9819 at C-term]
		303	319	568.3137	1701.9192	1701.8938	14.9	0	70	1	U	R.ALDAGIVAQAALDVFTK.E + [-0.0364 at C-term K]
		303	319	851.9695	1701.9244	1701.8938	18.0	0	67	1	U	R.ALDAGIVAQAALDVFTK.E + [-0.0364 at C-term K]
		303	319	568.3156	1701.9250	1701.8938	18.4	0	70	1	U	R.ALDAGIVAQAALDVFTK.E + [-0.0364 at C-term K]
		303	319	568.3159	1701.9258	1701.8938	18.8	0	61	1	U	R.ALDAGIVAQAALDVFTK.E + [-0.0364 at C-term K]
		303	319	568.3164	1701.9272	1701.8938	19.7	0	72	1	U	R.ALDAGIVAQAALDVFTK.E + [-0.0364 at C-term K]
		303	319	568.3171	1701.9296	1701.8938	21.1	0	56	1	U	R.ALDAGIVAQAALDVFTK.E + [-0.0364 at C-term K]
		303	319	568.3177	1701.9312	1701.8938	22.0	0	60	1	U	R.ALDAGIVAQAALDVFTK.E + [-0.0364 at C-term K]
		303	319	568.3195	1701.9366	1701.8938	25.1	0	63	1	U	R.ALDAGIVAQAALDVFTK.E + [-0.0364 at C-term K]
		303	319	859.9727	1717.9309	1717.9250	3.40	0	27	1	U	R.ALDAGIVAQAALDVFTK.E + [+15.9949 at A11]
		311	319	467.7710	933.5274	933.5284	-1.00	0	25	1	U	A.QAALDVFTK.E + [-58.0055 at D5]
		311	319	467.7711	933.5277	933.5284	-0.68	0	24	1	U	A.QAALDVFTK.E + [-58.0055 at D5]
		312	319	432.7440	863.4734	863.4389	40.0	0	52	1	U	Q.AALDVFTK.E + [-0.0364 at C-term K]
		312	319	432.7441	863.4736	863.4753	-1.92	0	49	1	U	Q.AALDVFTK.E
		312	319	432.7442	863.4738	863.4753	-1.64	0	57	1	U	Q.AALDVFTK.E
		312	319	432.7465	863.4785	863.4753	3.73	0	52	1	U	Q.AALDVFTK.E
		325	333	541.2695	1080.5245	1080.5676	-39.9	1	34	1	U	K.DSKLVQHER.V + [-30.0106 at S2]
		325	333	541.2702	1080.5258	1080.5676	-38.7	1	30	1	U	K.DSKLVQHER.V + [-30.0106 at S2]
		326	333	540.7737	1079.5329	1079.5426	-8.99	1	37	1	U	D.SKLVQHER.V + Phospho (ST); [+4.0251 at K2]
		326	333	540.7739	1079.5333	1079.5426	-8.64	1	32	1	U	D.SKLVQHER.V + Phospho (ST); [+4.0251 at K2]
		326	333	540.7739	1079.5333	1079.5426	-8.64	1	31	1	U	D.SKLVQHER.V + Phospho (ST); [+4.0251 at K2]
		326	333	360.8518	1079.5335	1079.5426	-8.45	1	28	1	U	D.SKLVQHER.V + Phospho (ST); [+4.0251 at K2]
		326	333	360.8519	1079.5338	1079.5426	-8.20	1	28	1	U	D.SKLVQHER.V + Phospho (ST); [+4.0251 at K2]
		326	333	360.8519	1079.5339	1079.5426	-8.12	1	28	1	U	D.SKLVQHER.V + Phospho (ST); [+4.0251 at K2]
		326	333	540.7744	1079.5341	1079.5426	-7.86	1	29	1	U	D.SKLVQHER.V + Phospho (ST); [+4.0251 at K2]
		326	333	360.8521	1079.5345	1079.5426	-7.53	1	37	1	U	D.SKLVQHER.V + Phospho (ST); [+4.0251 at K2]
		327	333	322.5100	964.5082	964.5454	-38.6	1	30	1	U	S.KLVQHER.V + [+56.0262 at N-term]
		327	333	483.2616	964.5087	964.5454	-38.0	1	33	1	U	S.KLVQHER.V + [+56.0262 at N-term]
		334	339	327.1838	652.3530	652.3544	-2.20	0	57	1	U	R.VTVTPH.L
		334	339	327.1838	652.3530	652.3544	-2.20	0	57	1	U	R.VTVTPH.L
		334	340	383.7256	765.4366	765.4385	-2.45	0	39	1	U	R.VTVTPHL.G
		334	343	491.2716	980.5287	980.5291	-0.45	0	33	1	U	R.VTVTPHLGAS.T
		334	345	607.3153	1212.6161	1212.6173	-1.00	0	38	1	U	R.VTVTPHLGASTM.E
		334	345	615.3127	1228.6108	1228.6122	-1.13	0	48	1	U	R.VTVTPHLGASTM.E + Oxidation (M)
		381	394	808.4824	1614.9502	1614.9596	-5.86	0	67	1	U	E.VLTELKPYVVLAEK.L + [+14.0157 at V10]
		381	394	808.4858	1614.9570	1614.9596	-1.62	0	67	1	U	E.VLTELKPYVVLAEK.L + [+14.0157 at V10]
		381	394	808.4861	1614.9577	1614.9596	-1.16	0	69	1	U	E.VLTELKPYVVLAEK.L + [+14.0157 at V10]
		381	394	539.3270	1614.9591	1614.9596	-0.34	0	68	1	U	E.VLTELKPYVVLAEK.L + [+14.0157 at V10]
		387	394	466.7752	931.5359	931.5379	-2.07	0	55	1	U	K.PYVVLAEK.L + [+14.0157 at V4]
		387	394	466.7754	931.5363	931.5379	-1.68	0	56	1	U	K.PYVVLAEK.L + [+14.0157 at V4]
		387	394	466.7759	931.5373	931.5379	-0.63	0	45	1	U	K.PYVVLAEK.L + [+14.0157 at V4]
		389	394	336.7173	671.4200	671.4218	-2.59	0	39	1	U	Y.VVLAEK.L + [+14.0157 at V2]
		389	394	336.7173	671.4201	671.4218	-2.50	0	39	1	U	Y.VVLAEK.L + [+14.0157 at V2]
		398	410	599.8594	1197.7042	1197.6718	27.1	0	73	1	U	R.LAVQLVAGGSGVK.N + [-0.0364 at C-term K]
		398	410	599.8594	1197.7043	1197.6718	27.2	0	78	1	U	R.LAVQLVAGGSGVK.N + [-0.0364 at C-term K]
		398	410	599.8599	1197.7053	1197.6718	28.0	0	77	1	U	R.LAVQLVAGGSGVK.N + [-0.0364 at C-term K]
		398	410	599.8600	1197.7054	1197.6718	28.1	0	82	1	U	R.LAVQLVAGGSGVK.N + [-0.0364 at C-term K]
		398	410	599.8601	1197.7055	1197.6718	28.2	0	77	1	U	R.LAVQLVAGGSGVK.N + [-0.0364 at C-term K]
		398	410	599.8601	1197.7057	1197.6718	28.3	0	77	1	U	R.LAVQLVAGGSGVK.N + [-0.0364 at C-term K]
		398	410	599.8602	1197.7058	1197.6718	28.4	0	78	1	U	R.LAVQLVAGGSGVK.N + [-0.0364 at C-term K]
		398	410	599.8602	1197.7059	1197.6718	28.5	0	80	1	U	R.LAVQLVAGGSGVK.N + [-0.0364 at C-term K]
		398	410	599.8603	1197.7060	1197.6718	28.6	0	84	1	U	R.LAVQLVAGGSGVK.N + [-0.0364 at C-term K]
		398	410	599.8604	1197.7061	1197.6718	28.7	0	75	1	U	R.LAVQLVAGGSGVK.N + [-0.0364 at C-term K]
		398	410	599.8604	1197.7063	1197.6718	28.8	0	75	1	U	R.LAVQLVAGGSGVK.N + [-0.0364 at C-term K]
		398	410	599.8604	1197.7063	1197.6718	28.8	0	77	1	U	R.LAVQLVAGGSGVK.N + [-0.0364 at C-term K]
		398	410	599.8605	1197.7064	1197.6718	28.9	0	80	1	U	R.LAVQLVAGGSGVK.N + [-0.0364 at C-term K]
		398	410	599.8605	1197.7065	1197.6718	29.0	0	76	1	U	R.LAVQLVAGGSGVK.N + [-0.0364 at C-term K]
		398	410	599.8606	1197.7066	1197.6718	29.1	0	72	1	U	R.LAVQLVAGGSGVK.N + [-0.0364 at C-term K]
		398	410	599.8606	1197.7066	1197.6718	29.1	0	81	1	U	R.LAVQLVAGGSGVK.N + [-0.0364 at C-term K]
		398	410	599.8607	1197.7068	1197.6718	29.2	0	74	1	U	R.LAVQLVAGGSGVK.N + [-0.0364 at C-term K]
		398	410	599.8607	1197.7068	1197.6718	29.2	0	71	1	U	R.LAVQLVAGGSGVK.N + [-0.0364 at C-term K]
		398	410	599.8607	1197.7068	1197.6718	29.2	0	73	1	U	R.LAVQLVAGGSGVK.N + [-0.0364 at C-term K]
		398	410	599.8607	1197.7068	1197.6718	29.2	0	80	1	U	R.LAVQLVAGGSGVK.N + [-0.0364 at C-term K]
		398	410	599.8607	1197.7069	1197.6718	29.3	0	74	1	U	R.LAVQLVAGGSGVK.N + [-0.0364 at C-term K]
		398	410	599.8607	1197.7069	1197.6718	29.3	0	73	1	U	R.LAVQLVAGGSGVK.N + [-0.0364 at C-term K]
		398	410	599.8607	1197.7069	1197.6718	29.3	0	78	1	U	R.LAVQLVAGGSGVK.N + [-0.0364 at C-term K]
		398	410	599.8608	1197.7070	1197.6718	29.4	0	69	1	U	R.LAVQLVAGGSGVK.N + [-0.0364 at C-term K]
		398	410	599.8608	1197.7070	1197.6718	29.4	0	75	1	U	R.LAVQLVAGGSGVK.N + [-0.0364 at C-term K]
		398	410	599.8608	1197.7070	1197.6718	29.4	0	73	1	U	R.LAVQLVAGGSGVK.N + [-0.0364 at C-term K]
		398	410	599.8608	1197.7071	1197.6718	29.5	0	93	1	U	R.LAVQLVAGGSGVK.N + [-0.0364 at C-term K]
		398	410	599.8609	1197.7072	1197.6718	29.6	0	70	1	U	R.LAVQLVAGGSGVK.N + [-0.0364 at C-term K]
		398	410	599.8610	1197.7074	1197.6718	29.7	0	71	1	U	R.LAVQLVAGGSGVK.N + [-0.0364 at C-term K]
		398	410	599.8610	1197.7074	1197.6718	29.7	0	73	1	U	R.LAVQLVAGGSGVK.N + [-0.0364 at C-term K]
		398	410	599.8610	1197.7074	1197.6718	29.7	0	74	1	U	R.LAVQLVAGGSGVK.N + [-0.0364 at C-term K]
		398	410	599.8611	1197.7076	1197.6718	29.9	0	72	1	U	R.LAVQLVAGGSGVK.N + [-0.0364 at C-term K]
		398	410	400.2432	1197.7077	1197.6718	30.0	0	36	1	U	R.LAVQLVAGGSGVK.N + [-0.0364 at C-term K]
		398	410	599.8611	1197.7077	1197.6718	30.1	0	75	1	U	R.LAVQLVAGGSGVK.N + [-0.0364 at C-term K]
		398	410	599.8612	1197.7079	1197.6718	30.2	0	80	1	U	R.LAVQLVAGGSGVK.N + [-0.0364 at C-term K]
		398	410	599.8613	1197.7080	1197.6718	30.3	0	75	1	U	R.LAVQLVAGGSGVK.N + [-0.0364 at C-term K]
		398	410	599.8613	1197.7081	1197.6718	30.4	0	74	1	U	R.LAVQLVAGGSGVK.N + [-0.0364 at C-term K]
		398	410	599.8614	1197.7082	1197.6718	30.5	0	72	1	U	R.LAVQLVAGGSGVK.N + [-0.0364 at C-term K]
		398	410	599.8614	1197.7082	1197.6718	30.5	0	77	1	U	R.LAVQLVAGGSGVK.N + [-0.0364 at C-term K]
		398	410	599.8616	1197.7086	1197.6718	30.8	0	76	1	U	R.LAVQLVAGGSGVK.N + [-0.0364 at C-term K]
		398	410	599.8616	1197.7086	1197.6718	30.8	0	75	1	U	R.LAVQLVAGGSGVK.N + [-0.0364 at C-term K]
		398	410	599.8621	1197.7097	1197.6718	31.7	0	80	1	U	R.LAVQLVAGGSGVK.N + [-0.0364 at C-term K]
		398	410	607.3594	1212.7043	1212.7078	-2.86	0	27	1	U	R.LAVQLVAGGSGVK.N + [+14.9997 at Q4]
		398	410	607.3602	1212.7059	1212.7078	-1.56	0	75	1	U	R.LAVQLVAGGSGVK.N + [+14.9997 at Q4]
		398	410	607.3604	1212.7061	1212.7078	-1.36	0	75	1	U	R.LAVQLVAGGSGVK.N + [+14.9997 at Q4]
		398	410	610.8502	1219.6858	1219.6901	-3.52	0	26	1	U	R.LAVQLVAGGSGVK.N + [+21.9819 at C-term]
		398	410	610.8506	1219.6867	1219.6901	-2.72	0	51	1	U	R.LAVQLVAGGSGVK.N + [+21.9819 at C-term]
		398	410	610.8506	1219.6867	1219.6901	-2.72	0	43	1	U	R.LAVQLVAGGSGVK.N + [+21.9819 at C-term]
		398	410	610.8508	1219.6871	1219.6901	-2.42	0	51	1	U	R.LAVQLVAGGSGVK.N + [+21.9819 at C-term]
		398	410	610.8510	1219.6875	1219.6901	-2.13	0	43	1	U	R.LAVQLVAGGSGVK.N + [+21.9819 at C-term]
		398	410	610.8525	1219.6904	1219.6901	0.28	0	32	1	U	R.LAVQLVAGGSGVK.N + [+21.9819 at C-term]
		398	410	612.8686	1223.7226	1223.7238	-0.95	0	62	1	U	R.LAVQLVAGGSGVK.N + [+26.0157 at A2]
		398	410	612.8688	1223.7230	1223.7238	-0.65	0	68	1	U	R.LAVQLVAGGSGVK.N + [+26.0157 at A2]
		398	410	612.8690	1223.7235	1223.7238	-0.24	0	61	1	U	R.LAVQLVAGGSGVK.N + [+26.0157 at A2]
		421	428	453.7103	905.4060	905.4090	-3.37	0	59	1	U	R.ATDDLDTR.L
		421	428	453.7104	905.4062	905.4090	-3.17	0	55	1	U	R.ATDDLDTR.L
		421	428	453.7105	905.4064	905.4090	-2.91	0	55	1	U	R.ATDDLDTR.L
		421	428	453.7106	905.4066	905.4090	-2.71	0	55	1	U	R.ATDDLDTR.L
		421	428	453.7106	905.4066	905.4090	-2.64	0	55	1	U	R.ATDDLDTR.L
		421	428	453.7107	905.4068	905.4090	-2.51	0	55	1	U	R.ATDDLDTR.L
		421	428	453.7111	905.4077	905.4090	-1.43	0	60	1	U	R.ATDDLDTR.L
		421	428	453.7112	905.4079	905.4090	-1.30	0	60	1	U	R.ATDDLDTR.L
		421	428	453.7113	905.4080	905.4090	-1.16	0	55	1	U	R.ATDDLDTR.L
		421	428	474.7175	947.4204	947.4196	0.89	0	65	1	U	R.ATDDLDTR.L + [+42.0106 at N-term]
		437	457	760.0675	2277.1807	2277.1529	12.2	0	79	1	U	K.GIIEPISDVYVNLVNADFTAK.Q + [-0.0364 at C-term K]
		437	457	1139.6001	2277.1856	2277.1529	14.4	0	76	1	U	K.GIIEPISDVYVNLVNADFTAK.Q + [-0.0364 at C-term K]
		437	457	1139.6002	2277.1859	2277.1529	14.5	0	45	1	U	K.GIIEPISDVYVNLVNADFTAK.Q + [-0.0364 at C-term K]
		437	457	1139.6013	2277.1881	2277.1529	15.5	0	97	1	U	K.GIIEPISDVYVNLVNADFTAK.Q + [-0.0364 at C-term K]
		437	457	1139.6019	2277.1893	2277.1529	16.0	0	73	1	U	K.GIIEPISDVYVNLVNADFTAK.Q + [-0.0364 at C-term K]
		437	457	1139.6023	2277.1900	2277.1529	16.3	0	97	1	U	K.GIIEPISDVYVNLVNADFTAK.Q + [-0.0364 at C-term K]
		437	457	760.0715	2277.1926	2277.1529	17.4	0	79	1	U	K.GIIEPISDVYVNLVNADFTAK.Q + [-0.0364 at C-term K]
		437	457	1140.1020	2278.1895	2278.1481	18.2	0	55	1	U	K.GIIEPISDVYVNLVNADFTAK.Q + [+0.9589 at I6]
		437	457	1146.6089	2291.2032	2291.1685	15.1	0	74	1	U	K.GIIEPISDVYVNLVNADFTAK.Q + [+13.9793 at P5]
		439	457	760.0704	2277.1895	2277.1317	25.4	0	65	1	U	I.IEPISDVYVNLVNADFTAK.Q + [+170.0480 at N-term]
		463	467	317.1636	632.3126	632.3129	-0.44	0	44	1	U	R.LSEER.V
		463	467	317.1636	632.3126	632.3129	-0.44	0	38	1	U	R.LSEER.V
		463	467	317.1637	632.3128	632.3129	-0.12	0	43	1	U	R.LSEER.V
		463	467	317.1638	632.3130	632.3129	0.16	0	44	1	U	R.LSEER.V
		463	467	317.1639	632.3132	632.3129	0.44	0	44	1	U	R.LSEER.V
		463	467	324.1706	646.3266	646.3286	-3.02	0	38	1	U	R.LSEER.V + [+14.0157 at E3]
		463	467	324.1706	646.3267	646.3286	-2.93	0	37	1	U	R.LSEER.V + [+14.0157 at E3]
		463	467	324.1708	646.3271	646.3286	-2.25	0	37	1	U	R.LSEER.V + [+14.0157 at E3]
		463	467	324.1711	646.3276	646.3286	-1.51	0	44	1	U	R.LSEER.V + [+14.0157 at E4]
		463	467	324.1711	646.3277	646.3286	-1.32	0	44	1	U	R.LSEER.V + [+14.0157 at E4]
		463	467	331.1787	660.3429	660.3442	-1.98	0	43	1	U	R.LSEER.V + 2 [+14.0157 at E3,E4]
		463	467	331.1789	660.3433	660.3442	-1.44	0	43	1	U	R.LSEER.V + 2 [+14.0157 at E3,E4]
		492	503	620.8044	1239.5943	1239.5619	26.2	0	76	1	U	K.FASSLSESGEVK.V + [-0.0364 at C-term K]
		492	503	620.8046	1239.5947	1239.5619	26.5	0	75	1	U	K.FASSLSESGEVK.V + [-0.0364 at C-term K]
		492	503	620.8047	1239.5948	1239.5619	26.6	0	78	1	U	K.FASSLSESGEVK.V + [-0.0364 at C-term K]
		492	503	620.8048	1239.5951	1239.5619	26.8	0	69	1	U	K.FASSLSESGEVK.V + [-0.0364 at C-term K]
		492	503	620.8049	1239.5952	1239.5619	26.9	0	80	1	U	K.FASSLSESGEVK.V + [-0.0364 at C-term K]
		492	503	620.8051	1239.5955	1239.5619	27.1	0	74	1	U	K.FASSLSESGEVK.V + [-0.0364 at C-term K]
		492	503	620.8051	1239.5955	1239.5619	27.1	0	71	1	U	K.FASSLSESGEVK.V + [-0.0364 at C-term K]
		492	503	620.8052	1239.5958	1239.5619	27.4	0	66	1	U	K.FASSLSESGEVK.V + [-0.0364 at C-term K]
		492	503	620.8052	1239.5959	1239.5619	27.4	0	74	1	U	K.FASSLSESGEVK.V + [-0.0364 at C-term K]
		492	503	620.8053	1239.5960	1239.5619	27.5	0	76	1	U	K.FASSLSESGEVK.V + [-0.0364 at C-term K]
		492	503	620.8053	1239.5960	1239.5619	27.5	0	86	1	U	K.FASSLSESGEVK.V + [-0.0364 at C-term K]
		492	503	620.8053	1239.5960	1239.5619	27.5	0	84	1	U	K.FASSLSESGEVK.V + [-0.0364 at C-term K]
		492	503	620.8054	1239.5962	1239.5619	27.6	0	72	1	U	K.FASSLSESGEVK.V + [-0.0364 at C-term K]
		492	503	620.8054	1239.5962	1239.5619	27.6	0	72	1	U	K.FASSLSESGEVK.V + [-0.0364 at C-term K]
		492	503	620.8054	1239.5962	1239.5619	27.6	0	64	1	U	K.FASSLSESGEVK.V + [-0.0364 at C-term K]
		492	503	620.8054	1239.5962	1239.5619	27.6	0	69	1	U	K.FASSLSESGEVK.V + [-0.0364 at C-term K]
		492	503	620.8055	1239.5964	1239.5619	27.8	0	46	1	U	K.FASSLSESGEVK.V + [-0.0364 at C-term K]
		492	503	620.8055	1239.5965	1239.5619	27.9	0	77	1	U	K.FASSLSESGEVK.V + [-0.0364 at C-term K]
		492	503	620.8055	1239.5965	1239.5619	27.9	0	83	1	U	K.FASSLSESGEVK.V + [-0.0364 at C-term K]
		492	503	620.8055	1239.5965	1239.5619	27.9	0	80	1	U	K.FASSLSESGEVK.V + [-0.0364 at C-term K]
		492	503	620.8056	1239.5966	1239.5619	28.0	0	85	1	U	K.FASSLSESGEVK.V + [-0.0364 at C-term K]
		492	503	620.8056	1239.5966	1239.5619	28.0	0	68	1	U	K.FASSLSESGEVK.V + [-0.0364 at C-term K]
		492	503	620.8057	1239.5969	1239.5619	28.2	0	80	1	U	K.FASSLSESGEVK.V + [-0.0364 at C-term K]
		492	503	620.8057	1239.5969	1239.5619	28.2	0	78	1	U	K.FASSLSESGEVK.V + [-0.0364 at C-term K]
		492	503	620.8058	1239.5971	1239.5619	28.4	0	70	1	U	K.FASSLSESGEVK.V + [-0.0364 at C-term K]
		492	503	620.8058	1239.5971	1239.5619	28.4	0	55	1	U	K.FASSLSESGEVK.V + [-0.0364 at C-term K]
		492	503	620.8058	1239.5971	1239.5619	28.4	0	85	1	U	K.FASSLSESGEVK.V + [-0.0364 at C-term K]
		492	503	620.8060	1239.5974	1239.5619	28.6	0	68	1	U	K.FASSLSESGEVK.V + [-0.0364 at C-term K]
		492	503	620.8061	1239.5976	1239.5619	28.8	0	69	1	U	K.FASSLSESGEVK.V + [-0.0364 at C-term K]
		492	503	620.8061	1239.5976	1239.5619	28.8	0	80	1	U	K.FASSLSESGEVK.V + [-0.0364 at C-term K]
		492	503	620.8061	1239.5976	1239.5619	28.8	0	61	1	U	K.FASSLSESGEVK.V + [-0.0364 at C-term K]
		492	503	620.8062	1239.5977	1239.5619	28.9	0	75	1	U	K.FASSLSESGEVK.V + [-0.0364 at C-term K]
		492	503	620.8062	1239.5977	1239.5619	28.9	0	74	1	U	K.FASSLSESGEVK.V + [-0.0364 at C-term K]
		492	503	620.8062	1239.5977	1239.5619	28.9	0	68	1	U	K.FASSLSESGEVK.V + [-0.0364 at C-term K]
		492	503	620.8063	1239.5981	1239.5619	29.2	0	73	1	U	K.FASSLSESGEVK.V + [-0.0364 at C-term K]
		492	503	620.8064	1239.5982	1239.5619	29.3	0	70	1	U	K.FASSLSESGEVK.V + [-0.0364 at C-term K]
		492	503	620.8064	1239.5982	1239.5619	29.3	0	41	1	U	K.FASSLSESGEVK.V + [-0.0364 at C-term K]
		492	503	620.8065	1239.5984	1239.5619	29.4	0	73	1	U	K.FASSLSESGEVK.V + [-0.0364 at C-term K]
		492	503	620.8065	1239.5985	1239.5619	29.5	0	71	1	U	K.FASSLSESGEVK.V + [-0.0364 at C-term K]
		492	503	620.8066	1239.5986	1239.5619	29.6	0	59	1	U	K.FASSLSESGEVK.V + [-0.0364 at C-term K]
		492	503	620.8066	1239.5986	1239.5619	29.6	0	63	1	U	K.FASSLSESGEVK.V + [-0.0364 at C-term K]
		492	503	620.8066	1239.5986	1239.5619	29.6	0	66	1	U	K.FASSLSESGEVK.V + [-0.0364 at C-term K]
		492	503	620.8067	1239.5988	1239.5619	29.8	0	90	1	U	K.FASSLSESGEVK.V + [-0.0364 at C-term K]
		492	503	620.8068	1239.5990	1239.5619	29.9	0	72	1	U	K.FASSLSESGEVK.V + [-0.0364 at C-term K]
		492	503	620.8068	1239.5991	1239.5619	30.0	0	35	1	U	K.FASSLSESGEVK.V + [-0.0364 at C-term K]
		492	503	620.8069	1239.5992	1239.5619	30.1	0	72	1	U	K.FASSLSESGEVK.V + [-0.0364 at C-term K]
		492	503	620.8072	1239.5998	1239.5619	30.6	0	71	1	U	K.FASSLSESGEVK.V + [-0.0364 at C-term K]
		492	503	620.8072	1239.5999	1239.5619	30.7	0	72	1	U	K.FASSLSESGEVK.V + [-0.0364 at C-term K]
		492	503	620.8075	1239.6004	1239.5619	31.1	0	74	1	U	K.FASSLSESGEVK.V + [-0.0364 at C-term K]
		492	503	620.8083	1239.6020	1239.5619	32.4	0	74	1	U	K.FASSLSESGEVK.V + [-0.0364 at C-term K]
		492	503	627.8121	1253.6097	1253.6139	-3.37	0	53	1	U	K.FASSLSESGEVK.V + [+14.0157 at E10]
		492	503	627.8122	1253.6098	1253.6139	-3.28	0	49	1	U	K.FASSLSESGEVK.V + [+14.0157 at E10]
		492	503	627.8122	1253.6098	1253.6139	-3.28	0	65	1	U	K.FASSLSESGEVK.V + [+14.0157 at S8]
		492	503	627.8126	1253.6107	1253.6139	-2.59	0	49	1	U	K.FASSLSESGEVK.V + [+14.0157 at G9]
		492	503	627.8127	1253.6109	1253.6139	-2.40	0	32	1	U	K.FASSLSESGEVK.V + [+14.0157 at E10]
		492	503	627.8129	1253.6112	1253.6139	-2.19	0	79	1	U	K.FASSLSESGEVK.V + [+14.0157 at G9]
		492	503	627.8129	1253.6112	1253.6139	-2.19	0	77	1	U	K.FASSLSESGEVK.V + [+14.0157 at S8]
		492	503	627.8130	1253.6114	1253.6139	-2.00	0	89	1	U	K.FASSLSESGEVK.V + [+14.0157 at G9]
		492	503	627.8132	1253.6119	1253.6139	-1.62	0	89	1	U	K.FASSLSESGEVK.V + [+14.0157 at G9]
		492	503	627.8133	1253.6120	1253.6139	-1.52	0	91	1	U	K.FASSLSESGEVK.V + [+14.0157 at E10]
		492	503	627.8133	1253.6120	1253.6139	-1.52	0	37	1	U	K.FASSLSESGEVK.V + [+14.0157 at S8]
		492	503	627.8134	1253.6121	1253.6139	-1.43	0	62	1	U	K.FASSLSESGEVK.V + [+14.0157 at G9]
		492	503	627.8134	1253.6123	1253.6139	-1.32	0	89	1	U	K.FASSLSESGEVK.V + [+14.0157 at E10]
		492	503	627.8135	1253.6124	1253.6139	-1.22	0	78	1	U	K.FASSLSESGEVK.V + [+14.0157 at C-term K]
		492	503	627.8136	1253.6126	1253.6139	-1.03	0	73	1	U	K.FASSLSESGEVK.V + [+14.0157 at G9]
		492	503	627.8152	1253.6159	1253.6139	1.60	0	60	1	U	K.FASSLSESGEVK.V + [+14.0157 at S8]
		492	503	631.7972	1261.5798	1261.5802	-0.34	0	38	1	U	K.FASSLSESGEVK.V + [+21.9819 at E7]
		492	503	631.7976	1261.5805	1261.5802	0.25	0	41	1	U	K.FASSLSESGEVK.V + [+21.9819 at E7]
		492	503	633.8143	1265.6140	1265.6139	0.040	0	40	1	U	K.FASSLSESGEVK.V + [+26.0157 at A2]
		508	517	365.2160	1092.6263	1092.5928	30.7	1	42	1	U	K.VKDGVPHLTK.V + [-0.0364 at C-term K]
		508	517	365.2161	1092.6264	1092.5928	30.8	1	46	1	U	K.VKDGVPHLTK.V + [-0.0364 at C-term K]
		508	517	547.3205	1092.6264	1092.5928	30.8	1	57	1	U	K.VKDGVPHLTK.V + [-0.0364 at C-term K]
		508	517	365.2161	1092.6266	1092.5928	30.9	1	46	1	U	K.VKDGVPHLTK.V + [-0.0364 at C-term K]
		508	517	547.3206	1092.6267	1092.5928	31.0	1	24	1	U	K.VKDGVPHLTK.V + [-0.0364 at C-term K]
		508	517	365.2162	1092.6267	1092.5928	31.1	1	45	1	U	K.VKDGVPHLTK.V + [-0.0364 at C-term K]
		508	517	365.2162	1092.6268	1092.5928	31.2	1	46	1	U	K.VKDGVPHLTK.V + [-0.0364 at C-term K]
		508	517	547.3207	1092.6269	1092.5928	31.3	1	63	1	U	K.VKDGVPHLTK.V + [-0.0364 at C-term K]
		508	517	365.2164	1092.6273	1092.5928	31.6	1	26	1	U	K.VKDGVPHLTK.V + [-0.0364 at C-term K]
		508	517	365.2164	1092.6273	1092.5928	31.6	1	52	1	U	K.VKDGVPHLTK.V + [-0.0364 at C-term K]
		508	517	547.3209	1092.6273	1092.5928	31.6	1	43	1	U	K.VKDGVPHLTK.V + [-0.0364 at C-term K]
		508	517	365.2166	1092.6281	1092.5928	32.3	1	38	1	U	K.VKDGVPHLTK.V + [-0.0364 at C-term K]
		510	517	433.7391	865.4637	865.4294	39.7	0	51	1	U	K.DGVPHLTK.V + [-0.0364 at C-term K]
		510	517	433.7394	865.4641	865.4658	-1.88	0	44	1	U	K.DGVPHLTK.V
		510	517	433.7394	865.4642	865.4658	-1.81	0	44	1	U	K.DGVPHLTK.V
		510	517	433.7394	865.4643	865.4658	-1.74	0	53	1	U	K.DGVPHLTK.V
		510	517	440.7467	879.4788	879.4814	-2.94	0	53	1	U	K.DGVPHLTK.V + [+14.0157 at V3]
		510	517	440.7468	879.4790	879.4814	-2.78	0	52	1	U	K.DGVPHLTK.V + [+14.0157 at V3]
		510	517	440.7468	879.4790	879.4814	-2.71	0	58	1	U	K.DGVPHLTK.V + [+14.0157 at V3]
		510	517	440.7472	879.4798	879.4814	-1.89	0	58	1	U	K.DGVPHLTK.V + [+14.0157 at V3]
		510	517	440.7472	879.4799	879.4814	-1.75	0	58	1	U	K.DGVPHLTK.V + [+14.0157 at V3]
		511	517	376.2257	750.4369	750.4388	-2.61	0	27	1	U	D.GVPHLTK.V
		511	517	376.2259	750.4372	750.4388	-2.13	0	28	1	U	D.GVPHLTK.V
		512	517	347.7153	693.4160	693.4174	-1.89	0	21	1	U	G.VPHLTK.V
		527	535	561.7925	1121.5704	1121.5573	11.7	0	35	1	U	T.LEGSIILCR.Q + [+119.0041 at C8]
		527	535	561.7925	1121.5705	1121.5573	11.8	0	31	1	U	T.LEGSIILCR.Q + [+119.0041 at C8]
		536	551	794.4050	1586.7955	1586.8338	-24.2	0	48	1	U	R.QVDQPGMIGTVGSILG.E + Oxidation (M); [+0.0364 at Q4]
		536	564	1012.8110	3035.4111	3035.5169	-34.9	0	59	1	U	R.QVDQPGMIGTVGSILGESNVNVNFMSVGR.I + 2 Oxidation (M); [-0.9476 at E17]
		536	564	1013.1509	3036.4310	3036.5009	-23.0	0	74	1	U	R.QVDQPGMIGTVGSILGESNVNVNFMSVGR.I + 2 Oxidation (M); [+0.0364 at Q4]
		536	564	1013.1616	3036.4629	3036.5009	-12.5	0	98	1	U	R.QVDQPGMIGTVGSILGESNVNVNFMSVGR.I + 2 Oxidation (M); [+0.0364 at Q4]
		536	564	1013.1632	3036.4678	3036.5009	-10.9	0	90	1	U	R.QVDQPGMIGTVGSILGESNVNVNFMSVGR.I + 2 Oxidation (M); [+0.0364 at Q4]
		536	564	1013.1633	3036.4680	3036.5009	-10.8	0	98	1	U	R.QVDQPGMIGTVGSILGESNVNVNFMSVGR.I + 2 Oxidation (M); [+0.0364 at Q4]
		536	564	1013.1636	3036.4689	3036.5009	-10.5	0	97	1	U	R.QVDQPGMIGTVGSILGESNVNVNFMSVGR.I + 2 Oxidation (M); [+0.0364 at Q4]
		536	564	1017.8176	3050.4309	3050.4802	-16.2	0	55	1	U	R.QVDQPGMIGTVGSILGESNVNVNFMSVGR.I + 2 Oxidation (M); [+14.0157 at E17]
		554	564	662.3274	1322.6402	1322.6224	13.5	0	59	1	U	S.NVNVNFMSVGR.I + [+87.0143 at N-term N]
		555	564	569.7867	1137.5589	1137.5601	-1.02	0	66	1	U	N.VNVNFMSVGR.I + Oxidation (M)
		559	564	356.6748	711.3350	711.3374	-3.39	0	30	1	U	N.FMSVGR.I + Oxidation (M)
		559	564	356.6749	711.3353	711.3374	-2.94	0	30	1	U	N.FMSVGR.I + Oxidation (M)
		569	583	529.2787	1584.8144	1584.8545	-25.3	1	47	1	U	R.KQAIMAIGVDDIPSK.E + Oxidation (M); [-15.9949 at S14]
		569	583	529.2791	1584.8155	1584.8545	-24.6	1	41	1	U	R.KQAIMAIGVDDIPSK.E + Oxidation (M); [-15.9949 at S14]
		569	583	529.2792	1584.8157	1584.8545	-24.5	1	40	1	U	R.KQAIMAIGVDDIPSK.E + Oxidation (M); [-15.9949 at S14]
		569	583	529.2793	1584.8161	1584.8545	-24.3	1	40	1	U	R.KQAIMAIGVDDIPSK.E + Oxidation (M); [-15.9949 at S14]
		569	583	529.2794	1584.8164	1584.8545	-24.0	1	37	1	U	R.KQAIMAIGVDDIPSK.E + Oxidation (M); [-15.9949 at S14]
		569	583	793.4158	1584.8171	1584.8545	-23.6	1	62	1	U	R.KQAIMAIGVDDIPSK.E + Oxidation (M); [-15.9949 at S14]
		569	583	793.4159	1584.8172	1584.8545	-23.5	1	50	1	U	R.KQAIMAIGVDDIPSK.E + Oxidation (M); [-15.9949 at S14]
		569	583	793.4159	1584.8173	1584.8545	-23.5	1	57	1	U	R.KQAIMAIGVDDIPSK.E + Oxidation (M); [-15.9949 at S14]
		569	583	793.4163	1584.8180	1584.8545	-23.1	1	64	1	U	R.KQAIMAIGVDDIPSK.E + Oxidation (M); [-15.9949 at S14]
		569	583	793.4163	1584.8181	1584.8545	-23.0	1	65	1	U	R.KQAIMAIGVDDIPSK.E + Oxidation (M); [-15.9949 at S14]
		569	583	529.2835	1584.8285	1584.8909	-39.4	1	42	1	U	R.KQAIMAIGVDDIPSK.E + Oxidation (M); [-15.9585 at D11]
		569	583	534.2830	1599.8272	1599.8654	-23.9	1	52	1	U	R.KQAIMAIGVDDIPSK.E + [+15.0109 at I12]
		569	583	808.9176	1615.8206	1615.8603	-24.6	1	98	1	U	R.KQAIMAIGVDDIPSK.E + Oxidation (M); [+15.0109 at I12]
		569	583	539.6143	1615.8211	1615.8603	-24.3	1	62	1	U	R.KQAIMAIGVDDIPSK.E + Oxidation (M); [+15.0109 at I12]
		569	583	808.9179	1615.8213	1615.8603	-24.2	1	109	1	U	R.KQAIMAIGVDDIPSK.E + Oxidation (M); [+15.0109 at I12]
		569	583	808.9179	1615.8213	1615.8603	-24.2	1	109	1	U	R.KQAIMAIGVDDIPSK.E + Oxidation (M); [+15.0109 at I12]
		569	583	808.9180	1615.8214	1615.8603	-24.1	1	94	1	U	R.KQAIMAIGVDDIPSK.E + Oxidation (M); [+15.0109 at I12]
		569	583	539.6144	1615.8215	1615.8603	-24.0	1	78	1	U	R.KQAIMAIGVDDIPSK.E + Oxidation (M); [+15.0109 at I12]
		569	583	539.6144	1615.8215	1615.8603	-24.0	1	53	1	U	R.KQAIMAIGVDDIPSK.E + Oxidation (M); [+15.0109 at I12]
		569	583	539.6145	1615.8217	1615.8603	-23.9	1	74	1	U	R.KQAIMAIGVDDIPSK.E + Oxidation (M); [+15.0109 at I12]
		569	583	539.6145	1615.8217	1615.8603	-23.9	1	86	1	U	R.KQAIMAIGVDDIPSK.E + Oxidation (M); [+15.0109 at I12]
		569	583	808.9182	1615.8219	1615.8603	-23.8	1	128	1	U	R.KQAIMAIGVDDIPSK.E + Oxidation (M); [+15.0109 at I12]
		569	583	539.6146	1615.8220	1615.8603	-23.7	1	74	1	U	R.KQAIMAIGVDDIPSK.E + Oxidation (M); [+15.0109 at I12]
		569	583	539.6146	1615.8220	1615.8603	-23.7	1	86	1	U	R.KQAIMAIGVDDIPSK.E + Oxidation (M); [+15.0109 at I12]
		569	583	539.6146	1615.8220	1615.8603	-23.7	1	83	1	U	R.KQAIMAIGVDDIPSK.E + Oxidation (M); [+15.0109 at I12]
		569	583	808.9184	1615.8222	1615.8603	-23.6	1	98	1	U	R.KQAIMAIGVDDIPSK.E + Oxidation (M); [+15.0109 at I12]
		569	583	539.6147	1615.8224	1615.8603	-23.5	1	83	1	U	R.KQAIMAIGVDDIPSK.E + Oxidation (M); [+15.0109 at I12]
		569	583	808.9186	1615.8227	1615.8603	-23.3	1	113	1	U	R.KQAIMAIGVDDIPSK.E + Oxidation (M); [+15.0109 at I12]
		569	583	808.9186	1615.8227	1615.8603	-23.3	1	99	1	U	R.KQAIMAIGVDDIPSK.E + Oxidation (M); [+15.0109 at I12]
		569	583	539.6149	1615.8228	1615.8603	-23.2	1	82	1	U	R.KQAIMAIGVDDIPSK.E + Oxidation (M); [+15.0109 at I12]
		569	583	539.6149	1615.8228	1615.8603	-23.2	1	76	1	U	R.KQAIMAIGVDDIPSK.E + Oxidation (M); [+15.0109 at I12]
		569	583	539.6149	1615.8230	1615.8603	-23.1	1	60	1	U	R.KQAIMAIGVDDIPSK.E + Oxidation (M); [+15.0109 at I12]
		569	583	539.6150	1615.8233	1615.8603	-22.9	1	81	1	U	R.KQAIMAIGVDDIPSK.E + Oxidation (M); [+15.0109 at I12]
		569	583	539.9435	1616.8088	1616.8443	-22.0	1	36	1	U	R.KQAIMAIGVDDIPSK.E + Oxidation (M); [+15.9949 at D11]
		569	583	816.4172	1630.8199	1630.8236	-2.26	1	61	1	U	R.KQAIMAIGVDDIPSK.E + Oxidation (M); [+29.9742 at V9]
		569	583	544.6141	1630.8206	1630.8236	-1.85	1	49	1	U	R.KQAIMAIGVDDIPSK.E + Oxidation (M); [+29.9742 at V9]
		569	583	816.4193	1630.8241	1630.8236	0.28	1	59	1	U	R.KQAIMAIGVDDIPSK.E + Oxidation (M); [+29.9742 at V9]
		570	583	721.3687	1440.7227	1440.7646	-29.1	0	71	1	U	K.QAIMAIGVDDIPSK.E + [-15.9949 at S13]
		570	583	721.3693	1440.7240	1440.7646	-28.2	0	71	1	U	K.QAIMAIGVDDIPSK.E + [-15.9949 at S13]
		570	583	721.3702	1440.7258	1440.7646	-27.0	0	71	1	U	K.QAIMAIGVDDIPSK.E + [-15.9949 at S13]
		570	583	721.3702	1440.7259	1440.7646	-26.9	0	83	1	U	K.QAIMAIGVDDIPSK.E + [-15.9949 at S13]
		570	583	729.3678	1456.7210	1456.7596	-26.4	0	58	1	U	K.QAIMAIGVDDIPSK.E + Oxidation (M); [-15.9949 at S13]
		570	583	729.3680	1456.7215	1456.7596	-26.1	0	37	1	U	K.QAIMAIGVDDIPSK.E + Oxidation (M); [-15.9949 at S13]
		570	583	729.3682	1456.7219	1456.7596	-25.9	0	67	1	U	K.QAIMAIGVDDIPSK.E + Oxidation (M); [-15.9949 at S13]
		570	583	736.8724	1471.7302	1471.7704	-27.3	0	84	1	U	K.QAIMAIGVDDIPSK.E + [+15.0109 at I11]
		570	583	736.8726	1471.7306	1471.7704	-27.1	0	84	1	U	K.QAIMAIGVDDIPSK.E + [+15.0109 at I11]
		570	583	736.8753	1471.7361	1471.7704	-23.4	0	69	1	U	K.QAIMAIGVDDIPSK.E + [+15.0109 at I11]
		570	583	744.3683	1486.7220	1486.7337	-7.87	0	43	1	U	K.QAIMAIGVDDIPSK.E + [+29.9742 at V8]
		570	583	744.8697	1487.7249	1487.7654	-27.2	0	81	1	U	K.QAIMAIGVDDIPSK.E + Oxidation (M); [+15.0109 at I11]
		570	583	744.8707	1487.7269	1487.7654	-25.8	0	88	1	U	K.QAIMAIGVDDIPSK.E + Oxidation (M); [+15.0109 at I11]
		570	583	744.8709	1487.7273	1487.7654	-25.6	0	79	1	U	K.QAIMAIGVDDIPSK.E + Oxidation (M); [+15.0109 at I11]
		570	583	744.8713	1487.7280	1487.7654	-25.1	0	78	1	U	K.QAIMAIGVDDIPSK.E + Oxidation (M); [+15.0109 at I11]
		570	583	745.3633	1488.7120	1488.7494	-25.1	0	56	1	U	K.QAIMAIGVDDIPSK.E + Oxidation (M); [+15.9949 at D10]
		570	583	745.3637	1488.7127	1488.7494	-24.6	0	78	1	U	K.QAIMAIGVDDIPSK.E + Oxidation (M); [+15.9949 at D10]
		570	583	745.3637	1488.7127	1488.7494	-24.6	0	71	1	U	K.QAIMAIGVDDIPSK.E + Oxidation (M); [+15.9949 at D10]
		570	583	752.3709	1502.7271	1502.7287	-1.00	0	46	1	U	K.QAIMAIGVDDIPSK.E + Oxidation (M); [+29.9742 at V8]
		570	583	752.3710	1502.7274	1502.7287	-0.84	0	39	1	U	K.QAIMAIGVDDIPSK.E + Oxidation (M); [+29.9742 at V8]
		570	583	504.5780	1510.7122	1510.7104	1.20	0	29	1	U	K.QAIMAIGVDDIPSK.E + Oxidation (M); [+37.9559 at D10]
		570	583	765.3853	1528.7561	1528.7807	-16.1	0	39	1	U	K.QAIMAIGVDDIPSK.E + Oxidation (M); [+56.0262 at C-term K]
		570	587	654.3345	1959.9816	1960.0187	-18.9	1	72	1	U	K.QAIMAIGVDDIPSKETLK.K + Oxidation (M); [+15.9949 at P12]
		574	583	515.2632	1028.5118	1028.5502	-37.3	0	64	1	U	M.AIGVDDIPSK.E + [+15.0109 at I7]
		574	583	515.2633	1028.5121	1028.5502	-37.1	0	64	1	U	M.AIGVDDIPSK.E + [+15.0109 at I7]
		574	583	515.2637	1028.5128	1028.5502	-36.4	0	56	1	U	M.AIGVDDIPSK.E + [+15.0109 at I7]
		574	583	515.7551	1029.4956	1029.5342	-37.5	0	58	1	U	M.AIGVDDIPSK.E + [+15.9949 at D6]
		574	583	515.7551	1029.4957	1029.5342	-37.4	0	40	1	U	M.AIGVDDIPSK.E + [+15.9949 at D6]
		574	583	515.7553	1029.4961	1029.5342	-37.1	0	41	1	U	M.AIGVDDIPSK.E + [+15.9949 at D6]
		574	587	751.3932	1500.7719	1500.8035	-21.0	1	61	1	U	M.AIGVDDIPSKETLK.K + [+15.9949 at P8]
		584	588	309.6946	617.3746	617.3748	-0.31	1	44	1	U	K.ETLKK.I
		584	588	309.6946	617.3747	617.3748	-0.22	1	40	1	U	K.ETLKK.I
		584	588	309.6947	617.3748	617.3748	0.075	1	44	1	U	K.ETLKK.I
		584	588	309.6947	617.3748	617.3748	0.075	1	37	1	U	K.ETLKK.I
		584	588	309.6948	617.3750	617.3748	0.27	1	44	1	U	K.ETLKK.I
		584	588	309.6948	617.3750	617.3748	0.37	1	40	1	U	K.ETLKK.I
		584	588	309.6948	617.3751	617.3748	0.46	1	39	1	U	K.ETLKK.I
		584	588	309.6948	617.3751	617.3748	0.56	1	40	1	U	K.ETLKK.I
		584	588	309.6948	617.3751	617.3748	0.56	1	37	1	U	K.ETLKK.I
		584	588	309.6949	617.3752	617.3748	0.69	1	44	1	U	K.ETLKK.I
		584	588	309.6949	617.3752	617.3748	0.69	1	40	1	U	K.ETLKK.I
		584	588	309.6949	617.3752	617.3748	0.69	1	39	1	U	K.ETLKK.I
		584	588	309.6950	617.3753	617.3748	0.88	1	40	1	U	K.ETLKK.I
		584	588	309.6951	617.3756	617.3748	1.27	1	36	1	U	K.ETLKK.I
		588	602	573.6632	1717.9678	1717.9291	22.6	1	34	1	U	K.KIGEIPAVEEFVFLK.L + [-0.0364 at C-term K]
		589	602	795.9424	1589.8702	1589.8341	22.7	0	34	1	U	K.IGEIPAVEEFVFLK.L + [-0.0364 at C-term K]
		589	602	802.9467	1603.8789	1603.8861	-4.52	0	41	1	U	K.IGEIPAVEEFVFLK.L + [+14.0157 at V7]
		589	602	535.6352	1603.8837	1603.8861	-1.49	0	35	1	U	K.IGEIPAVEEFVFLK.L + [+14.0157 at V7]
		589	602	802.9495	1603.8844	1603.8861	-1.10	0	29	1	U	K.IGEIPAVEEFVFLK.L + [+14.0157 at E8]
		589	602	540.3070	1617.8992	1617.9018	-1.60	0	52	1	U	K.IGEIPAVEEFVFLK.L + 2 [+14.0157 at E3,E8]
		591	602	701.8839	1401.7531	1401.7544	-0.89	0	52	1	U	G.EIPAVEEFVFLK.L + [-18.0106 at N-term]
9	gi|15235282	2	16	499.1983	1494.5731	1494.6004	-18.3	0	30	1	U	M.SATAAASSSIAVATN.S + 2 Phospho (ST); [+14.0157 at I10]
		53	69	607.6376	1819.8909	1819.8986	-4.24	0	31	1	U	V.SCSTGDGSKPTILVAEK.L + Carbamidomethyl (K); [+14.0157 at S3]
		54	69	862.9207	1723.8269	1723.7852	24.2	0	45	1	U	S.CSTGDGSKPTILVAEK.L + Phospho (ST); [-18.0106 at N-term]
		55	69	743.9073	1485.8001	1485.8039	-2.51	0	84	1	U	C.STGDGSKPTILVAEK.L + [-15.9949 at N-term S]
		55	69	773.8997	1545.7848	1545.8072	-14.5	0	34	1	U	C.STGDGSKPTILVAEK.L + [+44.0085 at N-term S]
		55	69	779.9006	1557.7866	1557.7886	-1.30	0	36	1	U	C.STGDGSKPTILVAEK.L + 2 [+27.9949 at S1,S6]
		55	69	525.2849	1572.8327	1572.8359	-2.03	0	28	1	U	C.STGDGSKPTILVAEK.L + Carbamidomethyl (K); [+14.0157 at T2]
		55	69	787.4237	1572.8329	1572.8359	-1.93	0	28	1	U	C.STGDGSKPTILVAEK.L + Carbamidomethyl (K); [+14.0157 at N-term S]
		55	69	787.4240	1572.8335	1572.8359	-1.55	0	29	1	U	C.STGDGSKPTILVAEK.L + Carbamidomethyl (K); [+14.0157 at N-term S]
		55	69	525.2852	1572.8338	1572.8359	-1.32	0	28	1	U	C.STGDGSKPTILVAEK.L + Carbamidomethyl (K); [+14.0157 at T2]
		55	69	787.4243	1572.8341	1572.8359	-1.16	0	35	1	U	C.STGDGSKPTILVAEK.L + Carbamidomethyl (K); [+14.0157 at T2]
		55	69	787.4244	1572.8343	1572.8359	-1.00	0	28	1	U	C.STGDGSKPTILVAEK.L + Carbamidomethyl (K); [+14.0157 at N-term S]
		55	69	787.4254	1572.8363	1572.8359	0.24	0	33	1	U	C.STGDGSKPTILVAEK.L + Carbamidomethyl (K); [+14.0157 at T2]
		55	69	800.4264	1598.8382	1598.7996	24.2	0	28	1	U	C.STGDGSKPTILVAEK.L + Phospho (ST); [+17.0345 at D4]
		55	69	805.4262	1608.8377	1608.7760	38.4	0	40	1	U	C.STGDGSKPTILVAEK.L + Phospho (ST); Carbamidomethyl (K); [-30.0106 at S6]
		55	69	808.4283	1614.8420	1614.8101	19.8	0	30	1	U	C.STGDGSKPTILVAEK.L + Carbamidomethyl (K); 2 [+27.9949 at S1,S6]
		55	69	808.4290	1614.8434	1614.8465	-1.92	0	44	1	U	C.STGDGSKPTILVAEK.L + Carbamidomethyl (K); [+56.0262 at N-term]
		55	69	811.4077	1620.8009	1620.8359	-21.6	0	62	1	U	C.STGDGSKPTILVAEK.L + [+119.0371 at N-term]
		55	69	542.5917	1624.7534	1624.7709	-10.8	0	30	1	U	C.STGDGSKPTILVAEK.L + Phospho (ST); [+43.0058 at N-term]
		55	69	542.9225	1625.7456	1625.7736	-17.2	0	34	1	U	C.STGDGSKPTILVAEK.L + Phospho (ST); [+44.0085 at N-term S]
		55	69	542.9228	1625.7465	1625.7736	-16.6	0	36	1	U	C.STGDGSKPTILVAEK.L + Phospho (ST); [+44.0085 at N-term S]
		55	69	816.4271	1630.8396	1630.8566	-10.5	0	37	1	U	C.STGDGSKPTILVAEK.L + [+129.0578 at G3]
		55	69	819.4040	1636.7935	1636.8185	-15.3	0	74	1	U	C.STGDGSKPTILVAEK.L + Phospho (ST); [+55.0534 at T2]
		55	69	819.4042	1636.7939	1636.8185	-15.0	0	76	1	U	C.STGDGSKPTILVAEK.L + Phospho (ST); [+55.0534 at T2]
		55	69	819.4044	1636.7943	1636.8185	-14.8	0	78	1	U	C.STGDGSKPTILVAEK.L + Phospho (ST); [+55.0534 at T2]
		55	69	819.4049	1636.7951	1636.8185	-14.3	0	75	1	U	C.STGDGSKPTILVAEK.L + Phospho (ST); [+55.0534 at T2]
		55	69	819.4050	1636.7955	1636.8185	-14.1	0	85	1	U	C.STGDGSKPTILVAEK.L + Phospho (ST); [+55.0534 at T2]
		55	69	819.4052	1636.7959	1636.8185	-13.9	0	82	1	U	C.STGDGSKPTILVAEK.L + Phospho (ST); [+55.0534 at T2]
		55	69	819.4056	1636.7966	1636.8185	-13.4	0	88	1	U	C.STGDGSKPTILVAEK.L + Phospho (ST); [+55.0534 at T2]
		55	69	819.4058	1636.7971	1636.8185	-13.1	0	82	1	U	C.STGDGSKPTILVAEK.L + Phospho (ST); [+55.0534 at T2]
		55	69	548.6346	1642.8819	1642.8414	24.7	0	32	1	U	C.STGDGSKPTILVAEK.L + Carbamidomethyl (K); 2 [+42.0106 at S1,S6]
		55	69	830.3950	1658.7754	1658.8363	-36.7	0	38	1	U	C.STGDGSKPTILVAEK.L + Carbamidomethyl (K); [+100.0160 at N-term]
		56	69	736.9000	1471.7854	1471.7882	-1.93	0	84	1	U	S.TGDGSKPTILVAEK.L + [+57.0215 at N-term]
		56	69	491.6024	1471.7854	1471.7882	-1.89	0	51	1	U	S.TGDGSKPTILVAEK.L + [+57.0215 at N-term]
		56	69	736.9004	1471.7862	1471.7882	-1.35	0	80	1	U	S.TGDGSKPTILVAEK.L + [+57.0215 at N-term]
		56	69	496.2746	1485.8020	1485.8039	-1.28	0	36	1	U	S.TGDGSKPTILVAEK.L + Carbamidomethyl (K); [+14.0157 at G2]
		56	69	756.8980	1511.7815	1511.7676	9.20	0	62	1	U	S.TGDGSKPTILVAEK.L + Phospho (ST); [+17.0345 at D3]
		56	69	510.6108	1528.8106	1528.7962	9.43	0	42	1	U	S.TGDGSKPTILVAEK.L + Phospho (ST); [+34.0631 at N-term]
		56	69	772.8895	1543.7645	1543.8094	-29.1	0	44	1	U	S.TGDGSKPTILVAEK.L + Carbamidomethyl (K); [+72.0211 at G4]
		56	69	778.4185	1554.8224	1554.7695	34.0	0	45	1	U	S.TGDGSKPTILVAEK.L + Phospho (ST); [+60.0364 at S5]
		56	69	519.2817	1554.8232	1554.8617	-24.8	0	40	1	U	S.TGDGSKPTILVAEK.L + [+140.0950 at N-term]
		56	69	778.4197	1554.8248	1554.8617	-23.7	0	46	1	U	S.TGDGSKPTILVAEK.L + [+140.0950 at N-term]
		56	69	778.9099	1555.8053	1555.8651	-38.4	0	57	1	U	S.TGDGSKPTILVAEK.L + [+141.0983 at N-term]
		56	69	778.9118	1555.8090	1555.8651	-36.0	0	63	1	U	S.TGDGSKPTILVAEK.L + [+141.0983 at N-term]
		56	69	787.4215	1572.8283	1572.7800	30.7	0	33	1	U	S.TGDGSKPTILVAEK.L + Phospho (ST); [+78.0469 at K6]
		56	69	787.4248	1572.8350	1572.7800	35.0	0	28	1	U	S.TGDGSKPTILVAEK.L + Phospho (ST); [+78.0469 at K6]
		56	69	525.2860	1572.8362	1572.7800	35.7	0	30	1	U	S.TGDGSKPTILVAEK.L + Phospho (ST); [+78.0469 at K6]
		56	69	787.4319	1572.8492	1572.8974	-30.7	0	33	1	U	S.TGDGSKPTILVAEK.L + [+158.1307 at K6]
		56	69	800.4115	1598.8084	1598.7742	21.4	0	35	1	U	S.TGDGSKPTILVAEK.L + Phospho (ST); [+104.0412 at N-term]
		56	69	548.9628	1643.8667	1643.9297	-38.3	0	43	1	U	S.TGDGSKPTILVAEK.L + [+229.1629 at N-term]
		56	69	548.9631	1643.8674	1643.9297	-37.9	0	51	1	U	S.TGDGSKPTILVAEK.L + [+229.1629 at N-term]
		56	69	567.9847	1700.9324	1700.9512	-11.0	0	27	1	U	S.TGDGSKPTILVAEK.L + Carbamidomethyl (K); [+229.1629 at N-term]
		57	69	672.8710	1343.7274	1343.7296	-1.67	0	59	1	U	T.GDGSKPTILVAEK.L + [+30.0106 at G3]
		57	69	672.8710	1343.7274	1343.7296	-1.67	0	57	1	U	T.GDGSKPTILVAEK.L + [+30.0106 at G3]
		57	69	672.8711	1343.7276	1343.7296	-1.49	0	49	1	U	T.GDGSKPTILVAEK.L + [+30.0106 at G3]
		57	69	672.8712	1343.7279	1343.7296	-1.30	0	46	1	U	T.GDGSKPTILVAEK.L + [+30.0106 at G3]
		57	69	672.8715	1343.7284	1343.7296	-0.94	0	65	1	U	T.GDGSKPTILVAEK.L + [+30.0106 at G3]
		57	69	692.3747	1382.7348	1382.7881	-38.6	0	56	1	U	T.GDGSKPTILVAEK.L + [+69.0691 at S4]
		57	69	467.9232	1400.7478	1400.7697	-15.6	0	49	1	U	T.GDGSKPTILVAEK.L + [+87.0507 at S4]
		57	69	467.9235	1400.7487	1400.7875	-27.7	0	51	1	U	T.GDGSKPTILVAEK.L + [+87.0684 at K5]
		57	69	764.8951	1527.7757	1527.7334	27.7	0	45	1	U	T.GDGSKPTILVAEK.L + Phospho (ST); [+134.0480 at N-term]
		57	69	764.8952	1527.7758	1527.7334	27.8	0	33	1	U	T.GDGSKPTILVAEK.L + Phospho (ST); [+134.0480 at N-term]
		58	69	661.3658	1320.7170	1320.7054	8.78	0	26	1	U	G.DGSKPTILVAEK.L + Phospho (ST); [-15.9585 at N-term D]
		58	69	448.9162	1343.7268	1343.7483	-16.0	0	58	1	U	G.DGSKPTILVAEK.L + [+87.0507 at S3]
		58	69	701.3814	1400.7483	1400.7697	-15.3	0	42	1	U	G.DGSKPTILVAEK.L + Carbamidomethyl (K); [+87.0507 at T6]
		58	69	701.3812	1400.7479	1400.7972	-35.2	0	45	1	U	G.DGSKPTILVAEK.L + [+144.0996 at N-term]
		58	69	701.3815	1400.7485	1400.7972	-34.8	0	40	1	U	G.DGSKPTILVAEK.L + [+144.0996 at N-term]
		58	69	701.3816	1400.7486	1400.7972	-34.7	0	45	1	U	G.DGSKPTILVAEK.L + [+144.0996 at N-term]
		58	69	701.3818	1400.7490	1400.7972	-34.4	0	67	1	U	G.DGSKPTILVAEK.L + [+144.0996 at N-term]
		58	69	519.2838	1554.8296	1554.8310	-0.90	0	28	1	U	G.DGSKPTILVAEK.L + Phospho (ST); [+218.1671 at K4]
		58	69	805.4262	1608.8379	1608.8545	-10.3	0	43	1	U	G.DGSKPTILVAEK.L + [+352.1569 at K4]
		59	69	586.8463	1171.6779	1171.6812	-2.79	0	62	1	U	D.GSKPTILVAEK.L + [+30.0106 at N-term G]
		59	69	586.8469	1171.6793	1171.6812	-1.64	0	65	1	U	D.GSKPTILVAEK.L + [+30.0106 at N-term G]
		59	69	615.3569	1228.6992	1228.7213	-18.0	0	62	1	U	D.GSKPTILVAEK.L + [+87.0507 at S2]
		59	69	410.5737	1228.6994	1228.7391	-32.3	0	52	1	U	D.GSKPTILVAEK.L + [+87.0684 at K3]
		59	69	410.5741	1228.7005	1228.7391	-31.4	0	52	1	U	D.GSKPTILVAEK.L + [+87.0684 at K3]
		59	69	615.3586	1228.7026	1228.7391	-29.7	0	47	1	U	D.GSKPTILVAEK.L + [+87.0684 at K3]
		60	69	615.3572	1228.6999	1228.7488	-39.8	0	62	1	U	G.SKPTILVAEK.L + [+144.0996 at N-term]
		61	69	543.3307	1084.6469	1084.6856	-35.6	0	45	1	U	S.KPTILVAEK.L + [+87.0684 at N-term K]
		61	69	543.3311	1084.6475	1084.6856	-35.1	0	39	1	U	S.KPTILVAEK.L + [+87.0684 at N-term K]
		62	69	435.7667	869.5188	869.4858	37.9	0	65	1	U	K.PTILVAEK.L + [-0.0364 at C-term K]
		62	69	435.7668	869.5189	869.4858	38.1	0	65	1	U	K.PTILVAEK.L + [-0.0364 at C-term K]
		62	69	435.7674	869.5202	869.4858	39.6	0	62	1	U	K.PTILVAEK.L + [-0.0364 at C-term K]
		63	69	441.7672	881.5199	881.5160	4.45	0	40	1	U	P.TILVAEK.L + [+109.0466 at N-term]
		63	69	441.7673	881.5201	881.5160	4.65	0	47	1	U	P.TILVAEK.L + [+109.0466 at N-term]
		77	82	317.1636	632.3126	632.3017	17.3	0	37	1	U	K.LLEDVA.N + [-26.0520 at L2]
		82	98	993.4315	1984.8484	1984.8506	-1.13	0	90	1	U	V.ANVDCSYNMTPEELNIK.I + [-12.0364 at I16]
		82	98	993.4318	1984.8491	1984.8506	-0.77	0	90	1	U	V.ANVDCSYNMTPEELNIK.I + [-12.0364 at I16]
		82	98	993.4320	1984.8493	1984.8506	-0.64	0	78	1	U	V.ANVDCSYNMTPEELNIK.I + [-12.0364 at I16]
		82	98	1001.4289	2000.8432	2000.8455	-1.15	0	89	1	U	V.ANVDCSYNMTPEELNIK.I + Oxidation (M); [-12.0364 at I16]
		82	98	1001.4290	2000.8435	2000.8455	-1.02	0	89	1	U	V.ANVDCSYNMTPEELNIK.I + Oxidation (M); [-12.0364 at I16]
		82	98	1008.4363	2014.8580	2014.8862	-14.0	0	38	1	U	V.ANVDCSYNMTPEELNIK.I + Oxidation (M); [+2.0042 at C-term]
		82	98	1008.4370	2014.8595	2014.8862	-13.2	0	31	1	U	V.ANVDCSYNMTPEELNIK.I + Oxidation (M); [+2.0042 at C-term]
		84	98	908.8889	1815.7631	1815.7655	-1.30	0	74	1	U	N.VDCSYNMTPEELNIK.I + Oxidation (M); [-12.0364 at I14]
		84	98	908.8898	1815.7651	1815.7655	-0.22	0	80	1	U	N.VDCSYNMTPEELNIK.I + Oxidation (M); [-12.0364 at I14]
		84	98	915.8967	1829.7788	1829.8061	-14.9	0	53	1	U	N.VDCSYNMTPEELNIK.I + Oxidation (M); [+2.0042 at C-term]
		86	98	801.8408	1601.6671	1601.6701	-1.90	0	81	1	U	D.CSYNMTPEELNIK.I + Oxidation (M); [-12.0364 at I12]
		87	98	721.8255	1441.6364	1441.6395	-2.10	0	70	1	U	C.SYNMTPEELNIK.I + Oxidation (M); [-12.0364 at I11]
		89	98	596.7778	1191.5410	1191.5441	-2.64	0	54	1	U	Y.NMTPEELNIK.I + Oxidation (M); [-12.0364 at I9]
		89	98	603.7859	1205.5573	1205.5847	-22.7	0	28	1	U	Y.NMTPEELNIK.I + Oxidation (M); [+2.0042 at C-term]
		89	98	603.7860	1205.5575	1205.5847	-22.6	0	31	1	U	Y.NMTPEELNIK.I + Oxidation (M); [+2.0042 at C-term]
		90	98	531.7595	1061.5045	1061.5063	-1.69	0	37	1	U	N.MTPEELNIK.I + [-12.0364 at I8]
		90	98	539.7560	1077.4975	1077.5012	-3.41	0	48	1	U	N.MTPEELNIK.I + Oxidation (M); [-12.0364 at I8]
		90	98	539.7561	1077.4976	1077.5012	-3.30	0	47	1	U	N.MTPEELNIK.I + Oxidation (M); [-12.0364 at I8]
		90	98	539.7562	1077.4978	1077.5012	-3.19	0	46	1	U	N.MTPEELNIK.I + Oxidation (M); [-12.0364 at I8]
		90	98	539.7563	1077.4981	1077.5012	-2.84	0	38	1	U	N.MTPEELNIK.I + Oxidation (M); [-12.0364 at I8]
		91	98	466.2388	930.4630	930.4658	-3.03	0	26	1	U	M.TPEELNIK.I + [-12.0364 at I7]
		91	98	466.2388	930.4630	930.4658	-2.96	0	41	1	U	M.TPEELNIK.I + [-12.0364 at I7]
		99	108	580.3259	1158.6372	1158.6431	-5.07	0	82	1	U	K.ISLCDALIVR.S
		99	108	580.3261	1158.6375	1158.6431	-4.76	0	77	1	U	K.ISLCDALIVR.S
		99	108	580.3261	1158.6377	1158.6431	-4.66	0	82	1	U	K.ISLCDALIVR.S
		99	108	580.3261	1158.6377	1158.6431	-4.66	0	64	1	U	K.ISLCDALIVR.S
		99	108	580.3264	1158.6381	1158.6431	-4.24	0	72	1	U	K.ISLCDALIVR.S
		99	108	580.3264	1158.6383	1158.6431	-4.12	0	82	1	U	K.ISLCDALIVR.S
		99	108	580.3267	1158.6389	1158.6431	-3.61	0	77	1	U	K.ISLCDALIVR.S
		99	108	580.3267	1158.6389	1158.6431	-3.61	0	72	1	U	K.ISLCDALIVR.S
		99	108	580.3267	1158.6389	1158.6431	-3.61	0	67	1	U	K.ISLCDALIVR.S
		99	108	580.3268	1158.6390	1158.6431	-3.50	0	70	1	U	K.ISLCDALIVR.S
		99	108	580.3269	1158.6392	1158.6431	-3.30	0	82	1	U	K.ISLCDALIVR.S
		99	108	580.3270	1158.6394	1158.6431	-3.17	0	77	1	U	K.ISLCDALIVR.S
		99	108	580.3270	1158.6394	1158.6431	-3.17	0	78	1	U	K.ISLCDALIVR.S
		99	108	580.3271	1158.6396	1158.6431	-2.97	0	83	1	U	K.ISLCDALIVR.S
		99	108	580.3271	1158.6397	1158.6431	-2.86	0	76	1	U	K.ISLCDALIVR.S
		99	108	580.3272	1158.6399	1158.6431	-2.76	0	82	1	U	K.ISLCDALIVR.S
		99	108	580.3272	1158.6399	1158.6431	-2.76	0	73	1	U	K.ISLCDALIVR.S
		99	108	580.3272	1158.6399	1158.6431	-2.76	0	82	1	U	K.ISLCDALIVR.S
		99	108	580.3273	1158.6400	1158.6431	-2.66	0	73	1	U	K.ISLCDALIVR.S
		99	108	580.3273	1158.6401	1158.6431	-2.55	0	72	1	U	K.ISLCDALIVR.S
		99	108	580.3274	1158.6402	1158.6431	-2.45	0	77	1	U	K.ISLCDALIVR.S
		99	108	580.3274	1158.6403	1158.6431	-2.35	0	69	1	U	K.ISLCDALIVR.S
		99	108	580.3276	1158.6406	1158.6431	-2.12	0	77	1	U	K.ISLCDALIVR.S
		99	108	580.3276	1158.6406	1158.6431	-2.12	0	82	1	U	K.ISLCDALIVR.S
		99	108	580.3276	1158.6407	1158.6431	-2.02	0	72	1	U	K.ISLCDALIVR.S
		99	108	580.3276	1158.6407	1158.6431	-2.02	0	77	1	U	K.ISLCDALIVR.S
		99	108	580.3277	1158.6408	1158.6431	-1.91	0	77	1	U	K.ISLCDALIVR.S
		99	108	580.3278	1158.6410	1158.6431	-1.81	0	82	1	U	K.ISLCDALIVR.S
		99	108	580.3278	1158.6411	1158.6431	-1.71	0	83	1	U	K.ISLCDALIVR.S
		99	108	580.3279	1158.6412	1158.6431	-1.60	0	66	1	U	K.ISLCDALIVR.S
		99	108	580.3279	1158.6412	1158.6431	-1.60	0	76	1	U	K.ISLCDALIVR.S
		99	108	580.3279	1158.6412	1158.6431	-1.60	0	77	1	U	K.ISLCDALIVR.S
		99	108	580.3279	1158.6412	1158.6431	-1.60	0	82	1	U	K.ISLCDALIVR.S
		99	108	580.3279	1158.6413	1158.6431	-1.50	0	58	1	U	K.ISLCDALIVR.S
		99	108	580.3279	1158.6413	1158.6431	-1.50	0	82	1	U	K.ISLCDALIVR.S
		99	108	580.3280	1158.6414	1158.6431	-1.40	0	61	1	U	K.ISLCDALIVR.S
		99	108	580.3281	1158.6416	1158.6431	-1.29	0	69	1	U	K.ISLCDALIVR.S
		99	108	580.3282	1158.6418	1158.6431	-1.07	0	67	1	U	K.ISLCDALIVR.S
		99	108	580.3283	1158.6419	1158.6431	-0.96	0	82	1	U	K.ISLCDALIVR.S
		99	108	580.3283	1158.6421	1158.6431	-0.86	0	59	1	U	K.ISLCDALIVR.S
		99	108	580.3289	1158.6432	1158.6431	0.088	0	70	1	U	K.ISLCDALIVR.S
		99	108	580.3290	1158.6434	1158.6431	0.30	0	60	1	U	K.ISLCDALIVR.S
		99	108	580.3292	1158.6438	1158.6431	0.61	0	70	1	U	K.ISLCDALIVR.S
		99	108	580.3297	1158.6447	1158.6431	1.45	0	50	1	U	K.ISLCDALIVR.S
		99	108	588.3257	1174.6368	1174.6202	14.1	0	29	1	U	K.ISLCDALIVR.S + [+15.9772 at S2]
		99	108	588.3257	1174.6369	1174.6202	14.2	0	29	1	U	K.ISLCDALIVR.S + [+15.9772 at S2]
		99	108	399.8692	1196.5858	1196.5990	-11.0	0	36	1	U	K.ISLCDALIVR.S + [+37.9559 at D5]
		125	130	350.2282	698.4419	698.4439	-2.84	1	38	1	U	R.LKVVGR.A + [+27.9949 at K2]
		131	141	564.8044	1127.5943	1127.5935	0.74	0	77	1	U	R.AGVGIDNVDLS.A + [+69.0691 at C-term S]
		131	156	899.7619	2696.2639	2696.2769	-4.82	0	37	1	U	R.AGVGIDNVDLSAATEFGCLVVNAPTA.N + [+136.0289 at T25]
		131	157	892.7749	2675.3029	2675.2749	10.5	0	76	1	U	R.AGVGIDNVDLSAATEFGCLVVNAPTAN.T + [+58.0055 at C18]
		131	157	897.7691	2690.2855	2690.2858	-0.12	0	38	1	U	R.AGVGIDNVDLSAATEFGCLVVNAPTAN.T + [+15.9949 at N22]
		158	174	561.3055	1680.8946	1680.8981	-2.07	0	31	1	U	N.TIAAAEHGIALMAAMAR.N + Oxidation (M); [-31.9721 at M12]
		158	174	561.3057	1680.8952	1680.8981	-1.75	0	28	1	U	N.TIAAAEHGIALMAAMAR.N + Oxidation (M); [-31.9721 at M12]
		158	174	561.3060	1680.8961	1680.8981	-1.19	0	28	1	U	N.TIAAAEHGIALMAAMAR.N + Oxidation (M); [-31.9721 at M12]
		158	174	561.3061	1680.8964	1680.8981	-0.98	0	31	1	U	N.TIAAAEHGIALMAAMAR.N + Oxidation (M); [-31.9721 at M12]
		158	174	841.4565	1680.8984	1680.8981	0.19	0	71	1	U	N.TIAAAEHGIALMAAMAR.N + Oxidation (M); [-31.9721 at M15]
		158	174	841.4566	1680.8986	1680.8981	0.33	0	66	1	U	N.TIAAAEHGIALMAAMAR.N + Oxidation (M); [-31.9721 at M15]
		158	174	565.9761	1694.9064	1694.9137	-4.34	0	47	1	U	N.TIAAAEHGIALMAAMAR.N + Oxidation (M); [-17.9564 at M12]
		158	174	565.9769	1694.9088	1694.9137	-2.93	0	48	1	U	N.TIAAAEHGIALMAAMAR.N + Oxidation (M); [-17.9564 at M12]
		158	174	565.9769	1694.9088	1694.9137	-2.93	0	34	1	U	N.TIAAAEHGIALMAAMAR.N + Oxidation (M); [-17.9564 at M12]
		158	174	565.9772	1694.9097	1694.9137	-2.40	0	42	1	U	N.TIAAAEHGIALMAAMAR.N + Oxidation (M); [-17.9564 at M12]
		158	174	565.9772	1694.9097	1694.9137	-2.40	0	46	1	U	N.TIAAAEHGIALMAAMAR.N + Oxidation (M); [-17.9564 at M12]
		158	174	565.9773	1694.9100	1694.9137	-2.18	0	50	1	U	N.TIAAAEHGIALMAAMAR.N + Oxidation (M); [-17.9564 at M12]
		158	174	565.9776	1694.9110	1694.9137	-1.63	0	50	1	U	N.TIAAAEHGIALMAAMAR.N + Oxidation (M); [-17.9564 at M12]
		158	174	565.9783	1694.9132	1694.9137	-0.34	0	56	1	U	N.TIAAAEHGIALMAAMAR.N + Oxidation (M); [-17.9564 at M12]
		158	174	848.4642	1694.9139	1694.9137	0.098	0	98	1	U	N.TIAAAEHGIALMAAMAR.N + Oxidation (M); [-17.9564 at M12]
		158	174	565.9790	1694.9152	1694.9137	0.84	0	48	1	U	N.TIAAAEHGIALMAAMAR.N + Oxidation (M); [-17.9564 at M12]
		158	174	565.9796	1694.9168	1694.9137	1.82	0	49	1	U	N.TIAAAEHGIALMAAMAR.N + Oxidation (M); [-17.9564 at M12]
		158	174	571.3077	1710.9014	1710.8909	6.14	0	29	1	U	N.TIAAAEHGIALMAAMAR.N + [+14.0157 at L11]
		158	174	571.3084	1710.9032	1710.8909	7.21	0	36	1	U	N.TIAAAEHGIALMAAMAR.N + [+14.0157 at C-term R]
		158	174	571.3085	1710.9038	1710.8909	7.53	0	29	1	U	N.TIAAAEHGIALMAAMAR.N + [+14.0157 at C-term R]
		158	174	571.3087	1710.9043	1710.8909	7.86	0	28	1	U	N.TIAAAEHGIALMAAMAR.N + [+14.0157 at C-term R]
		158	174	856.4602	1710.9059	1710.8909	8.76	0	34	1	U	N.TIAAAEHGIALMAAMAR.N + [+14.0157 at L11]
		158	174	856.4602	1710.9059	1710.8909	8.76	0	32	1	U	N.TIAAAEHGIALMAAMAR.N + [+14.0157 at L11]
		158	174	856.4605	1710.9063	1710.8909	9.04	0	32	1	U	N.TIAAAEHGIALMAAMAR.N + [+14.0157 at L11]
		158	174	856.4605	1710.9065	1710.8909	9.11	0	30	1	U	N.TIAAAEHGIALMAAMAR.N + [+14.0157 at L11]
		158	174	571.3095	1710.9067	1710.8909	9.25	0	31	1	U	N.TIAAAEHGIALMAAMAR.N + [+14.0157 at C-term R]
		158	174	571.3095	1710.9067	1710.8909	9.25	0	31	1	U	N.TIAAAEHGIALMAAMAR.N + [+14.0157 at C-term R]
		158	174	571.3097	1710.9072	1710.8909	9.56	0	30	1	U	N.TIAAAEHGIALMAAMAR.N + [+14.0157 at C-term R]
		158	174	576.6412	1726.9019	1726.8858	9.33	0	46	1	U	N.TIAAAEHGIALMAAMAR.N + [+30.0106 at A14]
		158	174	576.6417	1726.9033	1726.8858	10.2	0	39	1	U	N.TIAAAEHGIALMAAMAR.N + [+30.0106 at A14]
		158	174	576.6409	1726.9010	1726.8858	8.78	0	37	1	U	N.TIAAAEHGIALMAAMAR.N + Oxidation (M); [+14.0157 at C-term R]
		158	174	881.4340	1760.8534	1760.8644	-6.27	0	66	1	U	N.TIAAAEHGIALMAAMAR.N + Oxidation (M); Phospho (ST); [-31.9721 at M15]
		158	174	881.4348	1760.8551	1760.8644	-5.31	0	75	1	U	N.TIAAAEHGIALMAAMAR.N + Oxidation (M); Phospho (ST); [-31.9721 at M15]
		174	184	565.8116	1129.6087	1129.6091	-0.34	1	107	1	U	A.RNVAQADASVK.A + [-28.0061 at N-term R]
		175	184	501.7623	1001.5100	1001.4778	32.2	0	41	1	U	R.NVAQADASVK.A + [-0.0364 at C-term K]
		175	184	501.7626	1001.5106	1001.4778	32.8	0	55	1	U	R.NVAQADASVK.A + [-0.0364 at C-term K]
		175	184	501.7626	1001.5106	1001.4778	32.8	0	47	1	U	R.NVAQADASVK.A + [-0.0364 at C-term K]
		175	184	501.7627	1001.5108	1001.4778	33.0	0	45	1	U	R.NVAQADASVK.A + [-0.0364 at C-term K]
		175	184	501.7628	1001.5110	1001.4778	33.2	0	57	1	U	R.NVAQADASVK.A + [-0.0364 at C-term K]
		175	184	501.7628	1001.5111	1001.4778	33.3	0	57	1	U	R.NVAQADASVK.A + [-0.0364 at C-term K]
		175	184	501.7628	1001.5111	1001.4778	33.3	0	47	1	U	R.NVAQADASVK.A + [-0.0364 at C-term K]
		175	184	501.7629	1001.5113	1001.4778	33.4	0	55	1	U	R.NVAQADASVK.A + [-0.0364 at C-term K]
		175	184	501.7631	1001.5116	1001.4778	33.7	0	46	1	U	R.NVAQADASVK.A + [-0.0364 at C-term K]
		175	184	501.7631	1001.5117	1001.4778	33.9	0	52	1	U	R.NVAQADASVK.A + [-0.0364 at C-term K]
		175	184	501.7632	1001.5118	1001.4778	34.0	0	39	1	U	R.NVAQADASVK.A + [-0.0364 at C-term K]
		175	184	501.7632	1001.5118	1001.4778	34.0	0	56	1	U	R.NVAQADASVK.A + [-0.0364 at C-term K]
		175	184	501.7632	1001.5119	1001.4778	34.0	0	39	1	U	R.NVAQADASVK.A + [-0.0364 at C-term K]
		175	184	501.7632	1001.5119	1001.4778	34.0	0	52	1	U	R.NVAQADASVK.A + [-0.0364 at C-term K]
		175	184	501.7633	1001.5120	1001.4778	34.2	0	46	1	U	R.NVAQADASVK.A + [-0.0364 at C-term K]
		175	184	501.7633	1001.5121	1001.4778	34.2	0	52	1	U	R.NVAQADASVK.A + [-0.0364 at C-term K]
		175	184	501.7633	1001.5121	1001.4778	34.3	0	29	1	U	R.NVAQADASVK.A + [-0.0364 at C-term K]
		175	184	501.7635	1001.5124	1001.4778	34.6	0	35	1	U	R.NVAQADASVK.A + [-0.0364 at C-term K]
		175	184	501.7635	1001.5124	1001.4778	34.6	0	33	1	U	R.NVAQADASVK.A + [-0.0364 at C-term K]
		175	184	501.7636	1001.5125	1001.4778	34.7	0	53	1	U	R.NVAQADASVK.A + [-0.0364 at C-term K]
		175	184	501.7636	1001.5126	1001.4778	34.8	0	53	1	U	R.NVAQADASVK.A + [-0.0364 at C-term K]
		175	184	501.7636	1001.5126	1001.4778	34.8	0	53	1	U	R.NVAQADASVK.A + [-0.0364 at C-term K]
		175	184	501.7636	1001.5126	1001.4778	34.8	0	50	1	U	R.NVAQADASVK.A + [-0.0364 at C-term K]
		175	184	501.7636	1001.5127	1001.4778	34.8	0	57	1	U	R.NVAQADASVK.A + [-0.0364 at C-term K]
		175	184	501.7637	1001.5128	1001.4778	35.0	0	53	1	U	R.NVAQADASVK.A + [-0.0364 at C-term K]
		175	184	501.7637	1001.5128	1001.4778	35.0	0	49	1	U	R.NVAQADASVK.A + [-0.0364 at C-term K]
		175	184	501.7637	1001.5128	1001.4778	35.0	0	42	1	U	R.NVAQADASVK.A + [-0.0364 at C-term K]
		175	184	501.7637	1001.5129	1001.4778	35.1	0	57	1	U	R.NVAQADASVK.A + [-0.0364 at C-term K]
		175	184	501.7637	1001.5129	1001.4778	35.1	0	44	1	U	R.NVAQADASVK.A + [-0.0364 at C-term K]
		175	184	501.7637	1001.5129	1001.4778	35.1	0	31	1	U	R.NVAQADASVK.A + [-0.0364 at C-term K]
		175	184	501.7637	1001.5129	1001.4778	35.1	0	56	1	U	R.NVAQADASVK.A + [-0.0364 at C-term K]
		175	184	501.7638	1001.5130	1001.4778	35.1	0	47	1	U	R.NVAQADASVK.A + [-0.0364 at C-term K]
		175	184	501.7638	1001.5130	1001.4778	35.2	0	46	1	U	R.NVAQADASVK.A + [-0.0364 at C-term K]
		175	184	501.7639	1001.5132	1001.4778	35.4	0	42	1	U	R.NVAQADASVK.A + [-0.0364 at C-term K]
		175	184	501.7639	1001.5133	1001.4778	35.5	0	55	1	U	R.NVAQADASVK.A + [-0.0364 at C-term K]
		175	184	501.7639	1001.5133	1001.4778	35.5	0	53	1	U	R.NVAQADASVK.A + [-0.0364 at C-term K]
		175	184	501.7640	1001.5134	1001.4778	35.6	0	44	1	U	R.NVAQADASVK.A + [-0.0364 at C-term K]
		175	184	501.7640	1001.5135	1001.4778	35.6	0	53	1	U	R.NVAQADASVK.A + [-0.0364 at C-term K]
		175	184	501.7640	1001.5135	1001.4778	35.7	0	53	1	U	R.NVAQADASVK.A + [-0.0364 at C-term K]
		175	184	501.7641	1001.5136	1001.4778	35.8	0	44	1	U	R.NVAQADASVK.A + [-0.0364 at C-term K]
		175	184	501.7641	1001.5136	1001.4778	35.8	0	53	1	U	R.NVAQADASVK.A + [-0.0364 at C-term K]
		175	184	501.7641	1001.5136	1001.4778	35.8	0	53	1	U	R.NVAQADASVK.A + [-0.0364 at C-term K]
		175	184	501.7641	1001.5137	1001.4778	35.9	0	45	1	U	R.NVAQADASVK.A + [-0.0364 at C-term K]
		175	184	501.7641	1001.5137	1001.4778	35.9	0	53	1	U	R.NVAQADASVK.A + [-0.0364 at C-term K]
		175	184	501.7641	1001.5137	1001.4778	35.9	0	42	1	U	R.NVAQADASVK.A + [-0.0364 at C-term K]
		175	184	501.7641	1001.5137	1001.4778	35.9	0	53	1	U	R.NVAQADASVK.A + [-0.0364 at C-term K]
		175	184	501.7642	1001.5138	1001.4778	35.9	0	48	1	U	R.NVAQADASVK.A + [-0.0364 at C-term K]
		175	184	501.7642	1001.5138	1001.4778	36.0	0	52	1	U	R.NVAQADASVK.A + [-0.0364 at C-term K]
		175	184	501.7642	1001.5138	1001.4778	36.0	0	53	1	U	R.NVAQADASVK.A + [-0.0364 at C-term K]
		175	184	501.7643	1001.5139	1001.4778	36.1	0	47	1	U	R.NVAQADASVK.A + [-0.0364 at C-term K]
		175	184	501.7643	1001.5140	1001.4778	36.2	0	50	1	U	R.NVAQADASVK.A + [-0.0364 at C-term K]
		175	184	501.7643	1001.5140	1001.4778	36.2	0	53	1	U	R.NVAQADASVK.A + [-0.0364 at C-term K]
		175	184	501.7643	1001.5141	1001.4778	36.3	0	53	1	U	R.NVAQADASVK.A + [-0.0364 at C-term K]
		175	184	501.7643	1001.5141	1001.4778	36.3	0	47	1	U	R.NVAQADASVK.A + [-0.0364 at C-term K]
		175	184	501.7644	1001.5142	1001.4778	36.4	0	47	1	U	R.NVAQADASVK.A + [-0.0364 at C-term K]
		175	184	501.7644	1001.5142	1001.4778	36.4	0	45	1	U	R.NVAQADASVK.A + [-0.0364 at C-term K]
		175	184	501.7644	1001.5142	1001.4778	36.4	0	53	1	U	R.NVAQADASVK.A + [-0.0364 at C-term K]
		175	184	501.7644	1001.5142	1001.4778	36.4	0	50	1	U	R.NVAQADASVK.A + [-0.0364 at C-term K]
		175	184	501.7644	1001.5142	1001.4778	36.4	0	53	1	U	R.NVAQADASVK.A + [-0.0364 at C-term K]
		175	184	501.7645	1001.5144	1001.4778	36.6	0	43	1	U	R.NVAQADASVK.A + [-0.0364 at C-term K]
		175	184	501.7645	1001.5144	1001.4778	36.6	0	44	1	U	R.NVAQADASVK.A + [-0.0364 at C-term K]
		175	184	501.7645	1001.5144	1001.4778	36.6	0	47	1	U	R.NVAQADASVK.A + [-0.0364 at C-term K]
		175	184	501.7645	1001.5144	1001.4778	36.6	0	53	1	U	R.NVAQADASVK.A + [-0.0364 at C-term K]
		175	184	501.7645	1001.5144	1001.4778	36.6	0	53	1	U	R.NVAQADASVK.A + [-0.0364 at C-term K]
		175	184	501.7645	1001.5145	1001.4778	36.7	0	53	1	U	R.NVAQADASVK.A + [-0.0364 at C-term K]
		175	184	501.7645	1001.5145	1001.4778	36.7	0	53	1	U	R.NVAQADASVK.A + [-0.0364 at C-term K]
		175	184	501.7646	1001.5146	1001.4778	36.7	0	54	1	U	R.NVAQADASVK.A + [-0.0364 at C-term K]
		175	184	501.7646	1001.5146	1001.4778	36.8	0	50	1	U	R.NVAQADASVK.A + [-0.0364 at C-term K]
		175	184	501.7646	1001.5147	1001.4778	36.9	0	53	1	U	R.NVAQADASVK.A + [-0.0364 at C-term K]
		175	184	501.7647	1001.5147	1001.4778	36.9	0	53	1	U	R.NVAQADASVK.A + [-0.0364 at C-term K]
		175	184	501.7647	1001.5149	1001.4778	37.1	0	44	1	U	R.NVAQADASVK.A + [-0.0364 at C-term K]
		175	184	501.7648	1001.5150	1001.4778	37.2	0	53	1	U	R.NVAQADASVK.A + [-0.0364 at C-term K]
		175	184	501.7651	1001.5157	1001.4778	37.9	0	47	1	U	R.NVAQADASVK.A + [-0.0364 at C-term K]
		175	184	502.2552	1002.4959	1002.4982	-2.28	0	52	1	U	R.NVAQADASVK.A + [+0.9840 at Q4]
		175	184	502.2555	1002.4965	1002.4982	-1.68	0	40	1	U	R.NVAQADASVK.A + [+0.9840 at Q4]
		175	184	502.2560	1002.4975	1002.4982	-0.64	0	42	1	U	R.NVAQADASVK.A + [+0.9840 at Q4]
		175	184	502.2562	1002.4979	1002.4982	-0.26	0	42	1	U	R.NVAQADASVK.A + [+0.9840 at Q4]
		175	184	502.2563	1002.4980	1002.4982	-0.14	0	54	1	U	R.NVAQADASVK.A + [+0.9840 at N-term N]
		175	184	502.2563	1002.4981	1002.4982	-0.081	0	69	1	U	R.NVAQADASVK.A + [+0.9840 at N-term N]
		175	184	502.2563	1002.4981	1002.4982	-0.021	0	48	1	U	R.NVAQADASVK.A + [+0.9840 at N-term N]
		175	184	508.7713	1015.5280	1015.5298	-1.74	0	35	1	U	R.NVAQADASVK.A + [+14.0157 at V9]
		175	184	509.2627	1016.5109	1016.5138	-2.87	0	41	1	U	R.NVAQADASVK.A + [+14.9997 at Q4]
		175	184	509.2629	1016.5113	1016.5138	-2.51	0	29	1	U	R.NVAQADASVK.A + [+14.9997 at Q4]
		175	184	509.2629	1016.5113	1016.5138	-2.46	0	37	1	U	R.NVAQADASVK.A + [+14.9997 at Q4]
		175	184	509.2630	1016.5114	1016.5138	-2.40	0	45	1	U	R.NVAQADASVK.A + [+14.9997 at Q4]
		175	184	509.2631	1016.5116	1016.5138	-2.16	0	56	1	U	R.NVAQADASVK.A + [+14.9997 at Q4]
		175	184	509.2632	1016.5119	1016.5138	-1.92	0	49	1	U	R.NVAQADASVK.A + [+14.9997 at Q4]
		175	184	509.2636	1016.5125	1016.5138	-1.26	0	36	1	U	R.NVAQADASVK.A + [+14.9997 at Q4]
		175	184	520.7359	1039.4572	1039.4700	-12.3	0	29	1	U	R.NVAQADASVK.A + [+37.9559 at D6]
		175	185	559.2768	1116.5390	1116.5411	-1.85	1	37	1	U	R.NVAQADASVKA.G + [+43.9898 at K10]
		175	189	809.3954	1616.7763	1616.7794	-1.90	1	58	1	U	R.NVAQADASVKAGEWK.R + [+43.9898 at A11]
		175	189	809.3962	1616.7778	1616.7794	-1.00	1	68	1	U	R.NVAQADASVKAGEWK.R + [+43.9898 at A11]
		176	184	514.7706	1027.5267	1027.5662	-38.4	0	37	1	U	N.VAQADASVK.A + [+140.0950 at N-term]
		177	184	507.7631	1013.5116	1013.4964	15.0	0	30	1	U	V.AQADASVK.A + [+225.0936 at N-term]
		185	190	395.6944	789.3742	789.3769	-3.39	1	44	1	U	K.AGEWKR.N + [+43.9898 at N-term A]
		185	190	395.6945	789.3745	789.3769	-3.01	1	36	1	U	K.AGEWKR.N + [+43.9898 at N-term A]
		185	190	395.6953	789.3760	789.3769	-1.16	1	25	1	U	K.AGEWKR.N + [+43.9898 at N-term A]
		192	201	582.8336	1163.6527	1163.6550	-2.01	1	46	1	U	N.KYVGVSLVGK.T + Carbamidomethyl (K); [+58.0055 at N-term]
		192	201	582.8336	1163.6527	1163.6550	-2.01	1	51	1	U	N.KYVGVSLVGK.T + Carbamidomethyl (K); [+58.0055 at N-term]
		192	201	582.8337	1163.6528	1163.6550	-1.91	1	44	1	U	N.KYVGVSLVGK.T + Carbamidomethyl (K); [+58.0055 at N-term]
		193	201	461.2710	920.5274	920.4968	33.3	0	48	1	U	K.YVGVSLVGK.T + [-0.0364 at C-term K]
		193	201	461.2714	920.5283	920.4968	34.3	0	33	1	U	K.YVGVSLVGK.T + [-0.0364 at C-term K]
		193	201	461.2716	920.5287	920.4968	34.7	0	48	1	U	K.YVGVSLVGK.T + [-0.0364 at C-term K]
		193	201	461.2716	920.5287	920.4968	34.7	0	48	1	U	K.YVGVSLVGK.T + [-0.0364 at C-term K]
		193	201	461.2720	920.5294	920.4968	35.5	0	48	1	U	K.YVGVSLVGK.T + [-0.0364 at C-term K]
		193	201	461.2722	920.5298	920.4968	35.9	0	34	1	U	K.YVGVSLVGK.T + [-0.0364 at C-term K]
		193	201	461.2722	920.5298	920.4968	35.9	0	47	1	U	K.YVGVSLVGK.T + [-0.0364 at C-term K]
		193	201	461.2722	920.5299	920.4968	36.1	0	47	1	U	K.YVGVSLVGK.T + [-0.0364 at C-term K]
		193	201	461.2723	920.5300	920.4968	36.1	0	48	1	U	K.YVGVSLVGK.T + [-0.0364 at C-term K]
		193	201	461.2726	920.5305	920.4968	36.7	0	43	1	U	K.YVGVSLVGK.T + [-0.0364 at C-term K]
		193	201	461.2726	920.5307	920.4968	36.9	0	47	1	U	K.YVGVSLVGK.T + [-0.0364 at C-term K]
		193	201	461.2726	920.5307	920.4968	36.9	0	46	1	U	K.YVGVSLVGK.T + [-0.0364 at C-term K]
		193	201	461.2727	920.5308	920.4968	37.0	0	48	1	U	K.YVGVSLVGK.T + [-0.0364 at C-term K]
		193	201	461.2727	920.5309	920.4968	37.1	0	38	1	U	K.YVGVSLVGK.T + [-0.0364 at C-term K]
		193	201	461.2727	920.5309	920.4968	37.1	0	40	1	U	K.YVGVSLVGK.T + [-0.0364 at C-term K]
		193	201	461.2727	920.5309	920.4968	37.1	0	43	1	U	K.YVGVSLVGK.T + [-0.0364 at C-term K]
		193	201	461.2728	920.5310	920.4968	37.3	0	44	1	U	K.YVGVSLVGK.T + [-0.0364 at C-term K]
		193	201	461.2728	920.5311	920.4968	37.3	0	43	1	U	K.YVGVSLVGK.T + [-0.0364 at C-term K]
		193	201	461.2729	920.5313	920.4968	37.5	0	42	1	U	K.YVGVSLVGK.T + [-0.0364 at C-term K]
		193	201	461.2729	920.5313	920.4968	37.6	0	40	1	U	K.YVGVSLVGK.T + [-0.0364 at C-term K]
		193	201	461.2731	920.5316	920.4968	37.8	0	40	1	U	K.YVGVSLVGK.T + [-0.0364 at C-term K]
		193	201	461.2731	920.5316	920.4968	37.9	0	42	1	U	K.YVGVSLVGK.T + [-0.0364 at C-term K]
		193	201	461.2731	920.5316	920.4968	37.9	0	48	1	U	K.YVGVSLVGK.T + [-0.0364 at C-term K]
		193	201	461.2731	920.5316	920.4968	37.9	0	46	1	U	K.YVGVSLVGK.T + [-0.0364 at C-term K]
		193	201	461.2731	920.5317	920.4968	38.0	0	43	1	U	K.YVGVSLVGK.T + [-0.0364 at C-term K]
		193	201	461.2732	920.5318	920.4968	38.0	0	39	1	U	K.YVGVSLVGK.T + [-0.0364 at C-term K]
		193	201	461.2734	920.5323	920.4968	38.6	0	44	1	U	K.YVGVSLVGK.T + [-0.0364 at C-term K]
		193	201	461.2736	920.5327	920.4968	39.1	0	47	1	U	K.YVGVSLVGK.T + [-0.0364 at C-term K]
		193	201	461.2737	920.5329	920.4968	39.2	0	46	1	U	K.YVGVSLVGK.T + [-0.0364 at C-term K]
		202	210	462.2537	922.4928	922.4946	-1.95	0	80	1	U	K.TLAVLGFGK.V + [+17.9564 at L5]
		211	217	365.7129	729.4112	729.4134	-2.92	0	26	1	U	K.VGTEVAR.R + [-0.9840 at E4]
		211	217	365.7136	729.4127	729.4134	-0.84	0	62	1	U	K.VGTEVAR.R + [-0.9840 at E4]
		211	217	366.2044	730.3942	730.3974	-4.31	0	69	1	U	K.VGTEVAR.R
		211	217	366.2045	730.3944	730.3974	-4.06	0	58	1	U	K.VGTEVAR.R
		211	217	373.2126	744.4105	744.4130	-3.31	0	54	1	U	K.VGTEVAR.R + [+14.0157 at E4]
		211	217	380.2209	758.4272	758.4286	-1.95	0	54	1	U	K.VGTEVAR.R + [+28.0313 at E4]
		211	217	395.2082	788.4018	788.4028	-1.35	0	35	1	U	K.VGTEVAR.R + [+58.0055 at N-term]
		211	217	395.2083	788.4021	788.4028	-0.89	0	32	1	U	K.VGTEVAR.R + [+58.0055 at N-term]
		211	217	402.2156	802.4166	802.4185	-2.34	0	26	1	U	K.VGTEVAR.R + [+72.0211 at G2]
		211	217	402.2158	802.4170	802.4185	-1.82	0	39	1	U	K.VGTEVAR.R + [+72.0211 at G2]
		211	217	402.2159	802.4173	802.4185	-1.45	0	26	1	U	K.VGTEVAR.R + [+72.0211 at G2]
		211	217	410.2136	818.4126	818.3956	20.7	0	60	1	U	K.VGTEVAR.R + [+87.9983 at N-term]
		211	218	471.2617	940.5089	940.5090	-0.14	1	53	1	U	K.VGTEVARR.A + [+54.0106 at R7]
		226	236	591.7922	1181.5698	1181.5353	29.2	0	33	1	U	R.VIAHDPYAPAD.R + [+13.9793 at P9]
		226	236	591.7924	1181.5702	1181.5353	29.5	0	30	1	U	R.VIAHDPYAPAD.R + [+13.9793 at P9]
		226	237	442.2231	1323.6476	1323.6571	-7.21	0	29	1	U	R.VIAHDPYAPADR.A
		226	237	442.2235	1323.6485	1323.6571	-6.51	0	30	1	U	R.VIAHDPYAPADR.A
		226	237	662.8325	1323.6505	1323.6571	-5.02	0	34	1	U	R.VIAHDPYAPADR.A
		226	237	442.2248	1323.6525	1323.6571	-3.47	0	45	1	U	R.VIAHDPYAPADR.A
		226	237	662.8338	1323.6530	1323.6571	-3.09	0	55	1	U	R.VIAHDPYAPADR.A
		226	237	662.8339	1323.6532	1323.6571	-3.00	0	45	1	U	R.VIAHDPYAPADR.A
		226	237	442.2250	1323.6532	1323.6571	-2.97	0	49	1	U	R.VIAHDPYAPADR.A
		226	237	662.8340	1323.6534	1323.6571	-2.82	0	46	1	U	R.VIAHDPYAPADR.A
		226	237	662.8341	1323.6535	1323.6571	-2.71	0	53	1	U	R.VIAHDPYAPADR.A
		226	237	442.2251	1323.6536	1323.6571	-2.70	0	45	1	U	R.VIAHDPYAPADR.A
		226	237	662.8342	1323.6539	1323.6571	-2.44	0	39	1	U	R.VIAHDPYAPADR.A
		226	237	662.8342	1323.6539	1323.6571	-2.44	0	58	1	U	R.VIAHDPYAPADR.A
		226	237	662.8343	1323.6540	1323.6571	-2.35	0	43	1	U	R.VIAHDPYAPADR.A
		226	237	662.8343	1323.6541	1323.6571	-2.26	0	58	1	U	R.VIAHDPYAPADR.A
		226	237	442.2256	1323.6549	1323.6571	-1.72	0	46	1	U	R.VIAHDPYAPADR.A
		226	237	662.8352	1323.6559	1323.6571	-0.96	0	55	1	U	R.VIAHDPYAPADR.A
		226	237	442.2260	1323.6560	1323.6571	-0.84	0	35	1	U	R.VIAHDPYAPADR.A
		226	237	442.2260	1323.6561	1323.6571	-0.77	0	36	1	U	R.VIAHDPYAPADR.A
		226	237	442.2260	1323.6562	1323.6571	-0.70	0	43	1	U	R.VIAHDPYAPADR.A
		226	237	442.2261	1323.6566	1323.6571	-0.41	0	42	1	U	R.VIAHDPYAPADR.A
		226	237	442.2262	1323.6567	1323.6571	-0.34	0	39	1	U	R.VIAHDPYAPADR.A
		226	237	442.2262	1323.6569	1323.6571	-0.21	0	28	1	U	R.VIAHDPYAPADR.A
		226	237	442.2264	1323.6574	1323.6571	0.20	0	42	1	U	R.VIAHDPYAPADR.A
		226	237	442.2264	1323.6575	1323.6571	0.27	0	39	1	U	R.VIAHDPYAPADR.A
		226	237	442.2268	1323.6587	1323.6571	1.18	0	39	1	U	R.VIAHDPYAPADR.A
		226	237	442.2272	1323.6599	1323.6571	2.06	0	32	1	U	R.VIAHDPYAPADR.A
		226	237	442.2285	1323.6636	1323.6571	4.92	0	43	1	U	R.VIAHDPYAPADR.A
		226	237	442.5602	1324.6589	1324.6160	32.4	0	34	1	U	R.VIAHDPYAPADR.A + [+0.9589 at I2]
		226	237	669.8420	1337.6694	1337.6364	24.7	0	44	1	U	R.VIAHDPYAPADR.A + [+13.9793 at P9]
		226	237	669.8422	1337.6699	1337.6364	25.0	0	44	1	U	R.VIAHDPYAPADR.A + [+13.9793 at P9]
		226	237	669.8420	1337.6694	1337.6728	-2.53	0	34	1	U	R.VIAHDPYAPADR.A + [+14.0157 at D5]
		226	237	446.8971	1337.6696	1337.6728	-2.41	0	36	1	U	R.VIAHDPYAPADR.A + [+14.0157 at D11]
		226	237	446.8972	1337.6698	1337.6728	-2.21	0	40	1	U	R.VIAHDPYAPADR.A + [+14.0157 at D5]
		226	237	669.8424	1337.6701	1337.6728	-1.98	0	72	1	U	R.VIAHDPYAPADR.A + [+14.0157 at D5]
		226	237	446.8973	1337.6702	1337.6728	-1.94	0	42	1	U	R.VIAHDPYAPADR.A + [+14.0157 at D5]
		226	237	669.8425	1337.6704	1337.6728	-1.80	0	72	1	U	R.VIAHDPYAPADR.A + [+14.0157 at D5]
		226	237	669.8426	1337.6706	1337.6728	-1.62	0	49	1	U	R.VIAHDPYAPADR.A + [+14.0157 at D5]
		226	237	446.8975	1337.6706	1337.6728	-1.61	0	41	1	U	R.VIAHDPYAPADR.A + [+14.0157 at D5]
		226	237	446.8975	1337.6707	1337.6728	-1.54	0	55	1	U	R.VIAHDPYAPADR.A + [+14.0157 at D5]
		226	237	669.8427	1337.6707	1337.6728	-1.53	0	60	1	U	R.VIAHDPYAPADR.A + [+14.0157 at D5]
		226	237	669.8427	1337.6707	1337.6728	-1.53	0	46	1	U	R.VIAHDPYAPADR.A + [+14.0157 at D5]
		226	237	669.8427	1337.6707	1337.6728	-1.53	0	46	1	U	R.VIAHDPYAPADR.A + [+14.0157 at D5]
		226	237	669.8427	1337.6709	1337.6728	-1.44	0	60	1	U	R.VIAHDPYAPADR.A + [+14.0157 at D5]
		226	237	446.8976	1337.6710	1337.6728	-1.34	0	41	1	U	R.VIAHDPYAPADR.A + [+14.0157 at D5]
		226	237	446.8976	1337.6710	1337.6728	-1.34	0	42	1	U	R.VIAHDPYAPADR.A + [+14.0157 at D5]
		226	237	447.5570	1339.6493	1339.6521	-2.06	0	52	1	U	R.VIAHDPYAPADR.A + [+15.9949 at Y7]
		226	237	447.5570	1339.6493	1339.6521	-2.06	0	53	1	U	R.VIAHDPYAPADR.A + [+15.9949 at Y7]
		226	237	670.8320	1339.6495	1339.6521	-1.90	0	39	1	U	R.VIAHDPYAPADR.A + [+15.9949 at Y7]
		226	237	450.8969	1349.6690	1349.6728	-2.81	0	39	1	U	R.VIAHDPYAPADR.A + [+26.0157 at H4]
		226	237	450.8977	1349.6714	1349.6728	-1.04	0	41	1	U	R.VIAHDPYAPADR.A + [+26.0157 at H4]
		226	237	691.3443	1380.6740	1380.6786	-3.30	0	34	1	U	R.VIAHDPYAPADR.A + [+57.0215 at H4]
		226	237	691.3453	1380.6760	1380.6786	-1.88	0	40	1	U	R.VIAHDPYAPADR.A + [+57.0215 at H4]
		227	237	461.2317	1380.6734	1380.7038	-22.0	0	29	1	U	V.IAHDPYAPADR.A + [+156.1150 at H3]
		227	237	725.3635	1448.7124	1448.7412	-19.9	0	36	1	U	V.IAHDPYAPADR.A + [+224.1525 at N-term]
		229	237	521.2372	1040.4598	1040.4675	-7.44	0	28	1	U	A.HDPYAPADR.A
		229	237	521.2389	1040.4632	1040.4675	-4.15	0	27	1	U	A.HDPYAPADR.A
		231	237	395.1972	788.3799	788.3817	-2.23	0	33	1	U	D.PYAPADR.A
		232	237	401.1970	800.3795	800.3755	5.07	0	27	1	U	P.YAPADR.A + [+109.0466 at N-term]
		232	237	401.1974	800.3802	800.3755	5.92	0	25	1	U	P.YAPADR.A + [+109.0466 at N-term]
		232	237	401.1974	800.3802	800.3755	5.92	0	25	1	U	P.YAPADR.A + [+109.0466 at N-term]
		261	270	549.7829	1097.5512	1097.5540	-2.47	0	58	1	U	L.HMPLTPTTSK.I + Oxidation (M); [-30.0106 at T7]
		261	270	549.7834	1097.5522	1097.5540	-1.57	0	60	1	U	L.HMPLTPTTSK.I + Oxidation (M); [-30.0106 at T7]
		262	270	481.2530	960.4915	960.4950	-3.64	0	75	1	U	H.MPLTPTTSK.I + Oxidation (M); [-30.0106 at T6]
		262	270	481.2543	960.4940	960.4950	-1.03	0	71	1	U	H.MPLTPTTSK.I + Oxidation (M); [-30.0106 at T6]
		262	270	481.2547	960.4949	960.4950	-0.14	0	71	1	U	H.MPLTPTTSK.I + Oxidation (M); [-30.0106 at T6]
		271	279	525.7750	1049.5355	1049.5029	31.0	0	63	1	U	K.ILNDETFAK.M + [-0.0364 at C-term K]
		271	279	525.7753	1049.5360	1049.5029	31.5	0	63	1	U	K.ILNDETFAK.M + [-0.0364 at C-term K]
		271	279	525.7753	1049.5360	1049.5029	31.5	0	63	1	U	K.ILNDETFAK.M + [-0.0364 at C-term K]
		271	279	525.7756	1049.5367	1049.5029	32.2	0	64	1	U	K.ILNDETFAK.M + [-0.0364 at C-term K]
		271	279	526.2690	1050.5235	1050.5233	0.20	0	46	1	U	K.ILNDETFAK.M + [+0.9840 at N3]
		271	279	526.2690	1050.5235	1050.5233	0.20	0	54	1	U	K.ILNDETFAK.M + [+0.9840 at N3]
		271	279	526.2696	1050.5247	1050.5233	1.36	0	63	1	U	K.ILNDETFAK.M + [+0.9840 at N3]
		271	279	532.7832	1063.5518	1063.5550	-2.93	0	61	1	U	K.ILNDETFAK.M + [+14.0157 at E5]
		271	279	532.7839	1063.5533	1063.5550	-1.54	0	49	1	U	K.ILNDETFAK.M + [+14.0157 at E5]
		271	279	532.7843	1063.5540	1063.5550	-0.86	0	63	1	U	K.ILNDETFAK.M + [+14.0157 at E5]
		271	279	536.7650	1071.5155	1071.5212	-5.39	0	32	1	U	K.ILNDETFAK.M + [+21.9819 at C-term]
		271	279	536.7653	1071.5161	1071.5212	-4.81	0	32	1	U	K.ILNDETFAK.M + [+21.9819 at C-term]
		271	279	536.7657	1071.5168	1071.5212	-4.12	0	32	1	U	K.ILNDETFAK.M + [+21.9819 at C-term]
		271	279	536.7649	1071.5153	1071.5213	-5.51	0	35	1	U	K.ILNDETFAK.M + [+21.9819 at E5]
		271	279	539.7912	1077.5678	1077.5706	-2.56	0	63	1	U	K.ILNDETFAK.M + [+28.0313 at E5]
		271	279	539.7919	1077.5693	1077.5706	-1.20	0	63	1	U	K.ILNDETFAK.M + [+28.0313 at E5]
		286	291	336.2122	670.4098	670.4126	-4.22	0	38	1	U	R.IVNVAR.G
		286	291	336.2124	670.4102	670.4126	-3.51	0	38	1	U	R.IVNVAR.G
		286	291	336.2136	670.4126	670.4126	0.045	0	25	1	U	R.IVNVAR.G
		286	291	336.7038	671.3931	671.3966	-5.21	0	39	1	U	R.IVNVAR.G + [+0.9840 at N3]
		286	291	336.7044	671.3942	671.3966	-3.57	0	34	1	U	R.IVNVAR.G + [+0.9840 at N3]
		286	291	336.7049	671.3953	671.3966	-1.93	0	38	1	U	R.IVNVAR.G + [+0.9840 at N3]
		286	291	336.7051	671.3957	671.3966	-1.31	0	38	1	U	R.IVNVAR.G + [+0.9840 at N3]
		286	291	343.2207	684.4269	684.4283	-1.97	0	35	1	U	R.IVNVAR.G + [+14.0157 at V2]
		286	291	343.2209	684.4272	684.4283	-1.59	0	35	1	U	R.IVNVAR.G + [+14.0157 at V2]
		292	302	572.3024	1142.5903	1142.5932	-2.49	0	61	1	U	R.GGVIDEDALVR.A
		292	302	572.3025	1142.5904	1142.5932	-2.39	0	45	1	U	R.GGVIDEDALVR.A
		292	302	572.3029	1142.5912	1142.5932	-1.74	0	49	1	U	R.GGVIDEDALVR.A
		292	302	572.3029	1142.5913	1142.5932	-1.63	0	45	1	U	R.GGVIDEDALVR.A
		292	302	572.3030	1142.5914	1142.5932	-1.53	0	57	1	U	R.GGVIDEDALVR.A
		292	302	572.3030	1142.5914	1142.5932	-1.53	0	46	1	U	R.GGVIDEDALVR.A
		292	302	572.3030	1142.5915	1142.5932	-1.42	0	61	1	U	R.GGVIDEDALVR.A
		292	302	572.3031	1142.5916	1142.5932	-1.32	0	57	1	U	R.GGVIDEDALVR.A
		292	302	572.3044	1142.5942	1142.5932	0.92	0	50	1	U	R.GGVIDEDALVR.A
		292	302	572.3046	1142.5947	1142.5932	1.36	0	29	1	U	R.GGVIDEDALVR.A
		292	302	579.3101	1156.6057	1156.6088	-2.70	0	64	1	U	R.GGVIDEDALVR.A + [+14.0157 at E6]
		292	302	579.3104	1156.6062	1156.6088	-2.28	0	69	1	U	R.GGVIDEDALVR.A + [+14.0157 at E6]
		292	302	579.3104	1156.6063	1156.6088	-2.18	0	69	1	U	R.GGVIDEDALVR.A + [+14.0157 at E6]
		292	302	579.3107	1156.6069	1156.6088	-1.64	0	64	1	U	R.GGVIDEDALVR.A + [+14.0157 at E6]
		292	302	579.3108	1156.6070	1156.6088	-1.54	0	64	1	U	R.GGVIDEDALVR.A + [+14.0157 at E6]
		292	302	579.3108	1156.6071	1156.6088	-1.44	0	64	1	U	R.GGVIDEDALVR.A + [+14.0157 at E6]
		292	302	579.3109	1156.6073	1156.6088	-1.33	0	48	1	U	R.GGVIDEDALVR.A + [+14.0157 at E6]
		292	302	579.3111	1156.6076	1156.6088	-1.00	0	69	1	U	R.GGVIDEDALVR.A + [+14.0157 at E6]
		292	302	579.3112	1156.6079	1156.6088	-0.80	0	57	1	U	R.GGVIDEDALVR.A + [+14.0157 at E6]
		292	302	583.2918	1164.5691	1164.5751	-5.18	0	38	1	U	R.GGVIDEDALVR.A + [+21.9819 at D5]
		292	302	583.2924	1164.5703	1164.5751	-4.14	0	39	1	U	R.GGVIDEDALVR.A + [+21.9819 at D5]
		292	302	583.2925	1164.5705	1164.5751	-3.93	0	39	1	U	R.GGVIDEDALVR.A + [+21.9819 at D5]
		292	302	583.2929	1164.5713	1164.5751	-3.29	0	35	1	U	R.GGVIDEDALVR.A + [+21.9819 at D5]
		292	302	583.2930	1164.5715	1164.5751	-3.09	0	38	1	U	R.GGVIDEDALVR.A + [+21.9819 at D5]
		292	302	591.2747	1180.5349	1180.5490	-12.0	0	30	1	U	R.GGVIDEDALVR.A + [+37.9559 at D5]
		292	302	591.2754	1180.5363	1180.5490	-10.8	0	29	1	U	R.GGVIDEDALVR.A + [+37.9559 at D5]
		292	302	608.3123	1214.6101	1214.6143	-3.46	0	55	1	U	R.GGVIDEDALVR.A + [+72.0211 at N-term G]
		293	302	543.7907	1085.5669	1085.5717	-4.44	0	58	1	U	G.GVIDEDALVR.A
		293	302	543.7922	1085.5698	1085.5717	-1.73	0	58	1	U	G.GVIDEDALVR.A
		293	302	543.7934	1085.5722	1085.5717	0.52	0	66	1	U	G.GVIDEDALVR.A
		293	302	543.7936	1085.5726	1085.5717	0.85	0	51	1	U	G.GVIDEDALVR.A
		293	302	543.7941	1085.5737	1085.5717	1.86	0	66	1	U	G.GVIDEDALVR.A
		294	302	515.2817	1028.5488	1028.5502	-1.37	0	58	1	U	G.VIDEDALVR.A
		294	302	522.2894	1042.5642	1042.5659	-1.62	0	48	1	U	G.VIDEDALVR.A + [+14.0157 at E4]
		294	302	583.2937	1164.5728	1164.5332	34.0	0	55	1	U	G.VIDEDALVR.A + [+135.9830 at N-term]
		294	302	583.2946	1164.5747	1164.5332	35.6	0	69	1	U	G.VIDEDALVR.A + [+135.9830 at N-term]
		294	302	583.2950	1164.5754	1164.5332	36.2	0	56	1	U	G.VIDEDALVR.A + [+135.9830 at N-term]
		294	302	583.2950	1164.5754	1164.5332	36.2	0	31	1	U	G.VIDEDALVR.A + [+135.9830 at N-term]
		294	302	583.2950	1164.5755	1164.5332	36.3	0	69	1	U	G.VIDEDALVR.A + [+135.9830 at N-term]
		294	302	583.2953	1164.5761	1164.5332	36.8	0	69	1	U	G.VIDEDALVR.A + [+135.9830 at N-term]
		294	302	585.3107	1168.6069	1168.6452	-32.7	0	45	1	U	G.VIDEDALVR.A + [+140.0950 at N-term]
		294	302	585.3117	1168.6089	1168.6452	-31.1	0	51	1	U	G.VIDEDALVR.A + [+140.0950 at N-term]
		294	302	585.3118	1168.6090	1168.6452	-31.0	0	45	1	U	G.VIDEDALVR.A + [+140.0950 at N-term]
		294	302	585.3118	1168.6091	1168.6452	-30.9	0	52	1	U	G.VIDEDALVR.A + [+140.0950 at N-term]
		296	302	599.2610	1196.5075	1196.5448	-31.2	0	52	1	U	I.DEDALVR.A + [+380.1471 at N-term]
		303	319	573.3059	1716.8959	1716.9298	-19.7	0	37	1	U	R.ALDAGIVAQAALDVFTK.E + [+14.9997 at Q9]
		303	319	573.3066	1716.8979	1716.9410	-25.1	0	38	1	U	R.ALDAGIVAQAALDVFTK.E + [+15.0109 at I6]
		303	319	859.9628	1717.9111	1717.9250	-8.12	0	62	1	U	R.ALDAGIVAQAALDVFTK.E + [+15.9949 at A8]
		303	319	859.9634	1717.9123	1717.9250	-7.40	0	55	1	U	R.ALDAGIVAQAALDVFTK.E + [+15.9949 at A8]
		303	319	859.9638	1717.9131	1717.9250	-6.97	0	64	1	U	R.ALDAGIVAQAALDVFTK.E + [+15.9949 at A8]
		303	319	859.9639	1717.9133	1717.9250	-6.83	0	61	1	U	R.ALDAGIVAQAALDVFTK.E + [+15.9949 at A8]
		303	319	859.9646	1717.9146	1717.9250	-6.05	0	59	1	U	R.ALDAGIVAQAALDVFTK.E + [+15.9949 at A8]
		303	319	859.9647	1717.9148	1717.9250	-5.98	0	58	1	U	R.ALDAGIVAQAALDVFTK.E + [+15.9949 at A8]
		303	319	859.9650	1717.9155	1717.9250	-5.55	0	64	1	U	R.ALDAGIVAQAALDVFTK.E + [+15.9949 at A8]
		303	319	859.9652	1717.9159	1717.9250	-5.34	0	61	1	U	R.ALDAGIVAQAALDVFTK.E + [+15.9949 at A8]
		303	319	859.9654	1717.9162	1717.9250	-5.13	0	48	1	U	R.ALDAGIVAQAALDVFTK.E + [+15.9949 at A10]
		303	319	859.9662	1717.9178	1717.9250	-4.20	0	72	1	U	R.ALDAGIVAQAALDVFTK.E + [+15.9949 at A8]
		303	319	859.9662	1717.9179	1717.9250	-4.13	0	60	1	U	R.ALDAGIVAQAALDVFTK.E + [+15.9949 at A8]
		303	319	859.9667	1717.9188	1717.9250	-3.64	0	60	1	U	R.ALDAGIVAQAALDVFTK.E + [+15.9949 at A8]
		303	319	859.9669	1717.9193	1717.9250	-3.35	0	82	1	U	R.ALDAGIVAQAALDVFTK.E + [+15.9949 at A8]
		303	319	573.6471	1717.9194	1717.9250	-3.26	0	60	1	U	R.ALDAGIVAQAALDVFTK.E + [+15.9949 at A8]
		303	319	859.9672	1717.9198	1717.9250	-3.07	0	59	1	U	R.ALDAGIVAQAALDVFTK.E + [+15.9949 at A8]
		303	319	859.9672	1717.9199	1717.9250	-3.00	0	62	1	U	R.ALDAGIVAQAALDVFTK.E + [+15.9949 at A8]
		303	319	859.9673	1717.9200	1717.9250	-2.92	0	79	1	U	R.ALDAGIVAQAALDVFTK.E + [+15.9949 at A8]
		303	319	859.9673	1717.9200	1717.9250	-2.92	0	83	1	U	R.ALDAGIVAQAALDVFTK.E + [+15.9949 at A8]
		303	319	859.9674	1717.9203	1717.9250	-2.78	0	77	1	U	R.ALDAGIVAQAALDVFTK.E + [+15.9949 at A8]
		303	319	859.9675	1717.9204	1717.9250	-2.71	0	86	1	U	R.ALDAGIVAQAALDVFTK.E + [+15.9949 at A8]
		303	319	859.9676	1717.9206	1717.9250	-2.57	0	74	1	U	R.ALDAGIVAQAALDVFTK.E + [+15.9949 at A8]
		303	319	573.6475	1717.9207	1717.9250	-2.51	0	65	1	U	R.ALDAGIVAQAALDVFTK.E + [+15.9949 at A8]
		303	319	859.9677	1717.9207	1717.9250	-2.50	0	60	1	U	R.ALDAGIVAQAALDVFTK.E + [+15.9949 at A8]
		303	319	573.6476	1717.9209	1717.9250	-2.41	0	60	1	U	R.ALDAGIVAQAALDVFTK.E + [+15.9949 at A8]
		303	319	859.9678	1717.9211	1717.9250	-2.29	0	56	1	U	R.ALDAGIVAQAALDVFTK.E + [+15.9949 at A8]
		303	319	859.9681	1717.9216	1717.9250	-2.00	0	83	1	U	R.ALDAGIVAQAALDVFTK.E + [+15.9949 at A8]
		303	319	859.9681	1717.9216	1717.9250	-2.00	0	60	1	U	R.ALDAGIVAQAALDVFTK.E + [+15.9949 at A8]
		303	319	573.6479	1717.9218	1717.9250	-1.87	0	33	1	U	R.ALDAGIVAQAALDVFTK.E + [+15.9949 at A8]
		303	319	859.9682	1717.9218	1717.9250	-1.86	0	66	1	U	R.ALDAGIVAQAALDVFTK.E + [+15.9949 at A8]
		303	319	859.9683	1717.9220	1717.9250	-1.79	0	66	1	U	R.ALDAGIVAQAALDVFTK.E + [+15.9949 at A8]
		303	319	859.9684	1717.9223	1717.9250	-1.58	0	81	1	U	R.ALDAGIVAQAALDVFTK.E + [+15.9949 at A8]
		303	319	859.9686	1717.9227	1717.9250	-1.36	0	72	1	U	R.ALDAGIVAQAALDVFTK.E + [+15.9949 at A8]
		303	319	859.9688	1717.9229	1717.9250	-1.22	0	72	1	U	R.ALDAGIVAQAALDVFTK.E + [+15.9949 at A8]
		303	319	859.9688	1717.9231	1717.9250	-1.15	0	92	1	U	R.ALDAGIVAQAALDVFTK.E + [+15.9949 at A8]
		303	319	859.9688	1717.9231	1717.9250	-1.15	0	60	1	U	R.ALDAGIVAQAALDVFTK.E + [+15.9949 at A8]
		303	319	859.9689	1717.9232	1717.9250	-1.08	0	104	1	U	R.ALDAGIVAQAALDVFTK.E + [+15.9949 at A8]
		303	319	859.9689	1717.9232	1717.9250	-1.08	0	73	1	U	R.ALDAGIVAQAALDVFTK.E + [+15.9949 at A8]
		303	319	859.9690	1717.9234	1717.9250	-0.94	0	77	1	U	R.ALDAGIVAQAALDVFTK.E + [+15.9949 at A8]
		303	319	859.9690	1717.9234	1717.9250	-0.94	0	60	1	U	R.ALDAGIVAQAALDVFTK.E + [+15.9949 at A8]
		303	319	573.6484	1717.9235	1717.9250	-0.91	0	61	1	U	R.ALDAGIVAQAALDVFTK.E + [+15.9949 at A8]
		303	319	859.9691	1717.9237	1717.9250	-0.79	0	78	1	U	R.ALDAGIVAQAALDVFTK.E + [+15.9949 at A8]
		303	319	859.9691	1717.9237	1717.9250	-0.79	0	70	1	U	R.ALDAGIVAQAALDVFTK.E + [+15.9949 at A8]
		303	319	859.9691	1717.9237	1717.9250	-0.79	0	82	1	U	R.ALDAGIVAQAALDVFTK.E + [+15.9949 at A8]
		303	319	859.9692	1717.9238	1717.9250	-0.72	0	86	1	U	R.ALDAGIVAQAALDVFTK.E + [+15.9949 at A8]
		303	319	859.9692	1717.9238	1717.9250	-0.72	0	75	1	U	R.ALDAGIVAQAALDVFTK.E + [+15.9949 at A8]
		303	319	859.9693	1717.9240	1717.9250	-0.58	0	47	1	U	R.ALDAGIVAQAALDVFTK.E + [+15.9949 at A8]
		303	319	859.9694	1717.9243	1717.9250	-0.44	0	69	1	U	R.ALDAGIVAQAALDVFTK.E + [+15.9949 at A8]
		303	319	859.9695	1717.9245	1717.9250	-0.30	0	95	1	U	R.ALDAGIVAQAALDVFTK.E + [+15.9949 at A8]
		303	319	573.6488	1717.9246	1717.9250	-0.28	0	61	1	U	R.ALDAGIVAQAALDVFTK.E + [+15.9949 at A8]
		303	319	859.9696	1717.9246	1717.9250	-0.23	0	78	1	U	R.ALDAGIVAQAALDVFTK.E + [+15.9949 at A8]
		303	319	859.9697	1717.9249	1717.9250	-0.082	0	71	1	U	R.ALDAGIVAQAALDVFTK.E + [+15.9949 at A8]
		303	319	573.6490	1717.9251	1717.9250	0.054	0	63	1	U	R.ALDAGIVAQAALDVFTK.E + [+15.9949 at A8]
		303	319	859.9699	1717.9253	1717.9250	0.13	0	45	1	U	R.ALDAGIVAQAALDVFTK.E + [+15.9949 at A11]
		303	319	859.9710	1717.9275	1717.9250	1.41	0	60	1	U	R.ALDAGIVAQAALDVFTK.E + [+15.9949 at A8]
		303	319	859.9737	1717.9328	1717.9250	4.53	0	46	1	U	R.ALDAGIVAQAALDVFTK.E + [+15.9949 at A8]
		303	319	870.9527	1739.8908	1739.8860	2.78	0	36	1	U	R.ALDAGIVAQAALDVFTK.E + [+37.9559 at D13]
		303	319	870.9564	1739.8982	1739.8860	6.98	0	33	1	U	R.ALDAGIVAQAALDVFTK.E + [+37.9559 at D13]
		303	319	870.9570	1739.8995	1739.8860	7.75	0	33	1	U	R.ALDAGIVAQAALDVFTK.E + [+37.9559 at D13]
		303	319	870.9583	1739.9019	1739.8860	9.16	0	34	1	U	R.ALDAGIVAQAALDVFTK.E + [+37.9559 at D13]
		303	319	870.9583	1739.9019	1739.8860	9.16	0	30	1	U	R.ALDAGIVAQAALDVFTK.E + [+37.9559 at D13]
		303	319	870.9593	1739.9040	1739.8860	10.4	0	31	1	U	R.ALDAGIVAQAALDVFTK.E + [+37.9559 at D13]
		311	319	467.7708	933.5271	933.5284	-1.41	0	27	1	U	A.QAALDVFTK.E + [-58.0055 at D5]
		311	319	467.7709	933.5272	933.5284	-1.21	0	25	1	U	A.QAALDVFTK.E + [-58.0055 at D5]
		311	319	496.7732	991.5318	991.4975	34.6	0	50	1	U	A.QAALDVFTK.E + [-0.0364 at C-term K]
		311	319	496.7733	991.5320	991.4975	34.8	0	50	1	U	A.QAALDVFTK.E + [-0.0364 at C-term K]
		312	319	432.7439	863.4732	863.4389	39.7	0	53	1	U	Q.AALDVFTK.E + [-0.0364 at C-term K]
		312	319	432.7439	863.4732	863.4389	39.7	0	57	1	U	Q.AALDVFTK.E + [-0.0364 at C-term K]
		312	319	432.7440	863.4735	863.4753	-2.06	0	52	1	U	Q.AALDVFTK.E
		313	319	397.2283	792.4421	792.4382	4.99	0	35	1	U	A.ALDVFTK.E
		313	319	397.2283	792.4421	792.4382	4.99	0	36	1	U	A.ALDVFTK.E
		326	333	360.8517	1079.5332	1079.5426	-8.73	1	28	1	U	D.SKLVQHER.V + Phospho (ST); [+4.0251 at K2]
		326	333	540.7739	1079.5333	1079.5426	-8.64	1	31	1	U	D.SKLVQHER.V + Phospho (ST); [+4.0251 at K2]
		326	333	540.7739	1079.5333	1079.5426	-8.64	1	32	1	U	D.SKLVQHER.V + Phospho (ST); [+4.0251 at K2]
		326	333	360.8517	1079.5333	1079.5426	-8.62	1	27	1	U	D.SKLVQHER.V + Phospho (ST); [+4.0251 at K2]
		326	333	540.7741	1079.5337	1079.5426	-8.30	1	32	1	U	D.SKLVQHER.V + Phospho (ST); [+4.0251 at K2]
		326	333	540.7744	1079.5343	1079.5426	-7.75	1	30	1	U	D.SKLVQHER.V + Phospho (ST); [+4.0251 at K2]
		326	333	540.7744	1079.5343	1079.5426	-7.75	1	37	1	U	D.SKLVQHER.V + Phospho (ST); [+4.0251 at K2]
		326	333	360.8521	1079.5345	1079.5426	-7.53	1	28	1	U	D.SKLVQHER.V + Phospho (ST); [+4.0251 at K2]
		326	333	540.7746	1079.5346	1079.5426	-7.40	1	37	1	U	D.SKLVQHER.V + Phospho (ST); [+4.0251 at K2]
		326	333	360.8522	1079.5349	1079.5426	-7.20	1	28	1	U	D.SKLVQHER.V + Phospho (ST); [+4.0251 at K2]
		327	333	483.2613	964.5080	964.5454	-38.7	1	37	1	U	S.KLVQHER.V + [+56.0262 at N-term]
		334	339	327.1837	652.3528	652.3544	-2.48	0	57	1	U	R.VTVTPH.L
		334	339	327.1838	652.3530	652.3544	-2.20	0	57	1	U	R.VTVTPH.L
		334	339	327.1839	652.3532	652.3544	-1.84	0	57	1	U	R.VTVTPH.L
		334	339	384.2049	766.3952	766.3839	14.7	0	27	1	U	R.VTVTPH.L + Phospho (ST); [+34.0631 at N-term]
		334	339	384.2051	766.3957	766.3839	15.4	0	33	1	U	R.VTVTPH.L + Phospho (ST); [+34.0631 at N-term]
		334	339	439.7203	877.4259	877.4480	-25.2	0	26	1	U	R.VTVTPH.L + [+225.0936 at N-term]
		334	343	491.2707	980.5268	980.5291	-2.33	0	32	1	U	R.VTVTPHLGAS.T
		334	345	607.3157	1212.6168	1212.6173	-0.40	0	43	1	U	R.VTVTPHLGASTM.E
		334	345	615.3123	1228.6100	1228.6122	-1.82	0	44	1	U	R.VTVTPHLGASTM.E + Oxidation (M)
		334	345	615.3123	1228.6101	1228.6122	-1.72	0	49	1	U	R.VTVTPHLGASTM.E + Oxidation (M)
		377	394	668.0535	2001.1388	2001.1398	-0.50	0	70	1	U	M.VSAEVLTELKPYVVLAEK.L + [+14.0157 at V14]
		377	394	672.7269	2015.1588	2015.1554	1.67	0	64	1	U	M.VSAEVLTELKPYVVLAEK.L + 2 [+14.0157 at L9,L15]
		379	394	908.5214	1815.0283	1815.0393	-6.08	0	71	1	U	S.AEVLTELKPYVVLAEK.L + [+14.0157 at V12]
		381	394	808.4854	1614.9561	1614.9596	-2.15	0	66	1	U	E.VLTELKPYVVLAEK.L + [+14.0157 at V10]
		381	394	539.3261	1614.9563	1614.9596	-2.05	0	65	1	U	E.VLTELKPYVVLAEK.L + [+14.0157 at V10]
		381	394	808.4855	1614.9564	1614.9596	-2.00	0	68	1	U	E.VLTELKPYVVLAEK.L + [+14.0157 at V10]
		381	394	808.4857	1614.9568	1614.9596	-1.77	0	67	1	U	E.VLTELKPYVVLAEK.L + [+14.0157 at V10]
		381	394	539.3263	1614.9570	1614.9596	-1.60	0	60	1	U	E.VLTELKPYVVLAEK.L + [+14.0157 at V10]
		381	394	808.4859	1614.9572	1614.9596	-1.47	0	65	1	U	E.VLTELKPYVVLAEK.L + [+14.0157 at V10]
		381	394	539.3264	1614.9574	1614.9596	-1.36	0	63	1	U	E.VLTELKPYVVLAEK.L + [+14.0157 at V10]
		381	394	539.3267	1614.9582	1614.9596	-0.91	0	63	1	U	E.VLTELKPYVVLAEK.L + [+14.0157 at V10]
		381	394	543.9988	1628.9745	1628.9753	-0.46	0	45	1	U	E.VLTELKPYVVLAEK.L + [+28.0313 at A12]
		381	394	543.9993	1628.9760	1628.9753	0.44	0	42	1	U	E.VLTELKPYVVLAEK.L + [+28.0313 at A12]
		381	394	543.9981	1628.9723	1628.9753	-1.82	0	37	1	U	E.VLTELKPYVVLAEK.L + 2 [+14.0157 at L2,L11]
		383	394	702.4092	1402.8038	1402.8071	-2.38	0	66	1	U	L.TELKPYVVLAEK.L + [+14.0157 at V8]
		383	394	702.4093	1402.8040	1402.8071	-2.21	0	58	1	U	L.TELKPYVVLAEK.L + [+14.0157 at V8]
		383	394	702.4094	1402.8043	1402.8071	-2.04	0	56	1	U	L.TELKPYVVLAEK.L + [+14.0157 at V8]
		383	394	709.4177	1416.8208	1416.8228	-1.43	0	38	1	U	L.TELKPYVVLAEK.L + 2 [+14.0157 at E2,E11]
		383	394	709.4183	1416.8220	1416.8228	-0.57	0	36	1	U	L.TELKPYVVLAEK.L + 2 [+14.0157 at E2,E11]
		385	394	391.9121	1172.7145	1172.7169	-2.02	0	47	1	U	E.LKPYVVLAEK.L + [+14.0157 at V6]
		387	394	466.7749	931.5352	931.5379	-2.80	0	56	1	U	K.PYVVLAEK.L + [+14.0157 at V4]
		387	394	466.7750	931.5354	931.5379	-2.61	0	51	1	U	K.PYVVLAEK.L + [+14.0157 at V4]
		387	394	466.7751	931.5357	931.5379	-2.26	0	56	1	U	K.PYVVLAEK.L + [+14.0157 at V4]
		387	394	466.7752	931.5359	931.5379	-2.07	0	55	1	U	K.PYVVLAEK.L + [+14.0157 at V4]
		387	394	466.7760	931.5374	931.5379	-0.44	0	45	1	U	K.PYVVLAEK.L + [+14.0157 at V4]
		387	394	472.7749	943.5353	943.5379	-2.70	0	28	1	U	K.PYVVLAEK.L + [+26.0157 at A6]
		389	394	336.7170	671.4195	671.4218	-3.31	0	29	1	U	Y.VVLAEK.L + [+14.0156 at N-term]
		389	394	336.7171	671.4197	671.4218	-3.07	0	39	1	U	Y.VVLAEK.L + [+14.0157 at V2]
		398	410	599.8591	1197.7036	1197.6718	26.6	0	69	1	U	R.LAVQLVAGGSGVK.N + [-0.0364 at C-term K]
		398	410	599.8593	1197.7041	1197.6718	27.0	0	75	1	U	R.LAVQLVAGGSGVK.N + [-0.0364 at C-term K]
		398	410	599.8599	1197.7052	1197.6718	27.9	0	75	1	U	R.LAVQLVAGGSGVK.N + [-0.0364 at C-term K]
		398	410	599.8600	1197.7054	1197.6718	28.1	0	75	1	U	R.LAVQLVAGGSGVK.N + [-0.0364 at C-term K]
		398	410	599.8601	1197.7057	1197.6718	28.3	0	66	1	U	R.LAVQLVAGGSGVK.N + [-0.0364 at C-term K]
		398	410	599.8601	1197.7057	1197.6718	28.3	0	74	1	U	R.LAVQLVAGGSGVK.N + [-0.0364 at C-term K]
		398	410	599.8601	1197.7057	1197.6718	28.3	0	75	1	U	R.LAVQLVAGGSGVK.N + [-0.0364 at C-term K]
		398	410	599.8601	1197.7057	1197.6718	28.3	0	76	1	U	R.LAVQLVAGGSGVK.N + [-0.0364 at C-term K]
		398	410	599.8602	1197.7058	1197.6718	28.4	0	67	1	U	R.LAVQLVAGGSGVK.N + [-0.0364 at C-term K]
		398	410	599.8602	1197.7059	1197.6718	28.5	0	71	1	U	R.LAVQLVAGGSGVK.N + [-0.0364 at C-term K]
		398	410	599.8602	1197.7059	1197.6718	28.5	0	73	1	U	R.LAVQLVAGGSGVK.N + [-0.0364 at C-term K]
		398	410	599.8602	1197.7059	1197.6718	28.5	0	88	1	U	R.LAVQLVAGGSGVK.N + [-0.0364 at C-term K]
		398	410	599.8603	1197.7060	1197.6718	28.6	0	76	1	U	R.LAVQLVAGGSGVK.N + [-0.0364 at C-term K]
		398	410	599.8603	1197.7060	1197.6718	28.6	0	75	1	U	R.LAVQLVAGGSGVK.N + [-0.0364 at C-term K]
		398	410	599.8603	1197.7060	1197.6718	28.6	0	78	1	U	R.LAVQLVAGGSGVK.N + [-0.0364 at C-term K]
		398	410	599.8604	1197.7061	1197.6718	28.7	0	75	1	U	R.LAVQLVAGGSGVK.N + [-0.0364 at C-term K]
		398	410	599.8604	1197.7061	1197.6718	28.7	0	77	1	U	R.LAVQLVAGGSGVK.N + [-0.0364 at C-term K]
		398	410	599.8604	1197.7063	1197.6718	28.8	0	75	1	U	R.LAVQLVAGGSGVK.N + [-0.0364 at C-term K]
		398	410	599.8604	1197.7063	1197.6718	28.8	0	75	1	U	R.LAVQLVAGGSGVK.N + [-0.0364 at C-term K]
		398	410	599.8604	1197.7063	1197.6718	28.8	0	75	1	U	R.LAVQLVAGGSGVK.N + [-0.0364 at C-term K]
		398	410	599.8604	1197.7063	1197.6718	28.8	0	90	1	U	R.LAVQLVAGGSGVK.N + [-0.0364 at C-term K]
		398	410	599.8605	1197.7064	1197.6718	28.9	0	75	1	U	R.LAVQLVAGGSGVK.N + [-0.0364 at C-term K]
		398	410	599.8605	1197.7064	1197.6718	28.9	0	74	1	U	R.LAVQLVAGGSGVK.N + [-0.0364 at C-term K]
		398	410	599.8605	1197.7065	1197.6718	29.0	0	75	1	U	R.LAVQLVAGGSGVK.N + [-0.0364 at C-term K]
		398	410	599.8606	1197.7066	1197.6718	29.1	0	74	1	U	R.LAVQLVAGGSGVK.N + [-0.0364 at C-term K]
		398	410	599.8606	1197.7066	1197.6718	29.1	0	76	1	U	R.LAVQLVAGGSGVK.N + [-0.0364 at C-term K]
		398	410	599.8607	1197.7068	1197.6718	29.2	0	75	1	U	R.LAVQLVAGGSGVK.N + [-0.0364 at C-term K]
		398	410	599.8607	1197.7068	1197.6718	29.2	0	75	1	U	R.LAVQLVAGGSGVK.N + [-0.0364 at C-term K]
		398	410	599.8607	1197.7069	1197.6718	29.3	0	70	1	U	R.LAVQLVAGGSGVK.N + [-0.0364 at C-term K]
		398	410	599.8607	1197.7069	1197.6718	29.3	0	74	1	U	R.LAVQLVAGGSGVK.N + [-0.0364 at C-term K]
		398	410	599.8608	1197.7070	1197.6718	29.4	0	77	1	U	R.LAVQLVAGGSGVK.N + [-0.0364 at C-term K]
		398	410	599.8608	1197.7071	1197.6718	29.5	0	70	1	U	R.LAVQLVAGGSGVK.N + [-0.0364 at C-term K]
		398	410	599.8608	1197.7071	1197.6718	29.5	0	69	1	U	R.LAVQLVAGGSGVK.N + [-0.0364 at C-term K]
		398	410	599.8608	1197.7071	1197.6718	29.5	0	80	1	U	R.LAVQLVAGGSGVK.N + [-0.0364 at C-term K]
		398	410	599.8611	1197.7076	1197.6718	29.9	0	75	1	U	R.LAVQLVAGGSGVK.N + [-0.0364 at C-term K]
		398	410	599.8611	1197.7076	1197.6718	29.9	0	72	1	U	R.LAVQLVAGGSGVK.N + [-0.0364 at C-term K]
		398	410	599.8611	1197.7077	1197.6718	30.1	0	73	1	U	R.LAVQLVAGGSGVK.N + [-0.0364 at C-term K]
		398	410	599.8613	1197.7080	1197.6718	30.3	0	73	1	U	R.LAVQLVAGGSGVK.N + [-0.0364 at C-term K]
		398	410	599.8613	1197.7081	1197.6718	30.4	0	74	1	U	R.LAVQLVAGGSGVK.N + [-0.0364 at C-term K]
		398	410	599.8614	1197.7083	1197.6718	30.6	0	22	1	U	R.LAVQLVAGGSGVK.N + [-0.0364 at C-term K]
		398	410	599.8615	1197.7085	1197.6718	30.7	0	68	1	U	R.LAVQLVAGGSGVK.N + [-0.0364 at C-term K]
		398	410	599.8616	1197.7086	1197.6718	30.8	0	70	1	U	R.LAVQLVAGGSGVK.N + [-0.0364 at C-term K]
		398	410	599.8619	1197.7092	1197.6718	31.3	0	75	1	U	R.LAVQLVAGGSGVK.N + [-0.0364 at C-term K]
		398	410	599.8619	1197.7092	1197.6718	31.3	0	76	1	U	R.LAVQLVAGGSGVK.N + [-0.0364 at C-term K]
		398	410	400.2437	1197.7093	1197.6718	31.4	0	23	1	U	R.LAVQLVAGGSGVK.N + [-0.0364 at C-term K]
		398	410	600.3516	1198.6886	1198.6921	-2.98	0	76	1	U	R.LAVQLVAGGSGVK.N + [+0.9840 at Q4]
		398	410	607.3599	1212.7052	1212.7078	-2.17	0	68	1	U	R.LAVQLVAGGSGVK.N + [+14.9997 at Q4]
		398	410	607.3599	1212.7052	1212.7078	-2.17	0	65	1	U	R.LAVQLVAGGSGVK.N + [+14.9997 at Q4]
		398	410	607.3601	1212.7055	1212.7078	-1.85	0	69	1	U	R.LAVQLVAGGSGVK.N + [+14.9997 at Q4]
		398	410	607.3608	1212.7070	1212.7078	-0.65	0	78	1	U	R.LAVQLVAGGSGVK.N + [+14.9997 at Q4]
		398	410	607.8554	1213.6961	1213.6667	24.3	0	26	1	U	R.LAVQLVAGGSGVK.N + [+15.9585 at V6]
		398	410	607.8568	1213.6989	1213.6667	26.6	0	38	1	U	R.LAVQLVAGGSGVK.N + [+15.9585 at V6]
		398	410	610.8494	1219.6842	1219.6901	-4.82	0	37	1	U	R.LAVQLVAGGSGVK.N + [+21.9819 at C-term]
		398	410	610.8498	1219.6850	1219.6901	-4.13	0	49	1	U	R.LAVQLVAGGSGVK.N + [+21.9819 at C-term]
		398	410	610.8498	1219.6851	1219.6901	-4.03	0	51	1	U	R.LAVQLVAGGSGVK.N + [+21.9819 at C-term]
		398	410	610.8500	1219.6854	1219.6901	-3.82	0	51	1	U	R.LAVQLVAGGSGVK.N + [+21.9819 at C-term]
		398	410	610.8500	1219.6854	1219.6901	-3.82	0	51	1	U	R.LAVQLVAGGSGVK.N + [+21.9819 at C-term]
		398	410	610.8502	1219.6858	1219.6901	-3.52	0	53	1	U	R.LAVQLVAGGSGVK.N + [+21.9819 at C-term]
		398	410	610.8502	1219.6858	1219.6901	-3.52	0	51	1	U	R.LAVQLVAGGSGVK.N + [+21.9819 at C-term]
		398	410	610.8503	1219.6860	1219.6901	-3.32	0	53	1	U	R.LAVQLVAGGSGVK.N + [+21.9819 at C-term]
		398	410	610.8505	1219.6864	1219.6901	-3.03	0	28	1	U	R.LAVQLVAGGSGVK.N + [+21.9819 at C-term]
		398	410	610.8505	1219.6865	1219.6901	-2.93	0	41	1	U	R.LAVQLVAGGSGVK.N + [+21.9819 at C-term]
		398	410	610.8506	1219.6866	1219.6901	-2.82	0	51	1	U	R.LAVQLVAGGSGVK.N + [+21.9819 at C-term]
		398	410	610.8506	1219.6867	1219.6901	-2.72	0	31	1	U	R.LAVQLVAGGSGVK.N + [+21.9819 at C-term]
		398	410	610.8508	1219.6871	1219.6901	-2.42	0	29	1	U	R.LAVQLVAGGSGVK.N + [+21.9819 at C-term]
		398	410	610.8511	1219.6877	1219.6901	-1.91	0	29	1	U	R.LAVQLVAGGSGVK.N + [+21.9819 at C-term]
		398	410	610.8513	1219.6881	1219.6901	-1.62	0	42	1	U	R.LAVQLVAGGSGVK.N + [+21.9819 at C-term]
		398	410	612.8679	1223.7212	1223.7238	-2.14	0	73	1	U	R.LAVQLVAGGSGVK.N + [+26.0157 at A2]
		398	410	612.8679	1223.7213	1223.7238	-2.04	0	57	1	U	R.LAVQLVAGGSGVK.N + [+26.0157 at A2]
		398	410	612.8683	1223.7221	1223.7238	-1.34	0	62	1	U	R.LAVQLVAGGSGVK.N + [+26.0157 at A2]
		398	410	620.8656	1239.7166	1239.7187	-1.65	0	62	1	U	R.LAVQLVAGGSGVK.N + [+42.0106 at N-term]
		404	413	512.7540	1023.4935	1023.5114	-17.5	1	29	1	U	V.AGGSGVKNAK.I + Phospho (ST); 2 [+28.0313 at K7,K10]
		421	428	453.7058	905.3971	905.4090	-13.2	0	29	1	U	R.ATDDLDTR.L
		421	428	453.7101	905.4057	905.4090	-3.66	0	55	1	U	R.ATDDLDTR.L
		421	428	453.7102	905.4058	905.4090	-3.59	0	55	1	U	R.ATDDLDTR.L
		421	428	453.7103	905.4060	905.4090	-3.31	0	55	1	U	R.ATDDLDTR.L
		421	428	453.7104	905.4062	905.4090	-3.11	0	55	1	U	R.ATDDLDTR.L
		421	428	453.7105	905.4065	905.4090	-2.78	0	55	1	U	R.ATDDLDTR.L
		421	428	453.7106	905.4066	905.4090	-2.71	0	59	1	U	R.ATDDLDTR.L
		421	428	453.7107	905.4069	905.4090	-2.38	0	55	1	U	R.ATDDLDTR.L
		421	428	453.7108	905.4071	905.4090	-2.09	0	38	1	U	R.ATDDLDTR.L
		421	428	453.7109	905.4073	905.4090	-1.89	0	55	1	U	R.ATDDLDTR.L
		421	428	453.7110	905.4074	905.4090	-1.76	0	60	1	U	R.ATDDLDTR.L
		421	428	453.7111	905.4076	905.4090	-1.63	0	55	1	U	R.ATDDLDTR.L
		421	428	453.7111	905.4077	905.4090	-1.43	0	60	1	U	R.ATDDLDTR.L
		421	428	453.7113	905.4080	905.4090	-1.10	0	54	1	U	R.ATDDLDTR.L
		421	428	453.7113	905.4081	905.4090	-1.03	0	59	1	U	R.ATDDLDTR.L
		421	428	453.7114	905.4082	905.4090	-0.97	0	44	1	U	R.ATDDLDTR.L
		421	428	453.7115	905.4085	905.4090	-0.61	0	39	1	U	R.ATDDLDTR.L
		421	428	453.7117	905.4088	905.4090	-0.28	0	45	1	U	R.ATDDLDTR.L
		421	428	453.7117	905.4088	905.4090	-0.28	0	53	1	U	R.ATDDLDTR.L
		421	428	453.7117	905.4088	905.4090	-0.21	0	53	1	U	R.ATDDLDTR.L
		421	428	453.7117	905.4088	905.4090	-0.21	0	45	1	U	R.ATDDLDTR.L
		421	428	453.7120	905.4094	905.4090	0.40	0	47	1	U	R.ATDDLDTR.L
		421	428	453.7120	905.4095	905.4090	0.54	0	54	1	U	R.ATDDLDTR.L
		421	428	453.7120	905.4095	905.4090	0.54	0	30	1	U	R.ATDDLDTR.L
		421	428	453.7121	905.4096	905.4090	0.67	0	64	1	U	R.ATDDLDTR.L
		421	428	453.7123	905.4101	905.4090	1.20	0	42	1	U	R.ATDDLDTR.L
		421	428	453.7132	905.4118	905.4090	3.03	0	59	1	U	R.ATDDLDTR.L
		421	428	466.7182	931.4218	931.4247	-3.12	0	54	1	U	R.ATDDLDTR.L + [+26.0157 at N-term A]
		421	428	466.7184	931.4222	931.4247	-2.67	0	54	1	U	R.ATDDLDTR.L + [+26.0157 at N-term A]
		421	428	472.6835	943.3524	943.3649	-13.3	0	21	1	U	R.ATDDLDTR.L + [+37.9559 at D6]
		421	428	474.7158	947.4171	947.4196	-2.59	0	59	1	U	R.ATDDLDTR.L + [+42.0106 at N-term]
		421	428	474.7160	947.4175	947.4196	-2.21	0	59	1	U	R.ATDDLDTR.L + [+42.0106 at N-term]
		421	428	474.7163	947.4179	947.4196	-1.74	0	43	1	U	R.ATDDLDTR.L + [+42.0106 at N-term]
		421	428	482.7136	963.4127	963.4145	-1.84	0	35	1	U	R.ATDDLDTR.L + [+58.0055 at N-term]
		421	428	482.7140	963.4134	963.4145	-1.20	0	35	1	U	R.ATDDLDTR.L + [+58.0055 at N-term]
		421	428	497.7193	993.4241	993.4073	16.9	0	24	1	U	R.ATDDLDTR.L + [+87.9983 at N-term]
		422	428	418.1923	834.3701	834.3719	-2.21	0	68	1	U	A.TDDLDTR.L
		422	428	418.1923	834.3701	834.3719	-2.14	0	42	1	U	A.TDDLDTR.L
		423	428	489.7212	977.4278	977.4257	2.17	0	27	1	U	T.DDLDTR.L + [+244.1015 at N-term]
		423	428	489.7212	977.4278	977.4257	2.17	0	27	1	U	T.DDLDTR.L + [+244.1015 at N-term]
		423	428	489.7212	977.4278	977.4257	2.17	0	27	1	U	T.DDLDTR.L + [+244.1015 at N-term]
		423	428	489.7214	977.4283	977.4257	2.62	0	28	1	U	T.DDLDTR.L + [+244.1015 at N-term]
		437	448	659.8476	1317.6806	1317.6816	-0.74	0	28	1	U	K.GIIEPISDVYVN.L
		437	448	670.8388	1339.6631	1339.6425	15.4	0	33	1	U	K.GIIEPISDVYVN.L + Phospho (ST); [-58.0055 at D8]
		437	456	760.0687	2277.1844	2277.0970	38.4	0	43	1	U	K.GIIEPISDVYVNLVNADFTA.K + Phospho (ST); [+48.0364 at D17]
		437	457	1139.5946	2277.1746	2277.1529	9.56	0	35	1	U	K.GIIEPISDVYVNLVNADFTAK.Q + [-0.0364 at C-term K]
		437	457	1139.5964	2277.1783	2277.1529	11.2	0	33	1	U	K.GIIEPISDVYVNLVNADFTAK.Q + [-0.0364 at C-term K]
		437	457	1139.6013	2277.1881	2277.1529	15.5	0	65	1	U	K.GIIEPISDVYVNLVNADFTAK.Q + [-0.0364 at C-term K]
		437	457	760.0702	2277.1889	2277.1529	15.8	0	64	1	U	K.GIIEPISDVYVNLVNADFTAK.Q + [-0.0364 at C-term K]
		437	457	1139.6019	2277.1893	2277.1529	16.0	0	76	1	U	K.GIIEPISDVYVNLVNADFTAK.Q + [-0.0364 at C-term K]
		437	457	1139.6023	2277.1900	2277.1529	16.3	0	103	1	U	K.GIIEPISDVYVNLVNADFTAK.Q + [-0.0364 at C-term K]
		437	457	767.3994	2299.1762	2299.1712	2.18	0	49	1	U	K.GIIEPISDVYVNLVNADFTAK.Q + [+21.9819 at D8]
		439	457	1139.5957	2277.1768	2277.1317	19.8	0	31	1	U	I.IEPISDVYVNLVNADFTAK.Q + [+170.0480 at N-term]
		447	457	596.3253	1190.6360	1190.5932	36.0	0	41	1	U	Y.VNLVNADFTAK.Q + [-0.0364 at C-term K]
		449	457	489.7657	977.5168	977.4818	35.8	0	51	1	U	N.LVNADFTAK.Q + [-0.0364 at C-term K]
		449	457	489.7657	977.5168	977.4818	35.8	0	51	1	U	N.LVNADFTAK.Q + [-0.0364 at C-term K]
		463	467	317.1635	632.3125	632.3129	-0.73	0	44	1	U	R.LSEER.V
		463	467	317.1636	632.3126	632.3129	-0.54	0	44	1	U	R.LSEER.V
		463	467	317.1637	632.3128	632.3129	-0.12	0	44	1	U	R.LSEER.V
		463	467	324.1701	646.3257	646.3286	-4.42	0	44	1	U	R.LSEER.V + [+14.0157 at E4]
		463	467	324.1703	646.3260	646.3286	-3.95	0	38	1	U	R.LSEER.V + [+14.0157 at E3]
		463	467	324.1703	646.3261	646.3286	-3.86	0	44	1	U	R.LSEER.V + [+14.0157 at E4]
		463	467	324.1704	646.3262	646.3286	-3.67	0	38	1	U	R.LSEER.V + [+14.0157 at E3]
		463	467	324.1707	646.3269	646.3286	-2.53	0	43	1	U	R.LSEER.V + [+14.0157 at E3]
		463	467	324.1713	646.3280	646.3286	-0.83	0	43	1	U	R.LSEER.V + [+14.0157 at E4]
		463	467	324.1716	646.3286	646.3286	0.0077	0	43	1	U	R.LSEER.V + [+14.0157 at E4]
		463	467	331.1787	660.3429	660.3442	-2.05	0	38	1	U	R.LSEER.V + [+28.0313 at E3]
		463	467	331.1789	660.3432	660.3442	-1.51	0	38	1	U	R.LSEER.V + [+28.0313 at E3]
		463	467	331.1784	660.3422	660.3442	-3.07	0	43	1	U	R.LSEER.V + 2 [+14.0157 at E3,E4]
		463	467	331.1785	660.3425	660.3442	-2.62	0	43	1	U	R.LSEER.V + 2 [+14.0157 at E3,E4]
		463	467	338.1679	674.3213	674.3235	-3.20	0	27	1	U	R.LSEER.V + [+42.0106 at N-term]
		463	467	338.1682	674.3219	674.3235	-2.40	0	21	1	U	R.LSEER.V + [+42.0106 at N-term]
		463	467	338.1683	674.3220	674.3235	-2.13	0	27	1	U	R.LSEER.V + [+42.0106 at N-term]
		483	491	487.2680	972.5215	972.5240	-2.56	0	49	1	U	T.VQLSNVESK.F + [-30.0106 at S4]
		492	503	620.8038	1239.5931	1239.5619	25.2	0	84	1	U	K.FASSLSESGEVK.V + [-0.0364 at C-term K]
		492	503	620.8039	1239.5932	1239.5619	25.3	0	82	1	U	K.FASSLSESGEVK.V + [-0.0364 at C-term K]
		492	503	620.8039	1239.5932	1239.5619	25.3	0	74	1	U	K.FASSLSESGEVK.V + [-0.0364 at C-term K]
		492	503	620.8039	1239.5932	1239.5619	25.3	0	83	1	U	K.FASSLSESGEVK.V + [-0.0364 at C-term K]
		492	503	620.8042	1239.5938	1239.5619	25.8	0	85	1	U	K.FASSLSESGEVK.V + [-0.0364 at C-term K]
		492	503	620.8043	1239.5940	1239.5619	25.9	0	72	1	U	K.FASSLSESGEVK.V + [-0.0364 at C-term K]
		492	503	620.8044	1239.5943	1239.5619	26.2	0	84	1	U	K.FASSLSESGEVK.V + [-0.0364 at C-term K]
		492	503	620.8045	1239.5944	1239.5619	26.3	0	83	1	U	K.FASSLSESGEVK.V + [-0.0364 at C-term K]
		492	503	620.8046	1239.5946	1239.5619	26.4	0	83	1	U	K.FASSLSESGEVK.V + [-0.0364 at C-term K]
		492	503	620.8046	1239.5947	1239.5619	26.5	0	78	1	U	K.FASSLSESGEVK.V + [-0.0364 at C-term K]
		492	503	620.8046	1239.5947	1239.5619	26.5	0	78	1	U	K.FASSLSESGEVK.V + [-0.0364 at C-term K]
		492	503	620.8047	1239.5948	1239.5619	26.6	0	85	1	U	K.FASSLSESGEVK.V + [-0.0364 at C-term K]
		492	503	620.8048	1239.5949	1239.5619	26.7	0	77	1	U	K.FASSLSESGEVK.V + [-0.0364 at C-term K]
		492	503	620.8048	1239.5949	1239.5619	26.7	0	82	1	U	K.FASSLSESGEVK.V + [-0.0364 at C-term K]
		492	503	620.8048	1239.5949	1239.5619	26.7	0	69	1	U	K.FASSLSESGEVK.V + [-0.0364 at C-term K]
		492	503	620.8048	1239.5951	1239.5619	26.8	0	85	1	U	K.FASSLSESGEVK.V + [-0.0364 at C-term K]
		492	503	620.8048	1239.5951	1239.5619	26.8	0	85	1	U	K.FASSLSESGEVK.V + [-0.0364 at C-term K]
		492	503	620.8048	1239.5951	1239.5619	26.8	0	80	1	U	K.FASSLSESGEVK.V + [-0.0364 at C-term K]
		492	503	620.8048	1239.5951	1239.5619	26.8	0	77	1	U	K.FASSLSESGEVK.V + [-0.0364 at C-term K]
		492	503	620.8049	1239.5952	1239.5619	26.9	0	83	1	U	K.FASSLSESGEVK.V + [-0.0364 at C-term K]
		492	503	620.8049	1239.5952	1239.5619	26.9	0	73	1	U	K.FASSLSESGEVK.V + [-0.0364 at C-term K]
		492	503	620.8049	1239.5952	1239.5619	26.9	0	72	1	U	K.FASSLSESGEVK.V + [-0.0364 at C-term K]
		492	503	620.8049	1239.5953	1239.5619	26.9	0	76	1	U	K.FASSLSESGEVK.V + [-0.0364 at C-term K]
		492	503	620.8051	1239.5955	1239.5619	27.1	0	80	1	U	K.FASSLSESGEVK.V + [-0.0364 at C-term K]
		492	503	620.8051	1239.5955	1239.5619	27.1	0	77	1	U	K.FASSLSESGEVK.V + [-0.0364 at C-term K]
		492	503	620.8051	1239.5955	1239.5619	27.1	0	72	1	U	K.FASSLSESGEVK.V + [-0.0364 at C-term K]
		492	503	620.8051	1239.5957	1239.5619	27.2	0	77	1	U	K.FASSLSESGEVK.V + [-0.0364 at C-term K]
		492	503	620.8051	1239.5957	1239.5619	27.2	0	79	1	U	K.FASSLSESGEVK.V + [-0.0364 at C-term K]
		492	503	620.8052	1239.5958	1239.5619	27.4	0	76	1	U	K.FASSLSESGEVK.V + [-0.0364 at C-term K]
		492	503	620.8052	1239.5958	1239.5619	27.4	0	83	1	U	K.FASSLSESGEVK.V + [-0.0364 at C-term K]
		492	503	620.8052	1239.5958	1239.5619	27.4	0	86	1	U	K.FASSLSESGEVK.V + [-0.0364 at C-term K]
		492	503	620.8052	1239.5958	1239.5619	27.4	0	85	1	U	K.FASSLSESGEVK.V + [-0.0364 at C-term K]
		492	503	620.8052	1239.5959	1239.5619	27.4	0	85	1	U	K.FASSLSESGEVK.V + [-0.0364 at C-term K]
		492	503	620.8053	1239.5960	1239.5619	27.5	0	73	1	U	K.FASSLSESGEVK.V + [-0.0364 at C-term K]
		492	503	620.8054	1239.5962	1239.5619	27.6	0	85	1	U	K.FASSLSESGEVK.V + [-0.0364 at C-term K]
		492	503	620.8054	1239.5962	1239.5619	27.6	0	75	1	U	K.FASSLSESGEVK.V + [-0.0364 at C-term K]
		492	503	620.8054	1239.5963	1239.5619	27.7	0	76	1	U	K.FASSLSESGEVK.V + [-0.0364 at C-term K]
		492	503	620.8055	1239.5964	1239.5619	27.8	0	74	1	U	K.FASSLSESGEVK.V + [-0.0364 at C-term K]
		492	503	620.8055	1239.5964	1239.5619	27.8	0	85	1	U	K.FASSLSESGEVK.V + [-0.0364 at C-term K]
		492	503	620.8055	1239.5965	1239.5619	27.9	0	74	1	U	K.FASSLSESGEVK.V + [-0.0364 at C-term K]
		492	503	620.8055	1239.5965	1239.5619	27.9	0	77	1	U	K.FASSLSESGEVK.V + [-0.0364 at C-term K]
		492	503	620.8056	1239.5966	1239.5619	28.0	0	72	1	U	K.FASSLSESGEVK.V + [-0.0364 at C-term K]
		492	503	620.8056	1239.5966	1239.5619	28.0	0	80	1	U	K.FASSLSESGEVK.V + [-0.0364 at C-term K]
		492	503	620.8056	1239.5966	1239.5619	28.0	0	77	1	U	K.FASSLSESGEVK.V + [-0.0364 at C-term K]
		492	503	620.8056	1239.5966	1239.5619	28.0	0	83	1	U	K.FASSLSESGEVK.V + [-0.0364 at C-term K]
		492	503	620.8057	1239.5969	1239.5619	28.2	0	84	1	U	K.FASSLSESGEVK.V + [-0.0364 at C-term K]
		492	503	620.8057	1239.5969	1239.5619	28.2	0	78	1	U	K.FASSLSESGEVK.V + [-0.0364 at C-term K]
		492	503	620.8058	1239.5970	1239.5619	28.3	0	46	1	U	K.FASSLSESGEVK.V + [-0.0364 at C-term K]
		492	503	620.8058	1239.5970	1239.5619	28.3	0	72	1	U	K.FASSLSESGEVK.V + [-0.0364 at C-term K]
		492	503	620.8058	1239.5971	1239.5619	28.4	0	75	1	U	K.FASSLSESGEVK.V + [-0.0364 at C-term K]
		492	503	620.8059	1239.5973	1239.5619	28.5	0	69	1	U	K.FASSLSESGEVK.V + [-0.0364 at C-term K]
		492	503	620.8060	1239.5974	1239.5619	28.6	0	70	1	U	K.FASSLSESGEVK.V + [-0.0364 at C-term K]
		492	503	620.8060	1239.5974	1239.5619	28.6	0	71	1	U	K.FASSLSESGEVK.V + [-0.0364 at C-term K]
		492	503	620.8060	1239.5975	1239.5619	28.7	0	77	1	U	K.FASSLSESGEVK.V + [-0.0364 at C-term K]
		492	503	620.8060	1239.5975	1239.5619	28.7	0	73	1	U	K.FASSLSESGEVK.V + [-0.0364 at C-term K]
		492	503	620.8060	1239.5975	1239.5619	28.7	0	77	1	U	K.FASSLSESGEVK.V + [-0.0364 at C-term K]
		492	503	620.8062	1239.5977	1239.5619	28.9	0	72	1	U	K.FASSLSESGEVK.V + [-0.0364 at C-term K]
		492	503	620.8063	1239.5980	1239.5619	29.1	0	70	1	U	K.FASSLSESGEVK.V + [-0.0364 at C-term K]
		492	503	620.8063	1239.5981	1239.5619	29.2	0	71	1	U	K.FASSLSESGEVK.V + [-0.0364 at C-term K]
		492	503	620.8066	1239.5986	1239.5619	29.6	0	82	1	U	K.FASSLSESGEVK.V + [-0.0364 at C-term K]
		492	503	620.8068	1239.5990	1239.5619	29.9	0	77	1	U	K.FASSLSESGEVK.V + [-0.0364 at C-term K]
		492	503	620.8068	1239.5990	1239.5619	29.9	0	73	1	U	K.FASSLSESGEVK.V + [-0.0364 at C-term K]
		492	503	620.8068	1239.5991	1239.5619	30.0	0	72	1	U	K.FASSLSESGEVK.V + [-0.0364 at C-term K]
		492	503	620.8070	1239.5993	1239.5619	30.2	0	69	1	U	K.FASSLSESGEVK.V + [-0.0364 at C-term K]
		492	503	620.8071	1239.5997	1239.5619	30.5	0	76	1	U	K.FASSLSESGEVK.V + [-0.0364 at C-term K]
		492	503	627.8113	1253.6081	1253.6139	-4.63	0	79	1	U	K.FASSLSESGEVK.V + [+14.0157 at G9]
		492	503	627.8120	1253.6095	1253.6139	-3.56	0	85	1	U	K.FASSLSESGEVK.V + [+14.0157 at G9]
		492	503	627.8122	1253.6098	1253.6139	-3.28	0	89	1	U	K.FASSLSESGEVK.V + [+14.0157 at G9]
		492	503	627.8123	1253.6100	1253.6139	-3.17	0	94	1	U	K.FASSLSESGEVK.V + [+14.0157 at G9]
		492	503	627.8125	1253.6104	1253.6139	-2.78	0	91	1	U	K.FASSLSESGEVK.V + [+14.0157 at G9]
		492	503	627.8125	1253.6104	1253.6139	-2.78	0	96	1	U	K.FASSLSESGEVK.V + [+14.0157 at G9]
		492	503	627.8129	1253.6112	1253.6139	-2.19	0	78	1	U	K.FASSLSESGEVK.V + [+14.0157 at C-term K]
		492	503	627.8129	1253.6112	1253.6139	-2.19	0	87	1	U	K.FASSLSESGEVK.V + [+14.0157 at E10]
		492	503	627.8130	1253.6115	1253.6139	-1.91	0	82	1	U	K.FASSLSESGEVK.V + [+14.0157 at G9]
		492	503	627.8130	1253.6115	1253.6139	-1.91	0	86	1	U	K.FASSLSESGEVK.V + [+14.0157 at G9]
		492	503	627.8130	1253.6115	1253.6139	-1.91	0	81	1	U	K.FASSLSESGEVK.V + [+14.0157 at G9]
		492	503	627.8131	1253.6117	1253.6139	-1.81	0	86	1	U	K.FASSLSESGEVK.V + [+14.0157 at G9]
		492	503	627.8131	1253.6117	1253.6139	-1.81	0	92	1	U	K.FASSLSESGEVK.V + [+14.0157 at G9]
		492	503	627.8132	1253.6118	1253.6139	-1.71	0	94	1	U	K.FASSLSESGEVK.V + [+14.0157 at G9]
		492	503	627.8132	1253.6118	1253.6139	-1.71	0	87	1	U	K.FASSLSESGEVK.V + [+14.0157 at E10]
		492	503	627.8132	1253.6118	1253.6139	-1.71	0	94	1	U	K.FASSLSESGEVK.V + [+14.0157 at G9]
		492	503	627.8132	1253.6119	1253.6139	-1.62	0	96	1	U	K.FASSLSESGEVK.V + [+14.0157 at G9]
		492	503	627.8133	1253.6120	1253.6139	-1.52	0	91	1	U	K.FASSLSESGEVK.V + [+14.0157 at G9]
		492	503	627.8134	1253.6121	1253.6139	-1.43	0	96	1	U	K.FASSLSESGEVK.V + [+14.0157 at G9]
		492	503	627.8134	1253.6123	1253.6139	-1.32	0	89	1	U	K.FASSLSESGEVK.V + [+14.0157 at G9]
		492	503	627.8135	1253.6125	1253.6139	-1.12	0	88	1	U	K.FASSLSESGEVK.V + [+14.0157 at G9]
		492	503	627.8136	1253.6126	1253.6139	-1.03	0	77	1	U	K.FASSLSESGEVK.V + [+14.0157 at C-term K]
		492	503	627.8137	1253.6128	1253.6139	-0.93	0	88	1	U	K.FASSLSESGEVK.V + [+14.0157 at G9]
		492	503	627.8137	1253.6129	1253.6139	-0.84	0	34	1	U	K.FASSLSESGEVK.V + [+14.0157 at E7]
		492	503	627.8138	1253.6130	1253.6139	-0.74	0	83	1	U	K.FASSLSESGEVK.V + [+14.0157 at G9]
		492	503	627.8138	1253.6130	1253.6139	-0.74	0	83	1	U	K.FASSLSESGEVK.V + [+14.0157 at G9]
		492	503	627.8138	1253.6130	1253.6139	-0.74	0	68	1	U	K.FASSLSESGEVK.V + [+14.0157 at G9]
		492	503	627.8140	1253.6135	1253.6139	-0.34	0	62	1	U	K.FASSLSESGEVK.V + [+14.0157 at G9]
		492	503	627.8141	1253.6136	1253.6139	-0.25	0	87	1	U	K.FASSLSESGEVK.V + [+14.0157 at G9]
		492	503	627.8143	1253.6140	1253.6139	0.041	0	73	1	U	K.FASSLSESGEVK.V + [+14.0157 at E10]
		492	503	627.8144	1253.6143	1253.6139	0.33	0	64	1	U	K.FASSLSESGEVK.V + [+14.0157 at G9]
		492	503	627.8144	1253.6143	1253.6139	0.33	0	74	1	U	K.FASSLSESGEVK.V + [+14.0157 at E10]
		492	503	627.8145	1253.6145	1253.6139	0.42	0	72	1	U	K.FASSLSESGEVK.V + [+14.0157 at G9]
		492	503	627.8147	1253.6148	1253.6139	0.73	0	91	1	U	K.FASSLSESGEVK.V + [+14.0157 at G9]
		492	503	627.8147	1253.6148	1253.6139	0.73	0	30	1	U	K.FASSLSESGEVK.V + [+14.0157 at C-term K]
		492	503	627.8152	1253.6159	1253.6139	1.60	0	61	1	U	K.FASSLSESGEVK.V + [+14.0157 at S8]
		492	503	627.8153	1253.6161	1253.6139	1.70	0	82	1	U	K.FASSLSESGEVK.V + [+14.0157 at G9]
		492	503	631.7924	1261.5702	1261.5591	8.74	0	29	1	U	K.FASSLSESGEVK.V + Phospho (ST); [-58.0055 at E7]
		492	503	631.7982	1261.5819	1261.5591	18.0	0	37	1	U	K.FASSLSESGEVK.V + Phospho (ST); [-58.0055 at E10]
		492	503	631.7947	1261.5748	1261.5802	-4.30	0	69	1	U	K.FASSLSESGEVK.V + [+21.9819 at E7]
		492	503	631.7949	1261.5753	1261.5802	-3.92	0	55	1	U	K.FASSLSESGEVK.V + [+21.9819 at E7]
		492	503	631.7954	1261.5763	1261.5802	-3.14	0	49	1	U	K.FASSLSESGEVK.V + [+21.9819 at E10]
		492	503	631.7966	1261.5787	1261.5802	-1.21	0	29	1	U	K.FASSLSESGEVK.V + [+21.9819 at E10]
		492	503	631.7968	1261.5791	1261.5802	-0.92	0	37	1	U	K.FASSLSESGEVK.V + [+21.9819 at E10]
		492	503	631.8005	1261.5864	1261.5802	4.90	0	39	1	U	K.FASSLSESGEVK.V + [+21.9819 at E7]
		492	503	631.8008	1261.5871	1261.5802	5.47	0	36	1	U	K.FASSLSESGEVK.V + [+21.9819 at E10]
		492	503	422.1920	1263.5541	1263.5731	-15.1	0	27	1	U	K.FASSLSESGEVK.V + [+23.9748 at L5]
		492	503	633.8129	1265.6112	1265.6139	-2.17	0	61	1	U	K.FASSLSESGEVK.V + [+26.0157 at A2]
		492	503	634.8207	1267.6269	1267.5932	26.6	0	60	1	U	K.FASSLSESGEVK.V + [+27.9949 at S8]
		492	503	634.8196	1267.6247	1267.6296	-3.83	0	71	1	U	K.FASSLSESGEVK.V + [+28.0313 at E10]
		492	503	634.8229	1267.6313	1267.6296	1.37	0	73	1	U	K.FASSLSESGEVK.V + 2 [+14.0157 at E7,E10]
		492	503	641.8107	1281.6069	1281.6088	-1.51	0	55	1	U	K.FASSLSESGEVK.V + [+42.0106 at N-term]
		492	503	641.8113	1281.6080	1281.6088	-0.65	0	56	1	U	K.FASSLSESGEVK.V + [+42.0106 at N-term]
		493	503	547.2714	1092.5283	1092.4935	31.9	0	61	1	U	F.ASSLSESGEVK.V + [-0.0364 at C-term K]
		493	503	611.3017	1220.5888	1220.6374	-39.8	0	39	1	U	F.ASSLSESGEVK.V + [+128.1075 at N-term]
		493	503	611.3025	1220.5905	1220.6374	-38.4	0	39	1	U	F.ASSLSESGEVK.V + [+128.1075 at N-term]
		494	503	511.7524	1021.4903	1021.4564	33.2	0	64	1	U	A.SSLSESGEVK.V + [-0.0364 at C-term K]
		494	503	511.7525	1021.4904	1021.4564	33.3	0	70	1	U	A.SSLSESGEVK.V + [-0.0364 at C-term K]
		495	503	468.2366	934.4586	934.4243	36.6	0	37	1	U	S.SLSESGEVK.V + [-0.0364 at C-term K]
		508	514	383.2148	764.4151	764.4181	-3.97	1	32	1	U	K.VKDGVPH.L + [+14.0157 at G4]
		508	517	365.2162	1092.6267	1092.5928	31.1	1	50	1	U	K.VKDGVPHLTK.V + [-0.0364 at C-term K]
		508	517	365.2164	1092.6273	1092.5928	31.6	1	50	1	U	K.VKDGVPHLTK.V + [-0.0364 at C-term K]
		508	517	365.2164	1092.6274	1092.5928	31.7	1	49	1	U	K.VKDGVPHLTK.V + [-0.0364 at C-term K]
		508	517	554.3275	1106.6405	1106.6448	-3.92	1	48	1	U	K.VKDGVPHLTK.V + [+14.0157 at G4]
		508	517	554.3278	1106.6410	1106.6448	-3.47	1	47	1	U	K.VKDGVPHLTK.V + [+14.0157 at V5]
		508	517	554.3279	1106.6412	1106.6448	-3.25	1	45	1	U	K.VKDGVPHLTK.V + [+14.0157 at V5]
		508	517	369.8877	1106.6413	1106.6448	-3.19	1	51	1	U	K.VKDGVPHLTK.V + [+14.0157 at V5]
		508	517	369.8877	1106.6413	1106.6448	-3.19	1	45	1	U	K.VKDGVPHLTK.V + [+14.0157 at V5]
		508	517	554.3280	1106.6414	1106.6448	-3.03	1	50	1	U	K.VKDGVPHLTK.V + [+14.0157 at V5]
		508	517	369.8878	1106.6415	1106.6448	-2.95	1	43	1	U	K.VKDGVPHLTK.V + [+14.0157 at V5]
		508	517	369.8878	1106.6415	1106.6448	-2.95	1	51	1	U	K.VKDGVPHLTK.V + [+14.0157 at V5]
		508	517	554.3281	1106.6417	1106.6448	-2.80	1	40	1	U	K.VKDGVPHLTK.V + [+14.0157 at G4]
		508	517	554.3281	1106.6417	1106.6448	-2.80	1	49	1	U	K.VKDGVPHLTK.V + [+14.0157 at V5]
		508	517	554.3281	1106.6417	1106.6448	-2.80	1	51	1	U	K.VKDGVPHLTK.V + [+14.0157 at G4]
		508	517	554.3282	1106.6418	1106.6448	-2.69	1	53	1	U	K.VKDGVPHLTK.V + [+14.0157 at G4]
		508	517	554.3282	1106.6418	1106.6448	-2.69	1	47	1	U	K.VKDGVPHLTK.V + [+14.0157 at G4]
		508	517	369.8879	1106.6420	1106.6448	-2.54	1	46	1	U	K.VKDGVPHLTK.V + [+14.0157 at V5]
		508	517	369.8880	1106.6421	1106.6448	-2.46	1	46	1	U	K.VKDGVPHLTK.V + [+14.0157 at V5]
		508	517	369.8880	1106.6421	1106.6448	-2.46	1	46	1	U	K.VKDGVPHLTK.V + [+14.0157 at V5]
		508	517	369.8880	1106.6422	1106.6448	-2.38	1	46	1	U	K.VKDGVPHLTK.V + [+14.0157 at V5]
		508	517	369.8880	1106.6422	1106.6448	-2.38	1	46	1	U	K.VKDGVPHLTK.V + [+14.0157 at V5]
		508	517	369.8880	1106.6422	1106.6448	-2.38	1	43	1	U	K.VKDGVPHLTK.V + [+14.0157 at V5]
		508	517	369.8880	1106.6423	1106.6448	-2.30	1	42	1	U	K.VKDGVPHLTK.V + [+14.0157 at V5]
		508	517	554.3284	1106.6423	1106.6448	-2.26	1	53	1	U	K.VKDGVPHLTK.V + [+14.0157 at G4]
		508	517	369.8881	1106.6424	1106.6448	-2.22	1	43	1	U	K.VKDGVPHLTK.V + [+14.0157 at V5]
		508	517	369.8881	1106.6424	1106.6448	-2.14	1	44	1	U	K.VKDGVPHLTK.V + [+14.0157 at V5]
		508	517	554.3285	1106.6425	1106.6448	-2.04	1	53	1	U	K.VKDGVPHLTK.V + [+14.0157 at G4]
		508	517	369.8881	1106.6426	1106.6448	-1.97	1	43	1	U	K.VKDGVPHLTK.V + [+14.0157 at V5]
		508	517	554.3286	1106.6427	1106.6448	-1.93	1	51	1	U	K.VKDGVPHLTK.V + [+14.0157 at G4]
		508	517	554.3286	1106.6427	1106.6448	-1.93	1	47	1	U	K.VKDGVPHLTK.V + [+14.0157 at G4]
		508	517	554.3287	1106.6428	1106.6448	-1.82	1	45	1	U	K.VKDGVPHLTK.V + [+14.0157 at G4]
		508	517	369.8882	1106.6428	1106.6448	-1.81	1	46	1	U	K.VKDGVPHLTK.V + [+14.0157 at V5]
		508	517	554.3287	1106.6429	1106.6448	-1.70	1	51	1	U	K.VKDGVPHLTK.V + [+14.0157 at G4]
		508	517	369.8884	1106.6433	1106.6448	-1.38	1	42	1	U	K.VKDGVPHLTK.V + [+14.0157 at V5]
		508	517	554.3290	1106.6434	1106.6448	-1.26	1	55	1	U	K.VKDGVPHLTK.V + [+14.0157 at G4]
		508	517	554.3298	1106.6450	1106.6448	0.16	1	46	1	U	K.VKDGVPHLTK.V + [+14.0157 at G4]
		509	517	365.2164	1092.6273	1092.5928	31.6	1	59	1	U	V.KDGVPHLTK.V + Carbamidomethyl (K); [+42.0106 at N-term]
		510	517	433.7391	865.4637	865.4294	39.6	0	53	1	U	K.DGVPHLTK.V + [-0.0364 at C-term K]
		510	517	433.7394	865.4643	865.4658	-1.74	0	27	1	U	K.DGVPHLTK.V
		510	517	433.7395	865.4644	865.4658	-1.60	0	53	1	U	K.DGVPHLTK.V
		510	517	440.7466	879.4786	879.4814	-3.21	0	58	1	U	K.DGVPHLTK.V + [+14.0157 at V3]
		510	517	440.7470	879.4793	879.4814	-2.37	0	45	1	U	K.DGVPHLTK.V + [+14.0157 at V3]
		510	517	440.7470	879.4795	879.4814	-2.16	0	54	1	U	K.DGVPHLTK.V + [+14.0157 at V3]
		510	521	442.2253	1323.6540	1323.6936	-29.9	1	36	1	U	K.DGVPHLTKVGSF.E + [+68.0374 at K8]
		511	517	383.2332	764.4519	764.4545	-3.30	0	27	1	U	D.GVPHLTK.V + [+14.0156 at N-term]
		511	517	431.7415	861.4684	861.4804	-14.0	0	31	1	U	D.GVPHLTK.V + [+111.0416 at N-term]
		536	544	480.7257	959.4369	959.4746	-39.3	0	31	1	U	R.QVDQPGMIG.T + Oxidation (M); [+0.0364 at Q4]
		536	550	805.3946	1608.7747	1608.7583	10.2	0	49	1	U	R.QVDQPGMIGTVGSIL.G + Oxidation (M); Phospho (ST); [-0.9840 at C-term]
		536	550	805.3961	1608.7777	1608.7583	12.1	0	52	1	U	R.QVDQPGMIGTVGSIL.G + Oxidation (M); Phospho (ST); [-0.9840 at C-term]
		536	551	794.4037	1586.7929	1586.8338	-25.8	0	58	1	U	R.QVDQPGMIGTVGSILG.E + Oxidation (M); [+0.0364 at Q4]
		536	551	794.4047	1586.7949	1586.8338	-24.5	0	63	1	U	R.QVDQPGMIGTVGSILG.E + Oxidation (M); [+0.0364 at Q4]
		536	551	794.4050	1586.7954	1586.8338	-24.2	0	56	1	U	R.QVDQPGMIGTVGSILG.E + Oxidation (M); [+0.0364 at Q4]
		536	551	794.4050	1586.7955	1586.8338	-24.2	0	66	1	U	R.QVDQPGMIGTVGSILG.E + Oxidation (M); [+0.0364 at Q4]
		536	558	782.0521	2343.1344	2343.1377	-1.41	0	46	1	U	R.QVDQPGMIGTVGSILGESNVNVN.F + [+15.9949 at P5]
		536	558	782.0525	2343.1356	2343.1741	-16.4	0	53	1	U	R.QVDQPGMIGTVGSILGESNVNVN.F + Oxidation (M); [+0.0364 at Q4]
		536	564	1013.1595	3036.4566	3036.5009	-14.6	0	96	1	U	R.QVDQPGMIGTVGSILGESNVNVNFMSVGR.I + 2 Oxidation (M); [+0.0364 at Q4]
		536	564	1013.1597	3036.4572	3036.5009	-14.4	0	84	1	U	R.QVDQPGMIGTVGSILGESNVNVNFMSVGR.I + 2 Oxidation (M); [+0.0364 at Q4]
		536	564	1013.1601	3036.4585	3036.5009	-14.0	0	95	1	U	R.QVDQPGMIGTVGSILGESNVNVNFMSVGR.I + 2 Oxidation (M); [+0.0364 at Q4]
		536	564	1013.1605	3036.4596	3036.5009	-13.6	0	109	1	U	R.QVDQPGMIGTVGSILGESNVNVNFMSVGR.I + 2 Oxidation (M); [+0.0364 at Q4]
		536	564	1013.1608	3036.4605	3036.5009	-13.3	0	117	1	U	R.QVDQPGMIGTVGSILGESNVNVNFMSVGR.I + 2 Oxidation (M); [+0.0364 at Q4]
		536	564	1013.1609	3036.4608	3036.5009	-13.2	0	90	1	U	R.QVDQPGMIGTVGSILGESNVNVNFMSVGR.I + 2 Oxidation (M); [+0.0364 at Q4]
		536	564	1013.1624	3036.4654	3036.5009	-11.7	0	106	1	U	R.QVDQPGMIGTVGSILGESNVNVNFMSVGR.I + 2 Oxidation (M); [+0.0364 at Q4]
		536	564	1017.8185	3050.4336	3050.4624	-9.44	0	38	1	U	R.QVDQPGMIGTVGSILGESNVNVNFMSVGR.I + Oxidation (M); [+29.9928 at T10]
		536	564	1017.8258	3050.4556	3050.4802	-8.05	0	86	1	U	R.QVDQPGMIGTVGSILGESNVNVNFMSVGR.I + 2 Oxidation (M); [+14.0157 at E17]
		536	564	1018.1641	3051.4705	3051.4390	10.3	0	66	1	U	R.QVDQPGMIGTVGSILGESNVNVNFMSVGR.I + 2 Oxidation (M); [+14.9745 at L15]
		537	564	1519.2391	3036.4637	3036.5106	-15.4	0	43	1	U	Q.VDQPGMIGTVGSILGESNVNVNFMSVGR.I + Oxidation (M); [+144.0996 at N-term]
		554	564	662.3244	1322.6342	1322.6224	8.99	0	58	1	U	S.NVNVNFMSVGR.I + [+87.0143 at N-term N]
		554	564	662.3263	1322.6380	1322.6224	11.8	0	62	1	U	S.NVNVNFMSVGR.I + [+87.0143 at N-term N]
		555	564	561.7883	1121.5620	1121.5652	-2.84	0	64	1	U	N.VNVNFMSVGR.I
		555	564	569.7861	1137.5576	1137.5601	-2.20	0	66	1	U	N.VNVNFMSVGR.I + Oxidation (M)
		555	564	569.7864	1137.5583	1137.5601	-1.55	0	63	1	U	N.VNVNFMSVGR.I + Oxidation (M)
		559	564	348.6777	695.3408	695.3425	-2.44	0	28	1	U	N.FMSVGR.I
		559	564	356.6751	711.3356	711.3374	-2.52	0	34	1	U	N.FMSVGR.I + Oxidation (M)
		559	564	356.6752	711.3358	711.3374	-2.18	0	34	1	U	N.FMSVGR.I + Oxidation (M)
		569	579	588.7989	1175.5833	1175.5492	29.0	1	49	1	U	R.KQAIMAIGVDD.I + Oxidation (M); [-0.0364 at N-term K]
		569	579	589.2915	1176.5684	1176.5696	-1.00	1	48	1	U	R.KQAIMAIGVDD.I + Oxidation (M); [+0.9840 at Q2]
		569	579	589.2916	1176.5686	1176.5696	-0.90	1	49	1	U	R.KQAIMAIGVDD.I + Oxidation (M); [+0.9840 at Q2]
		569	579	595.8067	1189.5988	1189.6013	-2.04	1	67	1	U	R.KQAIMAIGVDD.I + Oxidation (M); [+14.0157 at C-term D]
		569	579	595.8068	1189.5991	1189.6013	-1.84	1	62	1	U	R.KQAIMAIGVDD.I + Oxidation (M); [+14.0157 at C-term D]
		569	579	595.8069	1189.5992	1189.6013	-1.74	1	59	1	U	R.KQAIMAIGVDD.I + Oxidation (M); [+14.0157 at C-term D]
		569	579	595.8070	1189.5993	1189.6013	-1.62	1	75	1	U	R.KQAIMAIGVDD.I + Oxidation (M); [+14.0157 at C-term D]
		569	579	595.8081	1189.6017	1189.6013	0.33	1	54	1	U	R.KQAIMAIGVDD.I + Oxidation (M); [+14.0157 at C-term D]
		569	579	596.7966	1191.5787	1191.5805	-1.52	1	35	1	U	R.KQAIMAIGVDD.I + [+31.9898 at M5]
		569	582	533.9503	1598.8290	1598.8589	-18.8	1	30	1	U	R.KQAIMAIGVDDIPS.K + Oxidation (M); [+126.1045 at C-term S]
		569	582	533.9504	1598.8293	1598.8589	-18.5	1	46	1	U	R.KQAIMAIGVDDIPS.K + Oxidation (M); [+126.1045 at C-term S]
		569	582	800.4222	1598.8299	1598.8589	-18.1	1	47	1	U	R.KQAIMAIGVDDIPS.K + Oxidation (M); [+126.1045 at C-term S]
		569	582	533.9507	1598.8302	1598.8589	-18.0	1	35	1	U	R.KQAIMAIGVDDIPS.K + Oxidation (M); [+126.1045 at C-term S]
		569	582	800.4229	1598.8311	1598.8589	-17.4	1	48	1	U	R.KQAIMAIGVDDIPS.K + Oxidation (M); [+126.1045 at C-term S]
		569	582	800.4232	1598.8319	1598.8589	-16.9	1	49	1	U	R.KQAIMAIGVDDIPS.K + Oxidation (M); [+126.1045 at C-term S]
		569	582	533.9520	1598.8343	1598.8589	-15.4	1	38	1	U	R.KQAIMAIGVDDIPS.K + Oxidation (M); [+126.1045 at C-term S]
		569	582	800.4247	1598.8349	1598.8589	-15.0	1	45	1	U	R.KQAIMAIGVDDIPS.K + Oxidation (M); [+126.1045 at C-term S]
		569	583	785.4175	1568.8205	1568.8596	-24.9	1	69	1	U	R.KQAIMAIGVDDIPSK.E + [-15.9949 at S14]
		569	583	785.4177	1568.8208	1568.8596	-24.8	1	79	1	U	R.KQAIMAIGVDDIPSK.E + [-15.9949 at S14]
		569	583	785.4177	1568.8209	1568.8596	-24.7	1	81	1	U	R.KQAIMAIGVDDIPSK.E + [-15.9949 at S14]
		569	583	785.4179	1568.8211	1568.8596	-24.5	1	97	1	U	R.KQAIMAIGVDDIPSK.E + [-15.9949 at S14]
		569	583	529.2781	1584.8126	1584.8545	-26.5	1	40	1	U	R.KQAIMAIGVDDIPSK.E + Oxidation (M); [-15.9949 at S14]
		569	583	529.2783	1584.8131	1584.8545	-26.1	1	38	1	U	R.KQAIMAIGVDDIPSK.E + Oxidation (M); [-15.9949 at S14]
		569	583	529.2784	1584.8133	1584.8545	-26.0	1	37	1	U	R.KQAIMAIGVDDIPSK.E + Oxidation (M); [-15.9949 at S14]
		569	583	529.2786	1584.8141	1584.8545	-25.5	1	33	1	U	R.KQAIMAIGVDDIPSK.E + Oxidation (M); [-15.9949 at S14]
		569	583	793.4143	1584.8141	1584.8545	-25.5	1	43	1	U	R.KQAIMAIGVDDIPSK.E + Oxidation (M); [-15.9949 at S14]
		569	583	793.4146	1584.8147	1584.8545	-25.1	1	51	1	U	R.KQAIMAIGVDDIPSK.E + Oxidation (M); [-15.9949 at S14]
		569	583	793.4148	1584.8150	1584.8545	-24.9	1	39	1	U	R.KQAIMAIGVDDIPSK.E + Oxidation (M); [-15.9949 at S14]
		569	583	529.2790	1584.8151	1584.8545	-24.8	1	43	1	U	R.KQAIMAIGVDDIPSK.E + Oxidation (M); [-15.9949 at S14]
		569	583	529.2790	1584.8151	1584.8545	-24.8	1	37	1	U	R.KQAIMAIGVDDIPSK.E + Oxidation (M); [-15.9949 at S14]
		569	583	793.4149	1584.8152	1584.8545	-24.8	1	55	1	U	R.KQAIMAIGVDDIPSK.E + Oxidation (M); [-15.9949 at S14]
		569	583	793.4150	1584.8154	1584.8545	-24.7	1	66	1	U	R.KQAIMAIGVDDIPSK.E + Oxidation (M); [-15.9949 at S14]
		569	583	529.2791	1584.8155	1584.8545	-24.6	1	44	1	U	R.KQAIMAIGVDDIPSK.E + Oxidation (M); [-15.9949 at S14]
		569	583	529.2791	1584.8155	1584.8545	-24.6	1	45	1	U	R.KQAIMAIGVDDIPSK.E + Oxidation (M); [-15.9949 at S14]
		569	583	793.4150	1584.8155	1584.8545	-24.6	1	56	1	U	R.KQAIMAIGVDDIPSK.E + Oxidation (M); [-15.9949 at S14]
		569	583	793.4153	1584.8160	1584.8545	-24.3	1	59	1	U	R.KQAIMAIGVDDIPSK.E + Oxidation (M); [-15.9949 at S14]
		569	583	529.2793	1584.8161	1584.8545	-24.3	1	36	1	U	R.KQAIMAIGVDDIPSK.E + Oxidation (M); [-15.9949 at S14]
		569	583	529.2796	1584.8170	1584.8545	-23.7	1	45	1	U	R.KQAIMAIGVDDIPSK.E + Oxidation (M); [-15.9949 at S14]
		569	583	793.4159	1584.8173	1584.8545	-23.5	1	55	1	U	R.KQAIMAIGVDDIPSK.E + Oxidation (M); [-15.9949 at S14]
		569	583	808.9171	1615.8195	1615.8603	-25.2	1	98	1	U	R.KQAIMAIGVDDIPSK.E + Oxidation (M); [+15.0109 at I12]
		569	583	539.6139	1615.8198	1615.8603	-25.1	1	64	1	U	R.KQAIMAIGVDDIPSK.E + Oxidation (M); [+15.0109 at I12]
		569	583	808.9177	1615.8208	1615.8603	-24.5	1	82	1	U	R.KQAIMAIGVDDIPSK.E + Oxidation (M); [+15.0109 at I12]
		569	583	539.6142	1615.8208	1615.8603	-24.5	1	68	1	U	R.KQAIMAIGVDDIPSK.E + Oxidation (M); [+15.0109 at I12]
		569	583	808.9179	1615.8213	1615.8603	-24.2	1	114	1	U	R.KQAIMAIGVDDIPSK.E + Oxidation (M); [+15.0109 at I12]
		569	583	539.6144	1615.8213	1615.8603	-24.1	1	81	1	U	R.KQAIMAIGVDDIPSK.E + Oxidation (M); [+15.0109 at I12]
		569	583	539.6145	1615.8217	1615.8603	-23.9	1	81	1	U	R.KQAIMAIGVDDIPSK.E + Oxidation (M); [+15.0109 at I12]
		569	583	808.9181	1615.8217	1615.8603	-23.9	1	109	1	U	R.KQAIMAIGVDDIPSK.E + Oxidation (M); [+15.0109 at I12]
		570	579	535.7421	1069.4697	1069.4726	-2.71	0	33	1	U	K.QAIMAIGVDD.I + Oxidation (M); [+21.9819 at D9]
		570	579	535.7423	1069.4701	1069.4726	-2.38	0	44	1	U	K.QAIMAIGVDD.I + Oxidation (M); [+21.9819 at D9]
		570	582	728.3747	1454.7348	1454.7691	-23.5	0	60	1	U	K.QAIMAIGVDDIPS.K + [+126.1045 at C-term S]
		570	582	736.3751	1470.7357	1470.7640	-19.2	0	49	1	U	K.QAIMAIGVDDIPS.K + Oxidation (M); [+126.1045 at C-term S]
		570	582	736.3752	1470.7358	1470.7640	-19.2	0	49	1	U	K.QAIMAIGVDDIPS.K + Oxidation (M); [+126.1045 at C-term S]
		570	582	736.3754	1470.7362	1470.7640	-18.9	0	49	1	U	K.QAIMAIGVDDIPS.K + Oxidation (M); [+126.1045 at C-term S]
		570	582	736.3756	1470.7367	1470.7640	-18.6	0	49	1	U	K.QAIMAIGVDDIPS.K + Oxidation (M); [+126.1045 at C-term S]
		570	582	736.3757	1470.7368	1470.7640	-18.5	0	48	1	U	K.QAIMAIGVDDIPS.K + Oxidation (M); [+126.1045 at C-term S]
		570	583	721.3629	1440.7113	1440.7646	-37.0	0	62	1	U	K.QAIMAIGVDDIPSK.E + [-15.9949 at S13]
		570	583	721.3679	1440.7213	1440.7646	-30.1	0	64	1	U	K.QAIMAIGVDDIPSK.E + [-15.9949 at S13]
		570	583	721.3684	1440.7223	1440.7646	-29.4	0	83	1	U	K.QAIMAIGVDDIPSK.E + [-15.9949 at S13]
		570	583	721.3701	1440.7256	1440.7646	-27.1	0	48	1	U	K.QAIMAIGVDDIPSK.E + [-15.9949 at S13]
		570	583	486.5808	1456.7204	1456.7596	-26.9	0	50	1	U	K.QAIMAIGVDDIPSK.E + Oxidation (M); [-15.9949 at S13]
		570	583	729.3676	1456.7207	1456.7596	-26.7	0	67	1	U	K.QAIMAIGVDDIPSK.E + Oxidation (M); [-15.9949 at S13]
		570	583	729.3677	1456.7209	1456.7596	-26.5	0	66	1	U	K.QAIMAIGVDDIPSK.E + Oxidation (M); [-15.9949 at S13]
		570	583	729.3678	1456.7210	1456.7596	-26.4	0	66	1	U	K.QAIMAIGVDDIPSK.E + Oxidation (M); [-15.9949 at S13]
		570	583	729.3680	1456.7214	1456.7596	-26.2	0	43	1	U	K.QAIMAIGVDDIPSK.E + Oxidation (M); [-15.9949 at S13]
		570	583	729.3680	1456.7214	1456.7596	-26.2	0	54	1	U	K.QAIMAIGVDDIPSK.E + Oxidation (M); [-15.9949 at S13]
		570	583	729.3680	1456.7215	1456.7596	-26.1	0	64	1	U	K.QAIMAIGVDDIPSK.E + Oxidation (M); [-15.9949 at S13]
		570	583	729.3682	1456.7219	1456.7596	-25.9	0	40	1	U	K.QAIMAIGVDDIPSK.E + Oxidation (M); [-15.9949 at S13]
		570	583	729.8605	1457.7065	1457.7436	-25.4	0	32	1	U	K.QAIMAIGVDDIPSK.E + Oxidation (M); [-15.0109 at C-term K]
		570	583	736.8721	1471.7296	1471.7704	-27.8	0	57	1	U	K.QAIMAIGVDDIPSK.E + [+15.0109 at I11]
		570	583	744.8700	1487.7254	1487.7654	-26.8	0	36	1	U	K.QAIMAIGVDDIPSK.E + Oxidation (M); [+15.0109 at I11]
		570	583	744.8707	1487.7269	1487.7654	-25.8	0	89	1	U	K.QAIMAIGVDDIPSK.E + Oxidation (M); [+15.0109 at I11]
		570	583	744.8709	1487.7271	1487.7654	-25.7	0	83	1	U	K.QAIMAIGVDDIPSK.E + Oxidation (M); [+15.0109 at I11]
		570	583	744.8709	1487.7271	1487.7654	-25.7	0	84	1	U	K.QAIMAIGVDDIPSK.E + Oxidation (M); [+15.0109 at I11]
		570	583	752.3695	1502.7245	1502.7287	-2.78	0	49	1	U	K.QAIMAIGVDDIPSK.E + Oxidation (M); [+29.9742 at V8]
		570	587	643.6702	1927.9887	1928.0652	-39.7	1	52	1	U	K.QAIMAIGVDDIPSKETLK.K + Oxidation (M); [-15.9585 at D9]
		570	587	643.6707	1927.9901	1928.0652	-39.0	1	64	1	U	K.QAIMAIGVDDIPSKETLK.K + Oxidation (M); [-15.9585 at D9]
		574	583	499.7602	997.5058	997.5444	-38.7	0	48	1	U	M.AIGVDDIPSK.E + [-15.9949 at S9]
		574	583	499.7602	997.5059	997.5444	-38.6	0	36	1	U	M.AIGVDDIPSK.E + [-15.9949 at S9]
		574	583	499.7609	997.5072	997.5444	-37.3	0	36	1	U	M.AIGVDDIPSK.E + [-15.9949 at S9]
		574	583	515.2630	1028.5114	1028.5502	-37.7	0	50	1	U	M.AIGVDDIPSK.E + [+15.0109 at I7]
		574	583	515.2631	1028.5116	1028.5502	-37.6	0	51	1	U	M.AIGVDDIPSK.E + [+15.0109 at I7]
		574	583	515.2643	1028.5140	1028.5502	-35.2	0	47	1	U	M.AIGVDDIPSK.E + [+15.0109 at I7]
		584	588	309.6947	617.3749	617.3748	0.17	1	40	1	U	K.ETLKK.I
		584	588	309.6947	617.3749	617.3748	0.17	1	44	1	U	K.ETLKK.I
		584	588	309.6947	617.3749	617.3748	0.17	1	44	1	U	K.ETLKK.I
		584	588	309.6948	617.3750	617.3748	0.27	1	44	1	U	K.ETLKK.I
		584	588	309.6948	617.3750	617.3748	0.27	1	44	1	U	K.ETLKK.I
		584	588	309.6948	617.3750	617.3748	0.37	1	44	1	U	K.ETLKK.I
		584	588	309.6948	617.3750	617.3748	0.37	1	37	1	U	K.ETLKK.I
		584	588	309.6948	617.3751	617.3748	0.46	1	44	1	U	K.ETLKK.I
		584	588	309.6948	617.3751	617.3748	0.56	1	44	1	U	K.ETLKK.I
		584	588	309.6950	617.3753	617.3748	0.88	1	44	1	U	K.ETLKK.I
		584	588	309.6950	617.3755	617.3748	1.08	1	44	1	U	K.ETLKK.I
		584	588	309.6951	617.3756	617.3748	1.37	1	40	1	U	K.ETLKK.I
		584	588	351.6919	701.3693	701.3662	4.39	1	37	1	U	K.ETLKK.I + Phospho (ST); [+4.0251 at K4]
		589	602	795.9414	1589.8683	1589.8341	21.5	0	32	1	U	K.IGEIPAVEEFVFLK.L + [-0.0364 at C-term K]
		589	602	795.9429	1589.8713	1589.8341	23.4	0	34	1	U	K.IGEIPAVEEFVFLK.L + [-0.0364 at C-term K]
		589	602	795.9431	1589.8717	1589.8341	23.6	0	40	1	U	K.IGEIPAVEEFVFLK.L + [-0.0364 at C-term K]
		589	602	802.9489	1603.8833	1603.8861	-1.79	0	36	1	U	K.IGEIPAVEEFVFLK.L + [+14.0157 at V7]
		589	602	535.6354	1603.8843	1603.8861	-1.14	0	57	1	U	K.IGEIPAVEEFVFLK.L + [+14.0157 at V7]
		589	602	535.6355	1603.8847	1603.8861	-0.91	0	38	1	U	K.IGEIPAVEEFVFLK.L + [+14.0157 at V7]
		589	602	802.9499	1603.8852	1603.8861	-0.57	0	32	1	U	K.IGEIPAVEEFVFLK.L + [+14.0157 at V7]
		589	602	540.3072	1617.8997	1617.9018	-1.27	0	38	1	U	K.IGEIPAVEEFVFLK.L + 2 [+14.0157 at E3,E8]
		589	602	544.9794	1631.9163	1631.9174	-0.72	0	38	1	U	K.IGEIPAVEEFVFLK.L + 3 [+14.0157 at E3,E8,E9]
14	gi|15383744	115	124	586.8109	1171.6073	1171.5761	26.6	0	55	1	U	R.YLLYGDISTK.A + [-0.0364 at C-term K]
		115	124	586.8115	1171.6084	1171.5761	27.5	0	55	1	U	R.YLLYGDISTK.A + [-0.0364 at C-term K]
		115	124	586.8121	1171.6097	1171.5761	28.7	0	50	1	U	R.YLLYGDISTK.A + [-0.0364 at C-term K]
		115	124	586.8122	1171.6098	1171.5761	28.8	0	43	1	U	R.YLLYGDISTK.A + [-0.0364 at C-term K]
		115	124	586.8122	1171.6098	1171.5761	28.8	0	56	1	U	R.YLLYGDISTK.A + [-0.0364 at C-term K]
		115	124	586.8124	1171.6103	1171.5761	29.2	0	45	1	U	R.YLLYGDISTK.A + [-0.0364 at C-term K]
		115	124	586.8127	1171.6109	1171.5761	29.7	0	60	1	U	R.YLLYGDISTK.A + [-0.0364 at C-term K]
		115	124	586.8129	1171.6113	1171.5761	30.1	0	60	1	U	R.YLLYGDISTK.A + [-0.0364 at C-term K]
		115	124	586.8131	1171.6117	1171.5761	30.4	0	60	1	U	R.YLLYGDISTK.A + [-0.0364 at C-term K]
		115	124	586.8134	1171.6121	1171.5761	30.8	0	44	1	U	R.YLLYGDISTK.A + [-0.0364 at C-term K]
		115	124	586.8134	1171.6123	1171.5761	30.9	0	60	1	U	R.YLLYGDISTK.A + [-0.0364 at C-term K]
		125	133	323.1835	966.5288	966.4957	34.2	0	30	1	U	K.AAHMLALPK.V + Oxidation (M); [-0.0364 at C-term K]
		125	133	323.1836	966.5289	966.4957	34.3	0	28	1	U	K.AAHMLALPK.V + Oxidation (M); [-0.0364 at C-term K]
		125	133	323.1836	966.5290	966.4957	34.5	0	32	1	U	K.AAHMLALPK.V + Oxidation (M); [-0.0364 at C-term K]
		125	133	323.1841	966.5305	966.4957	36.0	0	27	1	U	K.AAHMLALPK.V + Oxidation (M); [-0.0364 at C-term K]
		125	133	323.1841	966.5305	966.4957	36.0	0	28	1	U	K.AAHMLALPK.V + Oxidation (M); [-0.0364 at C-term K]
		125	133	323.1841	966.5306	966.4957	36.1	0	28	1	U	K.AAHMLALPK.V + Oxidation (M); [-0.0364 at C-term K]
		125	133	484.2726	966.5307	966.4957	36.2	0	37	1	U	K.AAHMLALPK.V + Oxidation (M); [-0.0364 at C-term K]
		125	133	484.2726	966.5307	966.4957	36.2	0	43	1	U	K.AAHMLALPK.V + Oxidation (M); [-0.0364 at C-term K]
		125	133	323.1843	966.5310	966.4957	36.5	0	31	1	U	K.AAHMLALPK.V + Oxidation (M); [-0.0364 at C-term K]
		125	133	323.1843	966.5312	966.4957	36.7	0	25	1	U	K.AAHMLALPK.V + Oxidation (M); [-0.0364 at C-term K]
		125	133	484.2731	966.5316	966.4957	37.2	0	38	1	U	K.AAHMLALPK.V + Oxidation (M); [-0.0364 at C-term K]
		149	161	728.3605	1454.7064	1454.7518	-31.2	0	67	1	U	K.SYQQAAGEVFVTR.K + [+0.0364 at Q4]
		149	161	728.3637	1454.7129	1454.7518	-26.8	0	66	1	U	K.SYQQAAGEVFVTR.K + [+0.0364 at Q4]
		149	161	728.3638	1454.7131	1454.7518	-26.6	0	69	1	U	K.SYQQAAGEVFVTR.K + [+0.0364 at Q4]
		149	161	728.3638	1454.7131	1454.7518	-26.6	0	66	1	U	K.SYQQAAGEVFVTR.K + [+0.0364 at Q4]
		149	161	728.3639	1454.7132	1454.7518	-26.5	0	63	1	U	K.SYQQAAGEVFVTR.K + [+0.0364 at Q4]
		149	161	728.3641	1454.7137	1454.7518	-26.2	0	71	1	U	K.SYQQAAGEVFVTR.K + [+0.0364 at Q4]
		149	161	728.3641	1454.7137	1454.7518	-26.2	0	70	1	U	K.SYQQAAGEVFVTR.K + [+0.0364 at Q4]
		149	161	728.3644	1454.7142	1454.7518	-25.8	0	68	1	U	K.SYQQAAGEVFVTR.K + [+0.0364 at Q4]
		149	161	728.3667	1454.7188	1454.7518	-22.6	0	51	1	U	K.SYQQAAGEVFVTR.K + [+0.0364 at Q4]
		149	161	735.3722	1468.7298	1468.7310	-0.83	0	60	1	U	K.SYQQAAGEVFVTR.K + [+14.0157 at E8]
		149	161	735.3731	1468.7317	1468.7310	0.42	0	53	1	U	K.SYQQAAGEVFVTR.K + [+14.0157 at E8]
		149	161	735.3735	1468.7325	1468.7310	1.01	0	61	1	U	K.SYQQAAGEVFVTR.K + [+14.0157 at E8]
		163	173	692.8146	1383.6147	1383.6605	-33.1	0	43	1	U	K.FLENFCGDQVR.F + [+0.0364 at Q9]
		163	173	692.8176	1383.6206	1383.6605	-28.9	0	49	1	U	K.FLENFCGDQVR.F + [+0.0364 at Q9]
		163	173	692.8180	1383.6215	1383.6605	-28.2	0	51	1	U	K.FLENFCGDQVR.F + [+0.0364 at Q9]
		163	173	692.8181	1383.6217	1383.6605	-28.1	0	51	1	U	K.FLENFCGDQVR.F + [+0.0364 at Q9]
		163	173	692.8186	1383.6226	1383.6605	-27.4	0	52	1	U	K.FLENFCGDQVR.F + [+0.0364 at Q9]
		235	244	636.2925	1270.5705	1270.5720	-1.13	0	56	1	U	K.VSIVMEQMMR.L + 2 Oxidation (M); [+15.9949 at C-term R]
		235	244	636.2926	1270.5706	1270.5720	-1.03	0	56	1	U	K.VSIVMEQMMR.L + 2 Oxidation (M); [+15.9949 at C-term R]
		235	244	636.2926	1270.5706	1270.5720	-1.03	0	56	1	U	K.VSIVMEQMMR.L + 2 Oxidation (M); [+15.9949 at C-term R]
		235	244	643.3002	1284.5859	1284.5876	-1.33	0	30	1	U	K.VSIVMEQMMR.L + 3 Oxidation (M); [+14.0157 at E6]
		235	244	643.3007	1284.5868	1284.5876	-0.66	0	27	1	U	K.VSIVMEQMMR.L + 3 Oxidation (M); [+14.0157 at E6]
		235	244	644.2898	1286.5650	1286.5266	29.9	0	31	1	U	K.VSIVMEQMMR.L + Oxidation (M); [+47.9444 at M9]
		235	244	644.2897	1286.5648	1286.5669	-1.61	0	51	1	U	K.VSIVMEQMMR.L + 2 Oxidation (M); [+31.9898 at C-term R]
		235	244	644.2899	1286.5653	1286.5669	-1.22	0	51	1	U	K.VSIVMEQMMR.L + 2 Oxidation (M); [+31.9898 at C-term R]
		235	244	644.2900	1286.5655	1286.5669	-1.04	0	48	1	U	K.VSIVMEQMMR.L + 2 Oxidation (M); [+31.9898 at C-term R]
		235	244	644.2900	1286.5655	1286.5669	-1.04	0	51	1	U	K.VSIVMEQMMR.L + 2 Oxidation (M); [+31.9898 at C-term R]
		247	264	769.6956	2306.0649	2306.1140	-21.3	0	41	1	U	L.HYCGLPAEDVDFINSDGK.T + [+327.2410 at C3]
		247	264	769.7015	2306.0826	2306.1140	-13.6	0	40	1	U	L.HYCGLPAEDVDFINSDGK.T + [+327.2410 at C3]
		269	276	463.2755	924.5364	924.5392	-3.05	0	30	1	U	K.ILLEANPR.M
		269	276	463.2757	924.5368	924.5392	-2.64	0	34	1	U	K.ILLEANPR.M
		269	276	463.2757	924.5369	924.5392	-2.51	0	39	1	U	K.ILLEANPR.M
		269	276	463.2758	924.5370	924.5392	-2.38	0	39	1	U	K.ILLEANPR.M
		269	276	470.2838	938.5531	938.5549	-1.87	0	43	1	U	K.ILLEANPR.M + [+14.0157 at E4]
		269	276	470.2839	938.5533	938.5549	-1.72	0	36	1	U	K.ILLEANPR.M + [+14.0157 at E4]
		269	276	470.2841	938.5536	938.5549	-1.40	0	41	1	U	K.ILLEANPR.M + [+14.0157 at E4]
		269	276	470.2841	938.5537	938.5549	-1.28	0	43	1	U	K.ILLEANPR.M + [+14.0157 at E4]
		269	276	470.2841	938.5537	938.5549	-1.28	0	49	1	U	K.ILLEANPR.M + [+14.0157 at E4]
		269	276	470.2841	938.5537	938.5549	-1.28	0	52	1	U	K.ILLEANPR.M + [+14.0157 at E4]
		269	276	470.2843	938.5540	938.5549	-0.96	0	38	1	U	K.ILLEANPR.M + [+14.0157 at E4]
		269	276	470.2843	938.5540	938.5549	-0.96	0	37	1	U	K.ILLEANPR.M + [+14.0157 at E4]
		277	285	508.2463	1014.4781	1014.4804	-2.34	0	34	1	U	R.MTLFTGSSR.V + Oxidation (M)
		277	285	508.2469	1014.4793	1014.4804	-1.13	0	44	1	U	R.MTLFTGSSR.V + Oxidation (M)
		277	285	508.2470	1014.4793	1014.4804	-1.07	0	44	1	U	R.MTLFTGSSR.V + Oxidation (M)
		277	285	508.2470	1014.4795	1014.4804	-0.96	0	44	1	U	R.MTLFTGSSR.V + Oxidation (M)
		277	285	508.2470	1014.4795	1014.4804	-0.96	0	45	1	U	R.MTLFTGSSR.V + Oxidation (M)
		277	285	508.2471	1014.4796	1014.4804	-0.84	0	45	1	U	R.MTLFTGSSR.V + Oxidation (M)
		277	285	508.2472	1014.4798	1014.4804	-0.66	0	44	1	U	R.MTLFTGSSR.V + Oxidation (M)
		278	285	516.7435	1031.4724	1031.5053	-31.9	0	30	1	U	M.TLFTGSSR.V + [+164.0602 at N-term T]
		290	295	336.7175	671.4204	671.4218	-1.94	0	35	1	U	K.LALDLK.G
		290	295	336.7176	671.4206	671.4218	-1.76	0	54	1	U	K.LALDLK.G
		290	295	336.7176	671.4207	671.4218	-1.59	0	33	1	U	K.LALDLK.G
		290	295	336.7176	671.4207	671.4218	-1.59	0	35	1	U	K.LALDLK.G
		290	295	336.7177	671.4209	671.4218	-1.32	0	35	1	U	K.LALDLK.G
		290	295	336.7177	671.4209	671.4218	-1.23	0	38	1	U	K.LALDLK.G
		290	295	336.7178	671.4210	671.4218	-1.14	0	35	1	U	K.LALDLK.G
		290	295	336.7178	671.4210	671.4218	-1.05	0	35	1	U	K.LALDLK.G
		300	308	540.7528	1079.4911	1079.4560	32.5	0	57	1	U	R.LEDAGFDWK.V + [-0.0364 at C-term K]
		300	308	540.7530	1079.4914	1079.4560	32.8	0	56	1	U	R.LEDAGFDWK.V + [-0.0364 at C-term K]
		300	308	547.7600	1093.5055	1093.5080	-2.34	0	45	1	U	R.LEDAGFDWK.V + [+14.0157 at E2]
		300	308	547.7603	1093.5061	1093.5080	-1.79	0	45	1	U	R.LEDAGFDWK.V + [+14.0157 at E2]
		300	308	547.7607	1093.5069	1093.5080	-1.00	0	45	1	U	R.LEDAGFDWK.V + [+14.0157 at E2]
		300	308	548.7503	1095.4861	1095.4873	-1.11	0	60	1	U	R.LEDAGFDWK.V + [+15.9949 at W8]
		300	309	548.7518	1095.4891	1095.4907	-1.43	1	33	1	U	R.LEDAGFDWKV.L + [-83.0701 at W8]
		351	356	329.7098	657.4050	657.4061	-1.70	0	32	1	U	K.TPLVSK.L + [+14.0157 at V4]
		351	356	329.7098	657.4051	657.4061	-1.61	0	36	1	U	K.TPLVSK.L + [+14.0157 at V4]
		351	356	329.7098	657.4051	657.4061	-1.61	0	36	1	U	K.TPLVSK.L + [+14.0157 at V4]
		351	356	329.7099	657.4052	657.4061	-1.43	0	32	1	U	K.TPLVSK.L + [+14.0157 at V4]
		351	356	329.7099	657.4053	657.4061	-1.25	0	38	1	U	K.TPLVSK.L + [+14.0157 at V4]
		434	440	427.2364	852.4582	852.4593	-1.23	0	42	1	U	K.TYELVTK.E
		434	440	427.2366	852.4587	852.4593	-0.66	0	38	1	U	K.TYELVTK.E
		434	440	427.2367	852.4588	852.4593	-0.59	0	42	1	U	K.TYELVTK.E
		434	440	427.2367	852.4589	852.4593	-0.45	0	42	1	U	K.TYELVTK.E
		434	440	434.2439	866.4733	866.4749	-1.87	0	38	1	U	K.TYELVTK.E + [+14.0157 at E3]
		434	440	434.2440	866.4735	866.4749	-1.66	0	40	1	U	K.TYELVTK.E + [+14.0157 at E3]
		434	440	434.2442	866.4738	866.4749	-1.25	0	40	1	U	K.TYELVTK.E + [+14.0157 at E3]
		441	453	785.9108	1569.8071	1569.7715	22.7	0	49	1	U	K.EIFGPFQIVTEYK.K + [-0.0364 at C-term K]
		441	453	792.9201	1583.8256	1583.8235	1.33	0	52	1	U	K.EIFGPFQIVTEYK.K + [+14.0157 at E11]
		455	466	691.3861	1380.7577	1380.7977	-29.0	0	66	1	U	K.DQLPLVLDALER.M + [+0.0364 at Q2]
		455	466	691.3872	1380.7599	1380.7977	-27.4	0	66	1	U	K.DQLPLVLDALER.M + [+0.0364 at Q2]
		455	466	691.3889	1380.7633	1380.7977	-24.9	0	57	1	U	K.DQLPLVLDALER.M + [+0.0364 at Q2]
		455	466	698.3952	1394.7758	1394.7769	-0.77	0	57	1	U	K.DQLPLVLDALER.M + [+14.0157 at C-term R]
		455	466	702.3782	1402.7418	1402.7432	-1.01	0	30	1	U	K.DQLPLVLDALER.M + [+21.9819 at D8]
		520	530	514.2914	1026.5682	1026.5710	-2.67	0	52	1	U	R.GAGIGTPEAIK.L + [+14.0157 at E8]
		520	530	514.2914	1026.5683	1026.5710	-2.56	0	51	1	U	R.GAGIGTPEAIK.L + [+14.0157 at E8]
		520	530	514.2914	1026.5683	1026.5710	-2.56	0	52	1	U	R.GAGIGTPEAIK.L + [+14.0157 at E8]
		520	530	514.2916	1026.5687	1026.5710	-2.19	0	52	1	U	R.GAGIGTPEAIK.L + [+14.0157 at E8]
		520	530	518.2748	1034.5350	1034.5372	-2.16	0	26	1	U	R.GAGIGTPEAIK.L + [+21.9819 at E8]
		520	530	518.2750	1034.5354	1034.5372	-1.82	0	35	1	U	R.GAGIGTPEAIK.L + [+21.9819 at E8]
		520	530	518.2750	1034.5355	1034.5372	-1.70	0	39	1	U	R.GAGIGTPEAIK.L + [+21.9819 at E8]
		520	530	518.2753	1034.5360	1034.5372	-1.22	0	37	1	U	R.GAGIGTPEAIK.L + [+21.9819 at E8]
		521	530	507.2840	1012.5535	1012.5553	-1.75	0	58	1	U	G.AGIGTPEAIK.L + [+57.0215 at N-term]
		521	530	507.2844	1012.5543	1012.5553	-0.98	0	58	1	U	G.AGIGTPEAIK.L + [+57.0215 at N-term]
		521	530	507.2846	1012.5547	1012.5553	-0.55	0	53	1	U	G.AGIGTPEAIK.L + [+57.0215 at N-term]
		521	530	507.2849	1012.5551	1012.5553	-0.13	0	57	1	U	G.AGIGTPEAIK.L + [+57.0215 at N-term]
15	gi|15383744	38	60	790.7234	2369.1485	2369.1499	-0.60	0	92	1	U	F.ATVDAEELSGSHPAEVQSFVQGK.W + [-15.9949 at S11]
		38	60	790.7235	2369.1487	2369.1499	-0.52	0	81	1	U	F.ATVDAEELSGSHPAEVQSFVQGK.W + [-15.9949 at S11]
		38	60	790.7243	2369.1511	2369.1499	0.48	0	76	1	U	F.ATVDAEELSGSHPAEVQSFVQGK.W + [-15.9949 at S11]
		69	81	736.9232	1471.8319	1471.7922	26.9	0	34	1	U	N.TLLDPLNGEPFIK.V + [+15.9949 at P10]
		82	93	663.8129	1325.6113	1325.6140	-2.01	0	29	1	U	K.VAEVDESGTQPF.V + [+48.0364 at D5]
		115	124	586.8095	1171.6045	1171.5761	24.2	0	47	1	U	R.YLLYGDISTK.A + [-0.0364 at C-term K]
		115	124	586.8113	1171.6081	1171.5761	27.3	0	36	1	U	R.YLLYGDISTK.A + [-0.0364 at C-term K]
		115	124	586.8115	1171.6085	1171.5761	27.6	0	35	1	U	R.YLLYGDISTK.A + [-0.0364 at C-term K]
		115	124	586.8118	1171.6091	1171.5761	28.2	0	36	1	U	R.YLLYGDISTK.A + [-0.0364 at C-term K]
		115	124	586.8120	1171.6095	1171.5761	28.5	0	34	1	U	R.YLLYGDISTK.A + [-0.0364 at C-term K]
		115	124	586.8122	1171.6098	1171.5761	28.8	0	41	1	U	R.YLLYGDISTK.A + [-0.0364 at C-term K]
		115	124	586.8122	1171.6098	1171.5761	28.8	0	36	1	U	R.YLLYGDISTK.A + [-0.0364 at C-term K]
		115	124	586.8123	1171.6100	1171.5761	28.9	0	36	1	U	R.YLLYGDISTK.A + [-0.0364 at C-term K]
		115	124	586.8124	1171.6103	1171.5761	29.2	0	36	1	U	R.YLLYGDISTK.A + [-0.0364 at C-term K]
		115	124	586.8124	1171.6103	1171.5761	29.2	0	38	1	U	R.YLLYGDISTK.A + [-0.0364 at C-term K]
		115	124	586.8127	1171.6109	1171.5761	29.7	0	57	1	U	R.YLLYGDISTK.A + [-0.0364 at C-term K]
		115	124	586.8127	1171.6109	1171.5761	29.7	0	45	1	U	R.YLLYGDISTK.A + [-0.0364 at C-term K]
		115	124	586.8129	1171.6112	1171.5761	30.0	0	36	1	U	R.YLLYGDISTK.A + [-0.0364 at C-term K]
		115	124	586.8130	1171.6114	1171.5761	30.2	0	60	1	U	R.YLLYGDISTK.A + [-0.0364 at C-term K]
		115	124	586.8130	1171.6115	1171.5761	30.3	0	43	1	U	R.YLLYGDISTK.A + [-0.0364 at C-term K]
		115	124	586.8132	1171.6118	1171.5761	30.5	0	50	1	U	R.YLLYGDISTK.A + [-0.0364 at C-term K]
		115	124	586.8133	1171.6120	1171.5761	30.7	0	60	1	U	R.YLLYGDISTK.A + [-0.0364 at C-term K]
		115	124	586.8134	1171.6121	1171.5761	30.8	0	58	1	U	R.YLLYGDISTK.A + [-0.0364 at C-term K]
		115	124	586.8134	1171.6123	1171.5761	30.9	0	60	1	U	R.YLLYGDISTK.A + [-0.0364 at C-term K]
		115	124	586.8134	1171.6123	1171.5761	30.9	0	60	1	U	R.YLLYGDISTK.A + [-0.0364 at C-term K]
		115	124	586.8134	1171.6123	1171.5761	30.9	0	57	1	U	R.YLLYGDISTK.A + [-0.0364 at C-term K]
		115	124	586.8134	1171.6123	1171.5761	30.9	0	41	1	U	R.YLLYGDISTK.A + [-0.0364 at C-term K]
		115	124	586.8134	1171.6123	1171.5761	30.9	0	27	1	U	R.YLLYGDISTK.A + [-0.0364 at C-term K]
		115	124	586.8134	1171.6123	1171.5761	30.9	0	47	1	U	R.YLLYGDISTK.A + [-0.0364 at C-term K]
		115	124	586.8135	1171.6124	1171.5761	31.0	0	60	1	U	R.YLLYGDISTK.A + [-0.0364 at C-term K]
		115	124	586.8135	1171.6125	1171.5761	31.1	0	60	1	U	R.YLLYGDISTK.A + [-0.0364 at C-term K]
		115	124	586.8137	1171.6129	1171.5761	31.4	0	35	1	U	R.YLLYGDISTK.A + [-0.0364 at C-term K]
		115	124	586.8138	1171.6131	1171.5761	31.6	0	61	1	U	R.YLLYGDISTK.A + [-0.0364 at C-term K]
		115	124	586.8140	1171.6134	1171.5761	31.8	0	34	1	U	R.YLLYGDISTK.A + [-0.0364 at C-term K]
		115	124	586.8142	1171.6137	1171.5761	32.1	0	39	1	U	R.YLLYGDISTK.A + [-0.0364 at C-term K]
		115	124	586.8142	1171.6139	1171.5761	32.2	0	36	1	U	R.YLLYGDISTK.A + [-0.0364 at C-term K]
		115	124	586.8159	1171.6173	1171.5761	35.2	0	35	1	U	R.YLLYGDISTK.A + [-0.0364 at C-term K]
		115	124	597.8036	1193.5926	1193.5944	-1.49	0	29	1	U	R.YLLYGDISTK.A + [+21.9819 at C-term]
		115	124	597.8036	1193.5927	1193.5944	-1.39	0	42	1	U	R.YLLYGDISTK.A + [+21.9819 at C-term]
		115	124	597.8043	1193.5940	1193.5944	-0.37	0	29	1	U	R.YLLYGDISTK.A + [+21.9819 at C-term]
		115	124	597.8043	1193.5941	1193.5944	-0.27	0	28	1	U	R.YLLYGDISTK.A + [+21.9819 at C-term]
		115	124	597.8041	1193.5937	1193.5944	-0.58	0	33	1	U	R.YLLYGDISTK.A + [+21.9819 at D6]
		125	133	323.1832	966.5279	966.4957	33.3	0	35	1	U	K.AAHMLALPK.V + Oxidation (M); [-0.0364 at C-term K]
		125	133	484.2714	966.5282	966.4957	33.7	0	32	1	U	K.AAHMLALPK.V + Oxidation (M); [-0.0364 at C-term K]
		125	133	323.1835	966.5286	966.4957	34.1	0	35	1	U	K.AAHMLALPK.V + Oxidation (M); [-0.0364 at C-term K]
		125	133	323.1835	966.5288	966.4957	34.2	0	27	1	U	K.AAHMLALPK.V + Oxidation (M); [-0.0364 at C-term K]
		125	133	323.1837	966.5291	966.4957	34.6	0	28	1	U	K.AAHMLALPK.V + Oxidation (M); [-0.0364 at C-term K]
		125	133	323.1837	966.5294	966.4957	34.9	0	29	1	U	K.AAHMLALPK.V + Oxidation (M); [-0.0364 at C-term K]
		125	133	484.2721	966.5296	966.4957	35.1	0	42	1	U	K.AAHMLALPK.V + Oxidation (M); [-0.0364 at C-term K]
		125	133	323.1839	966.5299	966.4957	35.4	0	35	1	U	K.AAHMLALPK.V + Oxidation (M); [-0.0364 at C-term K]
		125	133	323.1839	966.5300	966.4957	35.5	0	35	1	U	K.AAHMLALPK.V + Oxidation (M); [-0.0364 at C-term K]
		125	133	323.1840	966.5302	966.4957	35.8	0	35	1	U	K.AAHMLALPK.V + Oxidation (M); [-0.0364 at C-term K]
		125	133	484.2724	966.5303	966.4957	35.8	0	43	1	U	K.AAHMLALPK.V + Oxidation (M); [-0.0364 at C-term K]
		125	133	323.1841	966.5305	966.4957	36.0	0	35	1	U	K.AAHMLALPK.V + Oxidation (M); [-0.0364 at C-term K]
		125	133	323.1841	966.5306	966.4957	36.1	0	35	1	U	K.AAHMLALPK.V + Oxidation (M); [-0.0364 at C-term K]
		125	133	484.2726	966.5307	966.4957	36.3	0	42	1	U	K.AAHMLALPK.V + Oxidation (M); [-0.0364 at C-term K]
		125	133	484.2727	966.5308	966.4957	36.3	0	44	1	U	K.AAHMLALPK.V + Oxidation (M); [-0.0364 at C-term K]
		125	133	323.1843	966.5310	966.4957	36.5	0	34	1	U	K.AAHMLALPK.V + Oxidation (M); [-0.0364 at C-term K]
		125	133	484.2728	966.5311	966.4957	36.7	0	42	1	U	K.AAHMLALPK.V + Oxidation (M); [-0.0364 at C-term K]
		125	133	484.2728	966.5311	966.4957	36.7	0	25	1	U	K.AAHMLALPK.V + Oxidation (M); [-0.0364 at C-term K]
		125	133	323.1838	966.5296	966.5320	-2.53	0	35	1	U	K.AAHMLALPK.V + [+15.9949 at H3]
		125	133	323.1840	966.5302	966.5320	-1.87	0	40	1	U	K.AAHMLALPK.V + [+15.9949 at H3]
		125	133	323.1841	966.5305	966.5320	-1.59	0	35	1	U	K.AAHMLALPK.V + [+15.9949 at H3]
		125	133	323.1842	966.5308	966.5320	-1.32	0	40	1	U	K.AAHMLALPK.V + [+15.9949 at H3]
		125	133	328.5158	982.5256	982.5269	-1.37	0	35	1	U	K.AAHMLALPK.V + [+31.9898 at M4]
		125	133	492.2703	982.5260	982.5269	-1.00	0	33	1	U	K.AAHMLALPK.V + [+31.9898 at M4]
		125	133	492.2703	982.5260	982.5269	-0.94	0	33	1	U	K.AAHMLALPK.V + [+31.9898 at M4]
		125	133	492.2704	982.5262	982.5269	-0.73	0	32	1	U	K.AAHMLALPK.V + [+31.9898 at M4]
		125	133	492.2704	982.5263	982.5269	-0.67	0	33	1	U	K.AAHMLALPK.V + [+31.9898 at M4]
		125	133	492.2705	982.5265	982.5269	-0.49	0	33	1	U	K.AAHMLALPK.V + [+31.9898 at M4]
		125	133	492.2707	982.5269	982.5269	-0.060	0	32	1	U	K.AAHMLALPK.V + [+31.9898 at M4]
		149	161	728.3616	1454.7087	1454.7518	-29.6	0	71	1	U	K.SYQQAAGEVFVTR.K + [+0.0364 at Q4]
		149	161	728.3617	1454.7088	1454.7518	-29.5	0	38	1	U	K.SYQQAAGEVFVTR.K + [+0.0364 at Q4]
		149	161	485.9106	1454.7098	1454.7518	-28.8	0	34	1	U	K.SYQQAAGEVFVTR.K + [+0.0364 at Q4]
		149	161	728.3624	1454.7102	1454.7518	-28.6	0	36	1	U	K.SYQQAAGEVFVTR.K + [+0.0364 at Q4]
		149	161	728.3626	1454.7107	1454.7518	-28.3	0	34	1	U	K.SYQQAAGEVFVTR.K + [+0.0364 at Q4]
		149	161	728.3627	1454.7108	1454.7518	-28.2	0	33	1	U	K.SYQQAAGEVFVTR.K + [+0.0364 at Q4]
		149	161	728.3628	1454.7110	1454.7518	-28.0	0	38	1	U	K.SYQQAAGEVFVTR.K + [+0.0364 at Q4]
		149	161	728.3632	1454.7118	1454.7518	-27.5	0	57	1	U	K.SYQQAAGEVFVTR.K + [+0.0364 at Q4]
		149	161	728.3640	1454.7133	1454.7518	-26.4	0	49	1	U	K.SYQQAAGEVFVTR.K + [+0.0364 at Q4]
		149	161	728.3640	1454.7135	1454.7518	-26.3	0	49	1	U	K.SYQQAAGEVFVTR.K + [+0.0364 at Q4]
		149	161	728.3641	1454.7136	1454.7518	-26.3	0	67	1	U	K.SYQQAAGEVFVTR.K + [+0.0364 at Q4]
		149	161	485.9118	1454.7137	1454.7518	-26.2	0	63	1	U	K.SYQQAAGEVFVTR.K + [+0.0364 at Q4]
		149	161	728.3643	1454.7141	1454.7518	-25.9	0	60	1	U	K.SYQQAAGEVFVTR.K + [+0.0364 at Q4]
		149	161	728.3644	1454.7143	1454.7518	-25.7	0	70	1	U	K.SYQQAAGEVFVTR.K + [+0.0364 at Q4]
		149	161	728.3644	1454.7143	1454.7518	-25.7	0	47	1	U	K.SYQQAAGEVFVTR.K + [+0.0364 at Q4]
		149	161	728.3646	1454.7146	1454.7518	-25.6	0	60	1	U	K.SYQQAAGEVFVTR.K + [+0.0364 at Q4]
		149	161	728.3647	1454.7148	1454.7518	-25.4	0	70	1	U	K.SYQQAAGEVFVTR.K + [+0.0364 at Q4]
		149	161	485.9123	1454.7150	1454.7518	-25.3	0	59	1	U	K.SYQQAAGEVFVTR.K + [+0.0364 at Q4]
		149	161	728.3648	1454.7151	1454.7518	-25.2	0	62	1	U	K.SYQQAAGEVFVTR.K + [+0.0364 at Q4]
		149	161	728.3648	1454.7151	1454.7518	-25.2	0	44	1	U	K.SYQQAAGEVFVTR.K + [+0.0364 at Q4]
		149	161	728.3649	1454.7153	1454.7518	-25.1	0	46	1	U	K.SYQQAAGEVFVTR.K + [+0.0364 at Q4]
		149	161	728.3650	1454.7155	1454.7518	-24.9	0	63	1	U	K.SYQQAAGEVFVTR.K + [+0.0364 at Q4]
		149	161	728.3650	1454.7155	1454.7518	-24.9	0	65	1	U	K.SYQQAAGEVFVTR.K + [+0.0364 at Q4]
		149	161	728.3652	1454.7159	1454.7518	-24.7	0	48	1	U	K.SYQQAAGEVFVTR.K + [+0.0364 at Q4]
		149	161	728.3654	1454.7162	1454.7518	-24.5	0	77	1	U	K.SYQQAAGEVFVTR.K + [+0.0364 at Q4]
		149	161	728.3655	1454.7164	1454.7518	-24.3	0	68	1	U	K.SYQQAAGEVFVTR.K + [+0.0364 at Q4]
		149	161	728.3655	1454.7164	1454.7518	-24.3	0	76	1	U	K.SYQQAAGEVFVTR.K + [+0.0364 at Q4]
		149	161	728.3657	1454.7168	1454.7518	-24.1	0	77	1	U	K.SYQQAAGEVFVTR.K + [+0.0364 at Q4]
		149	161	728.3664	1454.7182	1454.7518	-23.1	0	72	1	U	K.SYQQAAGEVFVTR.K + [+0.0364 at Q4]
		149	161	728.3667	1454.7188	1454.7518	-22.6	0	66	1	U	K.SYQQAAGEVFVTR.K + [+0.0364 at Q4]
		149	161	728.3678	1454.7210	1454.7518	-21.1	0	45	1	U	K.SYQQAAGEVFVTR.K + [+0.0364 at Q4]
		149	161	728.8637	1455.7129	1455.6994	9.25	0	44	1	U	K.SYQQAAGEVFVTR.K + [+0.9840 at Q4]
		149	161	728.8682	1455.7218	1455.6994	15.4	0	30	1	U	K.SYQQAAGEVFVTR.K + [+0.9840 at Q3]
		149	161	735.3718	1468.7290	1468.7310	-1.40	0	65	1	U	K.SYQQAAGEVFVTR.K + [+14.0157 at E8]
		149	161	735.3723	1468.7299	1468.7310	-0.75	0	58	1	U	K.SYQQAAGEVFVTR.K + [+14.0157 at E8]
		149	161	735.3724	1468.7302	1468.7310	-0.57	0	60	1	U	K.SYQQAAGEVFVTR.K + [+14.0157 at E8]
		149	161	735.3728	1468.7310	1468.7310	-0.00068	0	65	1	U	K.SYQQAAGEVFVTR.K + [+14.0157 at E8]
		149	161	735.3729	1468.7312	1468.7310	0.081	0	67	1	U	K.SYQQAAGEVFVTR.K + [+14.0157 at E8]
		149	161	735.3732	1468.7318	1468.7310	0.50	0	68	1	U	K.SYQQAAGEVFVTR.K + [+14.0157 at E8]
		149	161	735.3735	1468.7325	1468.7310	1.01	0	61	1	U	K.SYQQAAGEVFVTR.K + [+14.0157 at E8]
		149	161	498.5610	1492.6612	1492.6713	-6.77	0	29	1	U	K.SYQQAAGEVFVTR.K + [+37.9559 at E8]
		163	173	692.8182	1383.6219	1383.6605	-27.9	0	48	1	U	K.FLENFCGDQVR.F + [+0.0364 at Q9]
		163	173	692.8184	1383.6223	1383.6605	-27.6	0	48	1	U	K.FLENFCGDQVR.F + [+0.0364 at Q9]
		163	173	692.8185	1383.6224	1383.6605	-27.6	0	50	1	U	K.FLENFCGDQVR.F + [+0.0364 at Q9]
		163	173	692.8185	1383.6225	1383.6605	-27.5	0	48	1	U	K.FLENFCGDQVR.F + [+0.0364 at Q9]
		163	173	692.8187	1383.6228	1383.6605	-27.3	0	59	1	U	K.FLENFCGDQVR.F + [+0.0364 at Q9]
		163	173	692.8190	1383.6234	1383.6605	-26.8	0	50	1	U	K.FLENFCGDQVR.F + [+0.0364 at Q9]
		163	173	693.3134	1384.6123	1384.6082	2.99	0	51	1	U	K.FLENFCGDQVR.F + [+58.0055 at C6]
		163	173	693.3154	1384.6162	1384.6082	5.80	0	57	1	U	K.FLENFCGDQVR.F + [+58.0055 at C6]
		163	173	699.8262	1397.6378	1397.6398	-1.44	0	58	1	U	K.FLENFCGDQVR.F + [+14.0157 at E3]
		163	173	699.8263	1397.6380	1397.6398	-1.27	0	48	1	U	K.FLENFCGDQVR.F + [+14.0157 at E3]
		163	173	699.8266	1397.6386	1397.6398	-0.82	0	37	1	U	K.FLENFCGDQVR.F + [+14.0157 at E3]
		178	188	563.7846	1125.5547	1125.5567	-1.82	0	32	1	U	R.SFAIPGNHLGQ.Q + [-14.0157 at I4]
		178	188	563.7847	1125.5548	1125.5567	-1.71	0	32	1	U	R.SFAIPGNHLGQ.Q + [-14.0157 at I4]
		178	188	563.7848	1125.5550	1125.5567	-1.50	0	33	1	U	R.SFAIPGNHLGQ.Q + [-14.0157 at I4]
		178	188	563.7848	1125.5550	1125.5567	-1.50	0	34	1	U	R.SFAIPGNHLGQ.Q + [-14.0157 at I4]
		178	188	563.7849	1125.5553	1125.5567	-1.29	0	36	1	U	R.SFAIPGNHLGQ.Q + [-14.0157 at I4]
		178	188	563.7849	1125.5553	1125.5567	-1.29	0	32	1	U	R.SFAIPGNHLGQ.Q + [-14.0157 at I4]
		178	189	627.8138	1253.6131	1253.6153	-1.73	0	32	1	U	R.SFAIPGNHLGQQ.S + [-14.0157 at I4]
		178	189	627.8141	1253.6136	1253.6153	-1.33	0	30	1	U	R.SFAIPGNHLGQQ.S + [-14.0157 at I4]
		178	194	618.9684	1853.8833	1853.8921	-4.76	0	40	1	U	R.SFAIPGNHLGQQSHGYR.W + [-14.0157 at I4]
		178	194	618.9697	1853.8874	1853.8921	-2.58	0	37	1	U	R.SFAIPGNHLGQQSHGYR.W + [-14.0157 at I4]
		178	194	618.9717	1853.8934	1853.8921	0.68	0	41	1	U	R.SFAIPGNHLGQQSHGYR.W + [-14.0157 at I4]
		235	244	628.2946	1254.5747	1254.6134	-30.9	0	54	1	U	K.VSIVMEQMMR.L + 2 Oxidation (M); [+0.0364 at Q7]
		235	244	628.2946	1254.5747	1254.6134	-30.9	0	41	1	U	K.VSIVMEQMMR.L + 2 Oxidation (M); [+0.0364 at Q7]
		235	244	628.2948	1254.5750	1254.6134	-30.6	0	48	1	U	K.VSIVMEQMMR.L + 2 Oxidation (M); [+0.0364 at Q7]
		235	244	628.2949	1254.5752	1254.6134	-30.5	0	54	1	U	K.VSIVMEQMMR.L + 2 Oxidation (M); [+0.0364 at Q7]
		235	244	628.2949	1254.5752	1254.6134	-30.5	0	43	1	U	K.VSIVMEQMMR.L + 2 Oxidation (M); [+0.0364 at Q7]
		235	244	636.2923	1270.5700	1270.5720	-1.50	0	54	1	U	K.VSIVMEQMMR.L + 2 Oxidation (M); [+15.9949 at C-term R]
		235	244	636.2924	1270.5703	1270.5720	-1.32	0	37	1	U	K.VSIVMEQMMR.L + 2 Oxidation (M); [+15.9949 at C-term R]
		235	244	636.2927	1270.5708	1270.5720	-0.94	0	32	1	U	K.VSIVMEQMMR.L + 2 Oxidation (M); [+15.9949 at C-term R]
		235	244	636.2930	1270.5715	1270.5720	-0.36	0	56	1	U	K.VSIVMEQMMR.L + 2 Oxidation (M); [+15.9949 at C-term R]
		235	244	643.2997	1284.5848	1284.5552	23.0	0	27	1	U	K.VSIVMEQMMR.L + 2 Oxidation (M); [+29.9782 at C-term R]
		235	244	643.3002	1284.5858	1284.5876	-1.42	0	29	1	U	K.VSIVMEQMMR.L + 3 Oxidation (M); [+14.0157 at E6]
		235	244	643.7926	1285.5706	1285.5716	-0.76	0	35	1	U	K.VSIVMEQMMR.L + 3 Oxidation (M); [+14.9997 at Q7]
		235	244	644.2896	1286.5647	1286.5266	29.6	0	42	1	U	K.VSIVMEQMMR.L + Oxidation (M); [+47.9444 at M9]
		235	244	644.2907	1286.5667	1286.5266	31.2	0	35	1	U	K.VSIVMEQMMR.L + Oxidation (M); [+47.9444 at M9]
		235	244	644.2895	1286.5644	1286.5669	-1.89	0	33	1	U	K.VSIVMEQMMR.L + 2 Oxidation (M); [+31.9898 at M8]
		235	244	644.2897	1286.5649	1286.5669	-1.52	0	32	1	U	K.VSIVMEQMMR.L + 2 Oxidation (M); [+31.9898 at M8]
		235	244	644.2898	1286.5650	1286.5669	-1.43	0	39	1	U	K.VSIVMEQMMR.L + 2 Oxidation (M); [+31.9898 at C-term R]
		235	244	644.2900	1286.5655	1286.5669	-1.04	0	31	1	U	K.VSIVMEQMMR.L + 2 Oxidation (M); [+31.9898 at M5]
		235	244	644.2902	1286.5658	1286.5669	-0.85	0	37	1	U	K.VSIVMEQMMR.L + 2 Oxidation (M); [+31.9898 at M9]
		235	244	652.2886	1302.5626	1302.5618	0.63	0	39	1	U	K.VSIVMEQMMR.L + Oxidation (M); 2 [+31.9898 at M8,M9]
		235	244	652.2886	1302.5626	1302.5618	0.63	0	33	1	U	K.VSIVMEQMMR.L + Oxidation (M); 2 [+31.9898 at M8,M9]
		235	244	652.2887	1302.5628	1302.5618	0.83	0	39	1	U	K.VSIVMEQMMR.L + Oxidation (M); 2 [+31.9898 at M8,M9]
		235	244	652.2887	1302.5628	1302.5618	0.83	0	42	1	U	K.VSIVMEQMMR.L + Oxidation (M); 2 [+31.9898 at M8,M9]
		245	264	769.6991	2306.0755	2306.0525	9.96	0	34	1	U	R.LLHYCGLPAEDVDFINSDGK.T + [+43.9898 at A9]
		245	264	769.7028	2306.0865	2306.0525	14.7	0	42	1	U	R.LLHYCGLPAEDVDFINSDGK.T + [+43.9898 at A9]
		245	264	1154.0575	2306.1004	2306.0525	20.8	0	49	1	U	R.LLHYCGLPAEDVDFINSDGK.T + [+43.9898 at A9]
		245	264	1154.0620	2306.1095	2306.0525	24.7	0	38	1	U	R.LLHYCGLPAEDVDFINSDGK.T + [+43.9898 at E10]
		247	264	769.7053	2306.0940	2306.1140	-8.71	0	40	1	U	L.HYCGLPAEDVDFINSDGK.T + [+327.2410 at C3]
		250	264	802.8944	1603.7743	1603.7730	0.81	0	108	1	U	C.GLPAEDVDFINSDGK.T + [+28.0313 at A4]
		250	264	802.8954	1603.7762	1603.7730	2.04	0	75	1	U	C.GLPAEDVDFINSDGK.T + [+28.0313 at A4]
		252	264	802.3746	1602.7346	1602.6814	33.2	0	61	1	U	L.PAEDVDFINSDGK.T + [+197.0453 at E3]
		269	276	463.2759	924.5372	924.5392	-2.19	0	37	1	U	K.ILLEANPR.M
		269	276	463.2759	924.5372	924.5392	-2.19	0	38	1	U	K.ILLEANPR.M
		269	276	463.2759	924.5373	924.5392	-2.12	0	35	1	U	K.ILLEANPR.M
		269	276	463.2760	924.5375	924.5392	-1.86	0	37	1	U	K.ILLEANPR.M
		269	276	463.2762	924.5378	924.5392	-1.54	0	40	1	U	K.ILLEANPR.M
		269	276	470.2843	938.5541	938.5549	-0.83	0	43	1	U	K.ILLEANPR.M + [+14.0157 at E4]
		269	276	470.2844	938.5542	938.5549	-0.77	0	40	1	U	K.ILLEANPR.M + [+14.0157 at E4]
		269	276	470.2846	938.5545	938.5549	-0.36	0	39	1	U	K.ILLEANPR.M + [+14.0157 at E4]
		269	276	470.7759	939.5373	939.5389	-1.67	0	36	1	U	K.ILLEANPR.M + [+14.9997 at N6]
		269	276	474.2664	946.5182	946.5212	-3.18	0	30	1	U	K.ILLEANPR.M + [+21.9819 at E4]
		269	276	474.2666	946.5187	946.5212	-2.61	0	28	1	U	K.ILLEANPR.M + [+21.9819 at E4]
		277	285	500.2491	998.4835	998.4855	-1.97	0	37	1	U	R.MTLFTGSSR.V
		277	285	500.2497	998.4848	998.4855	-0.69	0	37	1	U	R.MTLFTGSSR.V
		277	285	508.2468	1014.4790	1014.4804	-1.43	0	45	1	U	R.MTLFTGSSR.V + Oxidation (M)
		277	285	508.2468	1014.4791	1014.4804	-1.31	0	45	1	U	R.MTLFTGSSR.V + Oxidation (M)
		277	285	508.2471	1014.4796	1014.4804	-0.78	0	45	1	U	R.MTLFTGSSR.V + Oxidation (M)
		277	285	529.2513	1056.4880	1056.4910	-2.83	0	40	1	U	R.MTLFTGSSR.V + [+58.0055 at N-term]
		277	285	529.2532	1056.4919	1056.4910	0.86	0	43	1	U	R.MTLFTGSSR.V + [+58.0055 at N-term]
		277	286	508.2469	1014.4793	1014.4692	9.92	1	57	1	U	R.MTLFTGSSRV.A + Oxidation (M); [-99.0796 at R9]
[truncated: 1,392 more rows]

## Sheet: Table S3b
										Avg. mass change
										phosphorylation +79.9663
										deamidation +0.984
										methylation +14.0157
										formylation +27.9949
										ethylation +28.0313
Spot no.	Version	Start a	End a	Peptide	Estimated no. of residues
					phosphorylated	deamidated	methylated	formylated	ethylated
8	NP_195146.1	55	69	C.STGDGSKPTILVAEK.L	15 (S55)*, 1 (S55, T56)*, 1 (S60)*		2 (S55), 2 (T56), 1 (D58)*, 1 (S60), 2 (D58, E68)*
		56	69	S.TGDGSKPTILVAEK.L	1 (T56)*		1 (D58)*
		62	69	K.PTILVAEK.L			3 (E68)*
		158	174	N.TIAAAEHGIALMAAMAR.N			5 (R174)
		175	184	R.NVAQADASVK.A		4 (N175), 4 (Q178)*	2 (Q178)*
		178	184	A.QADASVK.A	1 (S182)*
		185	189	K.AGEWK.R			1 (E187)*
		211	217	K.VGTEVAR.R			1 (E214)*	2 (T213)	2 (E214)
		226	237	R.VIAHDPYAPADR.A			12 (D230)*, 2 (D236)*
		271	279	K.ILNDETFAK.M	1 (T276)*	4 (N273)	2 (E275)*
		286	291	R.IVNVAR.G		2 (N288)
		292	302	R.GGVIDEDALVR.A			6 (E297)*
		326	333	D.SKLVQHER.V	8 (S326)*
		327	333	S.KLVQHER.V					2 (K327) diethyl
		398	410	R.LAVQLVAGGSGVK.N		3 (Q401)*	3 (Q401)*
		421	428	R.ATDDLDTR.L			1 (N-terminal) trimethyl
		463	467	R.LSEER.V			3 (E465)*, 2 (E466)*, 2 (E465, E466)*
		492	503	K.FASSLSESGEVK.V			4 (S499), 5 (E501)*, 1 (K503)*
		536	564	R.QVDQPGMIGTVGSILGESNVNVNFMSVGR.I			1 (E552)*
		570	583	K.QAIMAIGVDDIPSK.E					1 (K583) diethyl
		589	602	K.IGEIPAVEEFVFLK.L			1 (E591, E596)*, 1 (E596)*
		total b			(6) 479.7978 Da	(5) 4.92 Da	(25) 350.3925 Da	(1) 27.9949 Da	(5) 140.1565 Da
9	NP_195146.1	2	16	M.SATAAASSSIAVATN.S	1 (T4, T15)
		54	69	S.CSTGDGSKPTILVAEK.L	1 (T56)*
		55	69	C.STGDGSKPTILVAEK.L	9 (S55)*, 1 (T56)*, 3 (S60)*		3 (S55), 4 (T56), 1 (D58)*	2 (S55,S60)	1 (N-terminal) diethyl
		56	69	S.TGDGSKPTILVAEK.L	7 (T56)*		1 (D58)*, 1 (N-terminal) dimethyl
		57	69	T.GDGSKPTILVAEK.L	2 (S60)*
		58	69	G.DGSKPTILVAEK.L	2 (S60)*
		125	130	R.LKVVGR.A				1 (K126)
		158	174	N.TIAAAEHGIALMAAMAR.N	2 (T158)		5 (L168), 7 (R174)
		175	184	R.NVAQADASVK.A		3 (N175), 11 (Q178)*	7 (Q178)*
		211	217	K.VGTEVAR.R			1 (E214)*		1 (E214)
		226	237	R.VIAHDPYAPADR.A			14 (D230)*, 1 (D236)*
		271	279	K.ILNDETFAK.M		3 (N273)	3 (E275)*		2 (E275)
		286	291	R.IVNVAR.G		4 (N288)
		292	302	R.GGVIDEDALVR.A			9 (E297)*
		294	302	G.VIDEDALVR.A			1 (E297)*
		303	319	R.ALDAGIVAQAALDVFTK.E		1 (Q311)*	1 (Q311)*
		326	333	D.SKLVQHER.V	10 (S326)*
		327	333	S.KLVQHER.V					1 (N-terminal) diethyl
		334	339	R.VTVTPH.L	2 (T335)		2 (N-terminal) dimethyl
		377	394	M.VSAEVLTELKPYVVLAEK.L			1 (L385, L391)
		381	394	E.VLTELKPYVVLAEK.L			1 (L382, L391)
		383	394	L.TELKPYVVLAEK.L			2 (E384, E393*)
		389	394	Y.VVLAEK.L			1 (N-terminal)
		398	410	R.LAVQLVAGGSGVK.N		5 (Q401)*	4 (Q401)*
		404	413	V.AGGSGVKNAK.I	1 (S407)*				1 (K410, K413)
		421	428	R.ATDDLDTR.L			3 (N-terminal) trimethyl
		437	448	K.GIIEPISDVYVN.L	1 (S443)
		437	456	K.GIIEPISDVYVNLVNADFTA.K	1 (T455)
		463	467	R.LSEER.V			3 (E465)*, 4 (E466)*, 2 (E465, E466)*		2 (E465)
		492	503	K.FASSLSESGEVK.V	2 (S497)*		1 (E498)*, 1 (S499), 4 (E501)*, 3 (K503)*, 1 (E498, E501)*	1 (S499)	1 (E501)
		511	517	D.GVPHLTK.V			1 (N-terminal)
		536	550	R.QVDQPGMIGTVGSIL.G	2 (S548)
		536	564	R.QVDQPGMIGTVGSILGESNVNVNFMSVGR.I			1 (E552)*
		569	579	R.KQAIMAIGVDD.I		2 (Q570)*	5 (D579)*
		584	588	K.ETLKK.I	1 (T585)
		589	602	K.IGEIPAVEEFVFLK.L			1 (E591, E596)*, 1 (E591, E596, E597)*
		total			(14) 1119.5282 Da	(7) 6.888 Da	(38) 532.5966 Da	(4) 111.9796 Da	(10) 280.313 Da
14	AAK73756.1	149	161	K.SYQQAAGEVFVTR.K			3 (E156)*
		235	244	K.VSIVMEQMMR.L			2 (E240)*
		269	276	K.ILLEANPR.M			8 (E272)*
		300	308	R.LEDAGFDWK.V			3 (E301)*
		434	440	K.TYELVTK.E			3 (E436)*
		441	453	K.EIFGPFQIVTEYK.K			1 (E451)*
		455	466	K.DQLPLVLDALER.M			1 (R466)*
		520	530	R.GAGIGTPEAIK.L			4 (E527)*
		total			N.D.	N.D.	(8) 112.1256 Da	N.D.	N.D.
15	AAK73756.1	149	161	K.SYQQAAGEVFVTR.K		1 (Q151)*, 1 (Q152)*c	7 (E156)*
		163	173	K.FLENFCGDQVR.F			3 (E165)*
		235	244	K.VSIVMEQMMR.L		1 (Q241)*	1 (E240)*, 1 (Q241)*
		269	276	K.ILLEANPR.M		1 (N274)	3 (E272)*, 1 (N274)*
		300	308	R.LEDAGFDWK.V			5 (E301)*
		386	396	H.MENLLQIPGSK.L			3 (N-terminal)
		434	440	K.TYELVTK.E			3 (E436)*
		441	453	K.EIFGPFQIVTEYK.K			1 (T450), 1 (E451)*
		447	453	F.QIVTEYK.K			1 (E451)*
		455	466	K.DQLPLVLDALER.M			1 (L464), 1 (E465)*, 2 (R466)*
		460	466	L.VLDALER.M			1 (E465)*
		485	500	Q.EVIGNSVNGTTYAGLR.G		1 (N492)
		490	500	N.SVNGTTYAGLR.G		3 (N492)
		520	530	R.GAGIGTPEAIK.L			3 (E527)*
		total			N.D.	(5) 4.92 Da	(15) 210.2355 Da	N.D.	N.D.
16	CAA61511.1	107	113	K.VLAEEGK.A			3 (E110)*		1 (E110)
		107	115	K.VLAEEGKAK.A				1 (K113)
		116	124	K.AIAFDEIDK.A			3 (E121)*, 2 (I122), 1 (K124)*, 3 (E121, D123)*		1 (E121)
		116	129	K.AIAFDEIDKAPEEK.K			3 (E121)*, 4 (E127)*, 2 (E128)*, 3 (K129)*, 2 (E127, E128)*, 1 (E121, E127)*
		132	146	R.GITIATAHVEYETAK.R	1 (Y142)*		2 (E141)*, 8 (E143)*
		137	146	A.TAHVEYETAK.R			1 (E143)*
		140	146	H.VEYETAK.R			2 (E143)*, 2 (E141, E143)*
		177	189	L.VVSGPDGPMPQTK.E		1 (Q187)
		222	227	L.VEMELR.E			2 (E223)
		235	244	K.FPGDDIPIIR.G			2 (D238)*, 7 (D239)*, 1 (I242)
		245	260	R.GSALSALQGTNDEIGR.Q	9 (S249)*, 1 (T254)*	1 (Q252)*	1 (E257)*, 1 (Q252)*
		246	260	G.SALSALQGTNDEIGR.Q	2 (S249)*, 1 (S246, S249)*
		248	260	A.LSALQGTNDEIGR.Q	7 (S249)*
		249	260	L.SALQGTNDEIGR.Q	1 (S249)*
		250	260	S.ALQGTNDEIGR.Q			1 (E257)*
		252	260	L.QGTNDEIGR.Q			1 (E257)*
		266	279	K.LMDAVDEYIPDPVR.V			12 (E272)*, 1 (D268, E272)*, 5 (E272, D276)*
		306	312	R.IEQGVIK.V		3 (Q308)*	2 (E307)*, 1 (Q308)*
		331	340	K.STVTGVEMFK.K			4 (E337)*
		342	357	K.ILDNGQAGDNVGLLLR.G		4 (N345)*d, 3 (Q347)*e	1 (N-terminal), 4 (Q347)*
		361	366	K.REDIQR.G		4 (Q365)*
		362	366	R.EDIQR.G		2 (Q365)*	2 (Q365)*
		412	418	R.TADITGK.V				2 (K418)
		419	426	K.VELPENVK.M			1 (E423)*
		total			(4) 319.8652 Da	(6) 5.904 Da	(26) 364.4082 Da	(2) 55.9898 Da	(2) 56.0626 Da
17	CAA61511.1	76	80	M.ATFTR.N			4 (N-terminal)
		107	113	K.VLAEEGK.A			4 (E110)*
		116	124	K.AIAFDEIDK.A			1 (E121), 1 (I122)
		116	129	K.AIAFDEIDKAPEEK.K			3 (K129)*
		132	146	R.GITIATAHVEYETAK.R			1 (E141)*, 2 (E143)*
		133	146	G.ITIATAHVEYETAK.R					2 (N-terminal) diethyl
		140	146	H.VEYETAK.R			2 (E141)*, 1 (E141, E143)*
		163	187	K.NMITGAAQMDGGILVVSGPDGPMPQ.T			1 (N-terminal) dimethyl
		235	244	K.FPGDDIPIIR.G			5 (D239)*
		245	260	R.GSALSALQGTNDEIGR.Q		6 (Q252)*	4 (E257)*
		247	260	S.ALSALQGTNDEIGR.Q	2 (S249)*
		248	260	A.LSALQGTNDEIGR.Q	2 (S249)*
		249	260	L.SALQGTNDEIGR.Q			1 (E257)*
		266	279	K.LMDAVDEYIPDPVR.V			8 (E272)*, 1 (D276)*, 1 (D271, D276)*
		306	312	R.IEQGVIK.V		2 (Q308)*	2 (E307)*
		331	340	K.STVTGVEMFK.K			4 (E337)*
		342	357	K.ILDNGQAGDNVGLLLR.G		1 (N345)*d, 4 (Q347)*e	4 (Q347)*
		382	391	K.FEAEIYVLTK.D			1 (E383)*
		412	418	R.TADITGK.V				2 (K418)
		419	426	K.VELPENVK.M		1 (N424)	2 (E420)*, 2 (E423)*
		total			(1) 79.9663 Da	(5) 4.92 Da	(20) 280.314 Da	(1) 27.9949 Da	(2) 56.0626 Da
19	NP_850415.1	43	55	K.SQLQELIPEQQDR.L		2 (Q44)*, 3 (Q52)*	2 (Q44)*, 4 (E47)*, 1 (E51)*, 2 (Q52)*, 1 (R55)*, 1 (E47, D54)*, 1 (E47, E51)*
		103	111	R.GLSIPECQK.V		5 (Q110)*	2 (E108)*
		141	152	E.QVEALSKDLANR.A	1 (S146)*
		177	191	F.ASGVMALQVQSEFQK.A		1 (Q184), 6 (Q186), 1 (Q190)	2 (Q186), 3 (E188), 1 (Q190)
		192	199	K.AYENGIHK.S		4 (N195)*	.
		231	239	K.NGDSIPSDK.S		4 (N231)*
		321	332	K.SVVEECGEDISK.E			2 (E324), 1 (E325), 1 (D329)
		387	400	K.LYEVVPPVLTELGK.V			1 (T396)
		448	455	R.ALGLALER.P			1 (E454)*
		total			(1) +79.9663 Da	(8) 7.872 Da	(15) 210.2355 Da	N.D.	N.D.
20	NP_850415.1	31	42	W.IQMQSSTDLDLK.S	1 (S36)*
		43	55	K.SQLQELIPEQQDR.L		3 (Q44)*, 2 (Q52)*	1 (S43), 1 (Q44)*, 4 (E47)*, 2 (E47, E51)*, 3 (E51)*, 2 (Q52)*, 1 (R55)*
		103	111	R.GLSIPECQK.V		9 (Q110)*	1 (E108)*
		140	147	K.EQVEALSK.D		3 (Q141)*	1 (Q141)*, 4 (E143)*
		177	191	F.ASGVMALQVQSEFQK.A		4 (Q186), 1 (Q190)	2 (Q186), 2 (E188), 1 (Q190)
		192	199	K.AYENGIHK.S		3 (N195)*
		231	239	K.NGDSIPSDK.S		5 (N231)*
		232	239	N.GDSIPSDK.S	1 (S234)*
		321	332	K.SVVEECGEDISK.E			3 (E324)*, 1 (D329)*
		387	400	K.LYEVVPPVLTELGK.V	1 (T396)*		1 (E397)*, 1 (K400)*
		total			(3) +239.8989 Da	(8) 7.872 Da	(16) 224.2512 Da	N.D.	N.D.
Summary- mass difference of investigated PTMs between double spots
Spot pair					Phosphorylation	Deamidation	Methylation	Formylation	Ethylation	Approximate total mass difference	Spot experimental mass difference (2D electrophoresis)
spot no. 9- spot no. 8					639.7304 Da increase	1.968 Da increase	182.2041 Da increase	83.9847 Da increase	140.1565 Da increase	1.05 kDa increase	ca. 1 kDa increase
spot no.15- spot no. 14					N.D.	4.92 Da increase	98.1099 Da increase	N.D.	N.D.	0.1 kDa increase	ca. 1 kDa decrease
spot no. 17- spot no. 16					239.8989 Da decrease	0.984 Da decrease	84.0942 Da decrease	27.9949 Da decrease	0 Da	0.35 kDa decrease	0 kDa
spot no. 20- spot no. 19					159.9326 Da increase	0 Da	14.0157 Da increase	N.D.	N.D.	0.17 kDa increase	ca. 1 kDa decrease
